# Supplementary material for: Visible light mediated iron-catalyzed addition of oxamic acids to imines
Source: Royal Society of Chemistry journal article supplement (doi:10.1039/d4ra02258k), 2024-01-01
Supplement: d4ra02258k1.pdf [file d4ra02258k1.pdf]

---

## SUPPORTING INFORMATION

---

# Visible light Mediated Iron-Catalyzed Addition of Oxamic Acids to Imines

Margaux Badufle,<sup>a</sup> Frédéric Robert,<sup>a</sup> and Yannick Landais\*<sup>a</sup>

<sup>a</sup> Univ. Bordeaux, CNRS, Bordeaux INP, ISM, UMR 5255, F-33400 Talence, France.

*e-mail* : [yannick.landais@u-bordeaux.fr](mailto:yannick.landais@u-bordeaux.fr)

### Table of content

|     |                                                                              |    |
|-----|------------------------------------------------------------------------------|----|
| 1.  | GENERAL INFORMATION .....                                                    | 1  |
| 2.  | SYNTHESIS OF OXAMIC ACIDS AS STARTING MATERIALS.....                         | 1  |
| 3.  | SYNTHESIS OF IMINES AS STARTING MATERIALS .....                              | 3  |
| 4.  | MECHANISTIC STUDIES.....                                                     | 5  |
| 5.  | OPTIMIZATION OF THE THREE-COMPONENT REACTION.....                            | 7  |
| 6.  | VISIBLE LIGHT MEDIATED IRON-CATALYZED SYNTHESIS OF A-AMINO ACID AMIDES ..... | 7  |
| 7.  | UNSUCCESSFUL EXAMPLES AND RATIONALIZATION OF SOME LOW YIELDS .....           | 8  |
| 8.  | CHARACTERIZATION OF PRODUCTS.....                                            | 8  |
| 9.  | REFERENCES .....                                                             | 24 |
| 10. | NMR SPECTRA .....                                                            | 24 |

## 1. General information

Used reagents were purchased from Sigma-Aldrich, TCI, Fluorochem, BDLPharm. Solvents, aldehydes and amines were freshly distilled on CaH<sub>2</sub> or recrystallized in appropriate solvent.

NMR analysis were performed using Bruker NEO 300 equipped with a 5 mm BBFO probe (with z-gradients) which tunes to nuclei in the range between <sup>109</sup>Ag and <sup>31</sup>P (<sup>1</sup>H NMR: 300 MHz, <sup>19</sup>F NMR: 272 MHz, <sup>13</sup>C NMR: 75MHz). All NMR spectra were phased and baseline-corrected. Chemical shifts were referenced to the TMS signal. Unless otherwise indicated, the corresponding chemical shifts (δ) and coupling constants (J) are expressed in ppm and Hz. For the multiplicity: broad singlet = bs, singlet = s, doublet = d, triplet = t, quartet = q, doublet of doublets = dd, and multiplets = m.

FT-IR analysis were performed using a Perkin- Elmer Spectrum 100 using film technique on a KBr disc.

High-resolution mass spectra (HRMS) analysis were obtained thanks to a QExactive<sup>TM</sup> benchtop Orbitrap mass spectrometer coupled to a Vanquish UHPLC system (Thermo Scientific, San Jose, USA) using electrospray ionization mode. The instrument was equipped with an ESI source and spectra were recorded either in the negative or positive mode. Full MS scans were acquired over the range 50-1300 m/z. Analyses were processed by direct infusion (FIA). Samples were introduced by injection through a 20 μL sample loop from the LC pump. XCalibur software version 4.1 was used for data acquisition and FreeStyle software version 1.5 for processing (Thermo Scientific, San Jose, USA).

Melting point were measured using Stuart melting point apparatus SMP10.

Thin-layer chromatography (TLC) was performed using silica gel 60 F254 pre-coated plates (Merck) and revealed with UV light (254 nm) or Hanessian's stain.

Silica (0.043-0.063 mm) was used for flash column chromatography on silica gel, with Cyclohexane:ethyl acetate (Chex:EtOAc) solvent system as eluent.

## 2. Synthesis of oxamic acids as starting materials

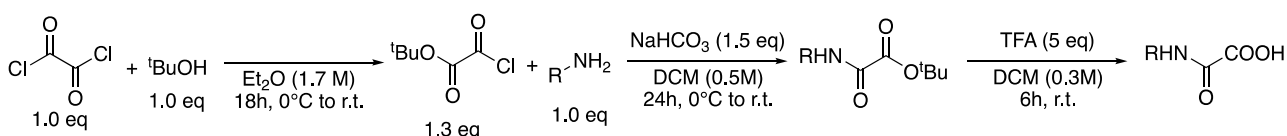

All oxamic acids were synthesized in three steps, following an adapted previous reported procedure<sup>1</sup>

### PROCEDURE A:

A solution of <sup>t</sup>BuOH (1.0 eq.) in Et<sub>2</sub>O (1.7M) was added dropwise into a 0°C solution of oxalyl chloride (1.0 eq.) in Et<sub>2</sub>O (2.5M). The mixture was warmed up to r.t. and stirred at r.t. overnight. Excess of solvent and oxalyl chloride were removed to get *tert*-butyl oxalyl chloride, which was used as obtained in the next reaction.

A solution of *tert*-butyl oxalyl chloride (1.3 eq.) in DCM (1M) was added dropwise to a 0°C solution of corresponding amine (1.0 eq.) and NaHCO<sub>3</sub> (1.5 eq) in DCM (1M). The mixture was stirred at r.t. overnight, then dissolved in EtOAc and water. Layers were separated and the aqueous one was extracted with EtOAc. Gathered organic layers were washed with brine, dried over Na<sub>2</sub>SO<sub>4</sub> and evaporated to dryness to get crude material, which was used as obtained in next reaction.

Oxamate (1.0 eq.), DCM (0.3M) and TFA (5.0 eq.) were stirred at r.t. until completion of the reaction monitored by TLC (Chex/EtOAc 90:10). Solvent and excess of acid were removed by evaporation and the crude mixture was purified by reprecipitation from DCM/PE 1:10 to afford pure compound.

Following oxamic acids were synthesized following procedure A and analytical data were identical to those previously reported<sup>2,3,4,5,6,7,8,9,10,11</sup>. New oxamic acids are described below.

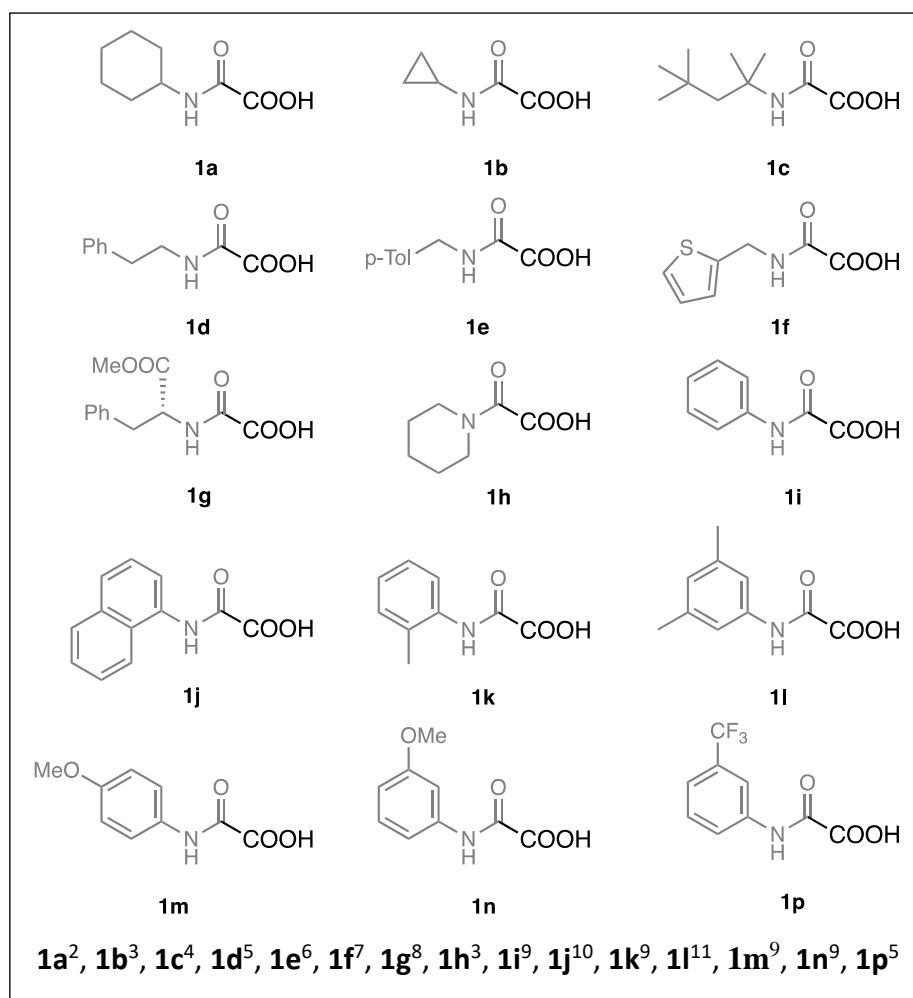

Figure 1: Previously described oxamic acids

### *N*-(2-methoxyphenyl)oxamic acid

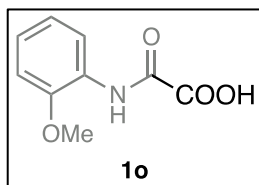

Following general procedure A, **1o** was obtained from *tert*-butyl (2-methoxyphenyl)oxamate (4.0 g, 15.9 mmol, 1.0 eq.) as a fine white crystalline powder (2.57 g, 83%).

<sup>1</sup>H NMR (CDCl<sub>3</sub>, 300 MHz) : δ<sub>H</sub> 9.62 (1H, br s), 8.32-8.29 (1H, dd, *J* = 8.0 Hz, *J* = 1.6 Hz), 7.21-7.16 (1H, ddd, *J* = 8.1 Hz, *J* = 7.6 Hz, *J* = 1.6 Hz), 7.04-7.98 (1H, ddd, *J* = 7.9 Hz, *J* = 7.6 Hz, *J* = 1.1 Hz), 6.98-6.92 (1H, dd, *J* = 8.2 Hz, *J* = 1.3 Hz), 3.93 (3H, s).

<sup>13</sup>C NMR (CDCl<sub>3</sub>, 75 MHz) : δ<sub>C</sub> 160.2, 154.8, 149.0, 126.4, 125.3, 121.2, 120.1, 110.5, 56.0.

FTIR (film, KBr): ν (cm<sup>-1</sup>) = 3384, 3240, 1688, 1598, 1547, 1487, 1465, 1435, 1356, 1333, 1291, 1252, 1197, 1177, 1161, 1115, 1042, 1027, 782, 761, 734, 698.

HRMS (TOF/ESI<sup>-</sup>) Calculated for C<sub>9</sub>H<sub>8</sub>O<sub>4</sub>N [M-H]<sup>-</sup> 194.04588 found 194.04548.

m.p. 151°C (DCM/PE 1:10)

### ***N*-(4-trifluoromethylphenyl)oxamic acid**

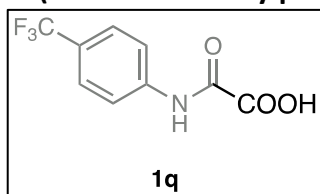

Following general procedure A, **1q** was obtained from *tert*-butyl (4-trifluoromethylphenyl)oxamate (4.0 g, 13.8 mmol, 1.0 eq.) as a fine white crystalline powder (2.98 g, 92%).

**<sup>1</sup>H NMR (CDCl<sub>3</sub>, 300 MHz) :** δ<sub>H</sub> 9.11 (1H, br s), 7.79-7.77 (2H, m), 7.69-7.67 (2H, m).

**<sup>19</sup>F NMR (Acetone d<sub>6</sub>, 282 MHz) :** δ<sub>F</sub> -62.7

**<sup>13</sup>C NMR (Acetone d<sub>6</sub>, 75 MHz) :** δ<sub>C</sub> 206.6, 161.5 (d, *J*<sub>C-F</sub> = 2.8 Hz), 156.9 (q, *J*<sub>C-F</sub> = 5.9 Hz), 141.8 (d, *J*<sub>C-F</sub> = 7.6 Hz), 127.0 (q, *J*<sub>C-F</sub> = 4.0 Hz), 126.9 (q, *J*<sub>C-F</sub> = 32 Hz), 126.2 (q, *J*<sub>C-F</sub> = 272 Hz), 121.1 (d, *J*<sub>C-F</sub> = 5.9 Hz).

**FTIR (film, KBr):** ν (cm<sup>-1</sup>) = 3307, 1757, 1687, 1619, 1605, 1551, 1415, 1333, 1312, 1254, 1210, 1167, 1126, 111, 1070, 1018, 934, 841.

**HRMS (TOF/ESI<sup>-</sup>)** Calculated for C<sub>9</sub>H<sub>5</sub>O<sub>3</sub>NF<sub>3</sub> [M-H]<sup>-</sup> 232.02270, found 232.02227.

**m.p.** 181°C (DCM/PE 1:10)

### ***N*-(4-ethoxycarbonylphenyl)oxamic acid**

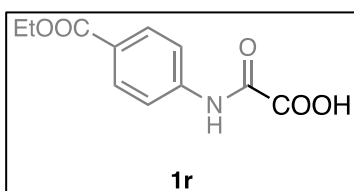

Following general procedure A, **1r** was obtained from *tert*-butyl (4-ethoxycarbonylphenyl)oxamate (5.0 g, 16.3 mmol, 1.0 eq.) as a fine white crystalline powder (3.56 g, 92%).

**<sup>1</sup>H NMR (Acetone d<sub>6</sub>, 300 MHz) :** δ<sub>H</sub> 10.22 (1H, br s), 8.05-7.97 (4H, m), 5.55 (1H, br s), 4.37 (2H, q, *J* = 7.1 Hz), 1.38-1.33 (3H, t, *J* = 7.1 Hz).

**<sup>13</sup>C NMR (CDCl<sub>3</sub>, 75 MHz) :** δ<sub>C</sub> 206.3, 166.2, 161.6, 156.9, 142.5, 131.2, 127.6, 120.5, 120.4, 61.4, 14.6.

**FTIR (film, KBr):** ν (cm<sup>-1</sup>) = 3499, 3434, 3318, 1717, 1696, 1605, 1542, 1284, 1174, 1112, 1018, 863, 769, 747, 726.

**HRMS (TOF/ESI<sup>-</sup>)** Calculated for C<sub>11</sub>H<sub>10</sub>O<sub>5</sub>N [M-H]<sup>-</sup> 236.05645 found 236.05610.

**m.p.** 182°C (DCM/PE 1:10)

## **3. Synthesis of imines as starting materials**

### **PROCEDURE B:**

All imines were synthesized according to a previously reported procedure<sup>12</sup>.

Aniline (1 eq.) and aldehyde (1 eq.) were refluxed into ethanol (0.2M) overnight. Mixture was cooled down to r.t. The obtained precipitate was filtered and washed with EtOAc and the crude mixture was recrystallized from appropriate solvent to get pure awaited compound.

### ***N*-[(4-methoxyphenyl)methylene]-4-(trifluoromethyl)benzenamine**

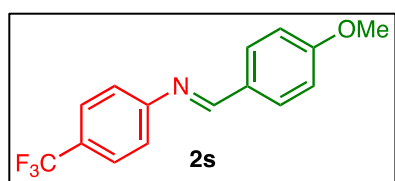

Following the general procedure B, **2a** was obtained from anisaldehyde (845 mg, 6.2 mmol, 1.0 eq.) and (4-trifluoromethyl)aniline (1.000 g, 6.2 mmol, 1.0 eq.) as a pale yellow powder (1.43, 5.14 mmol, 83%), after recrystallisation from diisopropylether.

**<sup>1</sup>H NMR (CDCl<sub>3</sub>, 300 MHz) :** δ<sub>H</sub> 8.35 (1H, s), 7.88-7.85 (2H, m), 7.65-7.62 (2H, m), 7.25-7.22 (2H, m), 7.02-6.99 (2H, m), 3.89 (3H, s). Analytical data were identical with those previously reported<sup>12</sup>.

### ***N*-[(3-fluoro)phenylmethylene]-4-(cyano)benzenamine**

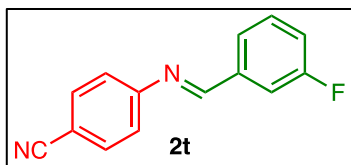

Following the general procedure B, **2t** was obtained from 3-fluorobenzaldehyde (1.000 g, 8.1 mmol, 1.0 eq.) and 4-aminobenzonitrile (952 mg, 8.1 mmol, 1.0 eq.) as a pale yellow powder (0.89 g, 4.05 mmol, 50%) after recrystallization from EtOAc then diisopropylether.

Analytical data were identical with those previously reported<sup>13</sup>.

Analytical data were identical with those previously reported<sup>13</sup>.

### **Methyl 4-[[[(3,4-dibromophenyl)imino]methyl]benzoate**

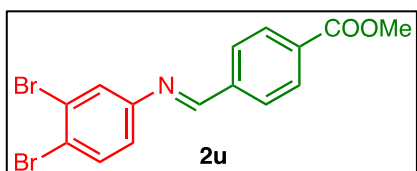

Following the general procedure B, **2u** was obtained from 3,4-dibromoaniline (1.53 g, 6.1 mmol, 1.0 eq.) and methyl 4-formylbenzoate (1.00 g, 6.1 mmol, 1.0 eq.) as a pale yellow crystal (1.89 g, 4.8 mmol, 79%, 91% pure) after recrystallization from EtOAc then diisopropylether.

**<sup>1</sup>H NMR (CDCl<sub>3</sub>, 300 MHz)** :  $\delta_{\text{H}}$  8.47 (1H, s), 8.16-8.13 (2H, m), 7.98-7.94 (2H, m), 7.65-7.62 (1H, d,  $J$  = 8.5 Hz), 7.50-7.49 (d,  $J$  = 2.4 Hz), 7.07-7.04 (1H, dd,  $J$  = 8.4 Hz,  $J$  = 2.4 Hz).

**<sup>13</sup>C NMR (CDCl<sub>3</sub>, 75 MHz)** :  $\delta_{\text{C}}$  166.4, 160.3, 151.5, 139.3, 134.0, 132.9, 130.1, 128.9, 125.8, 125.2, 122.1, 121.6, 52.4.

**FTIR (film, KBr):  $\nu$  (cm<sup>-1</sup>)** = 2994, 2949, 2886, 1720, 1627, 1568, 1547, 1454, 1435, 1412, 1358, 1278, 1229, 1187, 1107, 1010, 899, 867, 855, 813, 767, 697.

**HRMS (TOF/ESI)** Calculated for C<sub>15</sub>H<sub>12</sub>O<sub>2</sub>NBr<sub>2</sub> [M+H]<sup>+</sup> 395.92293 found 395.92166.

**m.p.** 127°C (diisopropylether).

### **Ethyl 4-[[[(4-cyanophenyl)methylene]amino]benzoate**

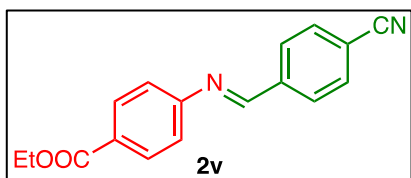

**2v** was obtained from fusion of 4-cyanobenzaldehyde (794 mg, 6.1 mmol, 1.0 eq.) and benzocaine (1.000 g, 6.1 mmol, 1.0 eq.) and after a recrystallisation from Et<sub>2</sub>O then diisopropylether as a pale yellow crystal (1.45g, 5.2 mmol, 86%, 94% pure).

**<sup>1</sup>H NMR (CDCl<sub>3</sub>, 300 MHz)** :  $\delta_{\text{H}}$  8.47 (1H, s), 8.16-8.13 (2H, m), 7.98-7.94 (2H, m), 7.65-7.62 (1H, m), 7.50-7.49 (1H, m), 7.07-7.04 (1H, m), 3.96 (3H, s).

Analytical data were identical with those previously reported<sup>13</sup>.

**<sup>1</sup>H NMR (CDCl<sub>3</sub>, 300 MHz)** :  $\delta_{\text{H}}$  8.47 (1H, s), 8.10-8.06 (2H, m), 8.03-8.00 (2H, m), 7.78-7.75 (2H, m), 7.23-7.20 (2H, m), 4.41-4.34 (2H, q,  $J$  = 7.1 Hz), 1.42-1.37 (3H, t,  $J$  = 7.1 Hz).

**<sup>13</sup>C NMR (CDCl<sub>3</sub>, 75 MHz)** :  $\delta_{\text{C}}$  166.2, 159.4, 155.1, 139.6, 132.6, 130.9, 129.3, 128.6, 120.6, 118.4, 115.0, 61.1, 14.4.

**FTIR (film, KBr):  $\nu$  (cm<sup>-1</sup>)** = 3053, 2992, 2909, 2224, 1703, 1599, 1284, 1199, 1170, 1126, 1106, 1025, 989, 896, 839, 774, 701, 557.

**HRMS (TOF/ESI)** Calculated for C<sub>17</sub>H<sub>15</sub>O<sub>2</sub>N<sub>2</sub> [M+H]<sup>+</sup> 279.11280 found 279.11188.

**m.p.** 162°C (diisopropylether).

#### 4. Mechanistic studies

##### a) Radical trapping experiment using TEMPO

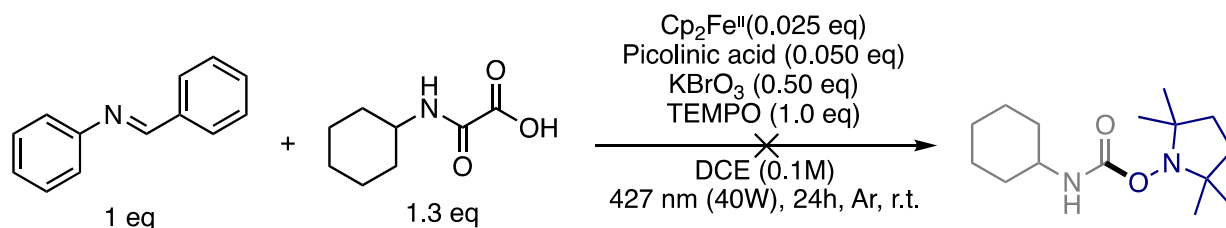

Following optimized conditions, reaction was performed adding TEMPO (1.0 eq.) as a radical trap. To a dried sealed Schlenk tube under Argon were charged oxamic acid (1 eq.), ferrocene (0.025 eq.), imine (1 eq.), picolinic acid (0.050 eq.),  $\text{KBrO}_3$  (0.50 eq.), TEMPO (1.0 eq.). The tube was evacuated and refilled with Argon 3 times. Then distilled dried-solvent (0.1 M) was added. The mixture was purged with Argon. The tube was sealed and the mixture was irradiated with a Kessil lamp (40W, 427 nm, 5 cm away from the light source, cooled to r.t. with a fan) over 24h. Solvent was evaporated to dryness to get a crude mixture. A sample was analyzed by GC-MS and crude NMR was obtained using mesitylene as an external standard.

Only traces of **3a** were detected by GC-MS (5% NMR yield) suggesting that TEMPO interfered in the radical reaction process. Moreover, several by-products from isocyanate and carbamoyl radical were observed by GC-MS.

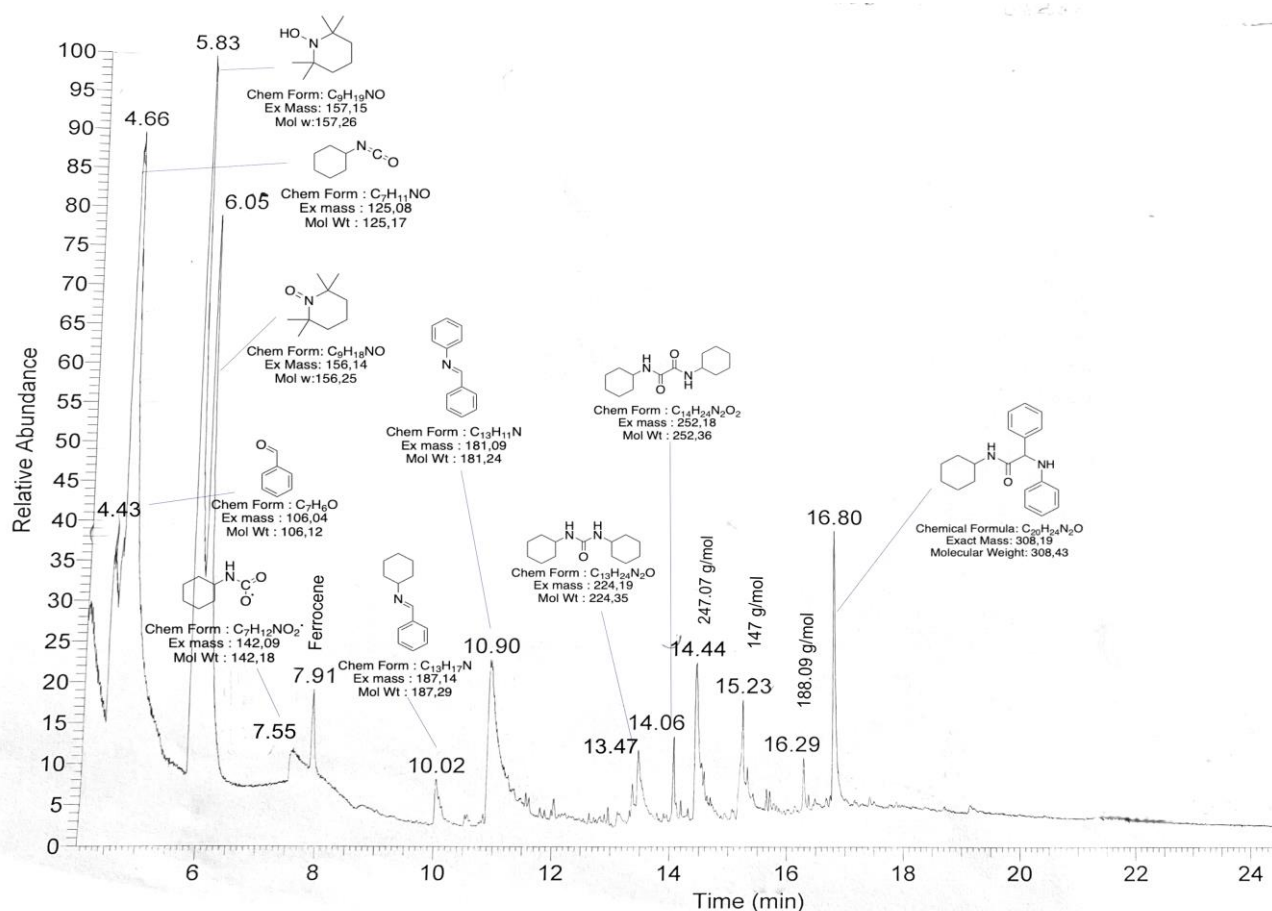

Figure 2: GC-MS of the reference reaction with TEMPO

## b) Radical trapping experiment using 1,1-diphenylethylene

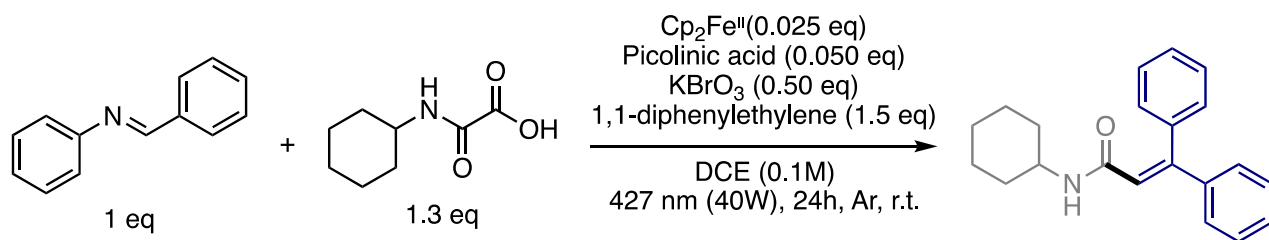

Following optimized conditions, reaction was performed adding 1,1-diphenylethylene (1.5 eq.) as a radical trap. To a dried sealed Schlenk tube under Argon were charged oxamic acid (1 eq.), ferrocene (0.025 eq.), imine (1 eq.), picolinic acid (0.050 eq.),  $\text{KBrO}_3$  (0.50 eq.), 1,1-diphenylethylene (1.5 eq.). The tube was evacuated and refilled with Argon 3 times. Then distilled dried-solvent (0.1 M) was added. The mixture was purged with Argon. The tube was sealed and the mixture irradiated with a Kessil lamp (40W, 427 nm, 5 cm away from the light source, cooled to r.t. with a fan) over 24h. The solvent was evaporated to dryness to get the crude product. A sample was analyzed by GC-MS and the crude was purified by flash column chromatography on silica gel (3 cm x 10 cm,  $\text{SiO}_2$  x 100: 35g) using Chex:EtOAc as a solvent system for elution.

Awaited *N*-(cyclohexyl)-2-diphenyl-2-ethenamine was isolated with a 33% yield and compound **3a** was isolated with a 29% yield.

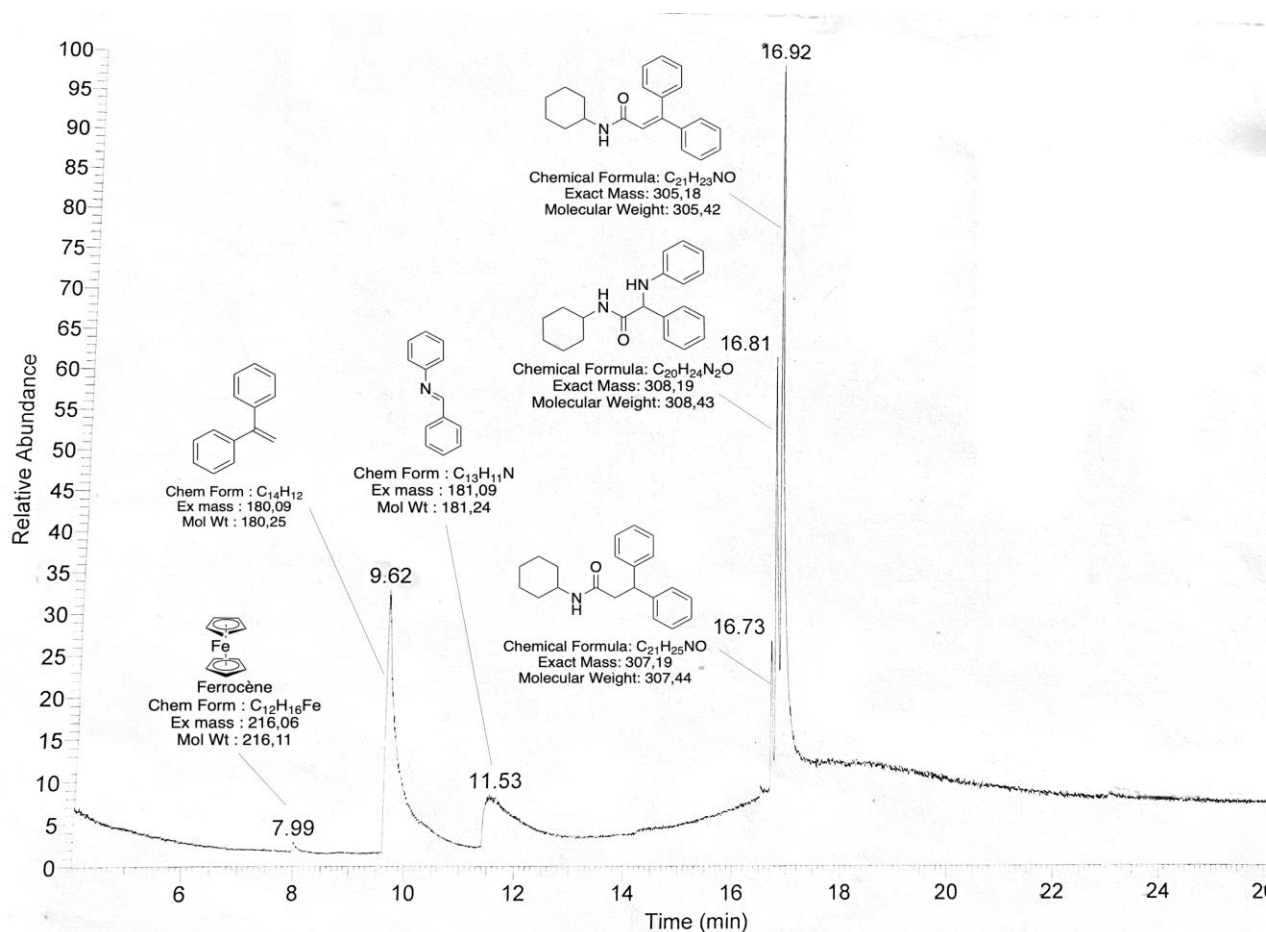

Figure 3: GC-MS of the reference reaction with 1,1-diphenylethylene

## 5. Optimization of the three-component reaction

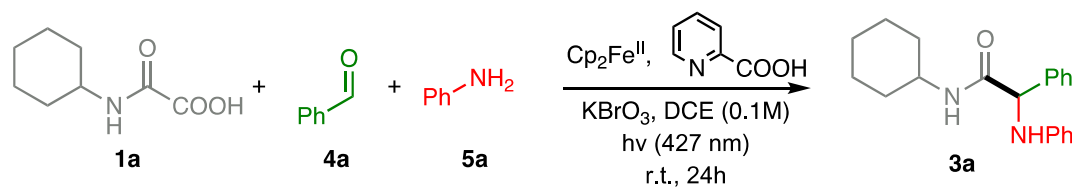

| Oxamic acid (eq.) | Aldehyde (eq.) | Amine (eq.) | Oxidant (eq.)          | Fe cat. (eq.) | Ligand (eq.) | Solvent (M) | Isolated yield |
|-------------------|----------------|-------------|------------------------|---------------|--------------|-------------|----------------|
| 1.3               | 1.0            | 1.0         | $\text{KBrO}_3$ (0.50) | 0.025         | 0.050        | DCE (0.1)   | 66%            |
| 1.0               | 1.0            | 1.0         | $\text{KBrO}_3$ (0.50) | 0.025         | 0.050        | DCE (0.1)   | 66%            |
| 1.0               | 1.1            | 1.1         | $\text{KBrO}_3$ (0.50) | 0.025         | 0.050        | DCE (0.1)   | 66%            |
| 1.0               | 1.2            | 1.2         | $\text{KBrO}_3$ (0.50) | 0.025         | 0.050        | DCE (0.1)   | 69%            |
| 1.0               | 1.3            | 1.3         | $\text{KBrO}_3$ (0.50) | 0.025         | 0.050        | DCE (0.1)   | 78%            |

## 6. Visible light mediated iron-catalyzed synthesis of $\alpha$ -amino acid amides

### Procedure C: two components reaction

To a dried sealed Schlenk tube under Argon were charged oxamic acid (1 eq.), ferrocene (0.025 eq.), imine (1 eq.), picolinic acid (0.050 eq.) and  $\text{KBrO}_3$  (0.50 eq.). The tube was evacuated and refilled with Argon 3 times. Then distilled dried-solvent (0.1 M) was added. The mixture was purged with Argon. The tube was sealed and the mixture irradiated with a Kessil lamp (40W, 427 nm, 5 cm away from the light source, cooled to r.t. with a fan) over 24h. Solvent was evaporated to dryness to get a crude mixture that was purified by flash column chromatography on silica gel (3 cm x 10 cm,  $\text{SiO}_2$  x 100: 35g) using Chex:EtOAc as a solvent system for elution. If the compound was not pure enough, it was sonicated in pentane, filtered and dried. Then recrystallized from toluene, filtered and dried. Traces of toluene were removed by redissolving the compound twice in MeOH then  $\text{CHCl}_3$ .

### Procedure D: three components reaction

To a dried sealed Schlenk tube under Argon were charged oxamic acid (1 eq.), ferrocene (0.025 eq.), picolinic acid (0.050 eq.),  $\text{KBrO}_3$  (0.50 eq.) and aldehyde (1.0 eq.) and/or amine (1.0 eq.) if they were solids. The tube was evacuated and refilled with Argon 3 times. Then distilled dried-solvent (0.1 M) was added. The mixture was purged with Argon. Aldehyde (1.0 eq.) and amine (1.0 eq.) were finally added at this point if they were liquids. The tube was sealed and the mixture irradiated with a Kessil lamp (40W, 427 nm, 5 cm away from the light source, cooled to r.t. with a fan) over 24h. Solvent was evaporated to dryness to get a crude mixture that was purified by flash column chromatography on silica gel (3 cm x 10 cm,  $\text{SiO}_2$  x 100: 35g) using Chex:EtOAc as a solvent system for elution. If the compound was not pure enough, it was sonicated in pentane, filtered and dried. Then recrystallized from toluene, filtered and dried. Traces of toluene were removed by redissolving the compound twice in MeOH then  $\text{CHCl}_3$ .



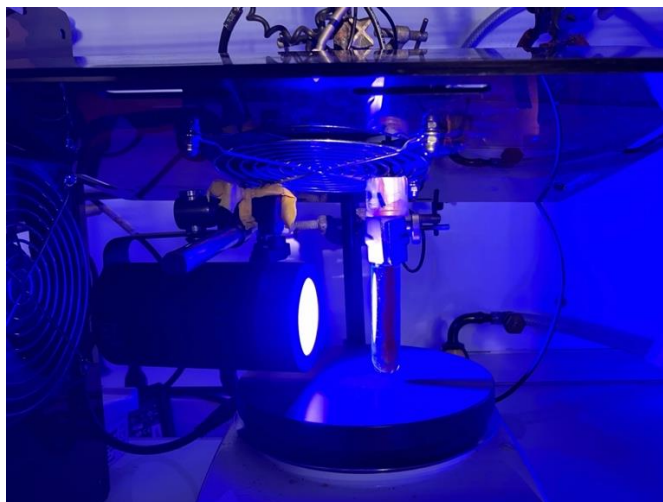

Figure 4: Set up used for the photocatalysis

## 7. Unsuccessful examples and rationalization of some low yields

Aliphatic aldehydes, aliphatic amines, benzylamine and benzenesulfonamide were found not to react properly in the reaction conditions as they lead to the formation of unstable imines at room temperature, which could undergo further condensations<sup>14</sup>.

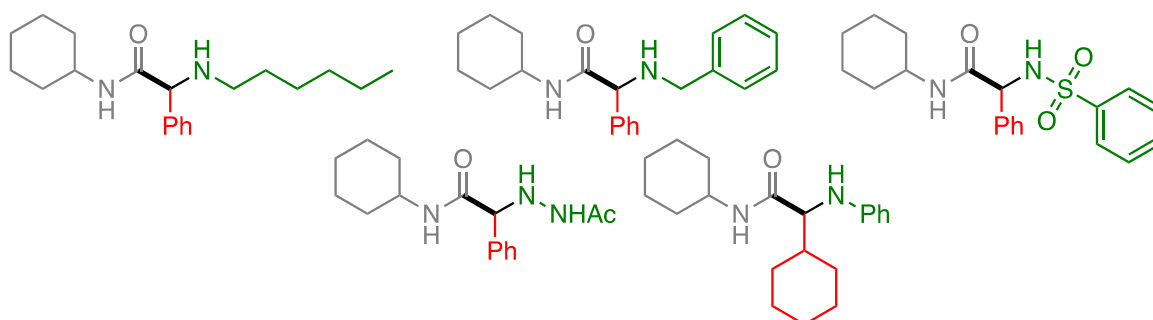

Figure 5: Unsuccessful examples

Lower yields were observed in several cases. For instance, compound **3y** bearing a *N,N*-dimethylamino substituent on the aromatic is prone to oxidation<sup>15</sup> and was only detected by <sup>1</sup>H NMR and not isolated. Low yield for **3s**, **3ag**, **3ak** highlight some complex electronic effects of diphenylimine substituents, which could influence the reaction at different steps: imine formation, imine reactivity toward the carbamoyl radical, and the stability of corresponding aminyl radical  $\nu^{13,16,17}$ . Notably, the *in-situ* generation of corresponding imine **2ag** is not easy under the reaction conditions, with a 49% yield reported in the literature after 7h at reflux in toluene<sup>18</sup>.

## 8. Characterization of products

### *N*-(Cyclohexyl)- $\alpha$ -(phenylamino)benzeneacetamide

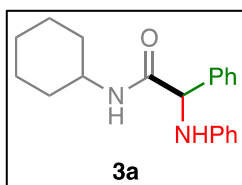

Following the general procedure C, **3a** was obtained from *N*-(cyclohexyl)oxamic acid (100 mg, 0.58 mmol, 1.0 eq.) and diphenylimine (100 mg, 0.58 mmol, 1.0 eq.) as a white solid (127 mg, 0.41 mmol, 70%) after purification by flash column chromatography on silica gel (Chex/EtOAc 95:5) (*R*<sub>f</sub> = 0.16, Chex/EtOAc 90:10).

Following the general procedure D, **3a** was obtained from *N*-(cyclohexyl)oxamic acid (100 mg, 0.58 mmol, 1.0 eq.), benzaldehyde (62 mg, 0.58 mmol, 1.0 eq.) and aniline (54 mg,

0.58 mmol, 1.0 eq.) as a white solid (119 mg, 0.39 mmol, 66%) after purification by flash column chromatography on silica gel (Chex/EtOAc 95:5) ( $R_f = 0.16$ , Chex/EtOAc 90:10).

$^1\text{H NMR}$  ( $\text{CDCl}_3$ , 300 MHz) :  $\delta_{\text{H}}$  7.43-7.35 (5H, m), 7.22-7.16 (2H, m), 6.83-6.78 (1H, m), 6.65-6.62 (2H, m), 6.58 (1H, br s), 4.70 (1H, s), 4.47 (1H, br s), 3.87-3.75 (1H, m), 1.91-1.77 (2H, m), 1.68-1.57 (3H, m), 1.38-1.26 (2H, m), 1.18-1.04 (3H, m).

$^{13}\text{C NMR}$  ( $\text{CDCl}_3$ , 75 MHz) :  $\delta_{\text{C}}$  170.1, 146.9, 139.2, 129.4, 129.3, 128.6, 127.5, 119.2, 114.0, 64.5, 48.2, 33.1, 32.9, 25.6, 24.9, 24.8.

FTIR (film, KBr):  $\nu$  ( $\text{cm}^{-1}$ ) = 3303, 3055, 2931, 2854, 1647, 1602, 1504, 1452, 1430, 1350, 1316, 1261, 749, 693.

HRMS (TOF/ESI<sup>+</sup>) Calculated for  $\text{C}_{20}\text{H}_{23}\text{ON}_2$  [ $\text{M}-\text{H}$ ]<sup>-</sup> 307.18159, found 307.18143.

m.p. 174-176°C (toluene).

### *N*-(Cyclopropyl)- $\alpha$ -(phenylamino)benzeneacetamide

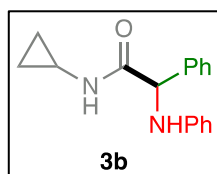

Following the general procedure C, **3b** was obtained from *N*-(cyclopropyl)oxamic acid (71 mg, 0.55 mmol, 1.0 eq.) and diphenylimine (100 mg, 0.55 mmol, 1.0 eq.) as a white solid (112 mg, 0.42 mmol, 72%) after purification by flash column chromatography on silica gel (Chex/EtOAc 85:15) ( $R_f = 0.15$ , Chex/EtOAc 80:20).

$^1\text{H NMR}$  ( $\text{CDCl}_3$ , 300 MHz) :  $\delta_{\text{H}}$  7.43-7.33 (5H, m), 7.21-7.16 (2H, m), 6.85 (1H, br s), 6.83-6.78 (1H, m), 6.63-6.60 (2H, m), 4.72 (1H, s), 4.58 (1H, br s), 2.76-2.68 (1H, m), 0.77-0.71 (2H, m), 0.46-0.42 (2H, m).

$^{13}\text{C NMR}$  ( $\text{CDCl}_3$ , 75 MHz) :  $\delta_{\text{C}}$  172.7, 146.7, 138.8, 129.4, 129.2, 128.6, 127.4, 119.1, 113.8, 64.0, 22.7, 6.7, 6.4.

FTIR (film, KBr):  $\nu$  ( $\text{cm}^{-1}$ ) = 3293, 3052, 3031, 2924, 2854, 1654, 1602, 1542, 1504, 1454, 1428, 1361, 1316, 1265, 1181, 1028, 750, 733, 694.

HRMS (TOF/ESI<sup>+</sup>) Calculated for  $\text{C}_{17}\text{H}_{17}\text{ON}_2$  [ $\text{M}-\text{H}$ ]<sup>-</sup> 265.13464, found 265.13443.

m.p. 136°C (toluene).

### *N*-(1,1,3,3-Tetramethylbutyl)- $\alpha$ -(phenylamino)benzeneacetamide

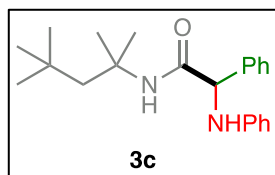

Following the general procedure C, **3c** was obtained from *N*-(1,1,3,3-tetramethylbutyl)oxamic acid (111 mg, 0.55 mmol, 1.0 eq.) and diphenylimine (100 mg, 0.55 mmol, 1.0 eq.) as a white solid (112 mg, 0.42 mmol, 72%) after purification by flash column chromatography on silica gel (Chex/EtOAc 98:2) ( $R_f = 0.22$ , Chex/EtOAc 95:5).

$^1\text{H NMR}$  ( $\text{CDCl}_3$ , 300 MHz) :  $\delta_{\text{H}}$  7.45-7.33 (5H, m), 7.20-7.14 (dd,  $J = 8.5$  Hz,  $J = 7.3$  Hz), 6.81-6.75 (1H, tt,  $J = 7.3$  Hz,  $J = 1.1$  Hz), 6.64-6.61 (2H, dd,  $J = 8.6$  Hz,  $J = 1.1$  Hz), 6.47 (1H, br s), 4.69 (1H, br s), 4.62 (1H, s), 1.63-1.60 (2H, d,  $J = 9.7$  Hz), 1.40-1.39 (6H, d,  $J = 3.5$  Hz), 0.87 (9H, s).

$^{13}\text{C NMR}$  ( $\text{CDCl}_3$ , 75 MHz) :  $\delta_{\text{C}}$  169.8, 146.9, 139.4, 129.3, 128.5, 127.4, 119.0, 114.0, 64.7, 55.4, 53.2, 31.6, 31.5, 28.8, 28.2.

FTIR (film, KBr):  $\nu$  ( $\text{cm}^{-1}$ ) = 3344, 3054, 3031, 2954, 2925, 2855, 1661, 1603, 1505, 1482, 1454, 1365, 1315, 1260, 1226, 749, 694.

HRMS (TOF/ESI<sup>+</sup>) Calculated for  $\text{C}_{22}\text{H}_{29}\text{ON}_2$  [ $\text{M}-\text{H}$ ]<sup>-</sup> 337.22654, found 337. 22861

m.p. 67°C (toluene)

### *N*-(2-Phenethyl)- $\alpha$ -(phenylamino)benzeneacetamide

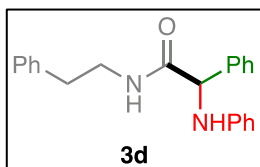

Following the general procedure C, **3d** was obtained from *N*-(2-phenethyl)oxamic acid (107 mg, 0.55 mmol, 1.0 eq.) and diphenylimine (100 mg, 0.55 mmol, 1.0 eq.) as a brown oil (145 mg, 0.44 mmol, 79%) after purification by flash column chromatography on silica gel (Chex/EtOAc 95:5 to 90:10) ( $R_f$  = 0.08, Chex/EtOAc 90:10).

$^1\text{H NMR}$  ( $\text{CDCl}_3$ , 300 MHz) :  $\delta_{\text{H}}$  7.36 (5H, s), 7.24-7.19 (5H, m), 7.02-7.19 (2H, m), 6.86-6.81 (1H, m), 6.76 (1H, br s), 6.64-6.62 (2H, m), 4.73 (1H, s), 4.57 (1H, br s), 3.68-3.43 (2H, m), 2.86-2.65 (2H, m).

$^{13}\text{C NMR}$  ( $\text{CDCl}_3$ , 75 MHz) :  $\delta_{\text{C}}$  171.1, 146.6, 138.8, 138.6, 129.3, 129.2, 128.8, 128.6, 128.5, 127.4, 126.4, 119.0, 113.8, 63.9, 40.6, 35.6.

**FTIR** (film, KBr):  $\nu$  ( $\text{cm}^{-1}$ ) = 3316, 3060, 3028, 2925, 2854, 1657, 1602, 1503, 1454, 1431, 1315, 1264, 750, 696.

**HRMS** (TOF/ESI-) Calculated for  $\text{C}_{22}\text{H}_{21}\text{ON}_2$  [ $\text{M}-\text{H}$ ] $^-$  329.16594, found 329.16592.

### *N*-(4-Methylbenzyl)- $\alpha$ -(phenylamino)benzeneacetamide

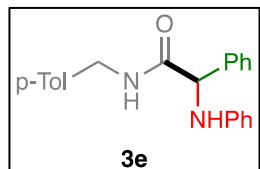

Following the general procedure C, **3e** was obtained from *N*-(4-methylbenzyl)oxamic acid (107 mg, 0.55 mmol, 1.0 eq.) and diphenylimine (100 mg, 0.55 mmol, 1.0 eq.) as a white solid (131 mg, 0.40 mmol, 72%) after purification by flash column chromatography on silica gel (Chex/EtOAc 95:5)

( $R_f$  = 0.12, Chex/EtOAc 90:10).

$^1\text{H NMR}$  ( $\text{CDCl}_3$ , 300 MHz) :  $\delta_{\text{H}}$  7.49-7.46 (2H, m), 7.44-7.39 (3H, m), 7.24-7.22 (2H, m), 7.12-7.04 (4H, m), 7.00 (1H, br s), 6.86-6.82 (1H, m), 6.68-6.65 (2H, m), 4.83 (1H, s), 4.60 (1H, br s), 4.57-4.50 (1H, dd,  $J$  = 14.8 Hz,  $J$  = 5.5 Hz), 4.39-4.33 (1H, dd,  $J$  = 14.8 Hz,  $J$  = 5.5 Hz), 2.34 (3H, s).

$^{13}\text{C NMR}$  ( $\text{CDCl}_3$ , 75 MHz) :  $\delta_{\text{C}}$  171.1, 146.6, 138.9, 137.2, 134.9, 129.4, 129.3, 129.3, 128.6, 127.6, 127.4, 119.2, 113.9, 64.2, 43.3, 21.1.

**FTIR** (film, KBr):  $\nu$  ( $\text{cm}^{-1}$ ) = 3307, 3052, 3028, 2924, 2854, 1654, 1602, 1504, 1454, 1429, 1316, 1264, 1180, 1028, 805, 749, 694.

**HRMS** (TOF/ESI-) Calculated for  $\text{C}_{22}\text{H}_{21}\text{ON}_2$  [ $\text{M}-\text{H}$ ] $^-$  329.16594, found 329.16599.

**m.p.** 128°C (toluene).

### *N*-(2-Methylthienyl)- $\alpha$ -(phenylamino)benzeneacetamide

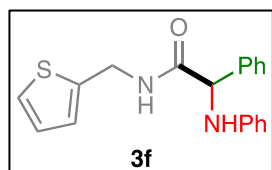

Following the general procedure C, **3f** was obtained from *N*-(2-methylthienyl)oxamic acid (102 mg, 0.55 mmol, 1.0 eq.) and diphenylimine (100 mg, 0.55 mmol, 1.0 eq.) as a white solid (98 mg, 0.30 mmol, 55%) after purification by flash column chromatography on silica gel (Chex/EtOAc 95:5)

( $R_f$  = 0.06, Chex/EtOAc 95:5).

$^1\text{H NMR}$  ( $\text{CDCl}_3$ , 300 MHz) :  $\delta_{\text{H}}$  7.46-7.36 (5H, m), 7.22-7.17 (4H, m), 6.92-6.89-6.80 (3H, m), 6.65-6.62 (2H, m), 4.80 (1H, s), 4.74-4.49 (3H, m).

$^{13}\text{C NMR}$  ( $\text{CDCl}_3$ , 75 MHz) :  $\delta_{\text{C}}$  171.1, 146.6, 140.7, 138.7, 129.4, 129.3, 128.7, 127.5, 126.9, 125.9, 125.2, 119.2, 113.9, 64.2, 38.4.

**FTIR** (film, KBr):  $\nu$  ( $\text{cm}^{-1}$ ) = 3374, 3308, 3055, 2924, 2854, 1657, 1602, 1504, 1454, 1428, 1316, 1265, 1225, 750, 694.

**HRMS** (TOF/ESI-) Calculated for  $\text{C}_{19}\text{H}_{17}\text{ON}_2\text{S}$  [ $\text{M}-\text{H}$ ] $^-$  321.10676, found 321.10660.

**m.p.** 136-138°C (toluene).

### *N*-((*S*)-Phenylalaninyl)- $\alpha$ -(phenylamino)benzeneacetamide

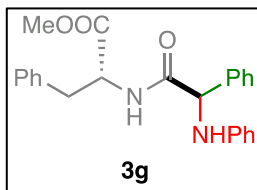

Following the general procedure C, **3g** was obtained from *N*-((*S*)-phenylalaninyl)oxamic acid (139 mg, 0.55 mmol, 1.0 eq.) and diphenylimine (100 mg, 0.55 mmol, 1.0 eq.) as a yellow solid (88 mg, 0.23 mmol, 40%) after purification by flash column chromatography on silica gel (Chex/EtOAc 90:10) ( $R_f$  = 0.08, Chex/EtOAc 90:10).

$^1\text{H NMR}$  ( $\text{CDCl}_3$ , 300 MHz) :  $\delta_{\text{H}}$  7.31-7.26 (5H, m), 7.21-7.16 (4H, m), 7.08-7.05 (3H, m), 6.83-6.78 (1H, m), 6.64-6.62 (2H, m), 4.92-4.85 (1H, m), 4.70 (1H, s), 4.41 (1H, br s), 3.64 (3H, s), 3.29-3.22 (1H, m), 3.04-2.97 (1H, m).

$^{13}\text{C NMR}$  ( $\text{CDCl}_3$ , 75 MHz) :  $\delta_{\text{C}}$  171.5, 171.2, 146.7, 138.4, 136.1, 129.4, 129.3, 129.3, 128.8, 128.7, 127.4, 127.2, 119.4, 114.3, 64.6, 53.2, 52.4, 37.7.

FTIR (film, KBr):  $\nu$  ( $\text{cm}^{-1}$ ) = 3369, 3059, 3030, 2924, 2853, 1742, 1663, 1602, 1503, 1454, 1435, 1362, 1315, 1261, 1214, 1179, 750, 697.

HRMS (TOF/ESI<sup>-</sup>) Calculated for  $\text{C}_{24}\text{H}_{23}\text{O}_3\text{N}_2$  [ $\text{M}-\text{H}$ ]<sup>-</sup> 387.17142, found 387.17108.

m.p. 137°C (toluene).

### *N*-(1-Piperidinyl)- $\alpha$ -(phenylamino)benzeneacetamide

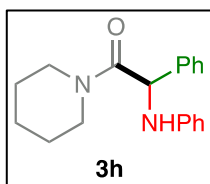

Following the general procedure C, **3h** was obtained from *N*-(1-piperidinyl)oxamic acid (87 mg, 0.55 mmol, 1.0 eq.) and diphenylimine (100 mg, 0.55 mmol, 1.0 eq.) as a beige solid (62 mg, 0.21 mmol, 38%) after purification by flash column chromatography on silica gel (Chex/EtOAc 95:5) ( $R_f$  = 0.09, Chex/EtOAc 95:5).

$^1\text{H NMR}$  ( $\text{CDCl}_3$ , 300 MHz) :  $\delta_{\text{H}}$  7.48-7.44 (2H, m), 7.36-7.32 (2H, m), 7.28-7.26 (1H, m), 7.15-7.09 (2H, m), 6.69-6.64 (3H, m), 3.68 (1H, m), 3.49-3.46 (3H, m), 1.57-1.40 (5H, m), 1.07-1.02 (1H, m).

$^{13}\text{C NMR}$  ( $\text{CDCl}_3$ , 75 MHz) :  $\delta_{\text{C}}$  169.0, 146.6, 139.0, 129.3, 129.0, 128.0, 127.8, 117.7, 113.6, 58.0, 46.6, 43.8, 25.9, 25.5, 24.5.

FTIR (film, KBr):  $\nu$  ( $\text{cm}^{-1}$ ) = 3380, 3025, 2925, 2854, 1639, 1602, 1581, 1499, 1455, 1424, 1316, 1256, 1178, 1130, 1119, 1013, 748, 710, 693.

HRMS (TOF/ESI<sup>+</sup>) Calculated for  $\text{C}_{19}\text{H}_{23}\text{ON}_2$  [ $\text{M}+\text{H}$ ]<sup>+</sup> 295.18049 found 295.18015

m.p. 165°C (toluene).

### *N*-(Phenyl)- $\alpha$ -(phenylamino)benzeneacetamide

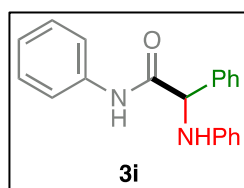

Following the general procedure C, **3i** was obtained from *N*-(phenyl)oxamic acid (91 mg, 0.55 mmol, 1.0 eq.) and diphenylimine (100 mg, 0.55 mmol, 1.0 eq.) as a beige solid (166 mg, 0.55 mmol, 99%) after purification by flash column chromatography on silica gel (Chex/EtOAc 95:5) ( $R_f$  = 0.25, Chex/EtOAc 90:10).

$^1\text{H NMR}$  ( $\text{CDCl}_3$ , 300 MHz) :  $\delta_{\text{H}}$  8.78 (1H, br s), 7.55-7.49 (4H, m), 7.44-7.37 (3H, m), 7.33-7.28 (2H, m), 7.26-7.21 (2H, m), 7.15-7.09 (1H, m), 6.90-6.85 (1H, m), 6.75-6.72 (2H, m), 4.85 (1H, s), 4.51 (1H, br s).

$^{13}\text{C NMR}$  ( $\text{CDCl}_3$ , 75 MHz) :  $\delta_{\text{C}}$  169.7, 146.6, 138.4, 137.4, 129.6, 129.5, 129.1, 128.9, 127.5, 124.7, 120.1, 119.9, 114.3, 65.5.

FTIR (film, KBr):  $\nu$  ( $\text{cm}^{-1}$ ) = 3321, 3204, 3141, 3055, 2882, 1669, 1601, 1516, 1505, 1496, 1443, 1315, 1265, 1246, 1177, 1157, 1128, 1078, 1030, 748, 693, 500.

HRMS (TOF/ESI<sup>-</sup>) Calculated for  $\text{C}_{20}\text{H}_{17}\text{ON}_2$  [ $\text{M}-\text{H}$ ]<sup>-</sup> 301.13464, found 301.13437

m.p. 136-139°C (toluene)

### *N*-(1-Naphtalenyl)- $\alpha$ -(phenylamino)benzeneacetamide

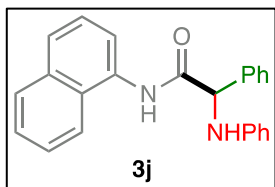

Following the general procedure C, **3j** was obtained from *N*-(1-naphtalenyl)oxamic acid (125 mg, 0.55 mmol, 1.0 eq.) and diphenylimine (100 mg, 0.55 mmol, 1.0 eq.) as a beige solid (166 mg, 0.55 mmol, 99%) after purification by flash column chromatography on silica gel (Chex/EtOAc 92:8) (R<sub>f</sub> = 0.15, Chex/EtOAc 90:10).

<sup>1</sup>H NMR (CDCl<sub>3</sub>, 300 MHz) :  $\delta$ <sub>H</sub> 9.27 (1H, s), 8.02-7.99 (1H, m), 7.85-7.82 (1H, m), 7.69-7.66 (1H, m), 7.62-7.58 (2H, m), 7.48-7.32 (7H, m), 7.27-7.24 (2H, m), 6.93-6.88 (1H, s), 6.85-6.81 (2H, m), 5.0 (1H, s), 4.69 (1H, br s).

<sup>13</sup>C NMR (CDCl<sub>3</sub>, 75 MHz) :  $\delta$ <sub>C</sub> 170.0, 146.5, 138.7, 134.1, 131.8, 129.7, 129.6, 129.0, 128.8, 127.7, 127.6, 127.0, 126.5, 126.1, 125.8, 120.3, 120.2, 120.1, 114.4, 65.4.

FTIR (film, KBr):  $\nu$  (cm<sup>-1</sup>) = 3299, 3052, 1662, 1601, 1503, 1454, 1431, 1399, 1347, 1315, 1266, 1180, 792, 770, 750, 694.

HRMS (TOF/ESI<sup>+</sup>) Calculated for C<sub>24</sub>H<sub>19</sub>ON<sub>2</sub> [M-H]<sup>-</sup> 351.15029, found 351.15015.

m.p. 173-175°C (toluene).

### *N*-(2-Methylphenyl)- $\alpha$ -(phenylamino)benzeneacetamide

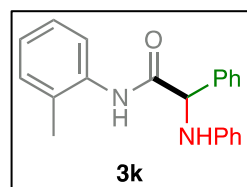

Following the general procedure C, **3k** was obtained from *N*-(2-methylphenyl)oxamic acid (99 mg, 0.55 mmol, 1.0 eq.) and diphenylimine (100 mg, 0.55 mmol, 1.0 eq.) as a beige solid (149 mg, 0.47 mmol, 85%) after purification by flash column chromatography on silica gel (Chex/EtOAc 95:5) (R<sub>f</sub> = 0.18, Chex/EtOAc 90:10).

<sup>1</sup>H NMR (CDCl<sub>3</sub>, 300 MHz) :  $\delta$ <sub>H</sub> 8.72 (1H, s), 7.93-7.90 (1H, m), 7.57-7.55 (2H, m), 7.44-7.42 (3H, m), 7.28-7.19 (3H, m), 7.16-7.14 (1H, m), 7.10-7.05 (1H, m), 6.91-6.86 (1H, m), 6.78-6.75 (2H, m), 4.91 (1H, s), 4.68 (1H, br s), 2.03 (3H, s).

<sup>13</sup>C NMR (CDCl<sub>3</sub>, 75 MHz) :  $\delta$ <sub>C</sub> 169.4, 146.5, 138.6, 135.2, 130.5, 129.5, 129.4, 128.9, 127.5, 126.8, 125.2, 122.4, 119.7, 114.2, 65.1, 17.3.

FTIR (film, KBr):  $\nu$  (cm<sup>-1</sup>) = 3329, 3053, 3030, 2923, 1667, 1603, 1588, 1503, 1455, 1430, 1314, 1260, 1180, 751, 694.

HRMS (TOF/ESI<sup>+</sup>) Calculated for C<sub>21</sub>H<sub>19</sub>ON<sub>2</sub> [M-H]<sup>-</sup> 315.15029, found 315.15005.

m.p. 92-94°C (toluene).

### *N*-(3,5-Dimethylphenyl)- $\alpha$ -(phenylamino)benzeneacetamide

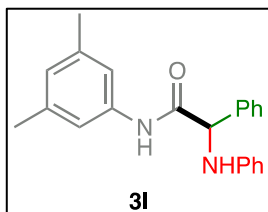

Following the general procedure C, **3l** was obtained from *N*-(3,5-dimethylphenyl)oxamic acid (107 mg, 0.55 mmol, 1.0 eq.) and diphenylimine (100 mg, 0.55 mmol, 1.0 eq.) as a beige solid (174 mg, 0.53 mmol, 95%) after purification by flash column chromatography on silica gel (Chex/EtOAc 95:5) (R<sub>f</sub> = 0.22, Chex/EtOAc 90:10).

<sup>1</sup>H NMR (CDCl<sub>3</sub>, 300 MHz) :  $\delta$ <sub>H</sub> 8.66 (1H, s), 7.52-7.49 (2H, m), 7.43-7.37 (3H, m), 7.26-7.21 (2H, m), 7.19 (2H, s), 6.90-6.85 (1H, m), 6.77 (1H, s), 6.74-6.71 (2H, m), 4.83 (1H, s), 4.50 (1H, br s), 2.28 (6H, s).

<sup>13</sup>C NMR (CDCl<sub>3</sub>, 75 MHz) :  $\delta$ <sub>C</sub> 169.5, 146.6, 138.8, 138.6, 137.2, 129.5, 129.4, 128.8, 127.4, 126.4, 119.8, 117.6, 114.2, 65.5, 21.3.

FTIR (film, KBr):  $\nu$  (cm<sup>-1</sup>) = 3315, 3052, 3030, 2919, 2858, 1664, 1602, 1538, 1496, 11454, 1427, 1317, 1265, 1215, 1181, 844, 750, 692, 508.

HRMS (TOF/ESI<sup>+</sup>) Calculated for C<sub>22</sub>H<sub>21</sub>ON<sub>2</sub> [M-H]<sup>-</sup> 329.16594, found 329.16589.

m.p. 116-118°C (toluene).

#### *N*-(4-Dimethoxyphenyl)- $\alpha$ -(phenylamino)benzeneacetamide

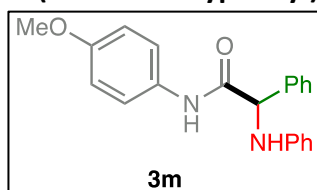

Following the general procedure C, **3m** was obtained from *N*-(4-dimethoxyphenyl)oxamic acid (108 mg, 0.55 mmol, 1.0 eq.) and diphenylimine (100 mg, 0.55 mmol, 1.0 eq.) as a beige solid (106 mg, 0.32 mmol, 58%) after purification by flash column chromatography on silica gel (Chex/EtOAc 95:5) ( $R_f$  = 0.09, Chex/EtOAc 90:10).

$^1\text{H NMR}$  ( $\text{CDCl}_3$ , 300 MHz) :  $\delta_{\text{H}}$  8.67 (1H, br s), 7.51-7.48 (2H, m), 7.43-7.36 (5H, m), 7.26-7.20 (2H, m), 6.89-6.81 (3H, m), 6.74-6.71 (2H, m), 4.84 (1H, s), 3.77 (3H, s).

$^{13}\text{C NMR}$  ( $\text{CDCl}_3$ , 75 MHz) :  $\delta_{\text{C}}$  169.5, 156.8, 146.6, 138.7, 130.5, 129.6, 129.4, 128.9, 127.5, 121.9, 119.8, 114.2, 114.2, 65.2, 55.6.

FTIR (film, KBr):  $\nu$  ( $\text{cm}^{-1}$ ) = 3316, 3054, 2956, 2933, 2836, 1662, 1602, 1511, 1464, 1454, 1441, 1413, 1314, 1301, 1245, 1174, 1032, 828, 797, 751, 895, 514.

HRMS (TOF/ESI $^-$ ) Calculated for  $\text{C}_{21}\text{H}_{19}\text{O}_2\text{N}_2$  [ $\text{M}-\text{H}$ ] $^-$  331.14410 found 331.14523.

m.p. 149°C (toluene).

#### *N*-(3-Dimethoxyphenyl)- $\alpha$ -(phenylamino)benzeneacetamide

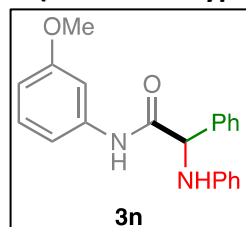

Following the general procedure C, **3n** was obtained from *N*-(3-dimethoxyphenyl)oxamic acid (108 mg, 0.55 mmol, 1.0 eq.) and diphenylimine (100 mg, 0.55 mmol, 1.0 eq.) as a beige solid (90 mg, 0.27 mmol, 49%) after purification by flash column chromatography on silica gel (Chex/EtOAc 95:5) ( $R_f$  = 0.15, Chex/EtOAc 90:10).

$^1\text{H NMR}$  ( $\text{CDCl}_3$ , 300 MHz) :  $\delta_{\text{H}}$  8.77 (1H, br s), 7.51-7.48 (2H, m), 7.44-7.34 (4H, m), 7.26-7.16 (3H, m), 6.99-6.96 (1H, m), 6.90-6.85 (1H, m), 6.74-6.71 (2H, m), 6.69-6.66 (1H, m), 4.83 (1H, s), 4.50 (1H, br s), 3.78 (3H, s).

$^{13}\text{C NMR}$  ( $\text{CDCl}_3$ , 75 MHz) :  $\delta_{\text{C}}$  169.7, 160.3, 146.5, 138.5, 129.8, 129.6, 129.5, 129.0, 127.5, 120.0, 114.3, 112.1, 110.8, 105.6, 65.6, 55.4.

FTIR (film, KBr):  $\nu$  ( $\text{cm}^{-1}$ ) = 3323, 3054, 2933, 2836, 1667, 1603, 1527, 1496, 1454, 1427, 1314, 1288, 1264, 1217, 1179, 1156, 1043, 858, 774, 751, 732, 692.

HRMS (TOF/ESI $^-$ ) Calculated for  $\text{C}_{21}\text{H}_{19}\text{O}_2\text{N}_2$  [ $\text{M}-\text{H}$ ] $^-$  331.14520, found 331.14496.

m.p. 127-129 °C (toluene).

#### *N*-(2-Dimethoxyphenyl)- $\alpha$ -(phenylamino)benzeneacetamide

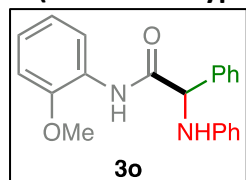

Following the general procedure C, **3o** was obtained from *N*-(2-dimethoxyphenyl)oxamic acid (108 mg, 0.55 mmol, 1.0 eq.) and diphenylimine (100 mg, 0.55 mmol, 1.0 eq.) as a beige solid (116 mg, 0.35 mmol, 63%) after purification by flash column chromatography on silica gel (Chex/EtOAc 95:5) ( $R_f$  = 0.24, Chex/EtOAc 90:10).

$^1\text{H NMR}$  ( $\text{CDCl}_3$ , 300 MHz) :  $\delta_{\text{H}}$  9.13 (1H, br s), 8.41-8.37 (1H, m), 7.57-7.53 (2H, m), 7.42-7.39 (3H, m), 7.24-7.19 (2H, m), 7.06-7.03 (1H, m), 7.00-6.97 (1H, m), 6.86-6.83 (2H, m), 6.75-6.72 (2H, m), 4.91 (1H, s), 4.70 (1H, br s), 3.73 (3H, s).

$^{13}\text{C NMR}$  ( $\text{CDCl}_3$ , 75 MHz) :  $\delta_{\text{C}}$  169.3, 148.5, 146.7, 138.8, 129.4, 129.4, 128.8, 127.6, 127.3, 124.3, 121.2, 120.0, 119.3, 114.2, 110.4, 65.7, 56.0.

FTIR (film, KBr):  $\nu$  ( $\text{cm}^{-1}$ ) = 3350, 3054, 3031, 2937, 2839, 1677, 1601, 1523, 1505, 1462, 1433, 1314, 1290, 1253, 1218, 1176, 1117, 1047, 1027, 750, 695.

HRMS (TOF/ESI $^-$ ) Calculated for  $\text{C}_{21}\text{H}_{19}\text{O}_2\text{N}_2$  [ $\text{M}-\text{H}$ ] $^-$  331.14520, found 331.14504.

m.p. 154°C (toluene).

### ***N*-(3-Trifluoromethylphenyl)- $\alpha$ -(phenylamino)benzeneacetamide**

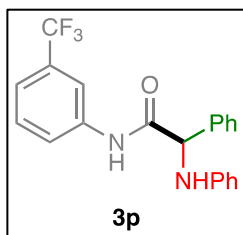

Following the general procedure C, **3p** was obtained from *N*-(3-trifluoromethylphenyl)oxamic acid (129 mg, 0.55 mmol, 1.0 eq.) and diphenylimine (100 mg, 0.55 mmol, 1.0 eq.) as an orange oil (203 mg, 0.55 mmol, 99%) after purification by flash column chromatography on silica gel (Chex/EtOAc 95:5) ( $R_f$  = 0.24, Chex/EtOAc 90:10).

$^1\text{H NMR}$  ( $\text{CDCl}_3$ , 300 MHz) :  $\delta_{\text{H}}$  8.99 (1H, br s), 7.86 (1H, s), 7.75-7.72 (1H, m), 7.51-7.48 (2H, m), 7.45-7.35 (5H, m), 7.28-7.23 (2H, m), 6.92-6.88 (1H, m), 6.75-6.73 (2H, m), 4.86 (1H, s), 4.50 (1H, br s).

$^{19}\text{F NMR}$  ( $\text{CDCl}_3$ , 272 MHz):  $\delta_{\text{F}}$  -62.7.

$^{13}\text{C NMR}$  ( $\text{CDCl}_3$ , 75 MHz) :  $\delta_{\text{C}}$  170.1, 146.4, 138.1, 137.8, 131.7 (q,  $J_{\text{C-F}}$  = 33 Hz), 129.7, 129.6, 129.5, 127.4, 123.8 (q,  $J_{\text{C-F}}$  = 272 Hz), 123.0, 121.2 (q,  $J_{\text{C-F}}$  = 3.5 Hz), 116.6 (q,  $J_{\text{C-F}}$  = 3.8 Hz), 114.3, 65.6.

**FTIR** (film, KBr):  $\nu$  ( $\text{cm}^{-1}$ ) = 3314, 3162, 3091, 3055, 2925, 1672, 1603, 1531, 1499, 1448, 1429, 1333, 1286, 1265, 1243, 1168, 1127, 1099, 1071, 918, 893, 794, 752, 738, 696.

**HRMS** (TOF/ESI $^-$ ) Calculated for  $\text{C}_{21}\text{H}_{26}\text{ON}_2\text{F}_3$  [M-H] $^-$  369.12202, found 369.12164.

### ***N*-(4-Trifluoromethylphenyl)- $\alpha$ -(phenylamino)benzeneacetamide**

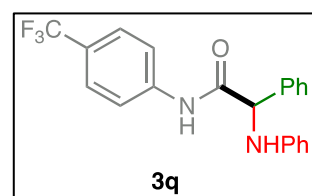

Following the general procedure C, **3q** was obtained from *N*-(4-trifluoromethylphenyl)oxamic acid (129 mg, 0.55 mmol, 1.0 eq.) and diphenylimine (100 mg, 0.55 mmol, 1.0 eq.) as a white powder (160 mg, 0.43 mmol, 78%) after purification by flash column chromatography on silica gel (Chex/EtOAc 95:5) ( $R_f$  = 0.24, Chex/EtOAc 90:10).

$^1\text{H NMR}$  ( $\text{CDCl}_3$ , 300 MHz) :  $\delta_{\text{H}}$  9.01 (1H, br s), 7.68-7.65 (2H, m), 7.56-7.54 (2H, m), 7.51-7.48 (2H, m), 7.42-7.40 (3H, m), 7.28-7.23 (2H, m), 6.93-6.88 (1H, m), 6.75-6.72 (2H, m), 4.86 (1H, s), 4.49 (1H, br s).

$^{19}\text{F NMR}$  ( $\text{CDCl}_3$ , 272 MHz):  $\delta_{\text{F}}$  -62.1.

$^{13}\text{C NMR}$  ( $\text{CDCl}_3$ , 75 MHz) :  $\delta_{\text{C}}$  170.3, 146.4, 140.4 (d,  $J_{\text{C-F}}$  = 1.4 Hz), 138.1, 129.7, 129.6, 129.2, 127.4, 126.5 (q,  $J_{\text{C-F}}$  = 33 Hz), 126.4 (q,  $J_{\text{C-F}}$  = 3.7 Hz), 124.1 (q,  $J_{\text{C-F}}$  = 272 Hz), 120.3, 119.7, 114.3, 65.7.

**FTIR** (film, KBr):  $\nu$  ( $\text{cm}^{-1}$ ) = 3312, 3056, 3033, 2883, 1913, 1675, 1604, 1526, 1504, 1455, 1410, 1324, 1260, 1166, 1119, 1068, 1018, 840, 752, 738, 695, 507.

**HRMS** (TOF/ESI $^-$ ) Calculated for  $\text{C}_{21}\text{H}_{16}\text{ON}_2\text{F}_3$  [M-H] $^-$  369.12202, found 369.12177.

m.p. 161°C (toluene).

### **Ethyl 4-[[2-phenyl-2-(phenylamino)acetyl]amino]benzoate**

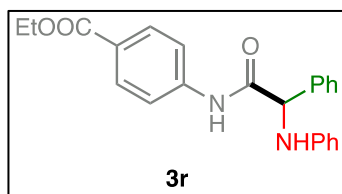

Following the general procedure C, **3r** was obtained from 1-ethyl 4-[(carboxycarbonyl)amino]benzoate (131 mg, 0.55 mmol, 1.0 eq.) and diphenylimine (100 mg, 0.55 mmol, 1.0 eq.) as a white foam (133 mg, 0.35 mmol, 64%) after purification by flash column chromatography on silica gel (Chex/EtOAc 90:10) ( $R_f$  = 0.13, Chex/EtOAc 90:10).

$^1\text{H NMR}$  ( $\text{CDCl}_3$ , 300 MHz) :  $\delta_{\text{H}}$  9.00 (1H, br s), 8.00-7.97 (2H, m), 7.63-7.60 (2H, m), 7.48-7.47 (2H, m), 7.47-7.38 (3H, m), 7.26-7.21 (2H, m), 6.90-6.85 (1H, m), 6.74-6.71 (2H, m), 4.86 (1H, s), 4.51 (1H, br s), 4.38-4.31 (2H, q,  $J$  = 7.5 Hz), 1.40-1.36 (3H, t,  $J$  = 7.5 Hz).

$^{13}\text{C NMR}$  ( $\text{CDCl}_3$ , 75 MHz) :  $\delta_{\text{C}}$  170.2, 166.2, 146.4, 141.4, 138.2, 130.8, 129.7, 129.5, 129.1, 127.5, 126.4, 120.2, 119.2, 114.3, 65.6, 61.0, 14.4.

**FTIR (film, KBr):**  $\nu$  ( $\text{cm}^{-1}$ ) = 3321, 3055, 2983, 2903, 1697, 1602, 1519, 1492, 1454, 1430, 1408, 1368, 1311, 1280, 1174, 1108, 1020, 857, 770, 751, 736, 694.

**HRMS (TOF/ESI<sup>-</sup>)** Calculated for  $\text{C}_{23}\text{H}_{21}\text{O}_3\text{N}_2$   $[\text{M}-\text{H}]^-$  373.15577, found 373.15549.

**m.p.** 173-175°C (toluene).

### ***N*-(3,5-dimethylphenyl)- $\alpha$ -(4-trifluoromethylphenylamino)-4-methoxyphenylacetamide**

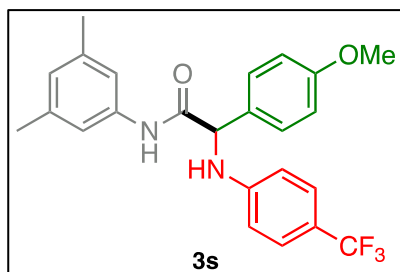

Following the general procedure C, **3s** was obtained from *N*-(3,5-dimethylphenyl)oxamic acid (100 mg, 0.52 mmol, 1.0 eq.) and **2s** (152 mg, 0.52 mmol, 1.0 eq.) as a white solid (30 mg, 0.07 mmol, 18%) after purification by flash column chromatography on silica gel (Chex/EtOAc 95:5) ( $R_f$  = 0.15, Chex/EtOAc 90:10).

Following the general procedure D, **3s** was obtained from *N*-(3,5-dimethylphenyl)oxamic acid (100 mg, 0.52 mmol, 1.0 eq.), anisaldehyde (71 mg, 0.52 mmol, 1.0 eq.) and (4-trifluoromethyl)aniline (83 mg, 0.52 mmol, 1.0 eq.) as a white solid (85 mg, 0.20 mmol, 38%) after purification by flash column chromatography on silica gel (Chex/EtOAc 90:10) ( $R_f$  = 0.19, Chex/EtOAc 85:15).

**<sup>1</sup>H NMR (CDCl<sub>3</sub>, 300 MHz):**  $\delta_H$  8.19 (1H, s), 7.42-7.39 (4H, m), 7.12 (2H, s), 6.94-6.89 (2H, m), 6.77 (1H, s), 6.68-6.65 (2H, m), 5.10 (1H, br s), 4.84 (1H, s), 3.79 (3H, s), 2.26 (6H, s).

**<sup>19</sup>F NMR (CDCl<sub>3</sub>, 272 MHz):**  $\delta_F$  -61.3.

**<sup>13</sup>C NMR (CDCl<sub>3</sub>, 75 MHz):**  $\delta_C$  169.2, 160.2, 149.0, 139.0, 137.0, 130.0, 128.6, 126.9 (q,  $J_{C-F}$  = 3.8 Hz), 126.8, 120.9 (q,  $J_{C-F}$  = 33 Hz), 120.4 ( $J_{C-F}$  = 271 Hz), 117.9, 115.0, 113.4, 63.4, 55.5, 21.4.

**FTIR (film, KBr):**  $\nu$  ( $\text{cm}^{-1}$ ) = 3296, 3009, 2957, 2920, 2855, 1661, 1616, 1532, 1513, 1464, 1443, 1323, 1255, 1185, 1162, 1112, 1066, 1034, 827.

**HRMS (TOF/ESI<sup>+</sup>)** Calculated for  $\text{C}_{24}\text{H}_{24}\text{O}_2\text{N}_2\text{F}_3$   $[\text{M}+\text{H}]^+$  429.17844 found 429.17905.

**m.p.** 114-116°C.

### ***N*-(phenyl)- $\alpha$ -(4-cyanophenylamino)-3-fluorophenylacetamide**

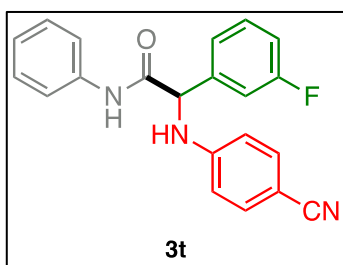

Following the general procedure C, **3t** was obtained from *N*-(phenyl)oxamic acid (90 mg, 0.54 mmol, 1.0 eq.) and *N*-[(3-fluoro)phenylmethylene]-4-(cyano)benzenamine (120 mg, 0.54 mmol, 1.0 eq.) as a white solid (78 mg, 0.23 mmol, 41%) after purification by flash column chromatography on silica gel (Chex/EtOAc 87:13) ( $R_f$  = 0.18, Chex/EtOAc 80:20).

Following the general procedure D, **3a** was obtained from *N*-(phenyl)oxamic acid (90 mg, 0.54 mmol, 1.0 eq.), 3-fluorobenzaldehyde (68 mg, 0.54 mmol, 1.0 eq.) and (4-cyano)aniline (64 mg, 0.54 mmol, 1.0 eq.) as a white solid (50 mg, 0.15 mmol, 27%) after purification by flash column chromatography on silica gel (Chex/EtOAc 90:10 to 80:20) ( $R_f$  = 0.10, Chex/EtOAc 85:15).

**<sup>1</sup>H NMR (CDCl<sub>3</sub>, 300 MHz):**  $\delta_H$  8.07 (1H, m), 7.47-7.22 (9H, m), 7.16-7.11 (1H, m), 7.09-7.04 (1H, m), 6.60-6.57 (2H, m), 5.62 (1H, br s), 4.98 (1H, s).

**<sup>19</sup>F NMR (CDCl<sub>3</sub>, 272 MHz):**  $\delta_F$  -110.4.

**<sup>13</sup>C NMR (CDCl<sub>3</sub>, 75 MHz):**  $\delta_C$  167.1, 163.4 (d,  $J_{C-F}$  = 249 Hz), 149.3, 140.1 (d,  $J_{C-F}$  = 6.8 Hz), 136.9, 133.9, 131.4 (d,  $J_{C-F}$  = 8.3 Hz), 125.4, 123.0 (d,  $J_{C-F}$  = 3.1 Hz), 120.3, 120.2, 116.4 (d,  $J_{C-F}$  = 21 Hz), 114.3 (d,  $J_{C-F}$  = 22 Hz), 113.6, 100.7, 62.1 (d,  $J_{C-F}$  = 1.7 Hz).



**FTIR (film, KBr):**  $\nu$  ( $\text{cm}^{-1}$ ) = 3329, 3143, 3061, 2216, 1672, 1606, 1520, 1499, 1487, 1445, 1420, 1333, 1317, 1254, 1175, 1148, 825, 754, 738, 690.

**HRMS (TOF/ESI<sup>+</sup>)** Calculated for  $\text{C}_{21}\text{H}_{17}\text{ON}_3\text{F}$   $[\text{M}+\text{H}]^+$  346.13502 found 346.13528.

**m.p.** 166-168°C (toluene).

### Methyl-4-[2-(cyclopropylamino)-1-(3,4-bromophenylamino)]-2-oxoethyl]benzoate

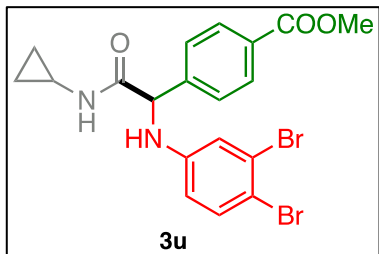

Following the general procedure C, **3u** was obtained from *N*-(cyclopropyl)oxamic acid (75 mg, 0.58 mmol, 1.0 eq.) and methyl **2u** (229 mg, 0.58 mmol, 1.0 eq.) as a white solid (164 mg, 0.23 mmol, 58%) after purification by flash column chromatography on silica gel (Chex/EtOAc 80:20) ( $R_f$  = 0.09, Chex/EtOAc 80:20).

Following the general procedure D, **3u** was obtained from (cyclopropyl)oxamic acid (75 mg, 0.58 mmol, 1.0 eq.), methyl 4-formylbenzoate (95 mg, 0.58 mmol, 1.0 eq.) and (3,4-dibromo)aniline (146 mg, 0.58 mmol, 1.0 eq.) as a white solid (127 mg, 0.34 mmol, 45%) after purification by flash column chromatography on silica gel (Chex/EtOAc 90:10 to 80:20) ( $R_f$  = 0.09, Chex/EtOAc 80:20).

**<sup>1</sup>H NMR (CDCl<sub>3</sub>, 300 MHz):**  $\delta_{\text{H}}$  8.04-8.02 (2H, m), 7.49-7.46 (2H, m), 7.31-7.26 (1H, m), 6.83-6.82 (1H, m), 6.39-6.36 (1H, m), 6.30 (1H, br s), 4.73 (1H, s), 3.91 (3H, s), 2.70-2.64 (1H, m), 0.77-0.74 (2H, m), 0.43-0.42 (2H, m).

**<sup>13</sup>C NMR (CDCl<sub>3</sub>, 75 MHz):**  $\delta_{\text{C}}$  170.8, 166.5, 145.7, 142.7, 133.9, 130.8, 130.8, 127.4, 125.3, 118.9, 114.8, 113.4, 62.7, 52.4, 23.1, 6.9, 6.7.

**FTIR (film, KBr):**  $\nu$  ( $\text{cm}^{-1}$ ) = 3336, 3058, 3009, 2952, 2924, 2851, 1718, 1660, 1591, 1488, 1466, 1436, 1311, 1284, 1192, 1113, 1020, 738, 705.

**HRMS (TOF/ESI<sup>+</sup>)** Calculated for  $\text{C}_{19}\text{H}_{19}\text{O}_3\text{N}_2\text{Br}_2$   $[\text{M}+\text{H}]^+$  480.97569 found 480.97620.

**m.p.** 163°C (toluene).

### Ethyl 4-[[2-(4-methylbenzylamino)-1-(4-cyanophenyl)-2-oxoethyl]amino]benzoate

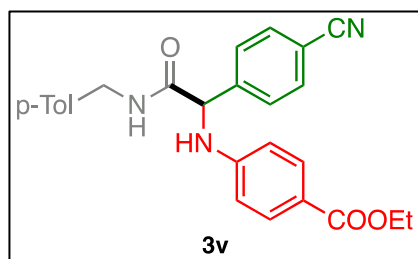

Following the general procedure C, **3v** was obtained from *N*-(4-methylbenzyl)oxamic acid (100 mg, 0.52 mmol, 1.0 eq.) and ethyl 4-[[4-(4-cyanophenyl)methylene]amino]benzoate (144 mg, 0.52 mmol, 1.0 eq.) as a white solid (141 mg, 0.33 mmol, 64%) after purification by flash column chromatography on silica gel (Chex/EtOAc 90:10 to 80:20) ( $R_f$  = 0.26, Chex/EtOAc 80:20).

Following the general procedure D, **3v** was obtained from **2v** (100 mg, 0.52 mmol, 1.0 eq.), 4-cyanobenzaldehyde (68 mg, 0.52 mmol, 1.0 eq.) and benzocaine (86 mg, 0.52 mmol, 1.0 eq.) as a white solid (137 mg, 0.32 mmol, 62%) after purification by flash column chromatography on silica gel (Chex/EtOAc 95:5 to 80:20) ( $R_f$  = 0.26, Chex/EtOAc 80:20).

**<sup>1</sup>H NMR (CDCl<sub>3</sub>, 300 MHz):**  $\delta_{\text{H}}$  7.83-7.80 (2H, m), 7.67-7.64 (2H, m), 7.58-7.56 (2H, m), 7.10-7.07 (2H, m), 7.01-6.98 (2H, m), 6.53-6.49 (2H, m), 6.47 (1H, s), 5.44-5.42 (1H, d,  $J$  = 4.0 Hz), 4.96-4.95 (1H, d,  $J$  = 3.2 Hz), 4.48-4.30 (2H, m), 4.30-4.23 (2H, q,  $J$  = 7.1 Hz), 2.31 (3H, s), 1.35-1.31 (3H, t,  $J$  = 7.1 Hz).

**<sup>13</sup>C NMR (CDCl<sub>3</sub>, 75 MHz):**  $\delta_{\text{C}}$  169.0, 166.7, 149.4, 143.8, 137.8, 134.3, 133.2, 131.6, 129.6, 128.1, 127.7, 120.8, 118.4, 112.8, 62.1, 60.6, 43.9, 21.2, 14.5

**FTIR (film, KBr):**  $\nu$  ( $\text{cm}^{-1}$ ) = 3333, 3056, 2982, 2925, 2873, 2231, 1671, 1605, 1524, 1472, 1418, 1367, 1334, 1313, 1280, 1175, 1108, 1021, 840, 806, 771, 736, 700.

**HRMS (TOF/ESI<sup>+</sup>)** Calculated for  $\text{C}_{26}\text{H}_{26}\text{O}_3\text{N}_3$   $[\text{M}+\text{H}]^+$  428.19687 found 428.19745.

**m.p.** 197°C (toluene).

### ***N*-(cyclohexyl)- $\alpha$ -(phenylamino)-4-fluorobenzeneacetamide**

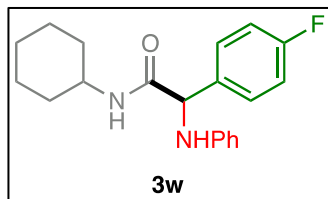

Following the general procedure D, **3w** was obtained from *N*-(cyclohexyl)oxamic acid (100 mg, 0.58 mmol, 1.0 eq.), 4-fluorobenzaldehyde (73 mg, 0.58 mmol, 1.0 eq.) and aniline (54 mg, 0.58 mmol, 1.0 eq.) as a white solid (139 mg, 0.42 mmol, 73%) after purification by flash column chromatography on silica gel (Chex/EtOAc

95:5) ( $R_f$  = 0.16, Chex/EtOAc 90:10).

**<sup>1</sup>H NMR (CDCl<sub>3</sub>, 300 MHz):**  $\delta_H$  7.43-7.38 (2H, m), 7.22-7.17 (2H, m), 7.09-7.03 (2H, m), 6.84-6.79 (1H, m), 6.64-6.61 (2H, m), 6.58 (1H, br s), 4.69 (1H, s), 4.46 (1H, br s), 3.85-3.75 (1H, m), 1.90-1.77 (2H, m), 1.70-1.59 (3H, m), 1.37-1.29 (2H, m), 1.17-1.00 (3H, m).

**<sup>19</sup>F NMR (CDCl<sub>3</sub>, 272 MHz):**  $\delta_F$  -113.3.

**<sup>13</sup>C NMR (CDCl<sub>3</sub>, 75 MHz):**  $\delta_C$  169.9, 162.8 (d,  $J_{C-F}$  = 248 Hz), 146.6, 135.0 (d,  $J_{C-F}$  = 3.3 Hz), 129.4, 129.2 (d,  $J_{C-F}$  = 8.3 Hz), 119.4, 116.2 (d,  $J_{C-F}$  = 21.6 Hz), 114.0, 63.7, 48.3, 33.1, 32.9, 25.5, 24.9, 24.7.

**FTIR (film, KBr):**  $\nu$  ( $\text{cm}^{-1}$ ) = 3306, 3054, 2930, 2885, 1658, 1652, 1648, 1604, 1506, 1451, 1433, 1316, 1263, 1227, 1157, 1094, 841, 804, 750, 692.

**HRMS (TOF/ESI<sup>+</sup>)** Calculated for  $\text{C}_{20}\text{H}_{24}\text{ON}_2\text{F}$   $[\text{M}+\text{H}]^+$  327.18672 found 327.18644.

**HRMS (TOF/ESI<sup>+</sup>)** Calculated for  $\text{C}_{20}\text{H}_{23}\text{ON}_2\text{FNa}$   $[\text{M}+\text{Na}]^+$  349.16866 found 349.16840.

**m.p.** 112-114°C (toluene).

### **Methyl-4-[2-(cyclohexylamino)-1-(phenylamino)]-2-oxoethyl]benzoate**

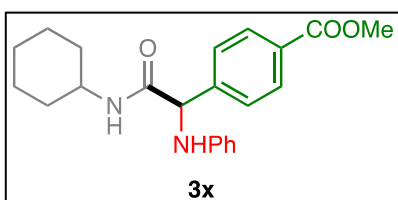

Following the general procedure D, **3x** was obtained from *N*-(cyclohexyl)oxamic acid (100 mg, 0.58 mmol, 1.0 eq.), methyl 4-formylbenzoate (96 mg, 0.58 mmol, 1.0 eq.) and aniline (54 mg, 0.58 mmol, 1.0 eq.) as a white powder (134 mg, 0.37 mmol, 63%) after purification by flash column chromatography on silica gel

(Chex/EtOAc 90:10) ( $R_f$  = 0.08, Chex/EtOAc 80:20).

**<sup>1</sup>H NMR (CDCl<sub>3</sub>, 300 MHz):**  $\delta_H$  8.05-8.02 (2H, m), 7.53-7.50 (2H, m), 7.18-7.15 (2H, m), 6.82-6.77 (1H, m), 6.63-6.60 (2H, m), 6.54-6.52 (1H, m), 4.77 (1H, s), 4.59 (1H, s), 3.91 (3H, s), 3.84-3.73 (1H, m), 1.89-1.85 (2H, m), 1.69-1.55 (3H, m), 1.40-1.24 (2H, m), 1.20-0.96 (3H, m).

**<sup>13</sup>C NMR (CDCl<sub>3</sub>, 75 MHz):**  $\delta_C$  169.4, 167.7, 146.5, 144.1, 130.6, 130.4, 129.5, 127.5, 119.4, 114.0, 64.0, 52.3, 48.4, 33.0, 32.8, 25.5, 24.8, 24.7.

**FTIR (film, KBr):**  $\nu$  ( $\text{cm}^{-1}$ ) = 3327, 3053, 2928, 2854, 1723, 1650, 1603, 1505, 1450, 1435, 1349, 1314, 1283, 1112, 748, 693.

**HRMS (TOF/ESI<sup>+</sup>)** Calculated for  $\text{C}_{22}\text{H}_{27}\text{O}_3\text{N}_2$   $[\text{M}+\text{H}]^+$  367.20162 found 367.20143.

**HRMS (TOF/ESI<sup>+</sup>)** Calculated for  $\text{C}_{22}\text{H}_{26}\text{O}_3\text{N}_2\text{Na}$   $[\text{M}+\text{Na}]^+$  389.18356 found 389.18324.

**m.p.** 177°C (toluene).

### ***N*-(cyclohexyl)- $\alpha$ -(phenylamino)-4-dimethylaminobenzeneacetamide**

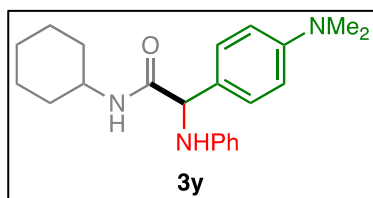

Following the general procedure D, **3y** was obtained from *N*-(cyclohexyl)oxamic acid (100 mg, 0.58 mmol, 1.0 eq.), 4-(dimethylamino)benzaldehyde (87 mg, 0.58 mmol, 1.0 eq.) and aniline (54 mg, 0.58 mmol, 1.0 eq.). Crude NMR (7%) was obtained adding mesitylene as an external standard (42.6 mg, 0.61 eq.).

#### *N*-(cyclohexyl)- $\alpha$ -(phenylamino)-4-cyanobenzeneacetamide

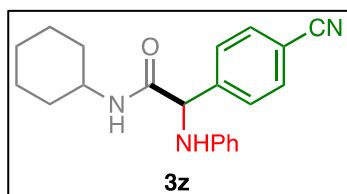

Following the general procedure D, **3z** was obtained from *N*-(cyclohexyl)oxamic acid (100 mg, 0.58 mmol, 1.0 eq.), 4-cyanobenzaldehyde (77 mg, 0.58 mmol, 1.0 eq.) and aniline (54 mg, 0.58 mmol, 1.0 eq.) as a white powder (127 mg, 0.38 mmol, 65%) after purification by flash column chromatography on silica gel (Chex/EtOAc

93:7) ( $R_f$  = 0.06, Chex/EtOAc 90:10).

$^1\text{H NMR}$  ( $\text{CDCl}_3$ , 300 MHz) :  $\delta_{\text{H}}$  7.67-7.64 (2H, m), 7.58-7.55 (2H, m), 7.21-7.16 (2H, m), 6.84-6.79 (1H, m), 6.61-6.59 (2H, m), 6.53-6.50 (1H, m), 4.78 (1H, s), 4.57 (1H, br s), 1.90-1.85 (2H, m), 1.70-1.58 (3H, m), 1.40-1.25 (2H, m), 1.21-0.96 (3H, m).

$^{13}\text{C NMR}$  ( $\text{CDCl}_3$ , 75 MHz) :  $\delta_{\text{C}}$  168.9, 146.1, 144.4, 133.0, 129.5, 128.2, 119.7, 118.5, 114.0, 112.5, 63.8, 48.6, 33.1, 32.8, 25.5, 24.8, 24.7.

FTIR (film, KBr):  $\nu$  ( $\text{cm}^{-1}$ ) = 3327, 3054, 2930, 2854, 2230, 1650, 1603, 1504, 1451, 1433, 1350, 1317, 1261, 750, 692.

HRMS (TOF/ESI<sup>+</sup>) Calculated for  $\text{C}_{21}\text{H}_{24}\text{ON}_3$  [ $\text{M}+\text{H}$ ]<sup>+</sup> 334.19139 found 334.19111.

HRMS (TOF/ESI<sup>+</sup>) Calculated for  $\text{C}_{21}\text{H}_{23}\text{ON}_3\text{Na}$  [ $\text{M}+\text{Na}$ ]<sup>+</sup> 356.17333 found 356.17308.

m.p. 174-176°C.

#### *N*-(cyclohexyl)- $\alpha$ -(phenylamino)-4-methoxybenzeneacetamide

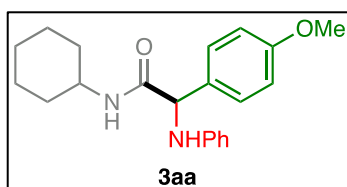

Following the general procedure D, **3aa** was obtained from *N*-(cyclohexyl)oxamic acid (100 mg, 0.58 mmol, 1.0 eq.), anisaldehyde (80 mg, 0.58 mmol, 1.0 eq.) and aniline (54 mg, 0.58 mmol, 1.0 eq.) as a white powder (138 mg, 41 mmol, 70%) after purification by flash column chromatography on silica gel (Chex/EtOAc 90:10) ( $R_f$  = 0.09, Chex/EtOAc 90:10).

$^1\text{H NMR}$  ( $\text{CDCl}_3$ , 300 MHz) :  $\delta_{\text{H}}$  7.35-7.32 (2H, m), 7.21-7.16 (2H, m), 6.91-6.88 (2H, m), 6.82-6.77 (1H, m), 6.64-6.61 (3H, m), 4.65 (1H, s), 4.42 (1H, br s), 3.80 (4H, s), 1.91-1.77 (2H, m), 1.70-1.65 (3H, m), 1.37-1.29 (2H, m), 1.17-1.00 (3H, m).

$^{13}\text{C NMR}$  ( $\text{CDCl}_3$ , 75 MHz) :  $\delta_{\text{C}}$  170.4, 159.8, 146.9, 131.2, 129.4, 128.7, 119.2, 114.6, 114.0, 63.9, 55.4, 48.2, 33.1, 32.9, 25.5, 24.9, 24.8.

FTIR (film, KBr):  $\nu$  ( $\text{cm}^{-1}$ ) = 3304, 3052, 3001, 2927, 2853, 1648, 1604, 1510, 1464, 1451, 1315, 1305, 1250, 1178, 1033, 749, 692.

HRMS (TOF/ESI<sup>+</sup>) Calculated for  $\text{C}_{21}\text{H}_{27}\text{O}_2\text{N}_2$  [ $\text{M}+\text{H}$ ]<sup>+</sup> 331.20671 found 339.20655.

HRMS (TOF/ESI<sup>+</sup>) Calculated for  $\text{C}_{21}\text{H}_{26}\text{O}_2\text{N}_2\text{Na}$  [ $\text{M}+\text{Na}$ ]<sup>+</sup> 361.18865 found 361.18834.

m.p. 162°C (toluene).

#### *N*-(cyclohexyl)- $\alpha$ -(phenylamino)-4-fluorobenzeneacetamide

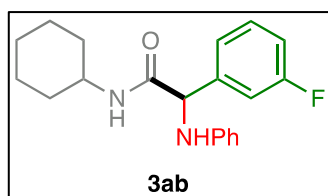

Following the general procedure D, **3ab** was obtained from *N*-(cyclohexyl)oxamic acid (100 mg, 0.58 mmol, 1.0 eq.), 3-fluorobenzaldehyde (73 mg, 0.58 mmol, 1.0 eq.) and aniline (54 mg, 0.58 mmol, 1.0 eq.) as a white powder (130 mg, 39 mmol, 68%) after purification by flash column chromatography on silica gel (Chex/EtOAc 93:3) ( $R_f$  = 0.16, Chex/EtOAc 90:10).

**$^1\text{H}$  NMR (CDCl<sub>3</sub>, 300 MHz)** :  $\delta_{\text{H}}$  7.36-7.31 (1H, m), 7.24-7.13 (4H, m), 7.06-7.03 (1H, m), 6.84-6.78 (1H, m), 6.64-6.60 (2H, m), 6.56-6.53 (1H, m), 4.71 (1H, s), 4.53 (1H, br s), 3.86-3.73 (1H, m), 1.92-1.77 (2H, m), 1.70-1.57 (3H, m), 1.42-1.26 (2H, m), 1.21-0.96 (3H, m).

**$^{19}\text{F}$  NMR (CDCl<sub>3</sub>, 272 MHz)**:  $\delta_{\text{F}}$  -111.5.

**$^{13}\text{C}$  NMR (CDCl<sub>3</sub>, 75 MHz)** :  $\delta_{\text{C}}$  169.5, 163.2 (d,  $J_{\text{C-F}}$  = 248 Hz), 146.5, 141.6 (d,  $J_{\text{C-F}}$  = 8 Hz), 130.9 (d,  $J_{\text{C-F}}$  = 8 Hz), 129.4, 123.2, 119.3, 115.6 (d,  $J_{\text{C-F}}$  = 21 Hz), 114.4 (d,  $J_{\text{C-F}}$  = 22 Hz), 114.0, 63.8, 48.4, 33.0, 32.8, 25.5, 24.9, 24.7.

**FTIR (film, KBr)**:  $\nu$  (cm<sup>-1</sup>) = 3304, 3055, 2926, 2854, 1652, 1646, 1603, 1505, 1488, 1449, 1350, 1317, 1253, 1153, 781, 748, 691, 1650, 1603, 1505, 1450, 1435, 1349, 1314, 1283, 1112, 748, 693.

**HRMS (TOF/ESI<sup>+</sup>)** Calculated for C<sub>20</sub>H<sub>24</sub>ON<sub>2</sub>F [M+H]<sup>+</sup> 327.18672 found 327.18642.

**HRMS (TOF/ESI<sup>+</sup>)** Calculated for C<sub>20</sub>H<sub>23</sub>ON<sub>2</sub>FNa [M+Na]<sup>+</sup> 349.16866 found 349.16840.

**m.p.** 187°C (toluene).

#### *N*-(cyclohexyl)- $\alpha$ -(phenylamino)-3-methylbenzeneacetamide

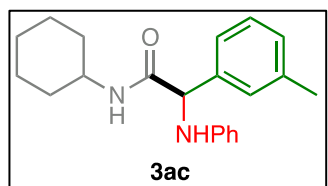

Following the general procedure D, **3ac** was obtained from *N*-(cyclohexyl)oxamic acid (100 mg, 0.58 mmol, 1.0 eq.), 3-methylbenzaldehyde (70 mg, 0.58 mmol, 1.0 eq.) and aniline (54 mg, 0.58 mmol, 1.0 eq.) as a white powder (125 mg, 38 mmol, 66%) after purification by flash column chromatography on silica gel (Chex/EtOAc 95:5) ( $R_f$  = 0.18, Chex/EtOAc 90:10).

**$^1\text{H}$  NMR (CDCl<sub>3</sub>, 300 MHz)** :  $\delta_{\text{H}}$  7.29-7.13 (6H, m), 8.83-6.78 (1H, m), 6.65-6.62 (3H, m), 4.66 (1H, s), 4.46 (1H, br s), 3.86-3.76 (1H, m, CH<sub>Cy</sub>), 2.35 (3H, s), 1.91-1.78 (2H, m), 1.66-1.58 (3H, m), 1.38-1.30 (2H, m), 1.18-1.06 (3H, m).

**$^{13}\text{C}$  NMR (CDCl<sub>3</sub>, 75 MHz)** :  $\delta_{\text{C}}$  170.2, 147.0, 139.1, 139.0, 129.4, 129.16, 128.3, 124.4, 119.2, 114.0, 64.6, 48.2, 33.1, 32.9, 25.6, 24.9, 24.8, 21.2

**FTIR (film, KBr)**:  $\nu$  (cm<sup>-1</sup>) = 3306, 3051, 3024, 2926, 2854, 1652, 1646, 1603, 1549, 1505, 1464, 1451, 1434, 1317, 1254, 778, 748, 692.

**HRMS (TOF/ESI<sup>+</sup>)** Calculated for C<sub>21</sub>H<sub>27</sub>ON<sub>2</sub> [M+H]<sup>+</sup> 323.21179 found 323.21158.

**HRMS (TOF/ESI<sup>+</sup>)** Calculated for C<sub>21</sub>H<sub>26</sub>ON<sub>2</sub>Na [M+Na]<sup>+</sup> 345.19373 found 345.19353.

**m.p.** 134-136°C (toluene).

#### *N*-(cyclohexyl)- $\alpha$ -(phenylamino)-2,4,6-trimethylbenzeneacetamide

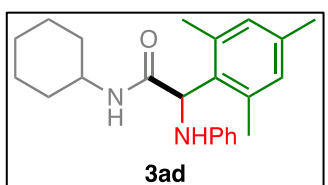

Following the general procedure D, **3ad** was obtained from *N*-(cyclohexyl)oxamic acid (100 mg, 0.58 mmol, 1.0 eq.), 2,4,6-trimethylbenzaldehyde (87 mg, 0.58 mmol, 1.0 eq.) and aniline (54 mg, 0.58 mmol, 1.0 eq.) as a colorless oil (67 mg, 21 mmol, 36%) after

purification by flash column chromatography on silica gel (Chex/EtOAc 97:3) ( $R_f$  = 0.23, Chex/EtOAc 90:10).

$^1\text{H NMR}$  ( $\text{CDCl}_3$ , 300 MHz) :  $\delta_{\text{H}}$  7.19-7.14 (2H, m), 6.87 (2H, s), 6.79-6.74 (1H, m), 6.62-6.59 (2H, m), 6.35-6.32 (1H, m), 5.13 (1H, s), 3.91-3.81 (1H, m), 2.35 (6H, s), 2.26 (3H, s), 1.88-1.85 (2H, m), 1.65-1.59 (3H, m), 1.39-1.27 (2H, m), 1.14-1.07 (3H, m).

$^{13}\text{C NMR}$  ( $\text{CDCl}_3$ , 75 MHz) :  $\delta_{\text{C}}$  170.7, 147.9, 137.8, 137.1, 133.1, 130.5, 129.4, 118.8, 113.8, 59.7, 48.3, 33.0, 32.8, 25.6, 24.9, 24.8, 21.0, 20.9.

FTIR (film, KBr):  $\nu$  ( $\text{cm}^{-1}$ ) = 3369, 2923, 2852, 1656, 1604, 1515, 1505, 1464, 1447, 1316, 749.

HRMS (TOF/ESI $^-$ ) Calculated for  $\text{C}_{23}\text{H}_{29}\text{ON}_2$  [ $\text{M}-\text{H}$ ] $^-$  349.22854 found 349.22814.

### *N*-(cyclohexyl)-3-methoxy- $\alpha$ -(phenylamino)phenolacetamide

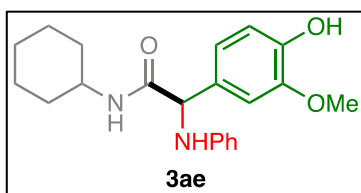

Following the general procedure D, **3ae** was obtained from *N*-(cyclohexyl)oxamic acid (100 mg, 0.58 mmol, 1.0 eq.), vaniline (89 mg, 0.58 mmol, 1.0 eq.) and aniline (54 mg, 0.58 mmol, 1.0 eq.) as a white powder (106 mg, 29 mmol, 51%) after purification by flash column chromatography on silica gel (Chex/EtOAc 80:20) ( $R_f$  = 0.06,

Chex/EtOAc 75:25).

$^1\text{H NMR}$  ( $\text{CDCl}_3$ , 300 MHz) :  $\delta_{\text{H}}$  7.21-7.16 (2H, m), 6.90 (3H, m), 6.82-6.77 (1H, m), 6.64-6.57 (3H, m), 5.89-5.88 (1H, br s), 4.61 (1H, s), 4.56 (1H, br s), 3.85-3.79 (4H, s), 1.90-1.76 (2H, m), 1.70-1.57 (3H, m), 1.38-1.25 (2H, m), 1.21-0.97 (3H, m).

$^{13}\text{C NMR}$  ( $\text{CDCl}_3$ , 75 MHz) :  $\delta_{\text{C}}$  170.5, 147.2, 147.0, 146.0, 131.0, 129.4, 120.2, 119.2, 115.0, 114.0, 110.1, 64.3, 56.0, 48.2, 33.2, 32.9, 25.5, 24.9, 24.7.

FTIR (film, KBr):  $\nu$  ( $\text{cm}^{-1}$ ) = 3339, 3053, 2930, 2854, 1645, 1603, 1514, 1506, 1464, 1451, 1432, 1373, 1350, 1314, 1267, 1233, 1182, 1155, 1128, 1032, 809, 751, 737, 894.

HRMS (TOF/ESI $^-$ ) Calculated for  $\text{C}_{21}\text{H}_{25}\text{O}_3\text{N}_2$  [ $\text{M}-\text{H}$ ] $^-$  353.18707, found 353.18698.

m.p. 136-138°C (toluene).

### *N*-(Cyclohexyl)- $\alpha$ -(phenylamino)-3,4-dimethoxybenzeneacetamide

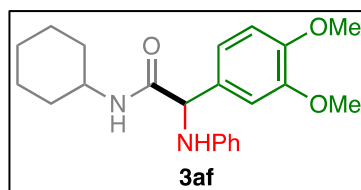

Following the general procedure D, **3af** was obtained from *N*-(cyclohexyl)oxamic acid (100 mg, 0.58 mmol, 1.0 eq.), 3,4-dimethoxybenzaldehyde (97 mg, 0.58 mmol, 1.0 eq.) and aniline (54 mg, 0.58 mmol, 1.0 eq.) as a colorless oil (95 mg, 26 mmol, 44%) after purification by flash column chromatography on silica gel (Chex/EtOAc

85:15) ( $R_f$  = 0.16, Chex/EtOAc 80:20).

$^1\text{H NMR}$  ( $\text{CDCl}_3$ , 300 MHz) :  $\delta_{\text{H}}$  7.21-7.16 (2H, m), 6.99-6.93 (2H, m), 6.87-6.80 (2H, m), 6.65-6.63 (2H, m), 6.57-6.54 (1H, m), 6.64 (1H, s), 4.60 (1H, br s), 1.91-1.77 (2H, m), 1.69-1.57 (3H, m), 1.38-1.29 (2H, m), 1.17-1.04 (3H, m).

$^{13}\text{C NMR}$  ( $\text{CDCl}_3$ , 75 MHz) :  $\delta_{\text{C}}$  170.2, 149.6, 149.3, 146.8, 131.7, 119.8, 119.3, 114.1, 111.6, 110.5, 64.2, 56.1, 56.0, 48.2, 33.2, 32.9, 25.5, 24.9, 24.7.

FTIR (film, KBr):  $\nu$  ( $\text{cm}^{-1}$ ) = 3353, 3053, 2925, 2853, 1652, 1646, 1604, 1513, 1506, 1464, 1453, 1317, 1259, 1235, 1144, 1028, 750, 693.

HRMS (TOF/ESI $^+$ ) Calculated for  $\text{C}_{22}\text{H}_{29}\text{O}_3\text{N}_2$  [ $\text{M}+\text{H}$ ] $^+$  369.21727 found 369.21718.

HRMS (TOF/ESI $^+$ ) Calculated for  $\text{C}_{22}\text{H}_{28}\text{O}_3\text{N}_2\text{Na}$  [ $\text{M}+\text{Na}$ ] $^+$  391.19921 found 391.19897.

m.p. 112-114°C.

#### *N*-(Cyclohexyl)- $\alpha$ -(phenylamino)[5-methyl-2-furyl]acetamide

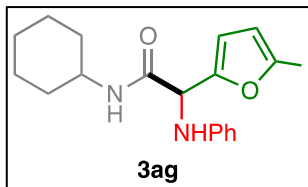

Following the general procedure D, **3ag** was obtained from *N*-(cyclohexyl)oxamic acid (100 mg, 0.58 mmol, 1.0 eq.), 5-methyl-2-furaldehyde (64 mg, 0.58 mmol, 1.0 eq.) and aniline (54 mg, 0.58 mmol, 1.0 eq.) as an orange oil (52 mg, 16 mmol, 28%) after purification by flash column chromatography on silica gel (Chex/EtOAc 95:5 to 90:10) ( $R_f$  = 0.16, Chex/EtOAc 90:10).

$^1\text{H NMR}$  ( $\text{CDCl}_3$ , 300 MHz) :  $\delta_{\text{H}}$  7.25-7.20 (2H, m), 6.86-6.83 (1H, m), 6.69-6.65 (2H, m), 6.26-6.25 (1H, d,  $J$  = 3.1 Hz), 5.96-5.95 (1H, dd,  $J$  = 3.1 Hz,  $J$  = 1.2 Hz), 4.80 (1H, s), 4.60 (1H, br s), 3.90-3.78 (1H, m), 2.31 (3H, s), 1.94-1.81 (2H, m), 1.74-1.58 (3H, m), 1.41-1.28 (2H, m), 1.23-1.06 (3H, m).

$^{13}\text{C NMR}$  ( $\text{CDCl}_3$ , 75 MHz) :  $\delta_{\text{C}}$  168.2, 152.4, 148.9, 146.6, 129.3, 119.2, 113.8, 109.2, 106.7, 58.2, 48.2, 32.8, 32.7, 25.4, 24.7, 24.6, 13.6.

FTIR (film, KBr):  $\nu$  ( $\text{cm}^{-1}$ ) = 3314, 2930, 2854, 1652, 1603, 1504, 1450, 1317, 1254, 1221, 1023, 750, 693.

HRMS (TOF/ESI<sup>+</sup>) Calculated for  $[\text{M}+\text{H}]^+$  313.19105 found 313.19049.  $\text{C}_{19}\text{H}_{25}\text{O}_2\text{N}_2$

#### *N*-(Cyclohexyl)- $\alpha$ -(4-cyanophenylamino)phenylacetamide

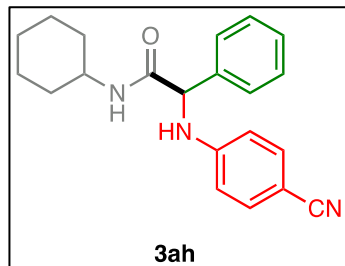

Following the general procedure D, **3ah** was obtained from *N*-(cyclohexyl)oxamic acid (100 mg, 0.58 mmol, 1.0 eq.), benzaldehyde (62 mg, 0.58 mmol, 1.0 eq.) and 4-cyanoaniline (69 mg, 0.58 mmol, 1.0 eq.) as a white powder (77 mg, 23 mmol, 40%) after purification by flash column chromatography on silica gel (Chex/EtOAc 87:13) ( $R_f$  = 0.10, Chex/EtOAc 85:15).

$^1\text{H NMR}$  ( $\text{CDCl}_3$ , 300 MHz) :  $\delta_{\text{H}}$  7.41-7.34 (7H, m), 6.56-6.53 (2H, m), 5.82-5.79 (1H, m), 5.64 (1H, br s), 4.77 (1H, s), 3.79-3.69 (1H, m), 1.90-1.86 (1H, m), 1.70-1.53 (4H, m), 1.36-1.25 (3H, m), 1.19-1.07 (2H, m).

$^{13}\text{C NMR}$  ( $\text{CDCl}_3$ , 75 MHz) :  $\delta_{\text{C}}$  168.7, 149.6, 138.2, 133.6, 129.5, 128.9, 127.0, 120.1, 113.4, 100.1, 62.0, 48.7, 32.8, 32.6, 25.3, 24.6, 24.5.

FTIR (film, KBr):  $\nu$  ( $\text{cm}^{-1}$ ) = 3324, 3063, 2932, 2855, 2215, 1671, 1606, 1521, 1452, 1335, 1173, 827, 732, 697.

HRMS (TOF/ESI<sup>+</sup>) Calculated for  $\text{C}_{21}\text{H}_{24}\text{ON}_3$   $[\text{M}+\text{H}]^+$  334.19139 found 334.19128.

m.p. 192-194°C (toluene).

#### Ethyl 4-[[2-((cyclohexyl)amino)-1-(phenyl)-2-oxoethyl]amino]benzoate

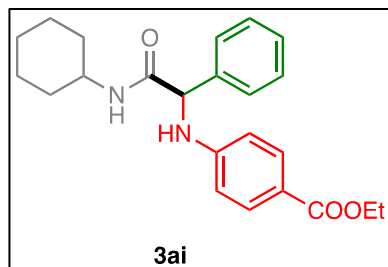

Following the general procedure D, **3ai** was obtained from *N*-(cyclohexyl)oxamic acid (100 mg, 0.58 mmol, 1.0 eq.), benzaldehyde (62 mg, 0.58 mmol, 1.0 eq.) and benzocaine (97 mg, 0.58 mmol, 1.0 eq.) as a white powder (89 mg, 23 mmol, 40%) after purification by flash column chromatography on silica gel (Chex/EtOAc 90:10) ( $R_f$  = 0.24, Chex/EtOAc 80:20).

**<sup>1</sup>H NMR (CDCl<sub>3</sub>, 300 MHz) :** δ<sub>H</sub> 7.79-7.76 (2H, m), 7.38-7.28 (5H, m), 6.51-6.48 (2H, m), 6.11-6.08 (1H, m), 5.10 (1H, br s), 4.74 (1H, s), 4.26-4.19 (2H, q, *J* = 7.1 Hz), 3.75-3.66 (1H, m), 1.86-1.80 (1H, m), 1.69-1.48 (4H, m), 1.30-1.21 (5H, t + m, *J* = 7.1 Hz), 1.09-0.85 (3H, m).

**<sup>13</sup>C NMR (CDCl<sub>3</sub>, 75 MHz) :** δ<sub>C</sub> 169.3, 166.8, 150.3, 138.6, 131.5, 129.4, 128.8, 127.3, 120.5, 112.8, 62.8, 60.4, 48.6, 33.0, 32.7, 25.5, 24.8, 24.7, 14.5.

**FTIR (film, KBr):** ν (cm<sup>-1</sup>) = 3333, 3063, 3033, 2981, 2933, 2856 1689, 1681, 1668, 1661, 1652, 1606, 1524, 1495, 1477, 1453, 1417, 1392, 1367, 1335, 1313, 1279, 1175, 1107, 1024, 840, 771, 784, 699.

**HRMS (TOF/ESI<sup>+</sup>)** Calculated for C<sub>23</sub>H<sub>29</sub>O<sub>3</sub>N<sub>2</sub> [M+H]<sup>+</sup> 381.21727 found 381.21710.

**m.p.** 117-120°C (toluene)

### Methyl-4-[2-(cyclopropylamino)-1-(3,4-dichlorophenylamino)]-2-oxoethyl]benzoate

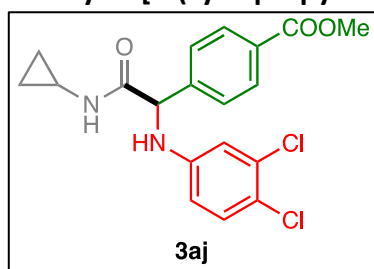

Following the general procedure D, **3aj** was obtained from *N*-(cyclopropyl)oxamic acid (75 mg, 0.58 mmol, 1.0 eq.), methyl 4-formylbenzoate (95 mg, 0.58 mmol, 1.0 eq.) and 3,4-dichloroaniline (94 mg, 0.58 mmol, 1.0 eq.) as a white powder (95 mg, 24 mmol, 42%) after purification by flash column chromatography on silica gel (Chex/EtOAc 80:20) (*R*<sub>f</sub> = 0.09, Chex/EtOAc 80:20).

**<sup>1</sup>H NMR (CDCl<sub>3</sub>, 300 MHz) :** δ<sub>H</sub> 8.06-8.03 (2H, m), 7.50-7.47 (2H, m), 7.17-7.14 (1H, m), 6.65-6.64 (1H, s), 6.44-6.40 (1H, m), 6.22 (1H, br s), 4.74 (1H, s), 3.91 (3H, s), 2.71-2.65 (1H, m), 0.78-0.74 (2H, m), 0.43-0.42 (2H, m).

**<sup>13</sup>C NMR (CDCl<sub>3</sub>, 75 MHz) :** δ<sub>C</sub> 170.7, 166.5, 144.5, 142.4, 133.1, 130.9, 130.9, 130.8, 127.6, 122.9, 116.3, 114.5, 63.1, 52.5, 23.1, 6.9, 6.7.

**FTIR (film, KBr):** ν (cm<sup>-1</sup>) = 3339, 3063, 3010, 2953, 2924, 2852, 1718, 1660, 1598, 1493, 1477, 1436, 1313, 1285, 1192, 1132, 1115, 1020, 738, 703.

**HRMS (TOF/ESI<sup>+</sup>)** Calculated for C<sub>19</sub>H<sub>19</sub>O<sub>3</sub>N<sub>2</sub>Cl<sub>2</sub> [M+H]<sup>+</sup> 393.07672 found 393.07709.

**m.p.** 172°C (toluene).

### *N*-(3,5-dimethylphenyl)-α-(3-trifluorobenzamino)-4-methoxybenzeneacetamide

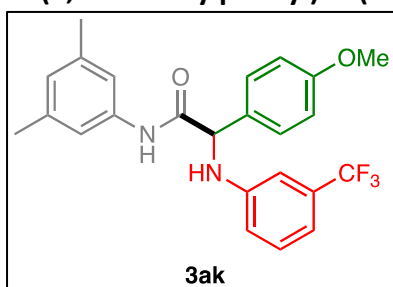

Following the general procedure D, **3ak** was obtained from *N*-(3,5-dimethylphenyl)oxamic acid (100 mg, 0.52 mmol, 1.0 eq.), anisaldehyde (71 mg, 0.52 mmol, 1.0 eq.) and 3-trifluoromethylaniline (83 mg, 0.52 mmol, 1.0 eq.) as a white powder (85 mg, 20 mmol, 38%) after purification by flash column chromatography on silica gel (Chex/EtOAc 95:5 to 90:10) (*R*<sub>f</sub> = 0.37, Chex/EtOAc 80:20).

**<sup>1</sup>H NMR (CDCl<sub>3</sub>, 300 MHz) :** δ<sub>H</sub> 8.18 (1H, s), 7.42-7.39 (2H, m), 7.31-7.25 (1H, m), 7.12 (2H, s), 7.06-7.03 (1H, m), 6.94-6.90 (3H, m), 6.81-6.78 (1H, m), 6.76 (1H, s), 4.91 (1H, br s), 4.81-4.80 (1H, s), 3.80 (3H, s), 2.27 (6H, s).

**<sup>19</sup>F NMR (CDCl<sub>3</sub>, 272 MHz):** δ<sub>F</sub> -62.9.

**<sup>13</sup>C NMR (CDCl<sub>3</sub>, 75 MHz) :** δ<sub>C</sub> 169.2, 160.2, 146.8, 139.0, 137.0, 131.7 (q, *J*<sub>C-F</sub> = 32 Hz), 130.1, 128.7, 126.7, 124.0 (q, *J*<sub>C-F</sub> = 232 Hz), 117.9, 116.6, 115.9 (*J*<sub>C-F</sub> = 3.6 Hz), 115.0, 111.0 (q, *J*<sub>C-F</sub> = 3.6 Hz), 63.9, 56.5, 21.4.

**FTIR (film, KBr):  $\nu$  ( $\text{cm}^{-1}$ ) = 3319, 3013, 2957, 2922, 2840, 1660, 1615, 1512, 1441, 1342, 1306, 1252, 1178, 1165, 1124, 1070, 1034, 835, 784, 697.**

**HRMS (TOF/ESI<sup>+</sup>)** Calculated for  $\text{C}_{24}\text{H}_{24}\text{O}_2\text{N}_2\text{F}_3$   $[\text{M}+\text{H}]^+$  429.17844 found 429.17877.

**m.p.** 117-120°C (toluene).



## 9. References

- 1 G. Kurtay, J. Lusseau, F. Robert and Y. Landais, *Synlett*, 2023, **35**, 342-346.
- 2 C. Ma, Y. Tian, J. Wang, X. He, Y. Jiang and B. Yu, *Org. Lett.*, 2022, **24**, 8265–8270.
- 3 M. Jouffroy and J. Kong, *Chem. Eur. J.*, 2019, **25**, 2217–2221.
- 4 K. Zhou, D. Wang, G. Ju, Z. Deng, P. Huang, Z. Huang, B. Li and Y. Zhao, *Org. Lett.*, 2022, **24**, 5568–5572.
- 5 S. Choi, A. B. Beeler, A. Pradhan, E. B. Watkins, J. M. Rimoldi, B. Tekwani and M. A. Avery, *J. Comb. Chem.*, 2007, **9**, 292–300.
- 6 Y. Yu, J. A. Deck, L. A. Hunsaker, L. M. Deck, R. E. Royer, E. Goldberg and D. L. Vander Jagt, *Biochemical Pharmacology*, 2001, **62**, 81–89.
- 7 G. G. Pawar, F. Robert, E. Grau, H. Cramail and Y. Landais, *Chem. Commun.*, 2018, **54**, 9337–9340.
- 8 I. M. Ogbu, J. Lusseau, G. Kurtay, F. Robert and Y. Landais, *Chem. Commun.*, 2020, **56**, 12226–12229.
- 9 J. Liu, B. Zhang, J. Hu, Z. Qiu, X. Chen, X. Tian, Q. Wang, G. Zheng and M. Yuan, *Eur. J. Org. Chem.*, 2023, **26**, e202201378.
- 10 S. V. Kumar and D. Ma, *J. Org. Chem.*, 2018, **83**, 2706–2713.
- 11 R. B. Strand, T. Helgerud, T. Solvang, C. A. Sperger and A. Fiksdahl, *Tetrahedron: Asymmetry*, 2011, **22**, 1994–2006.
- 12 S. Gambaro, C. Talotta, P. Della Sala, A. Soriente, M. De Rosa, C. Gaeta and P. Neri, *J. Am. Chem. Soc.*, 2020, **142**, 14914–14923.
- 13 L. Wang, C. Cao and C. Cao, *Magn. Reson. Chem.*, 2015, **53**, 520–525.
- 14 L. Cardinale, M.-O. W. S. Schmotz, M. O. Konev and A. Jacobi Von Wangelin, *Org. Lett.*, 2022, **24**, 506–510.
- 15 A. K. V. Mruthunjaya and A. A. J. Torriero, *Molecules*, 2023, **28**, 471.
- 16 H. Neuvonen, K. Neuvonen and F. Fülöp, *J. Org. Chem.*, 2006, **71**, 3141–3148.
- 17 Z. Li and J.-P. Cheng, *J. Org. Chem.*, 2003, **68**, 7350–7360.
- 18 I. Sasaki, T. Ikeda, T. Amou, J. Taguchi, H. Ito and T. Ishiyama, *Synlett*, 2016, **27**, 1582–1586.

## 10. NMR Spectra

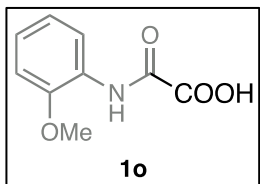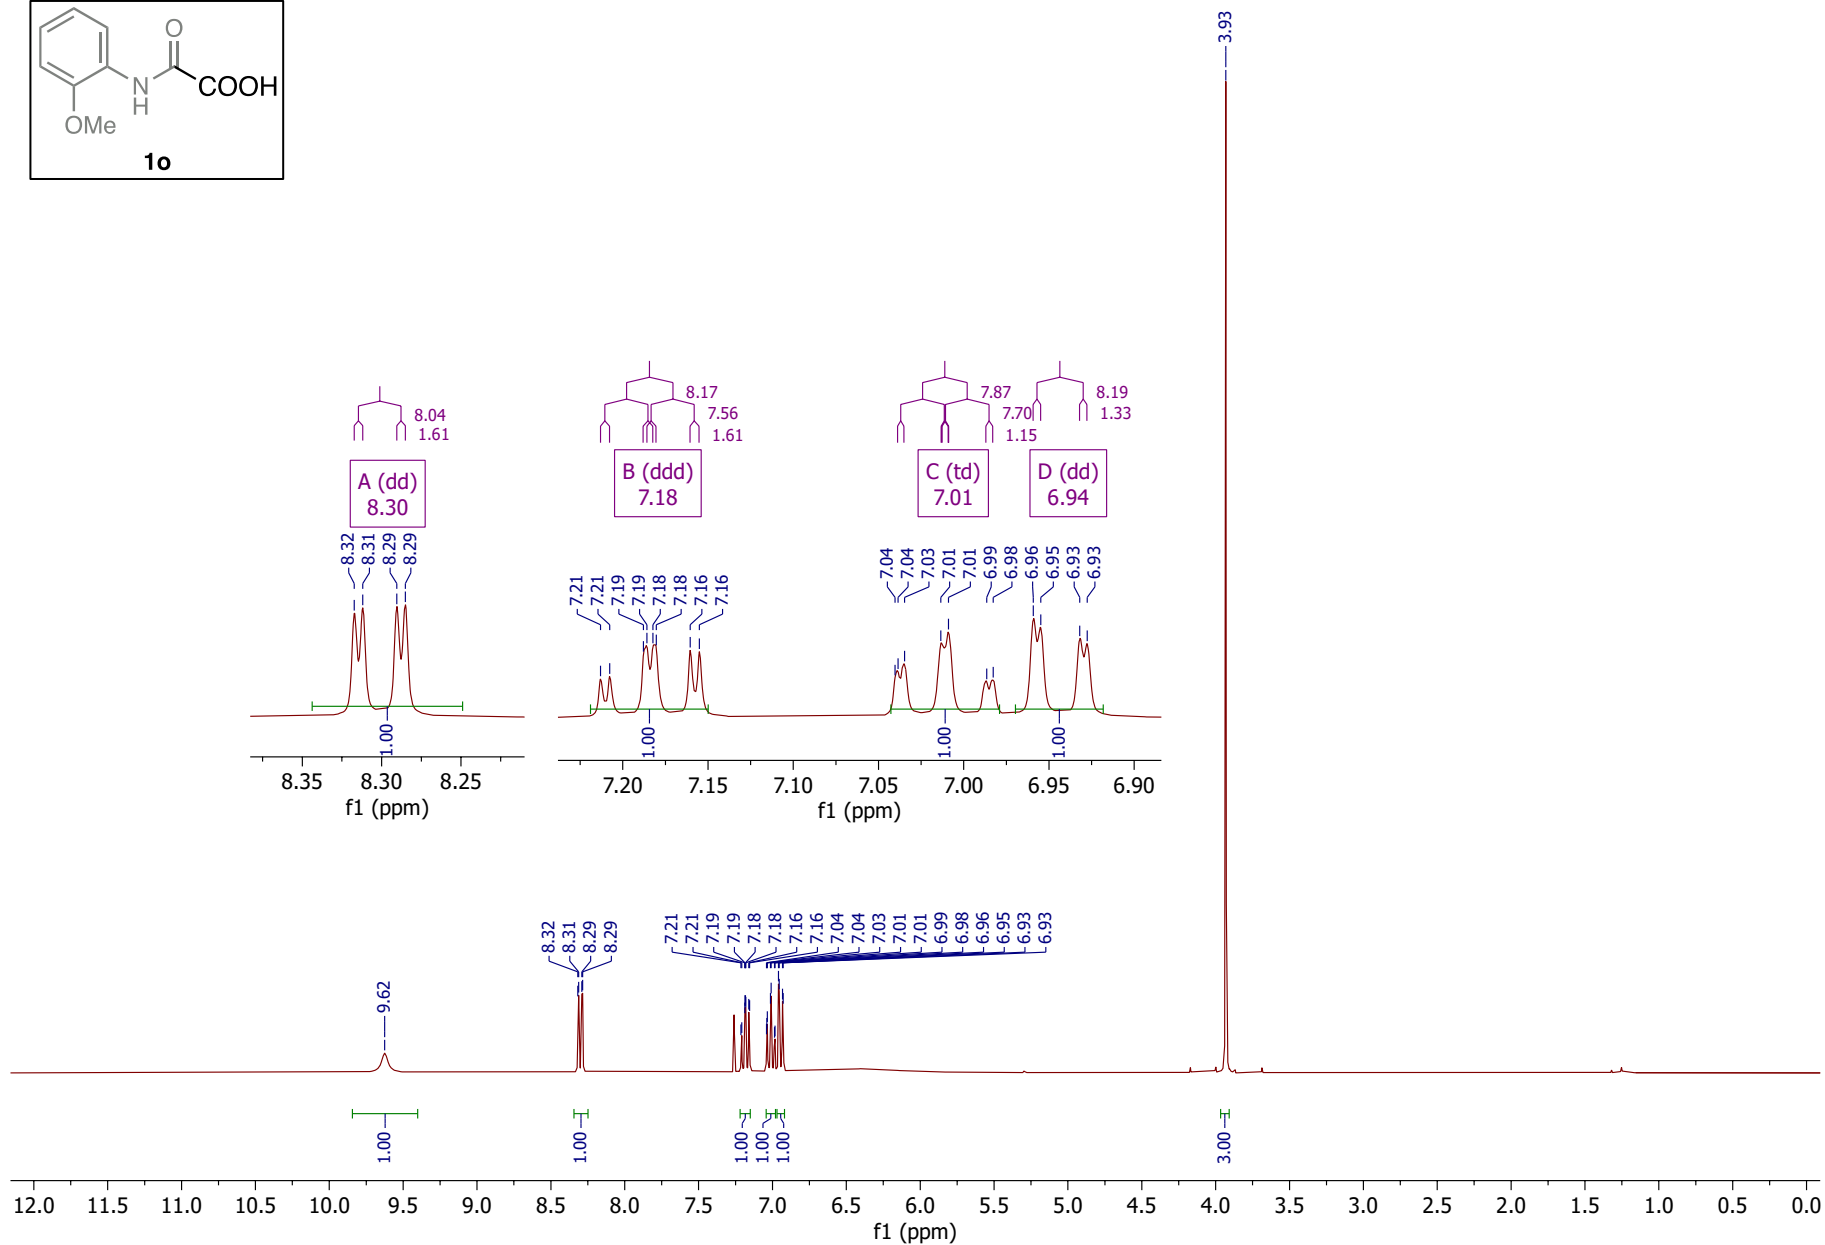

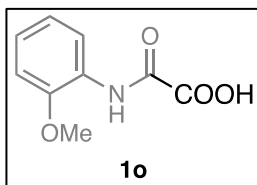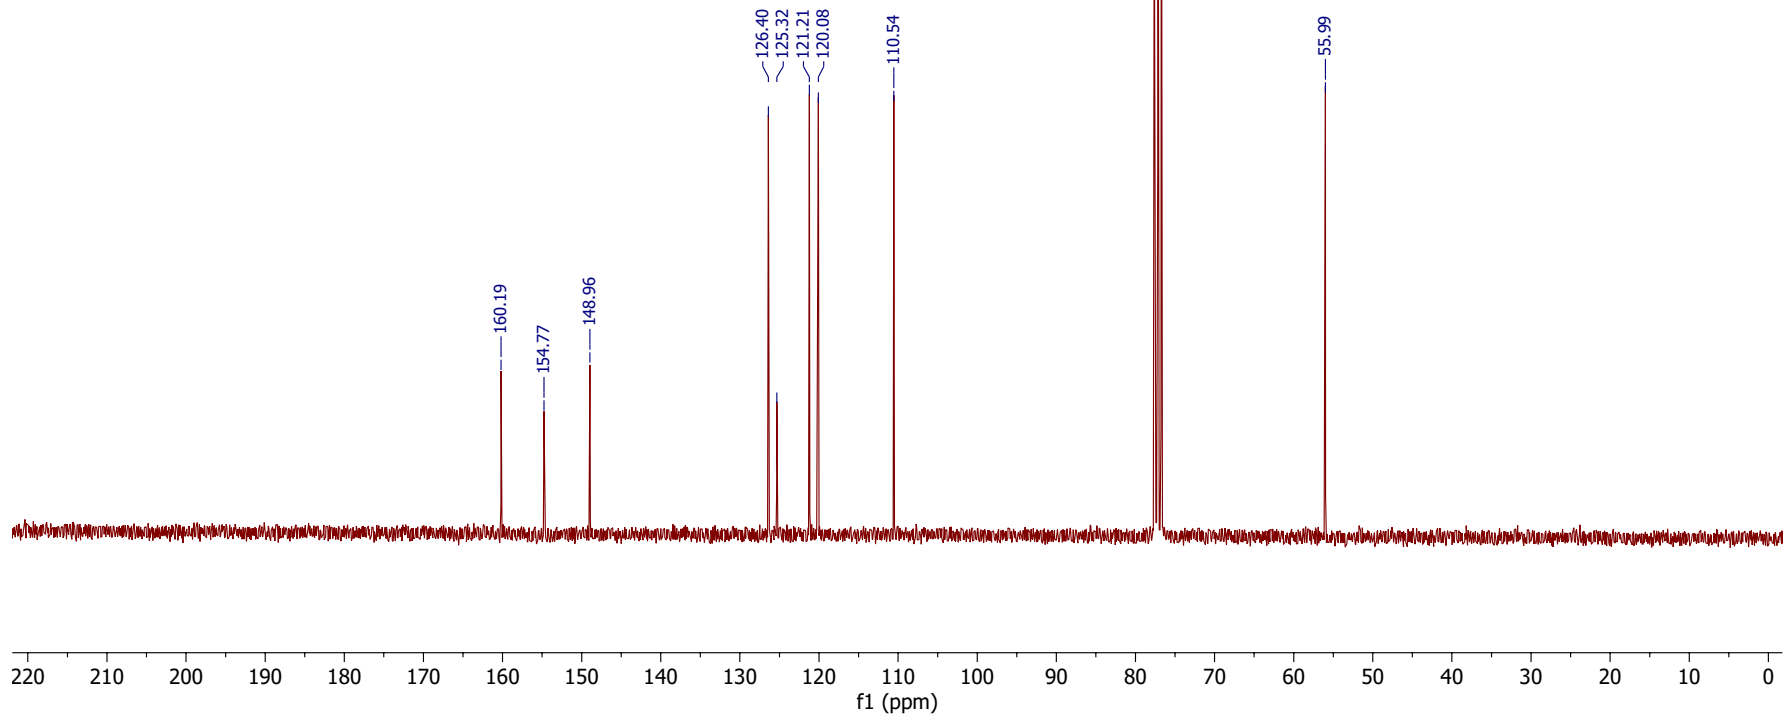

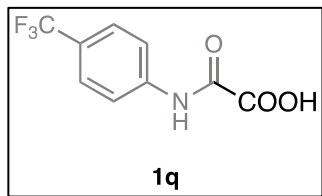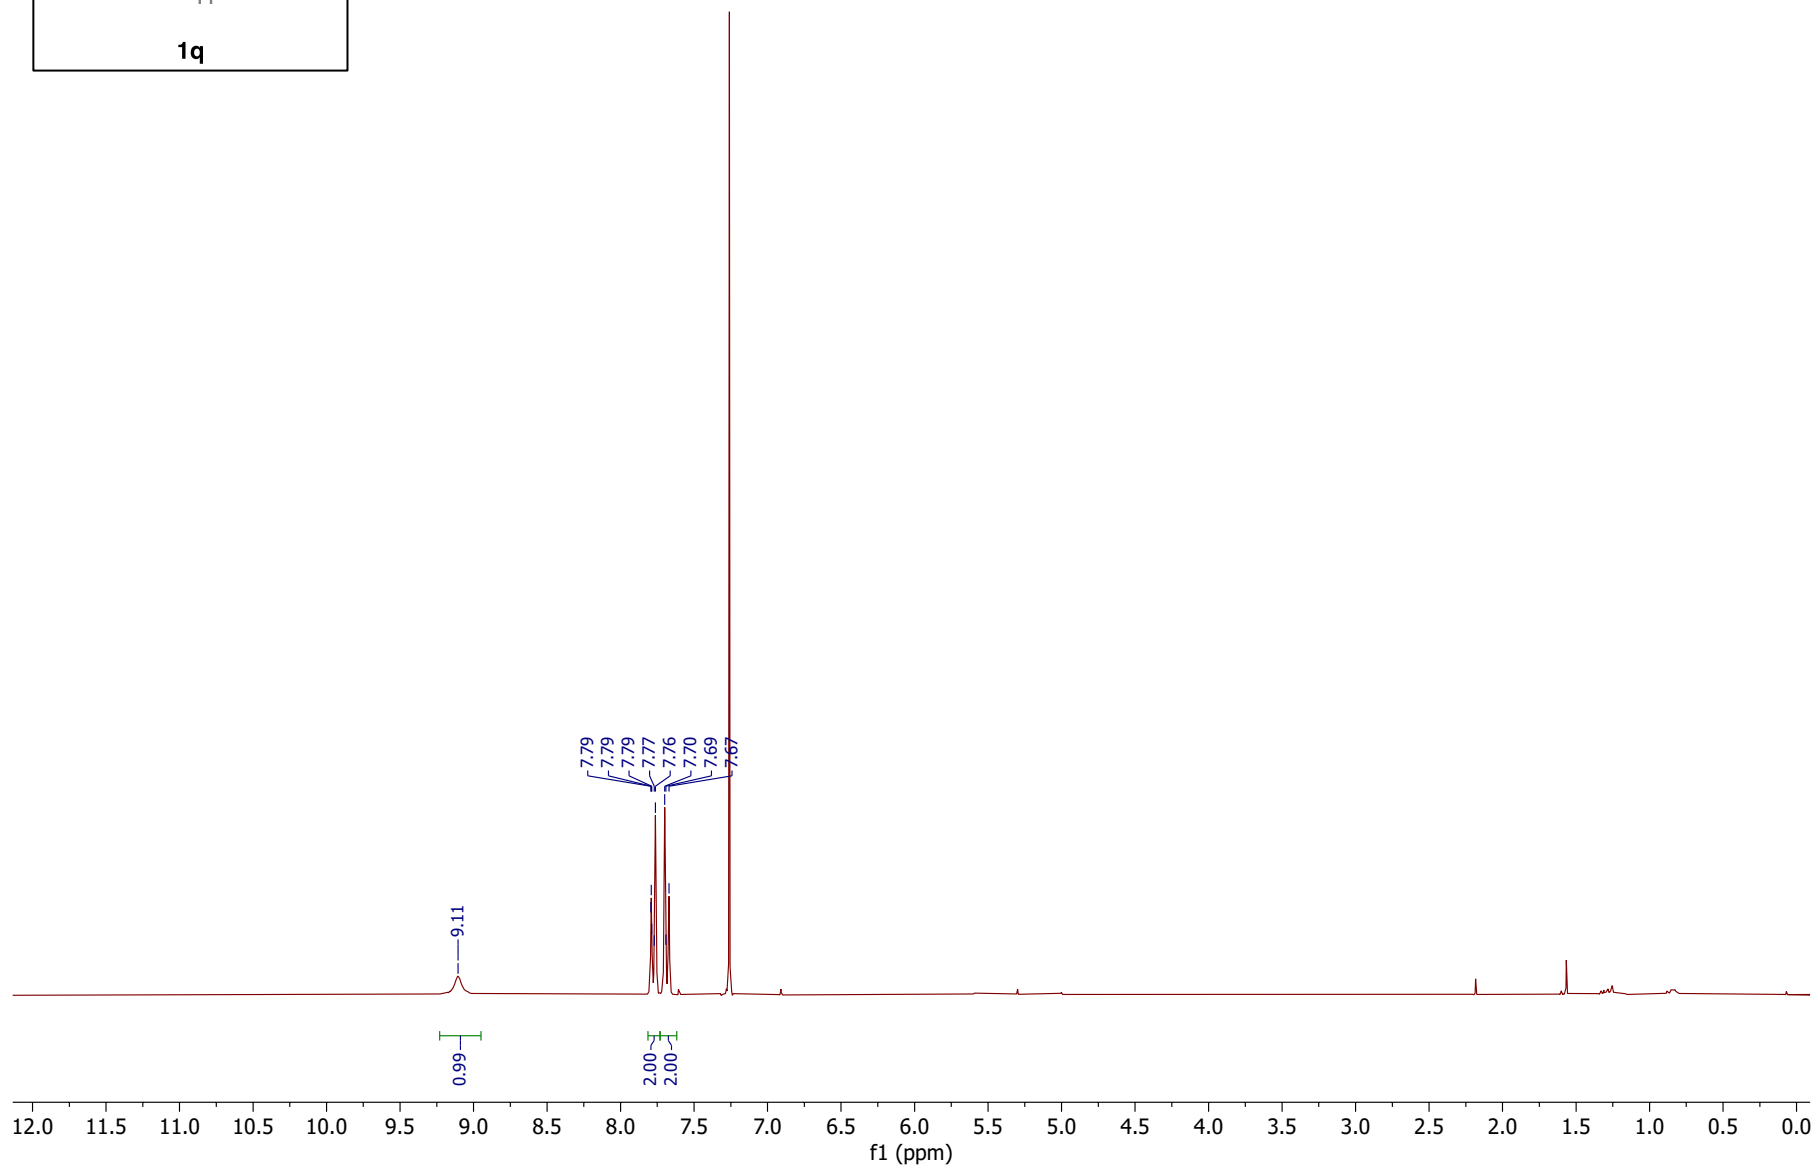

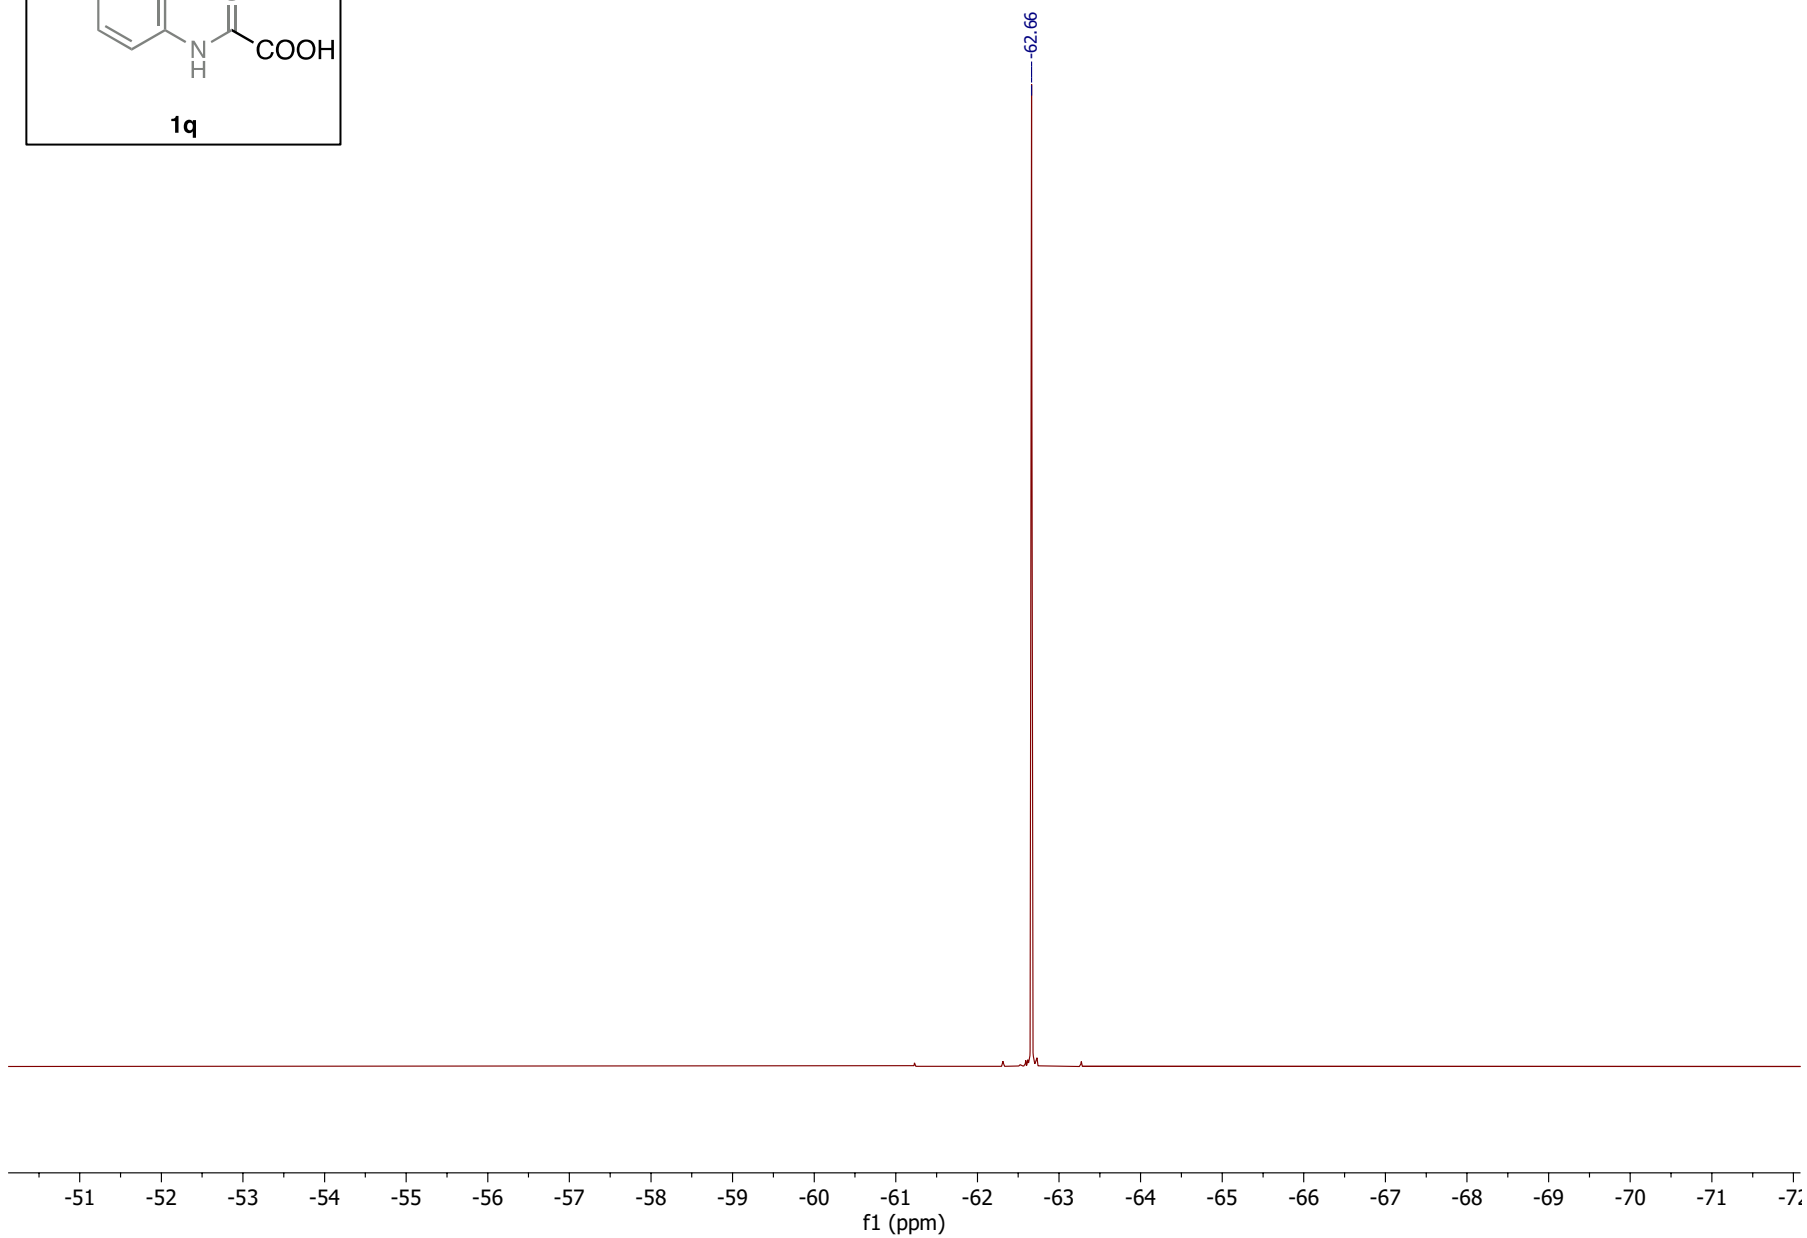

S28

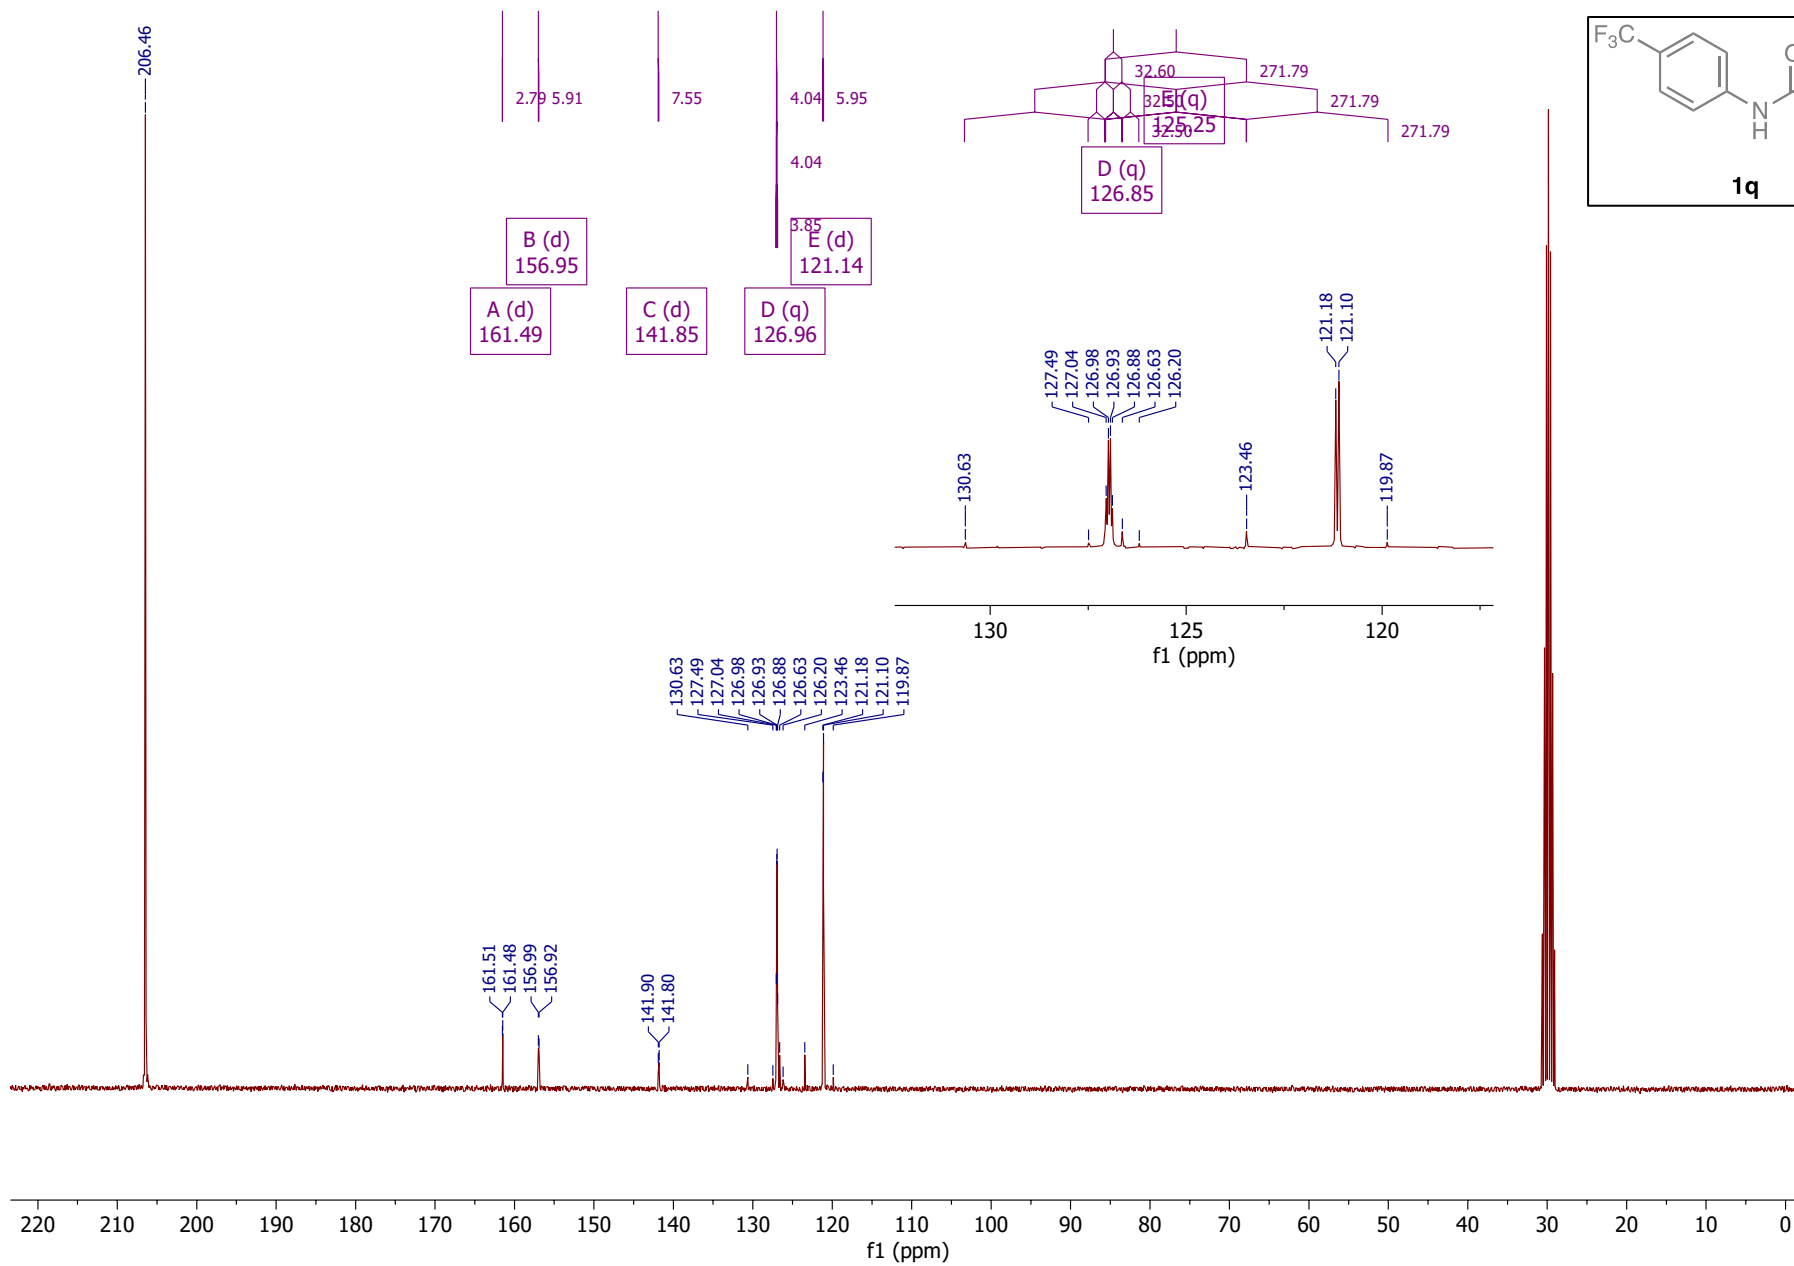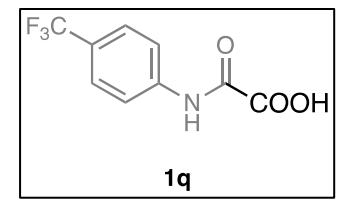

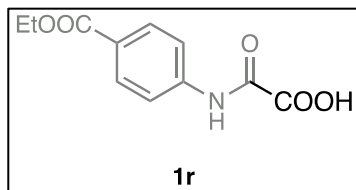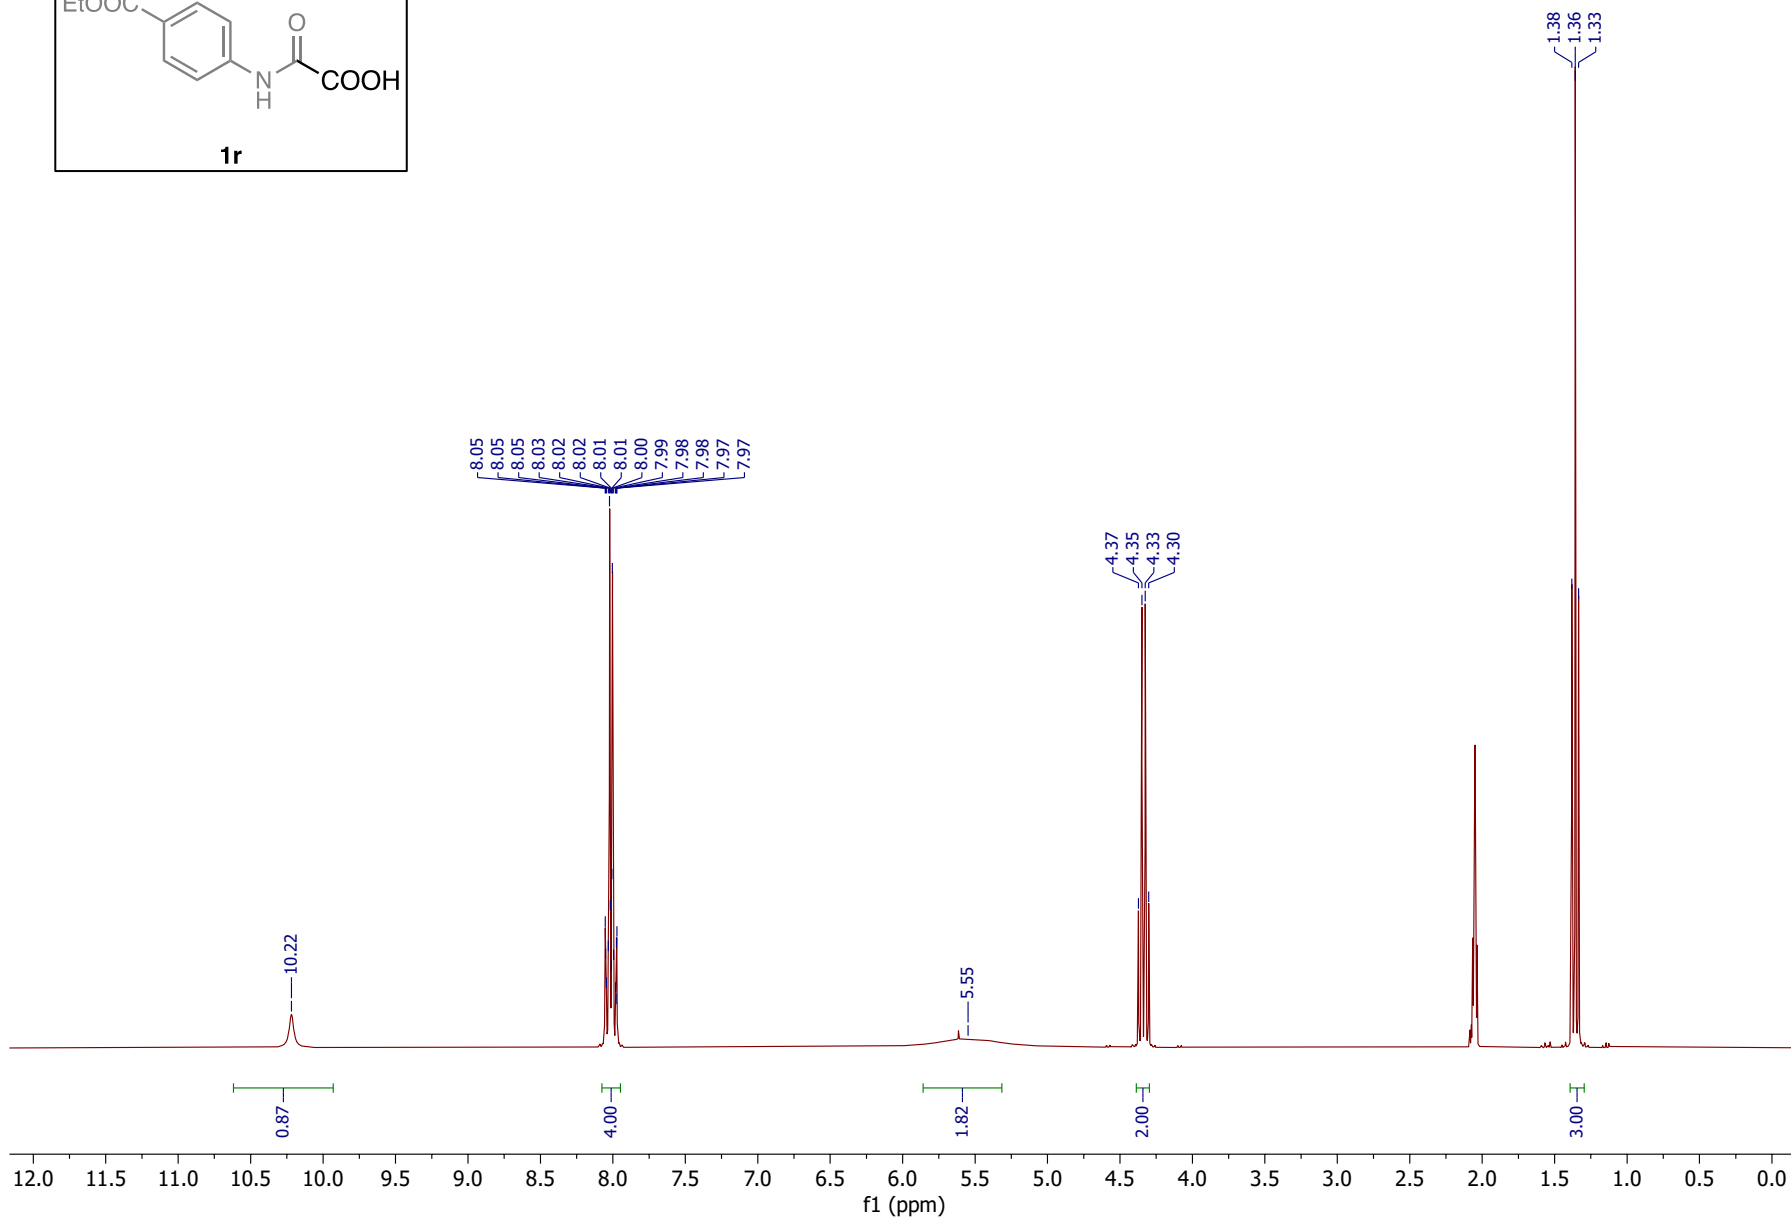

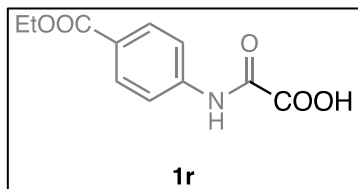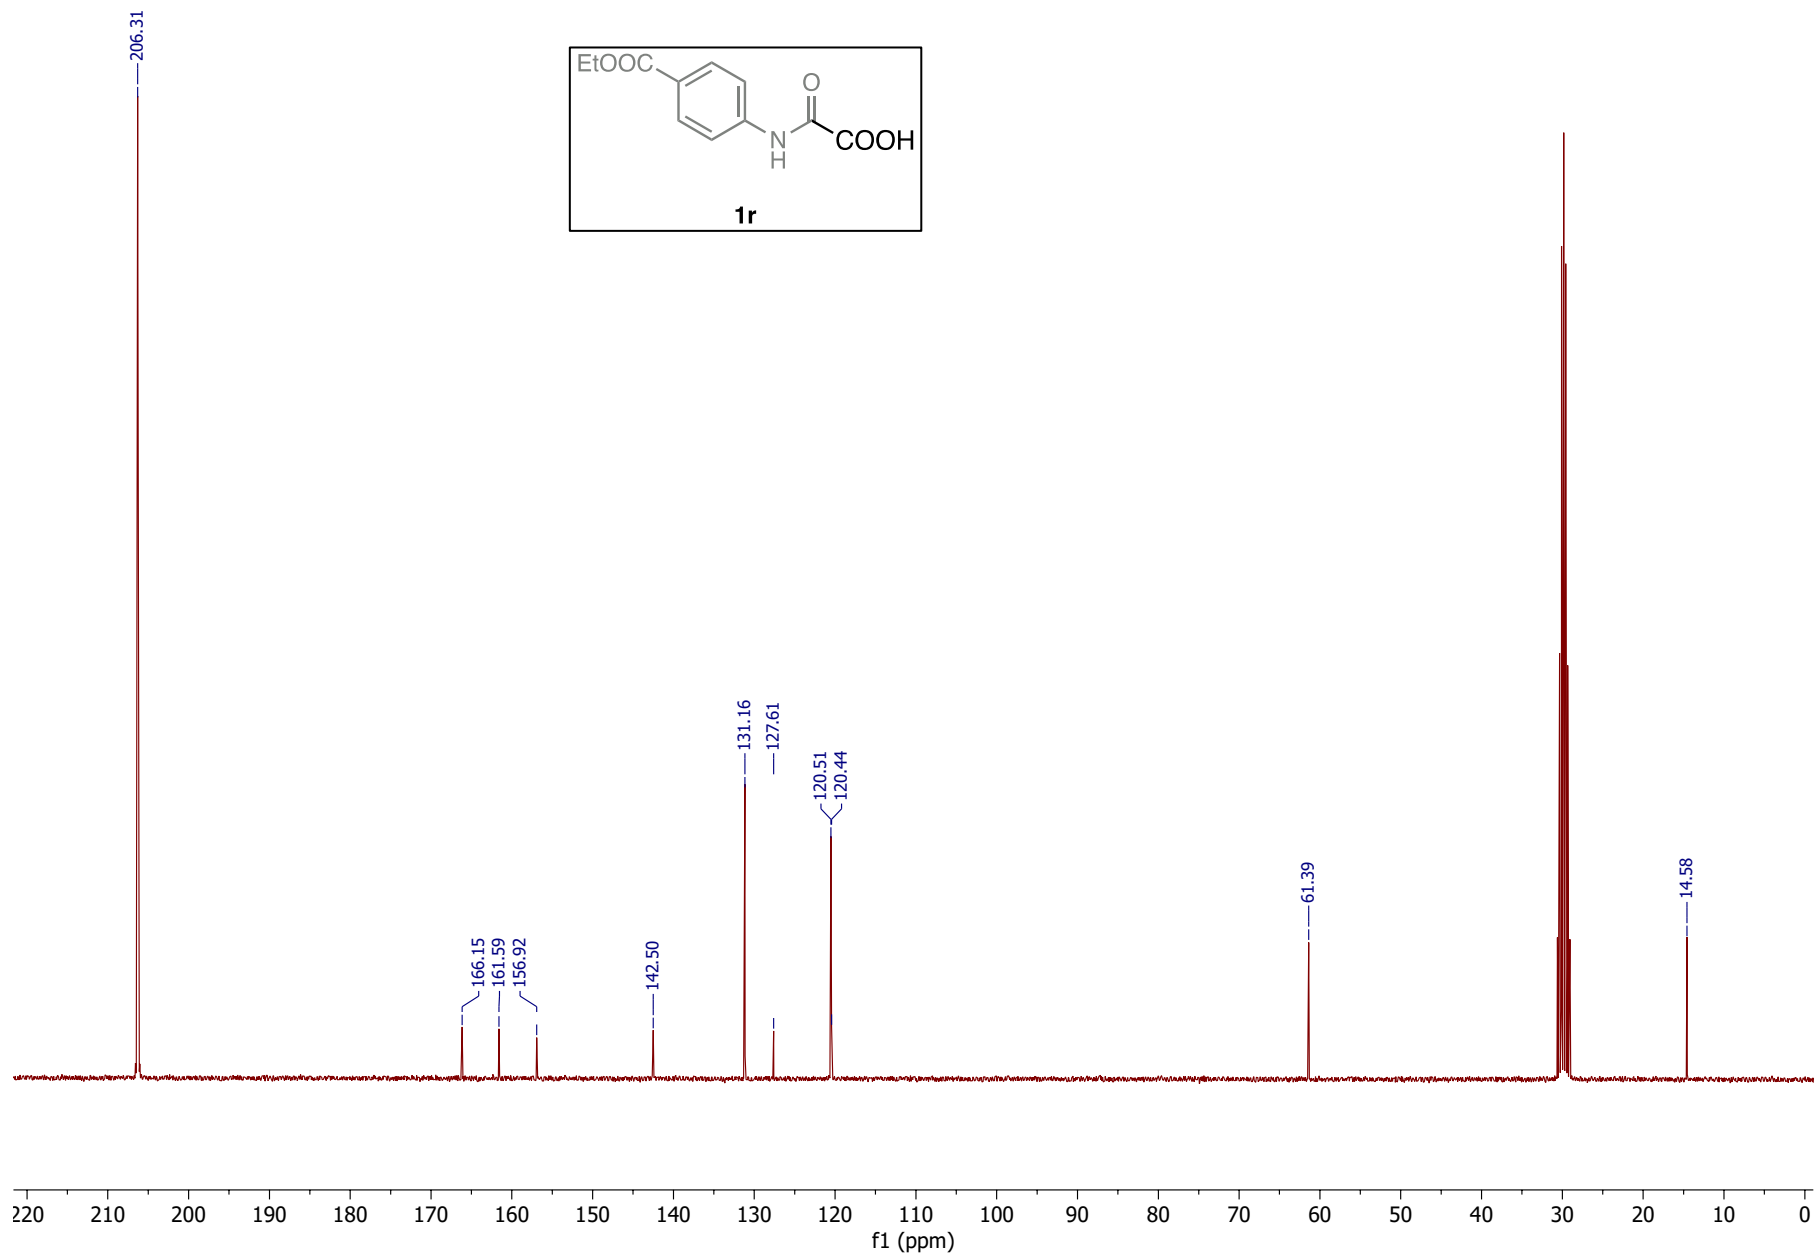



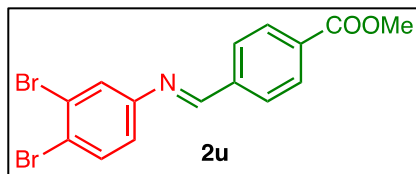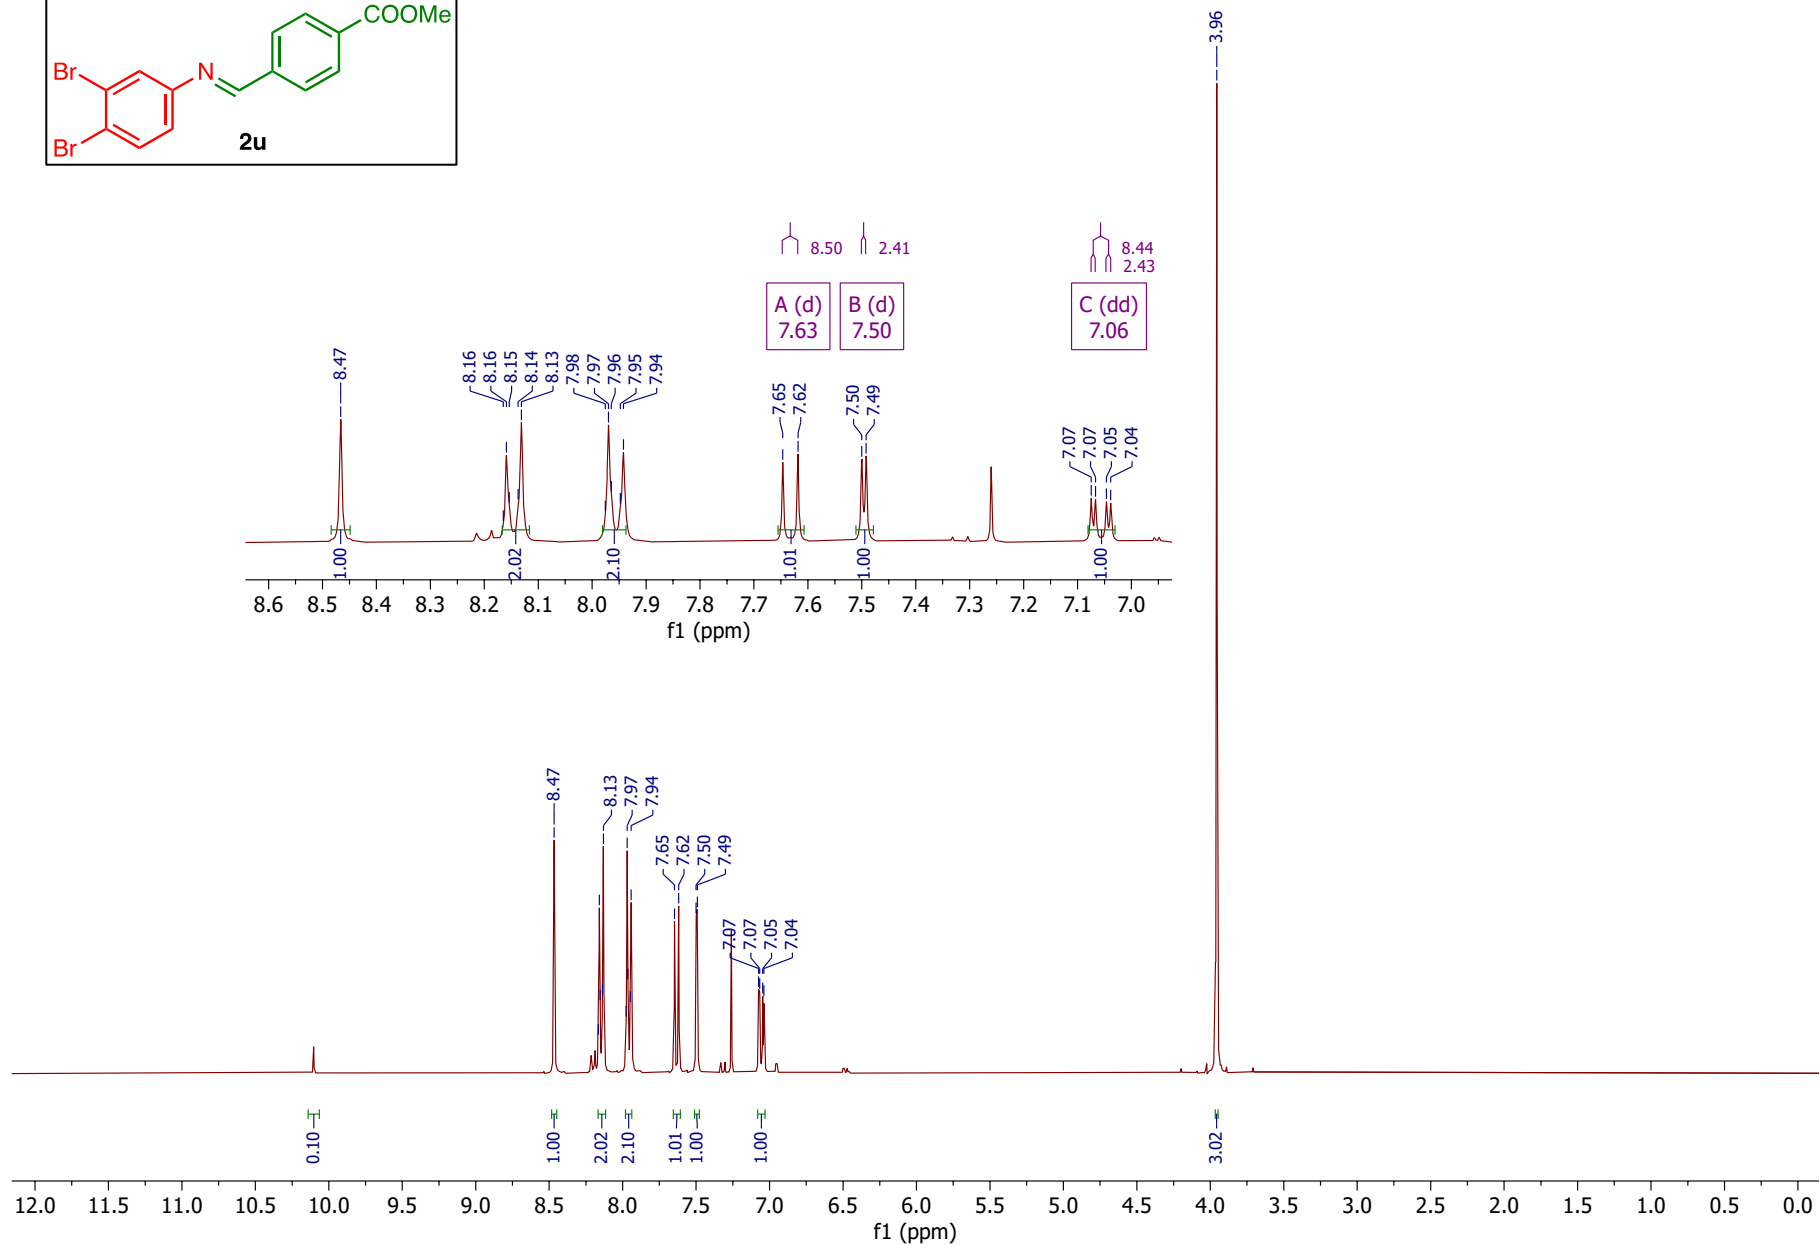

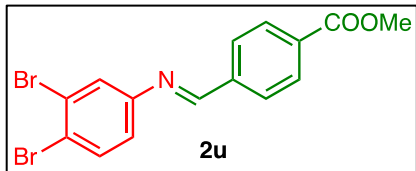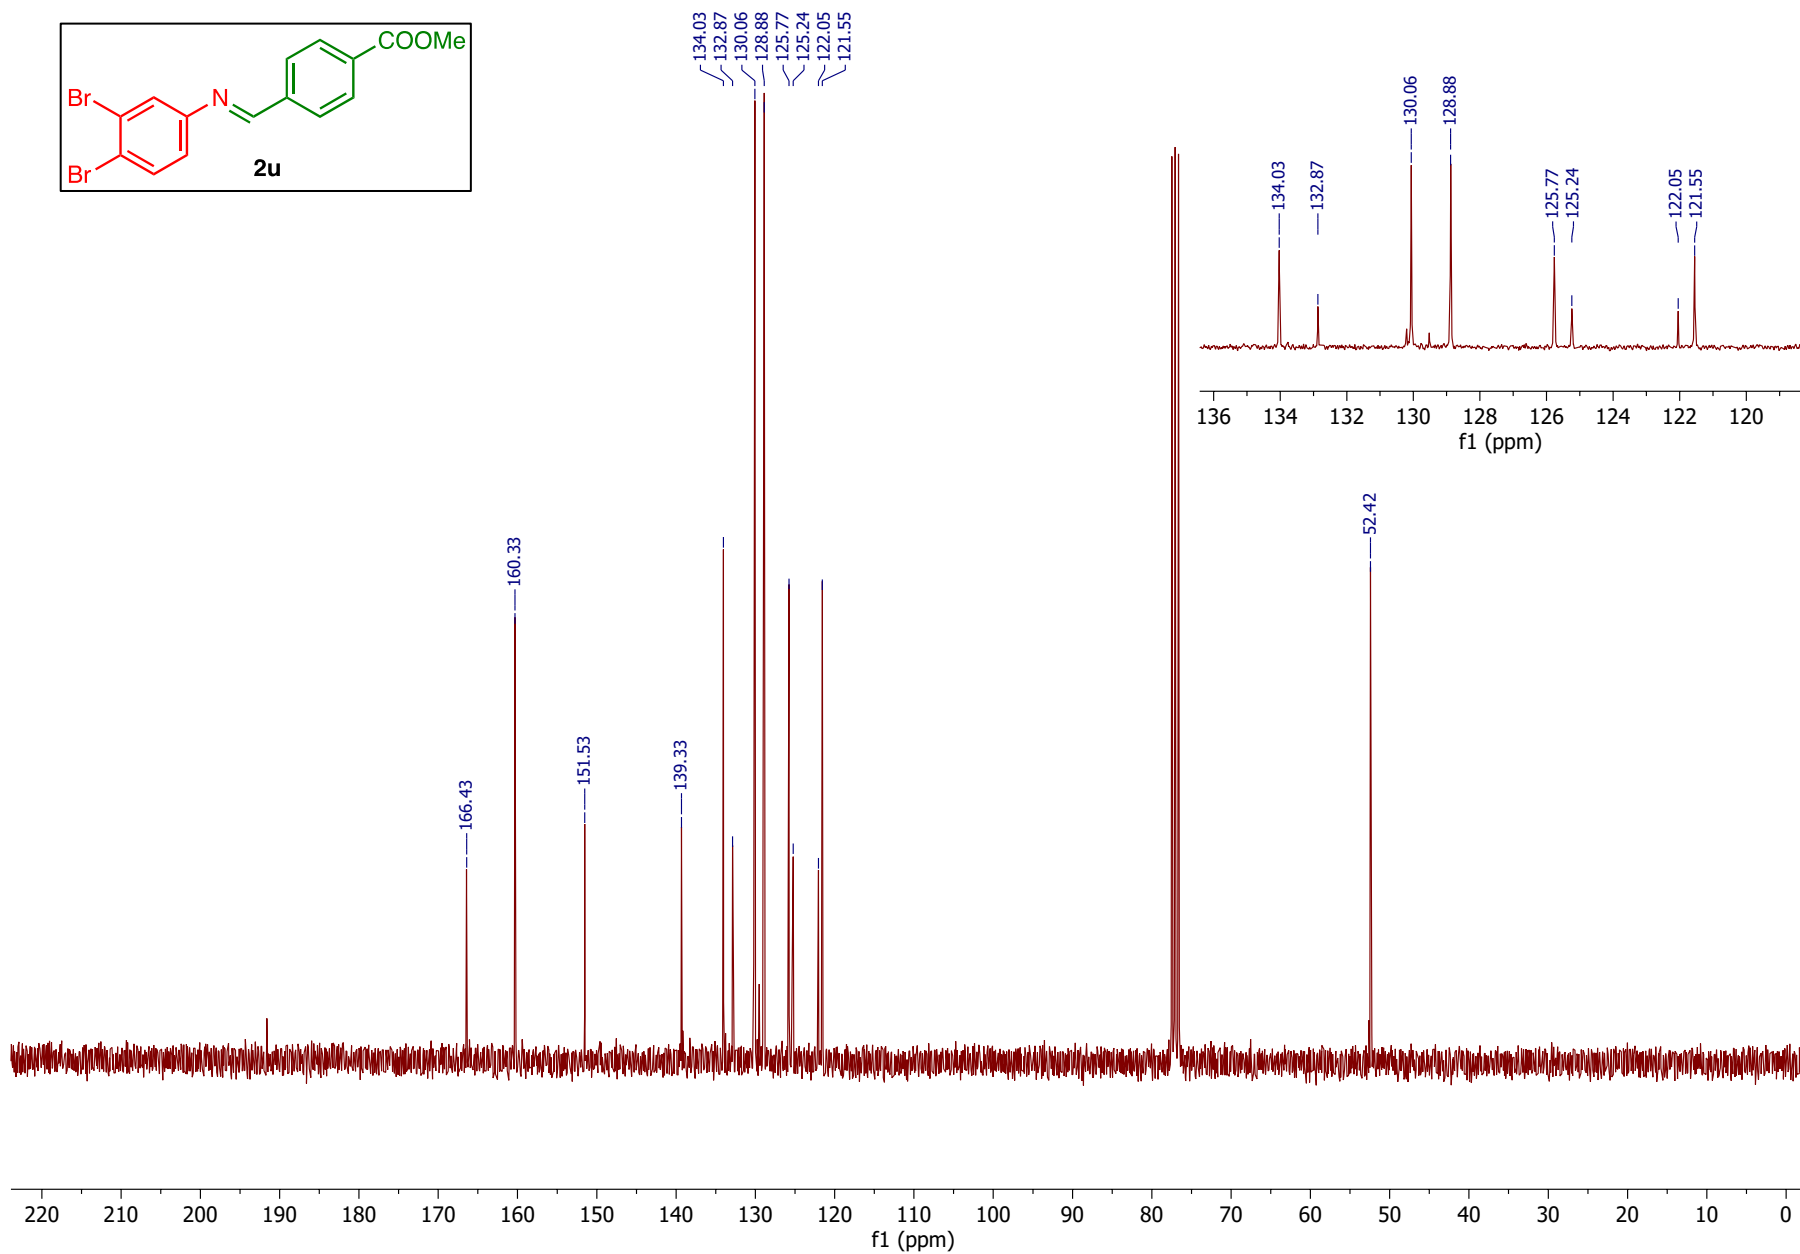

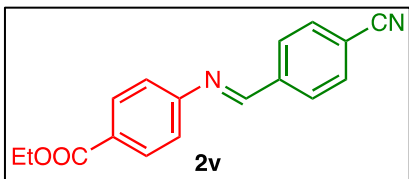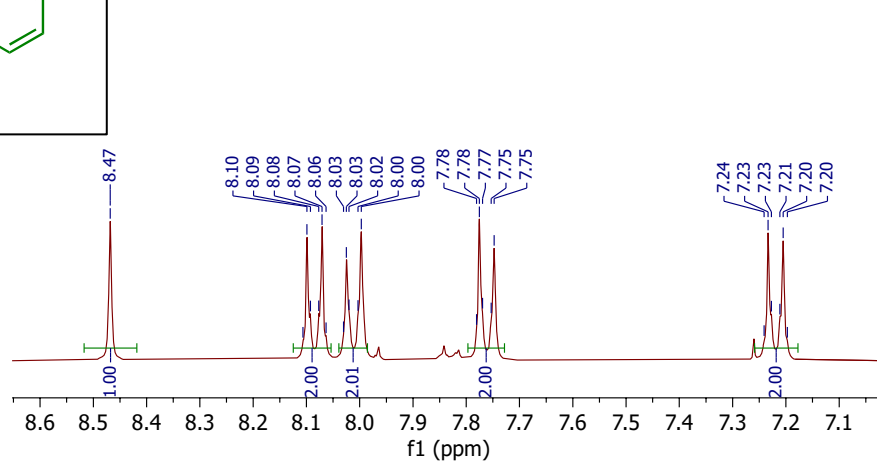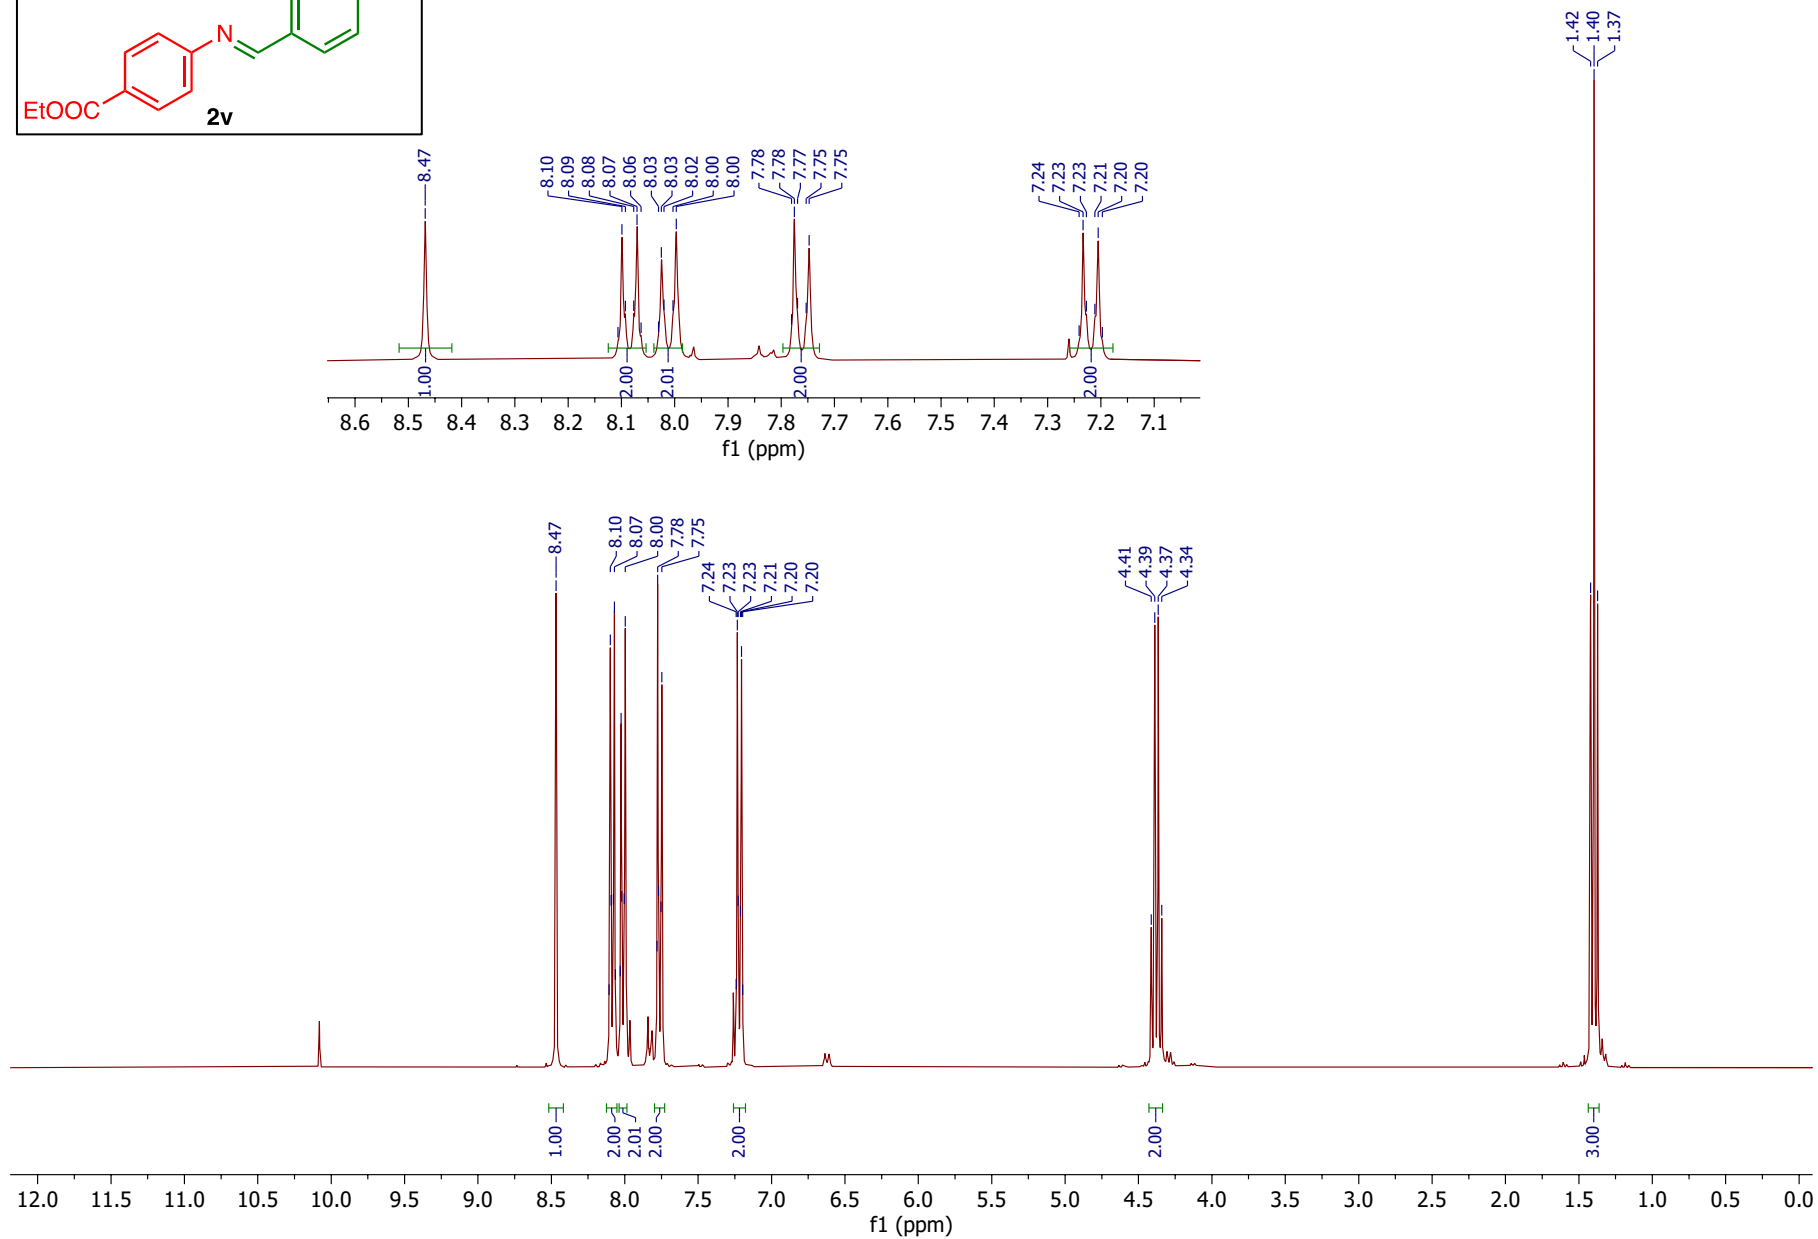

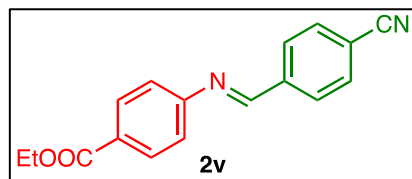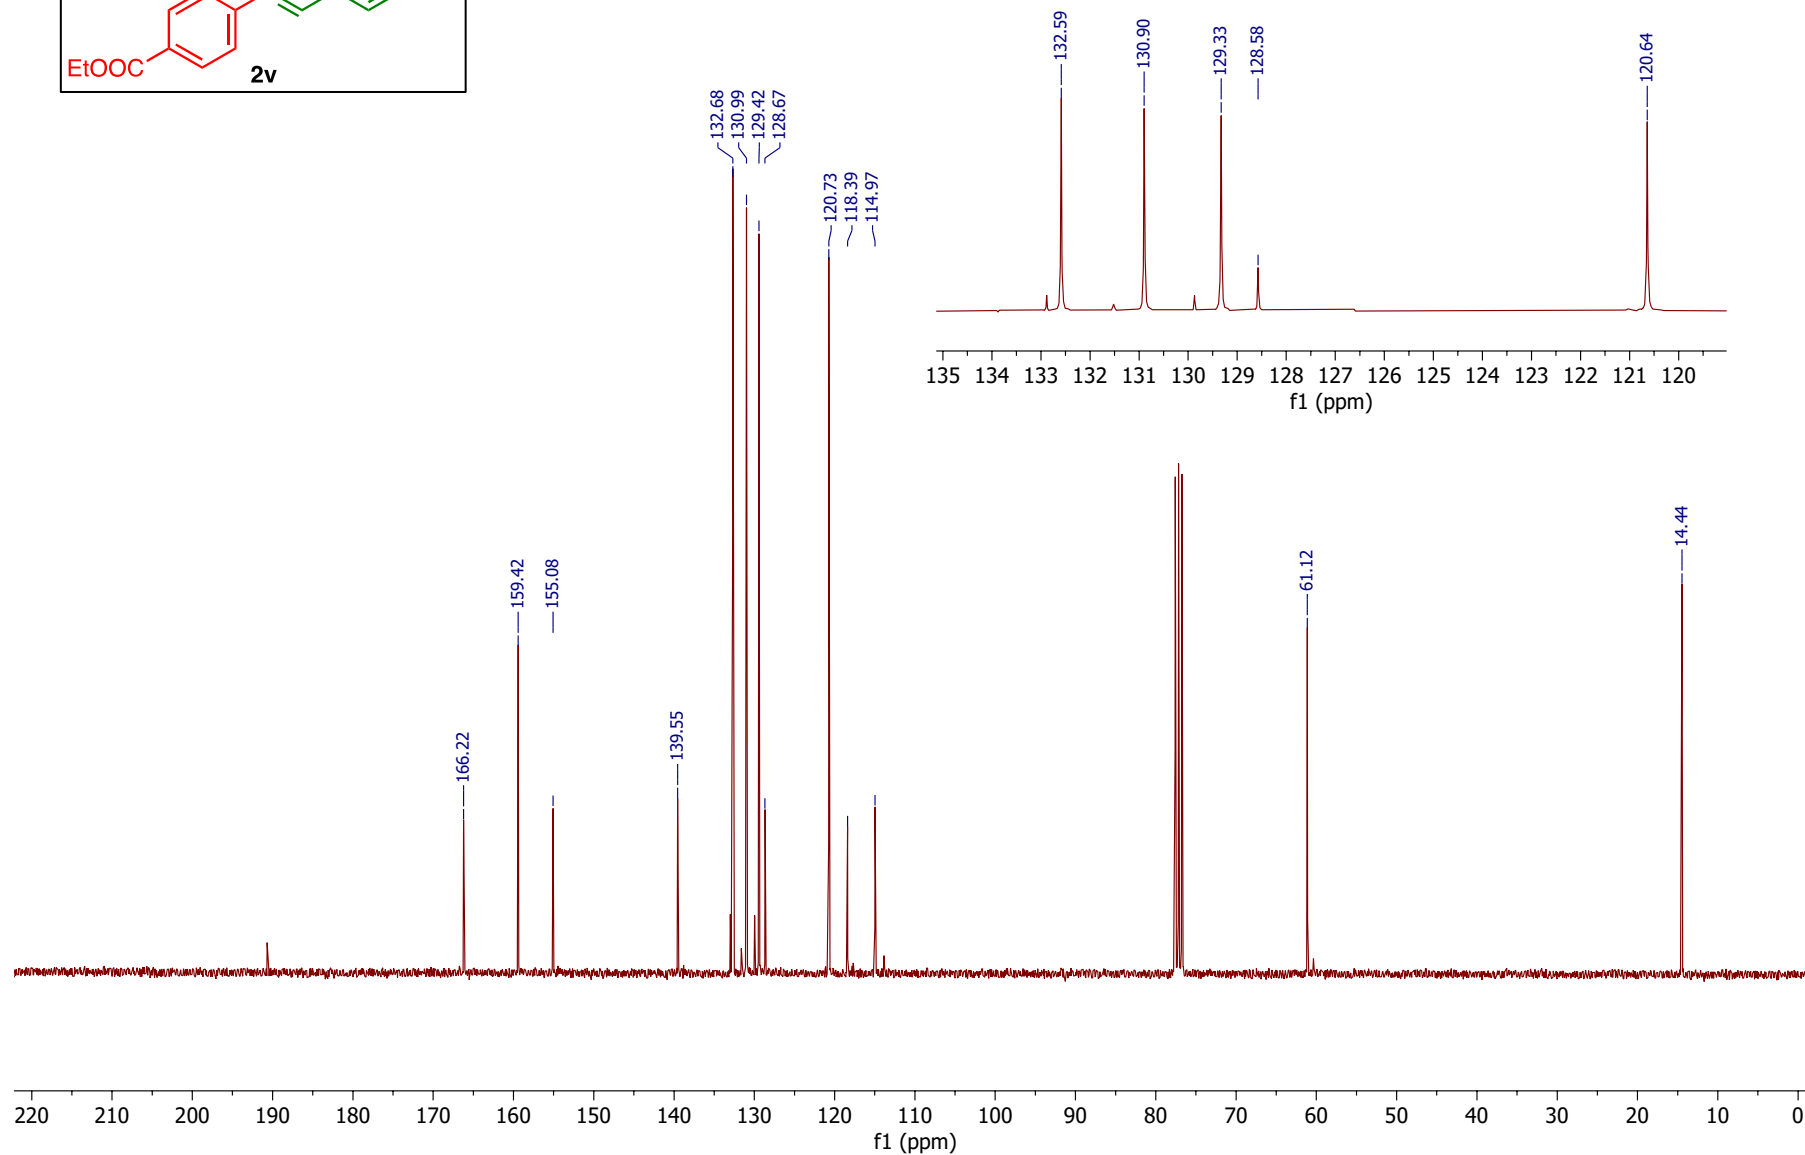

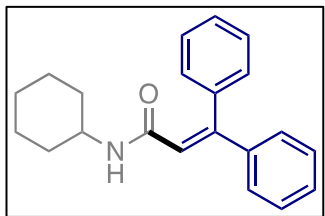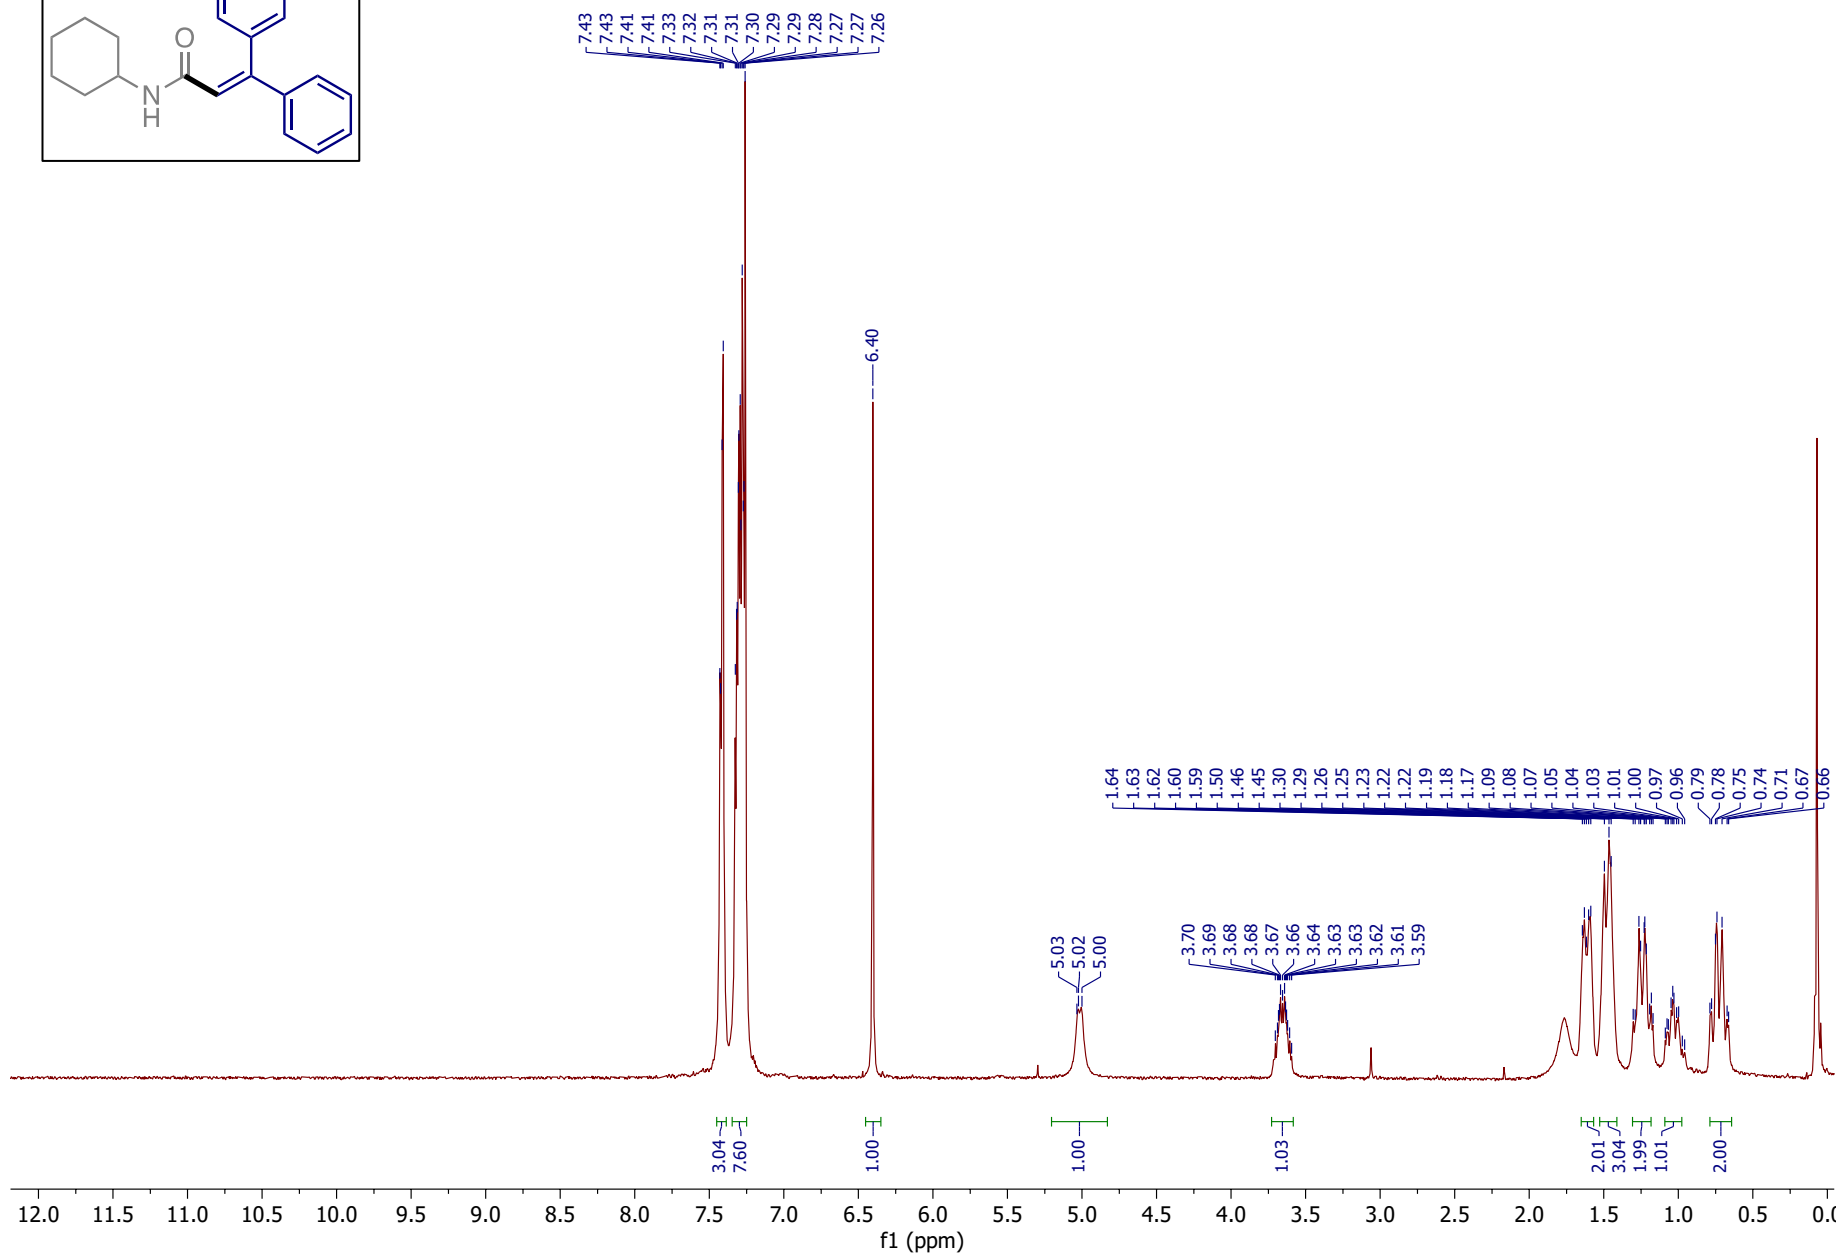

S36

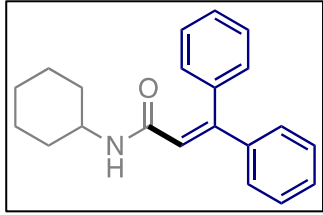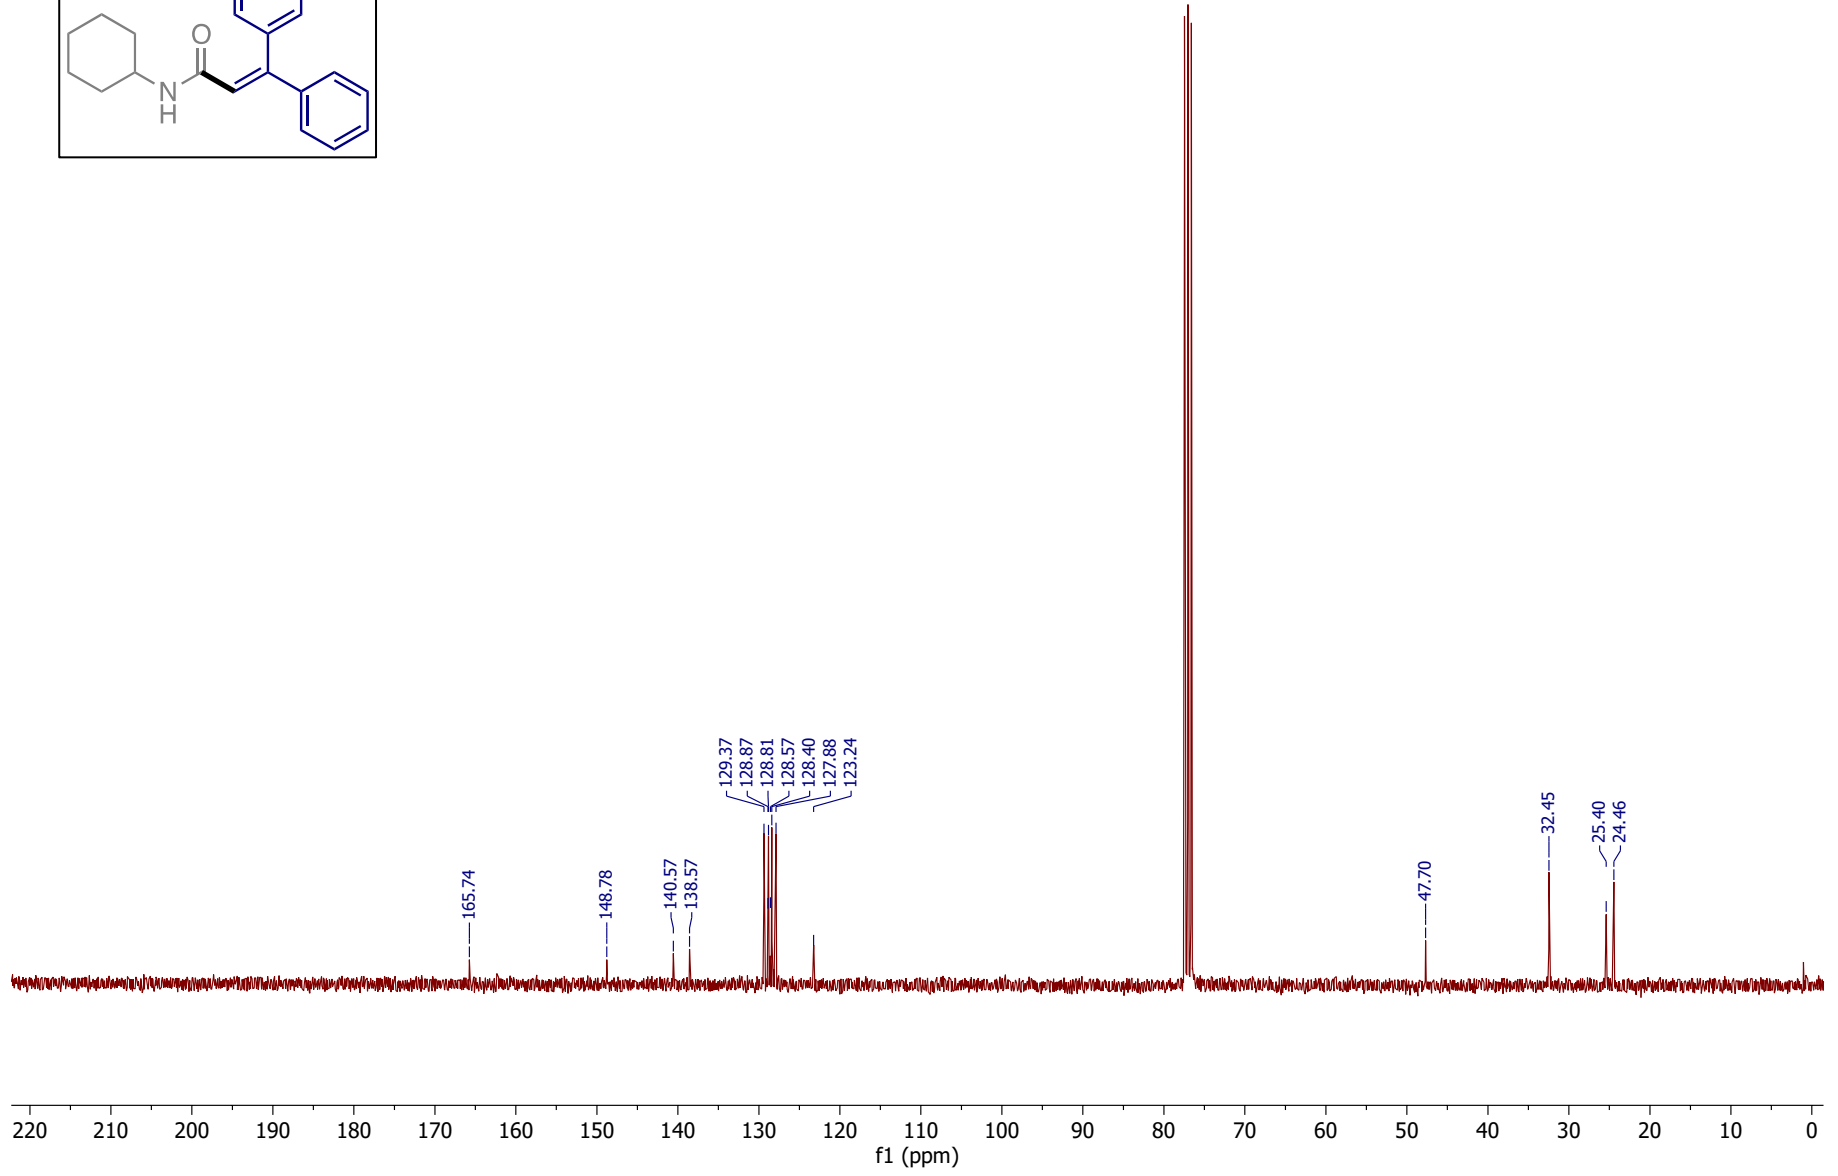

S37

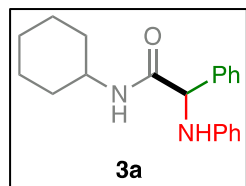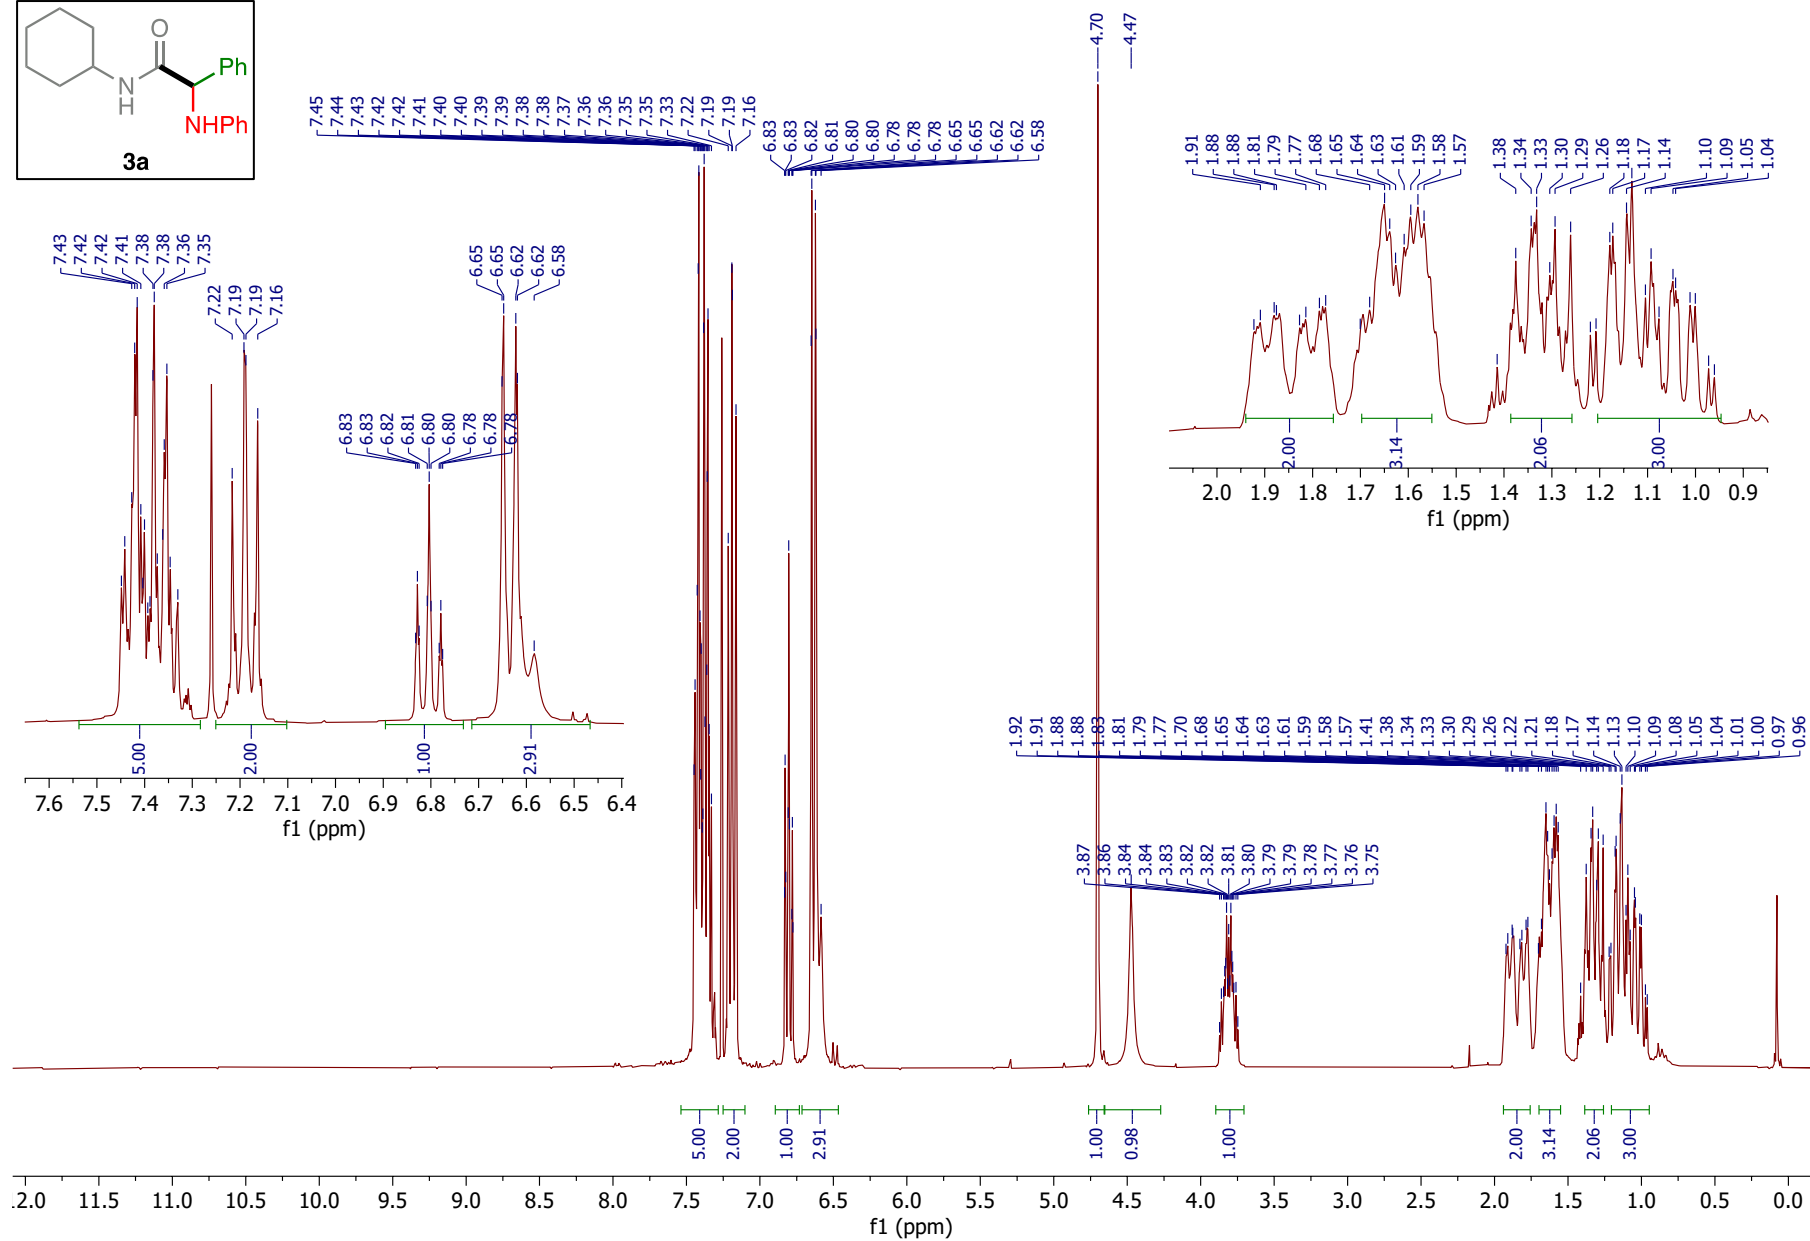

ME  
13

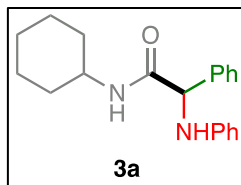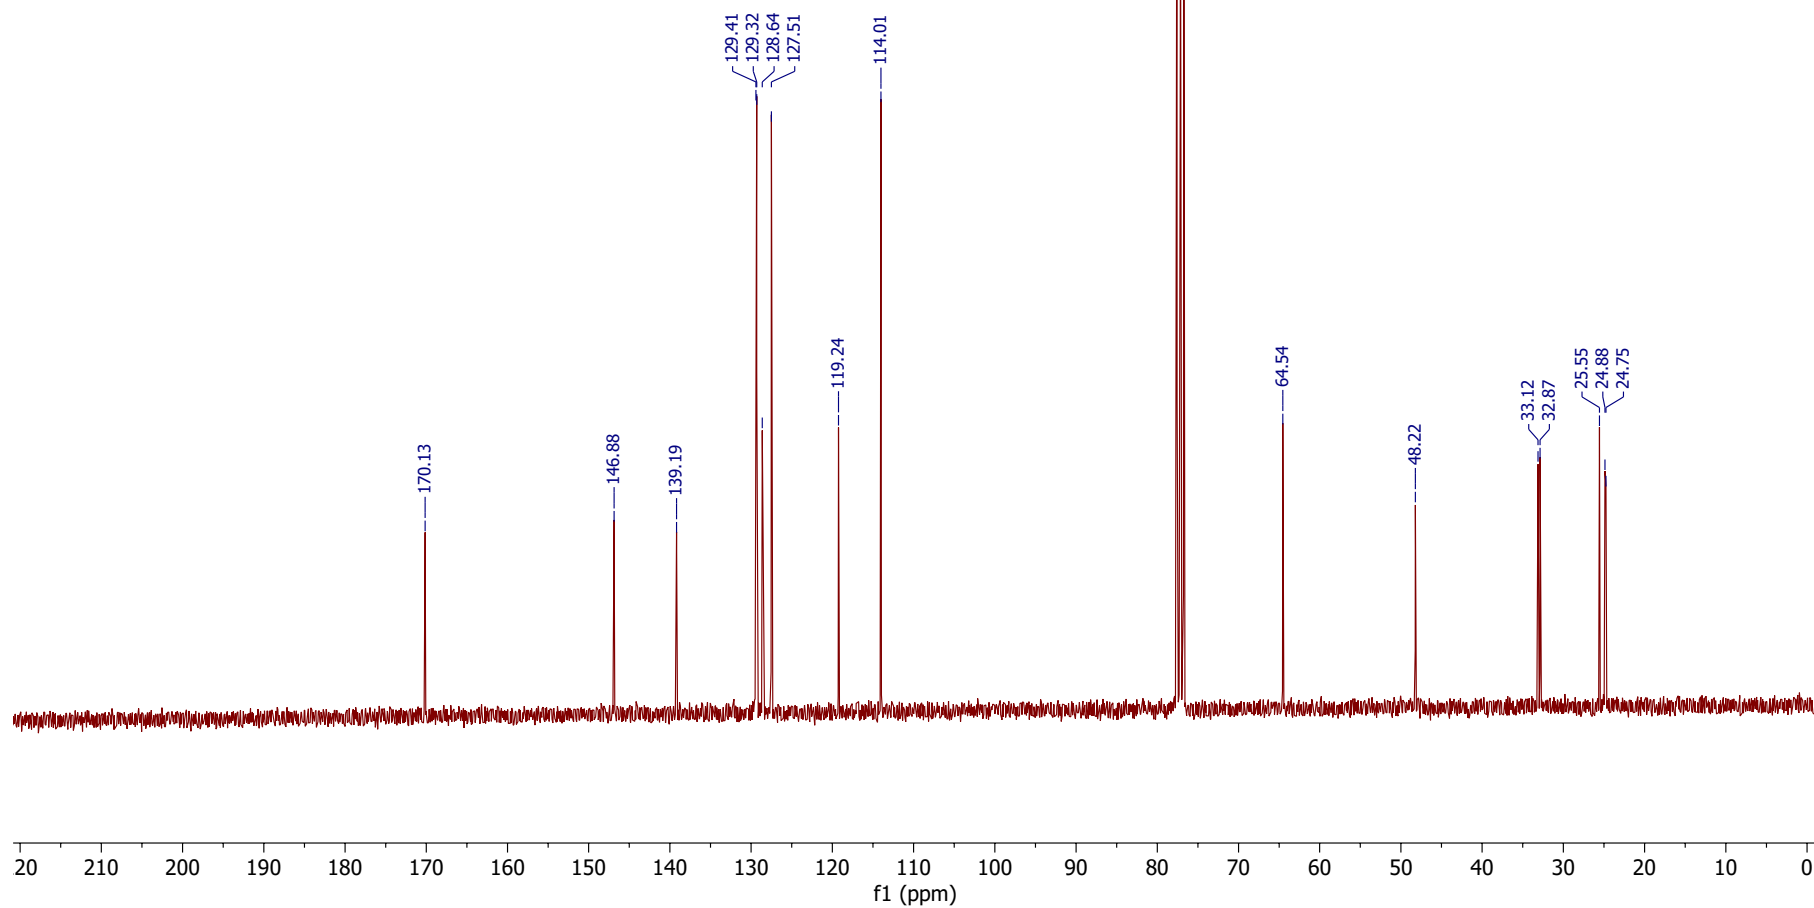

S39



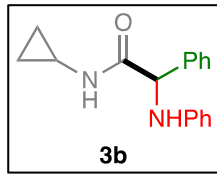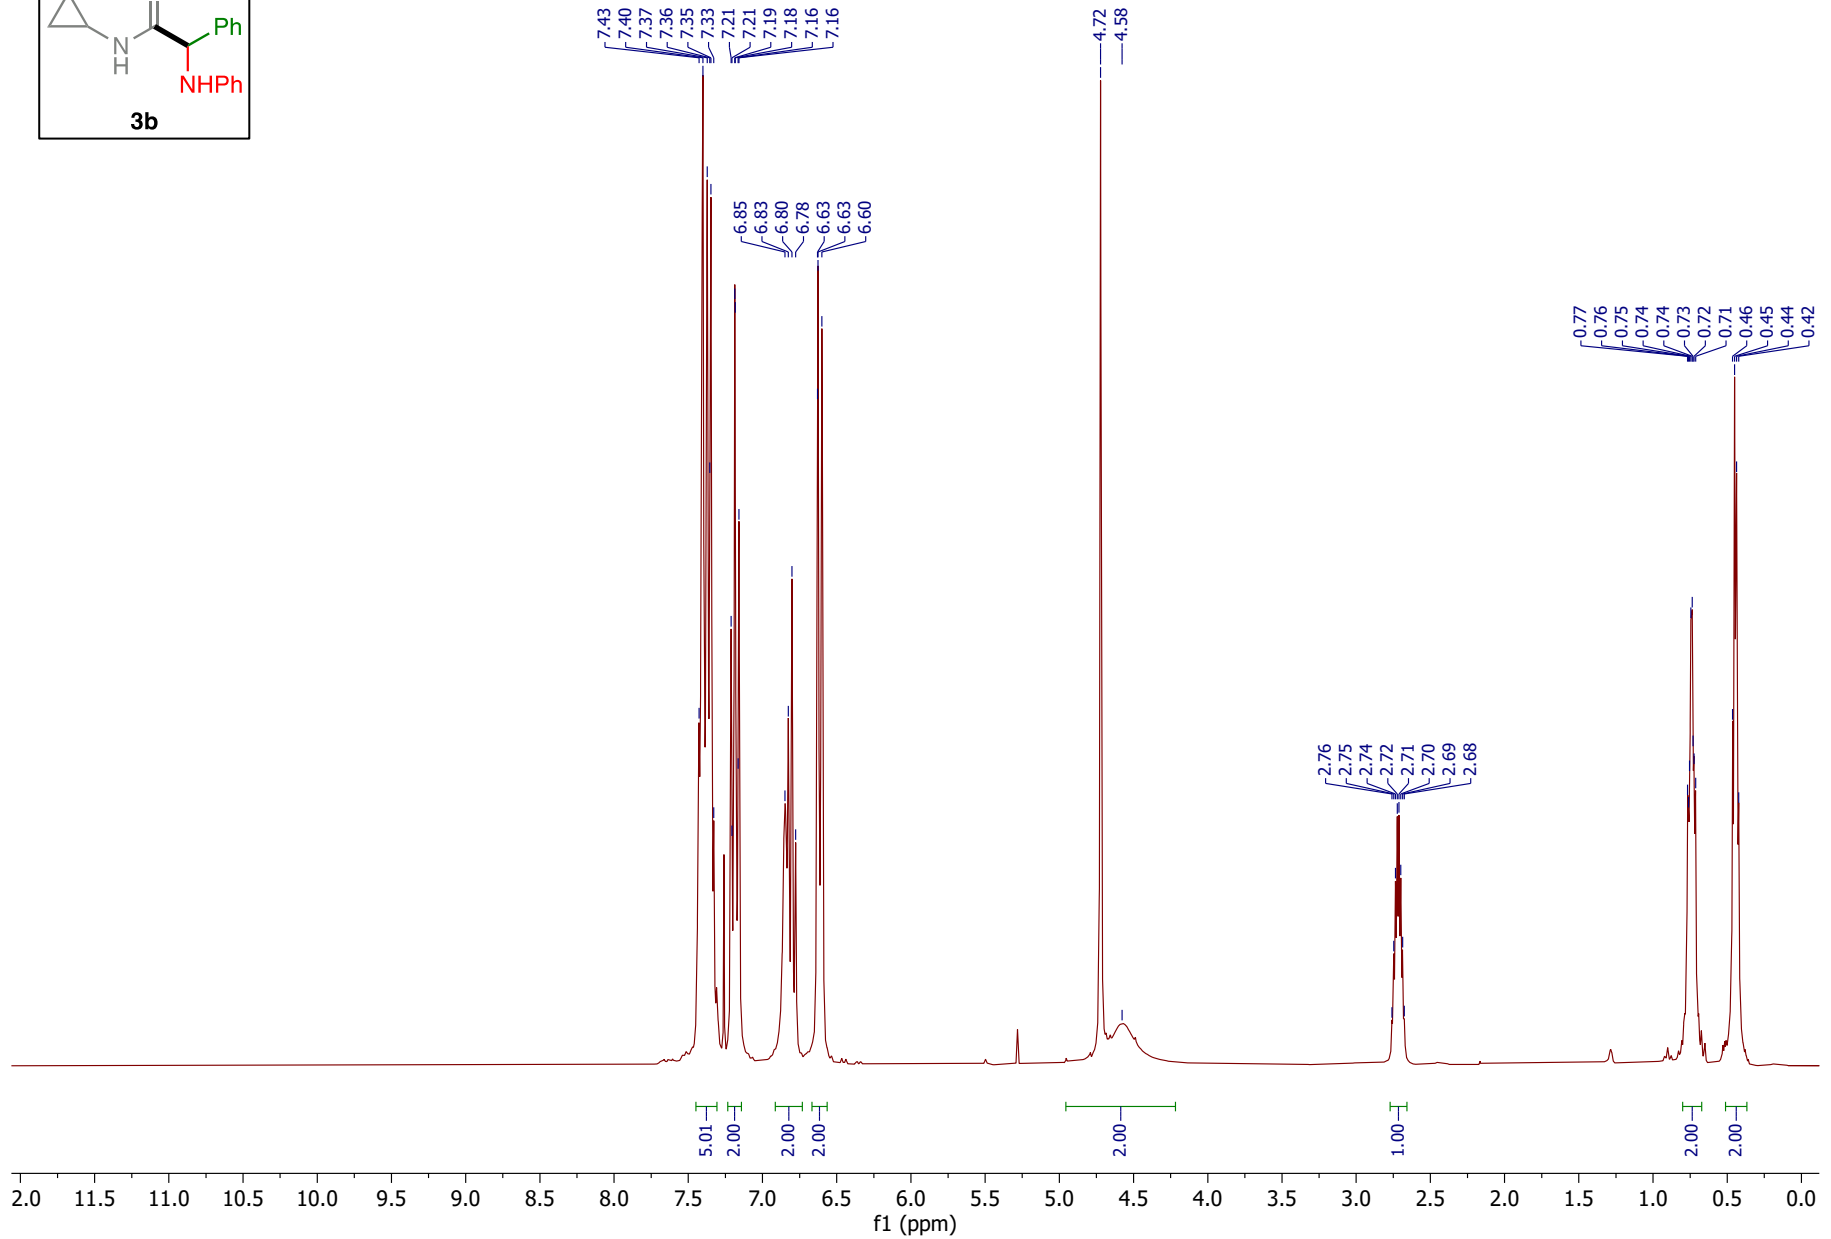

S40

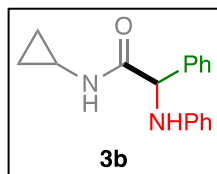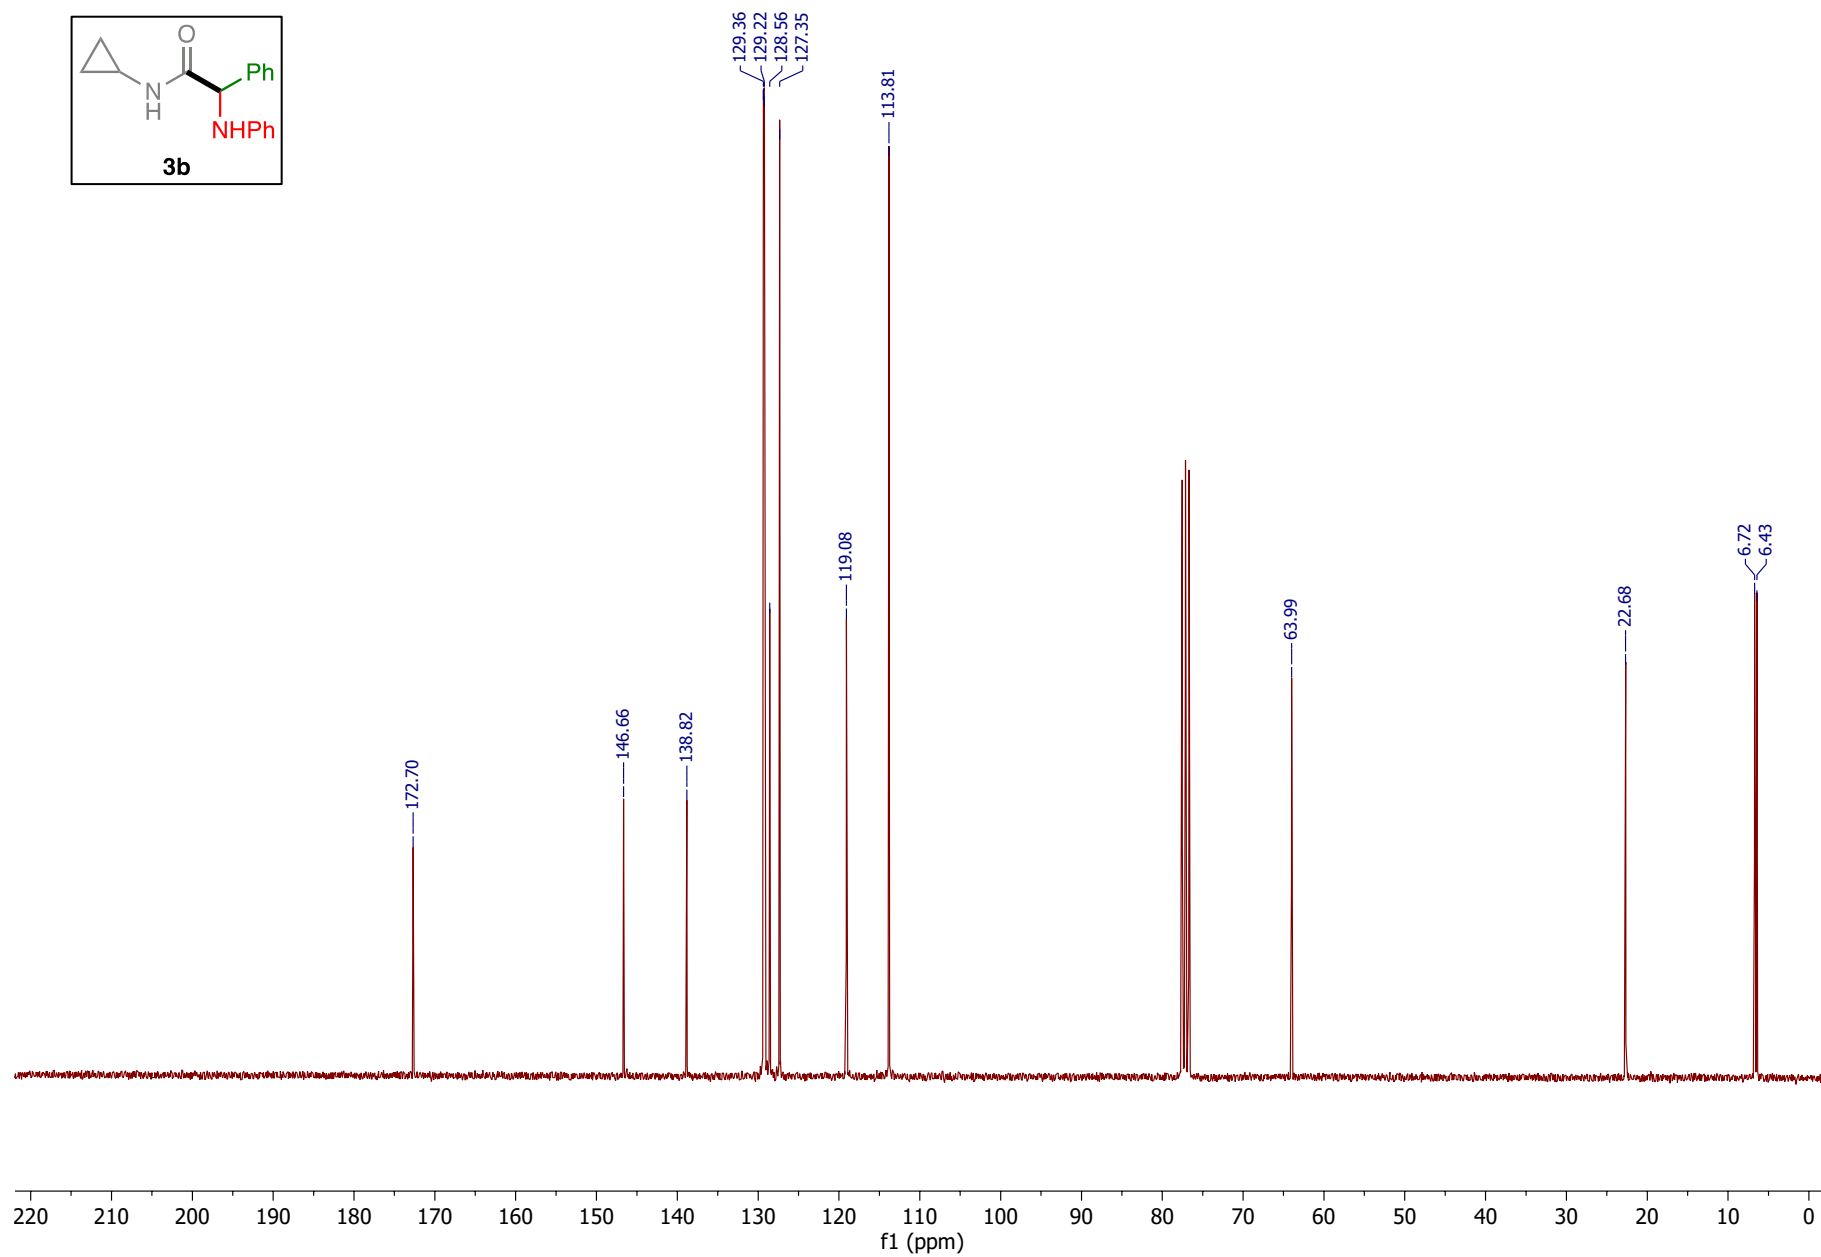

S41

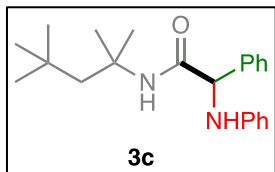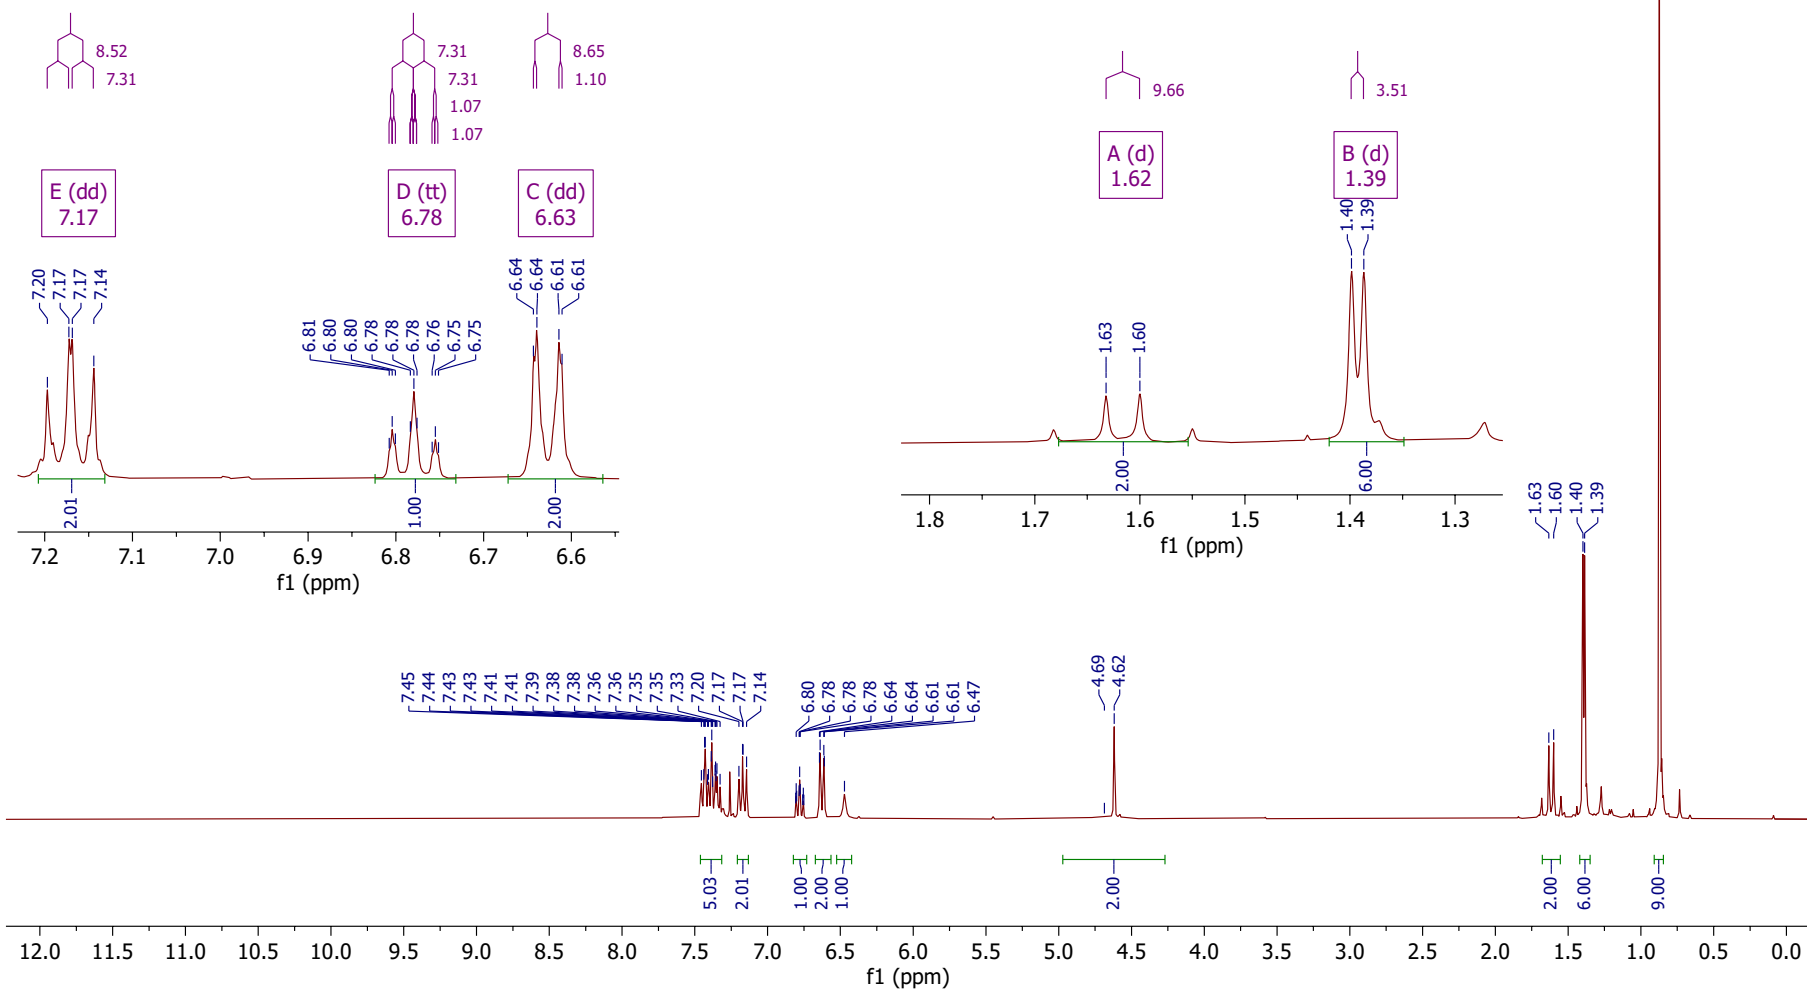

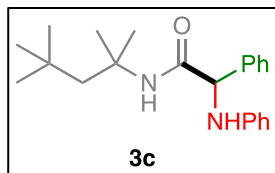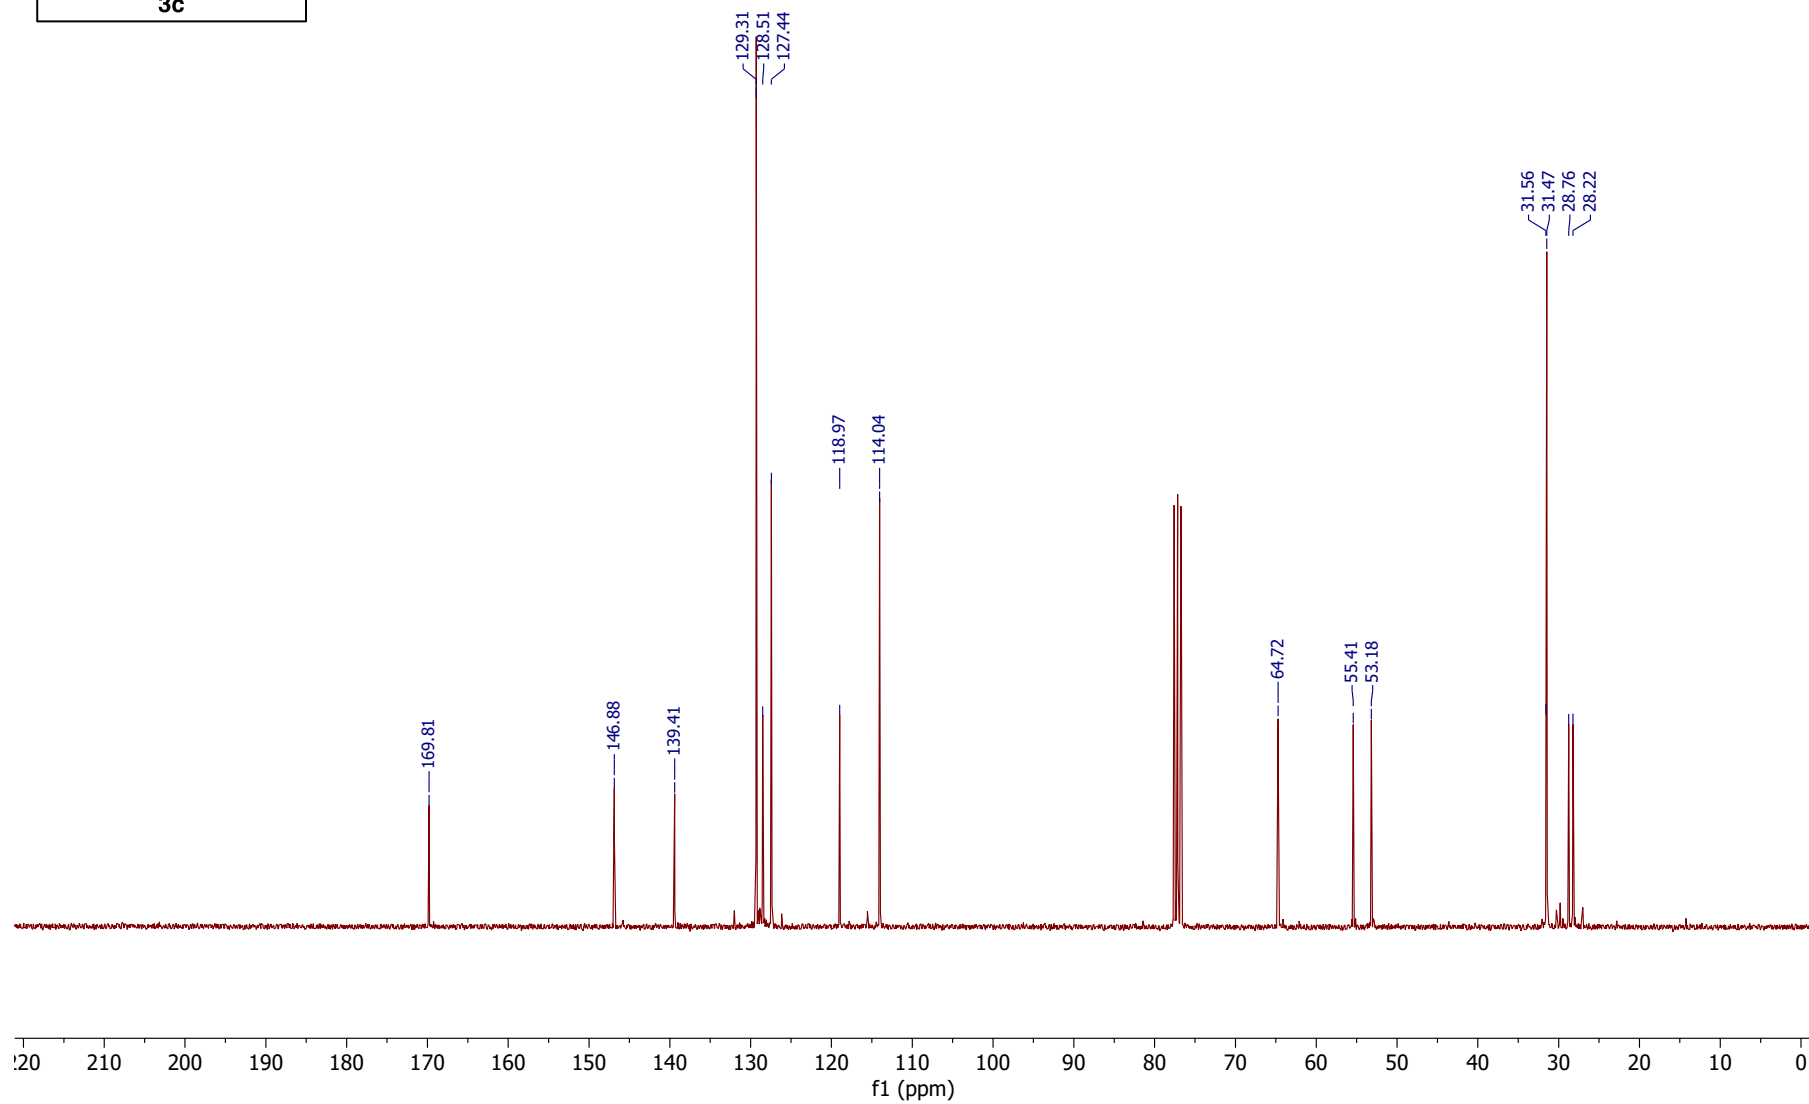

S43

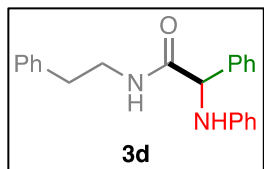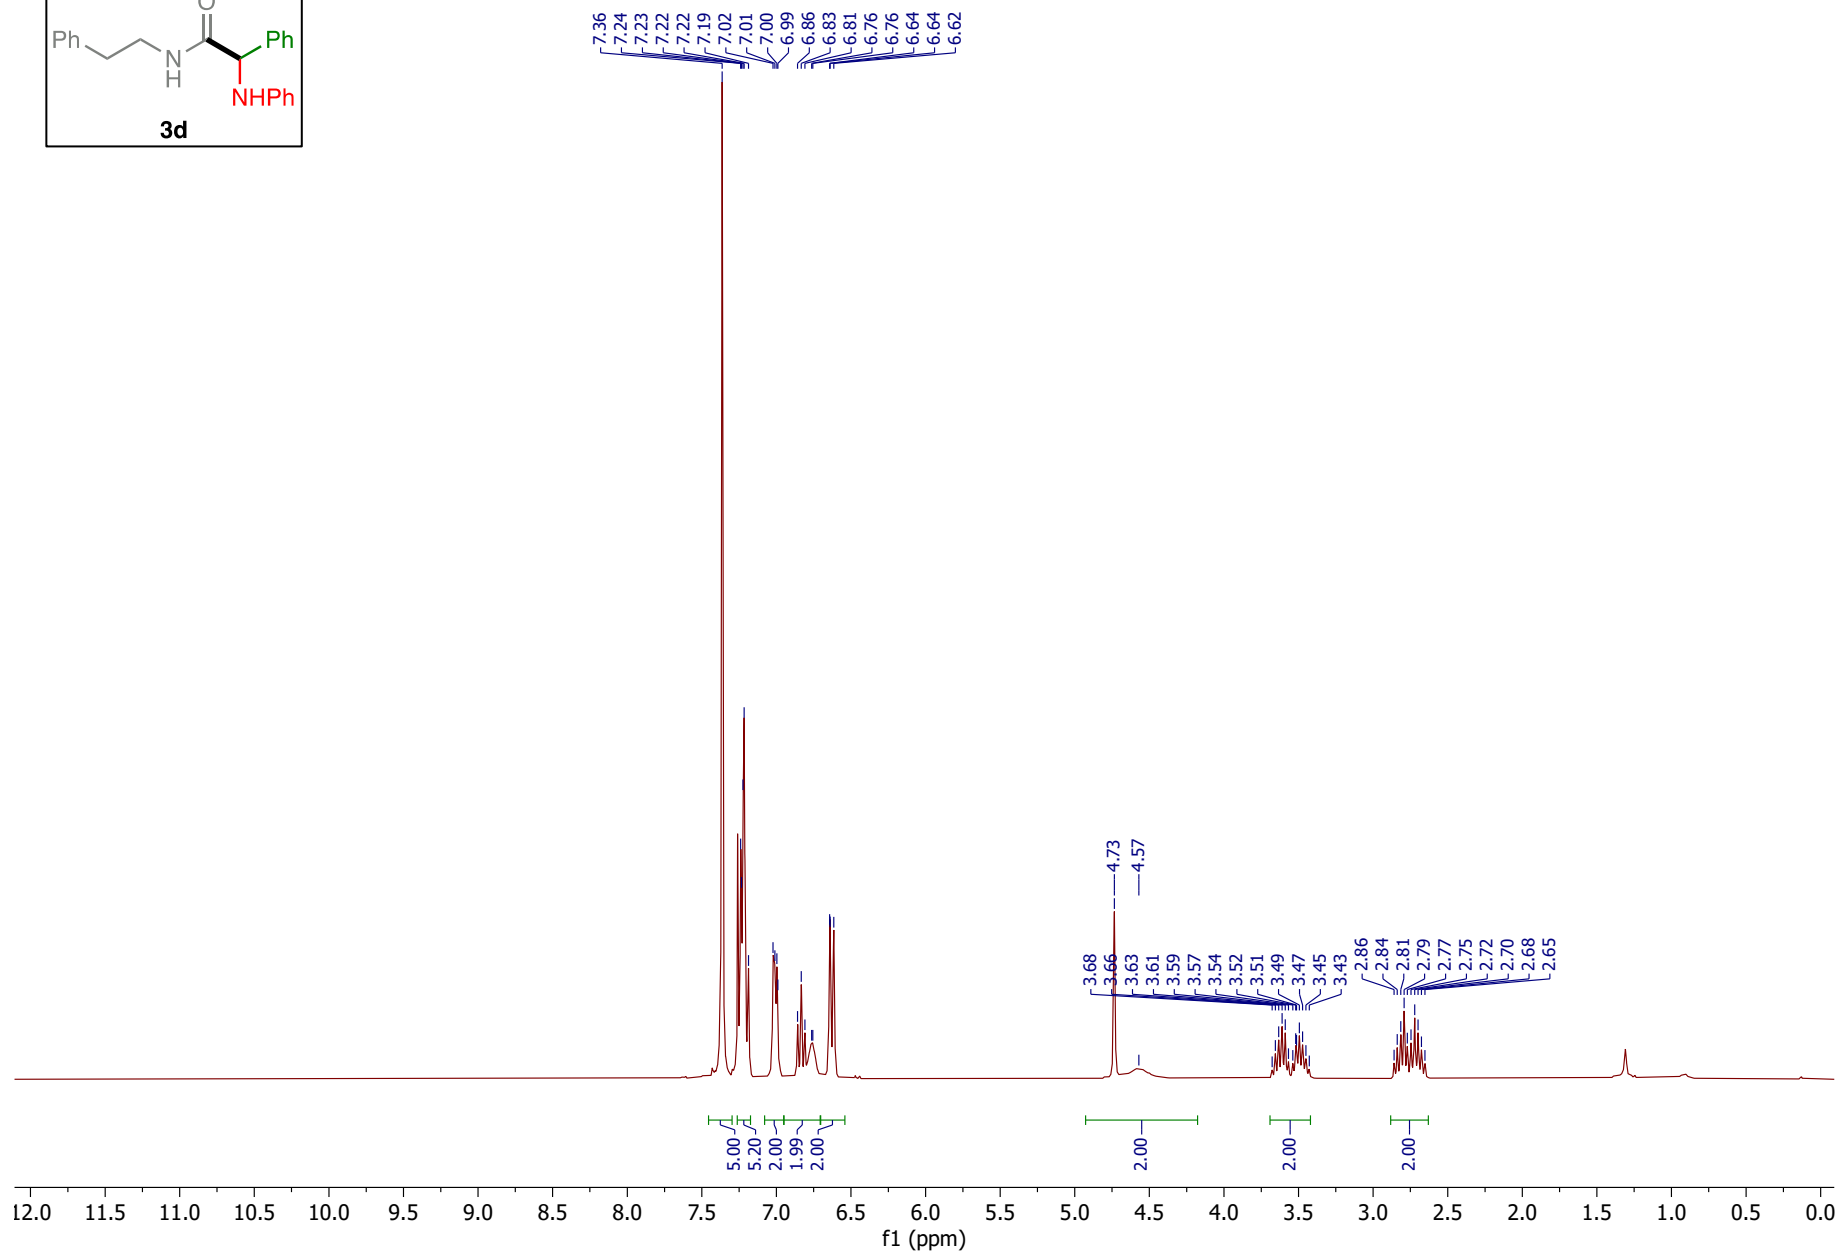

S44

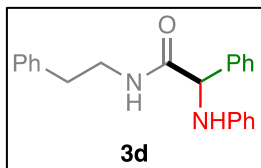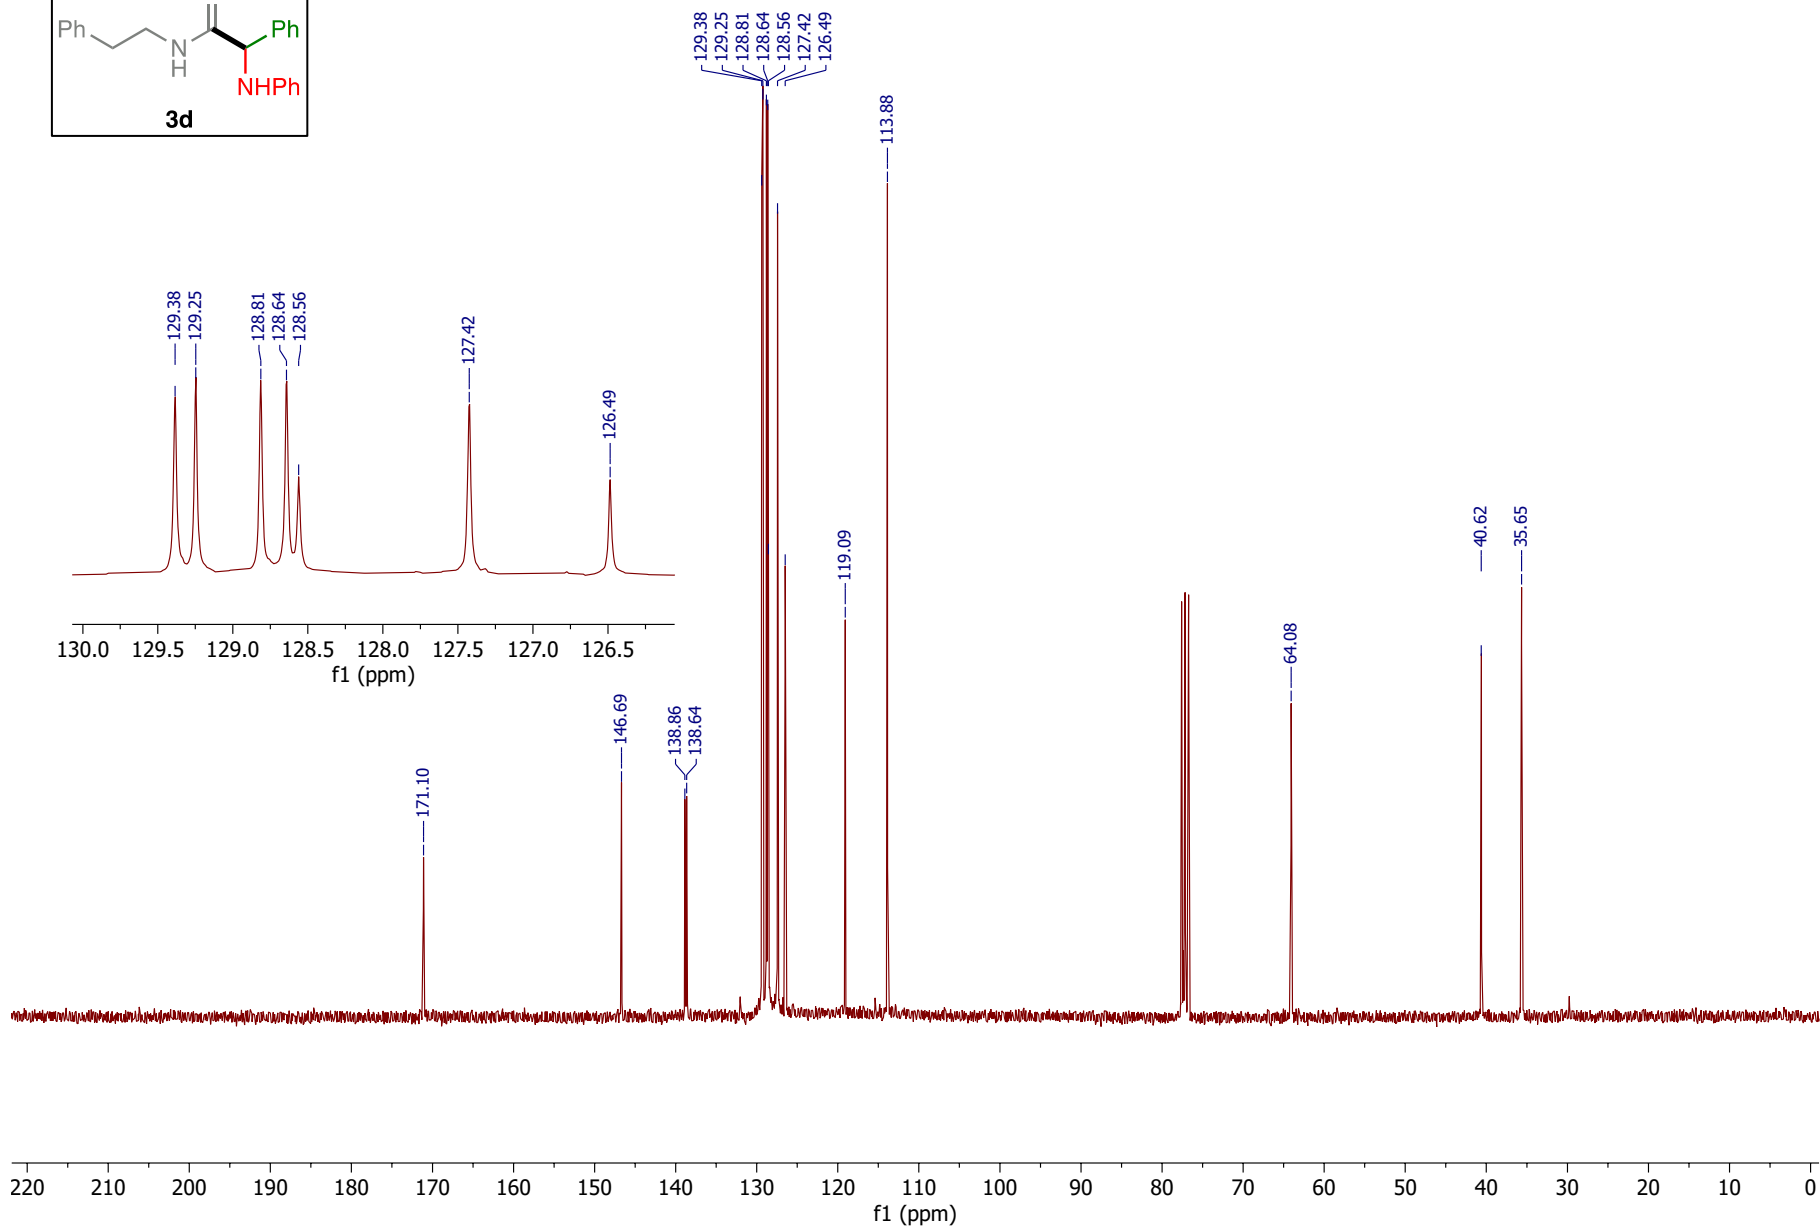

S45

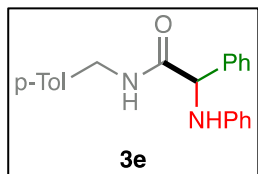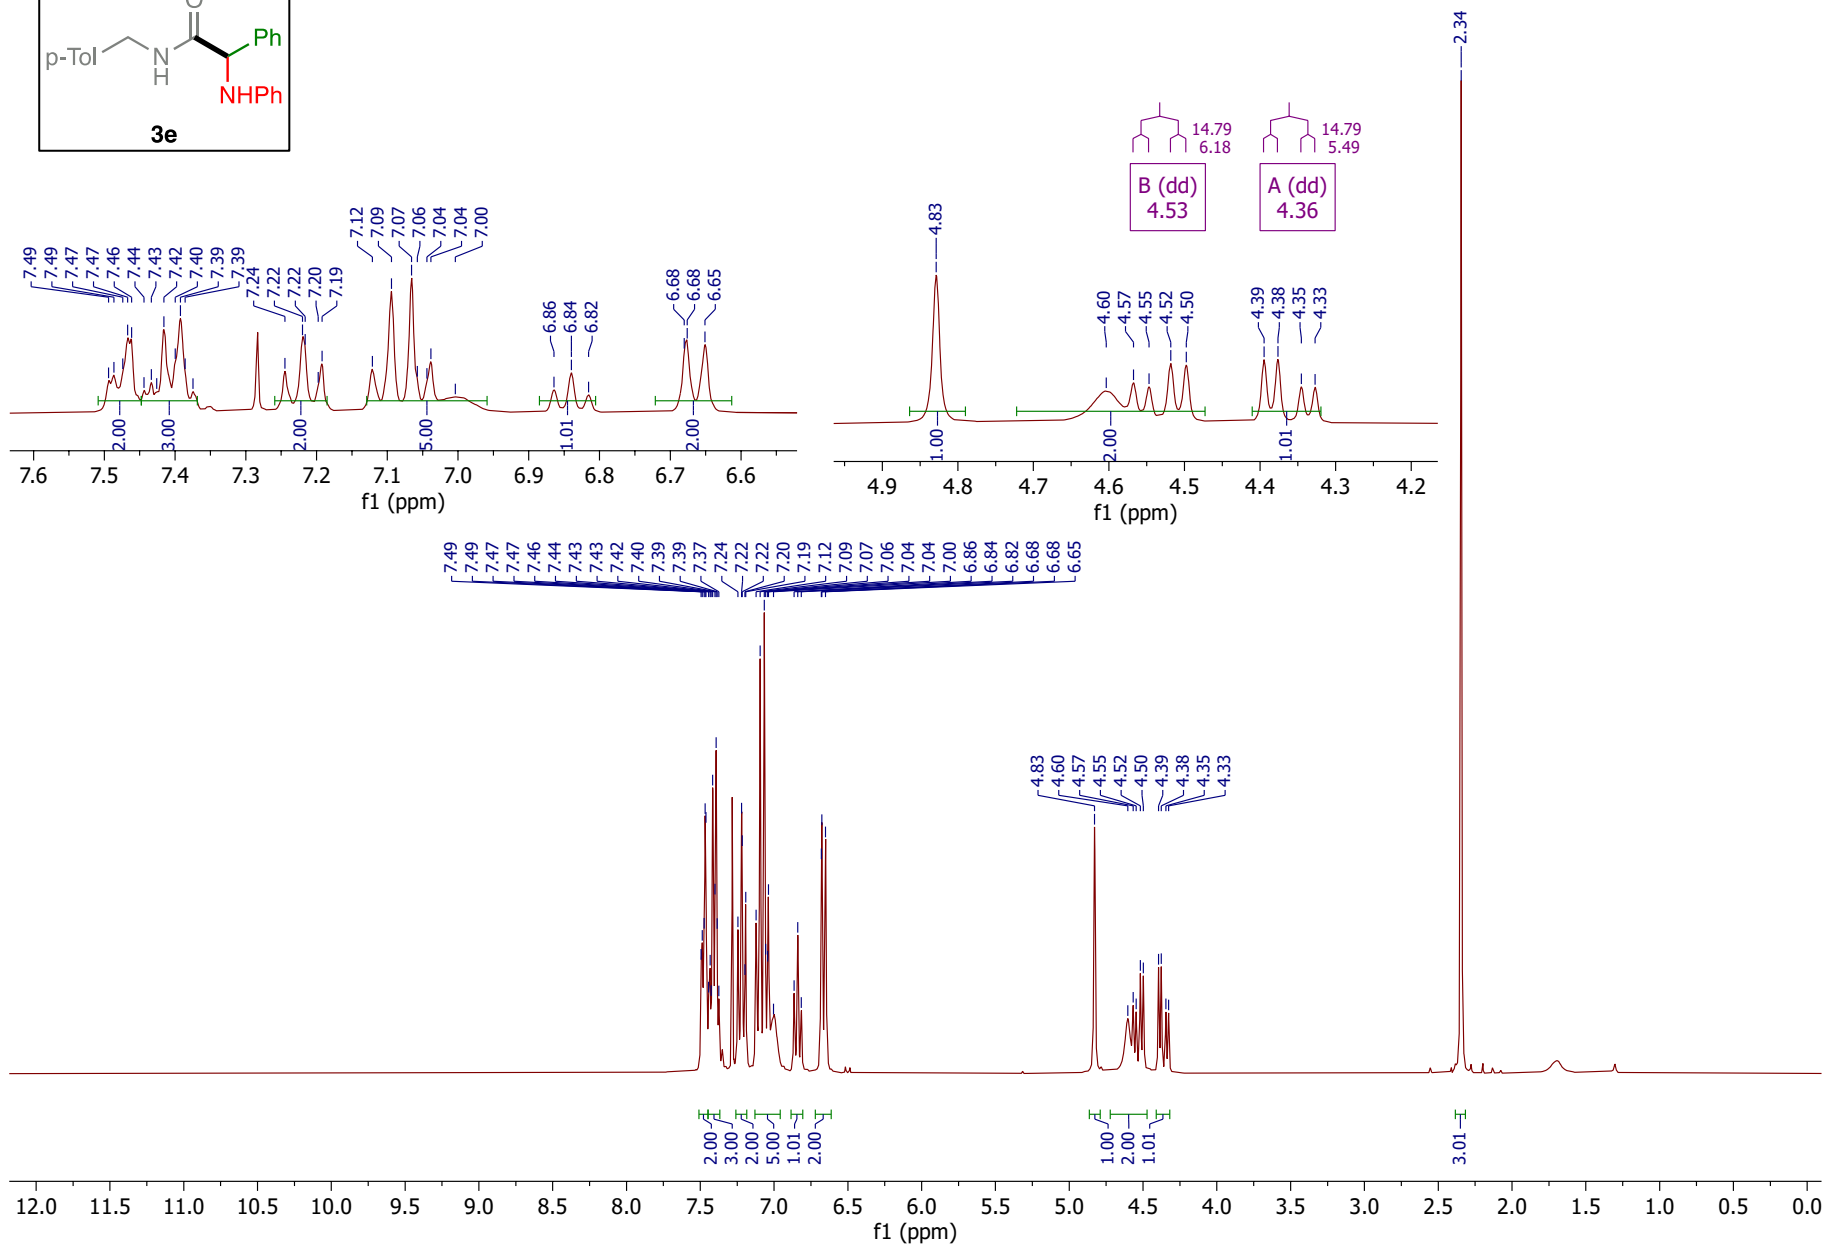

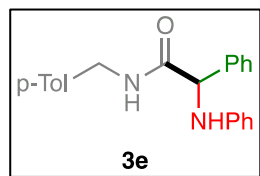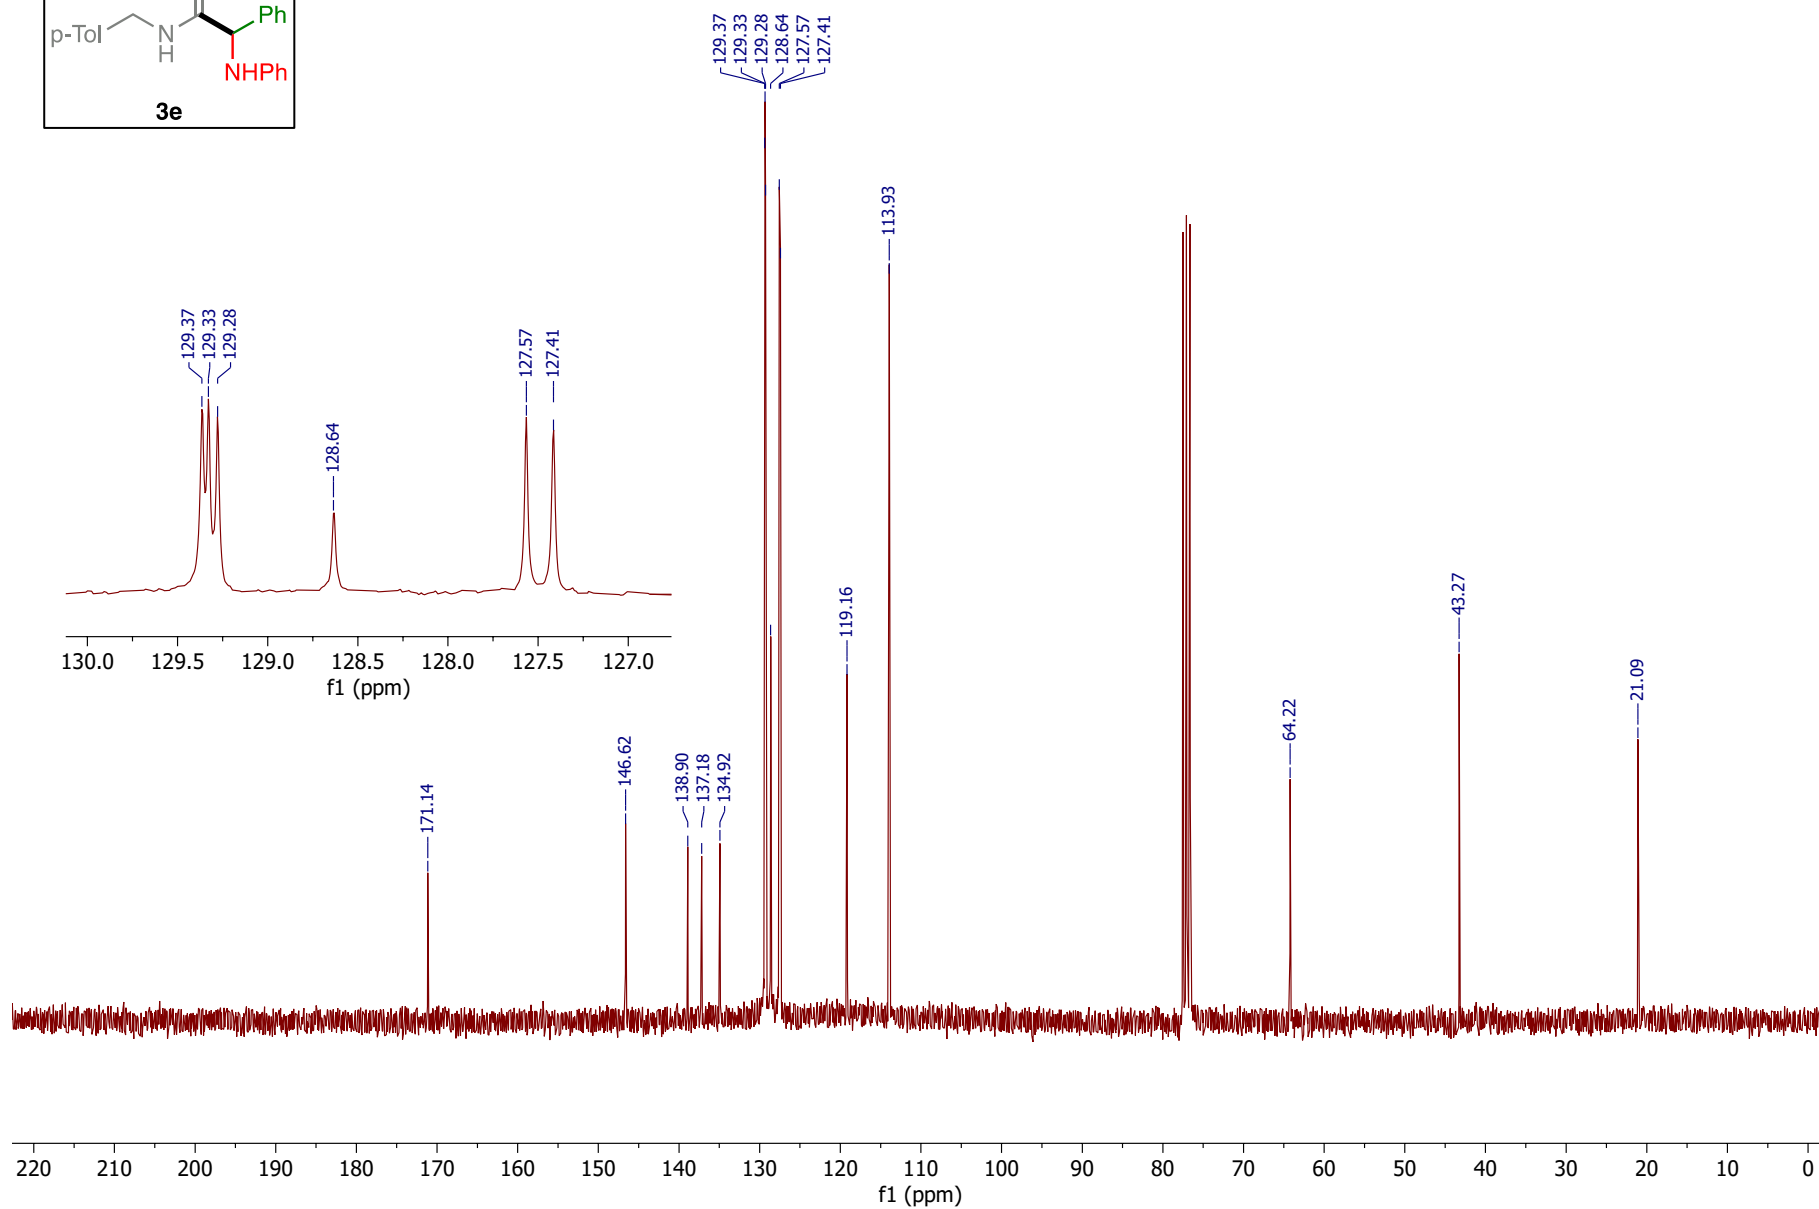



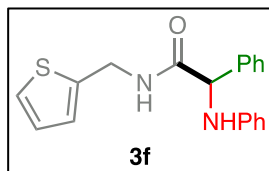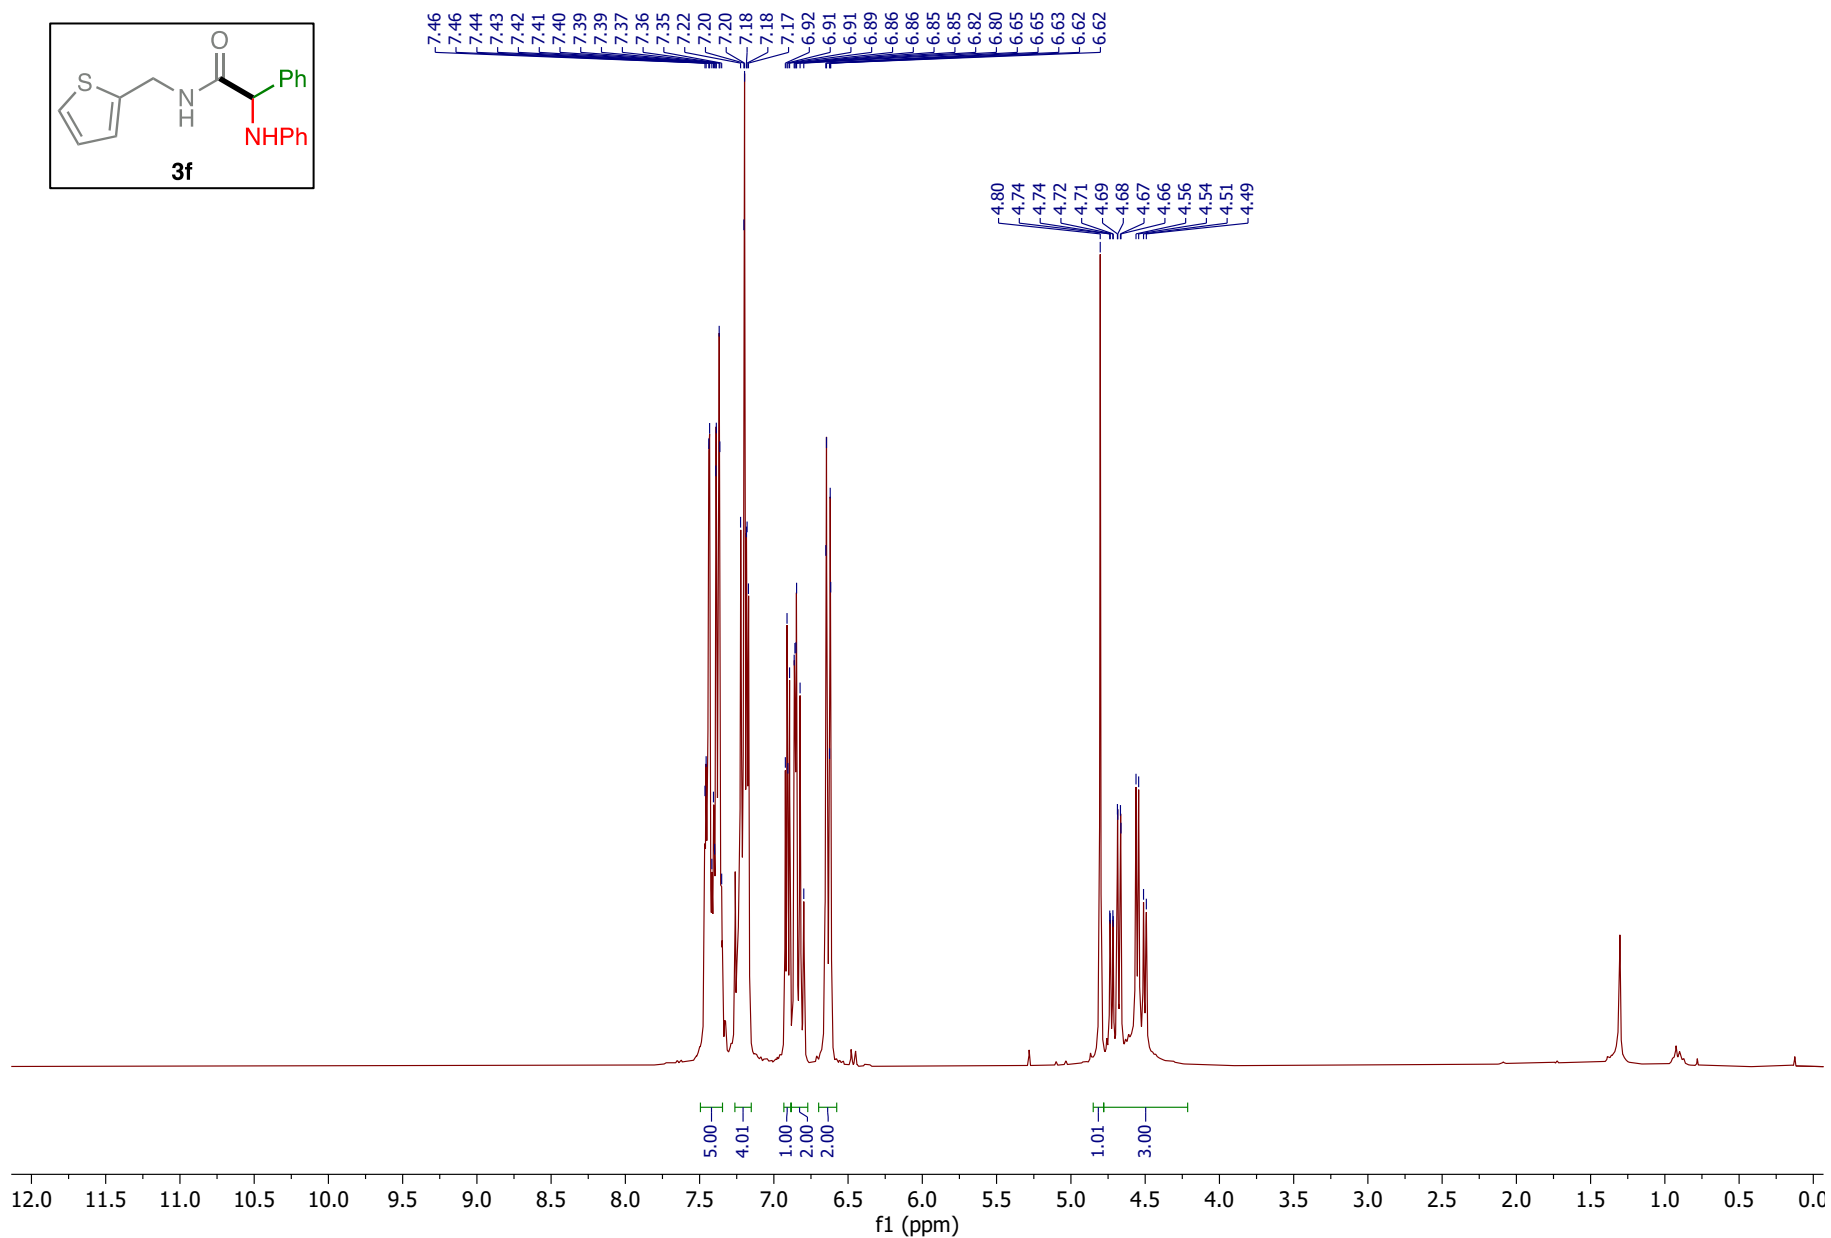

S48

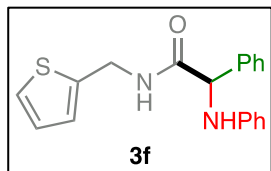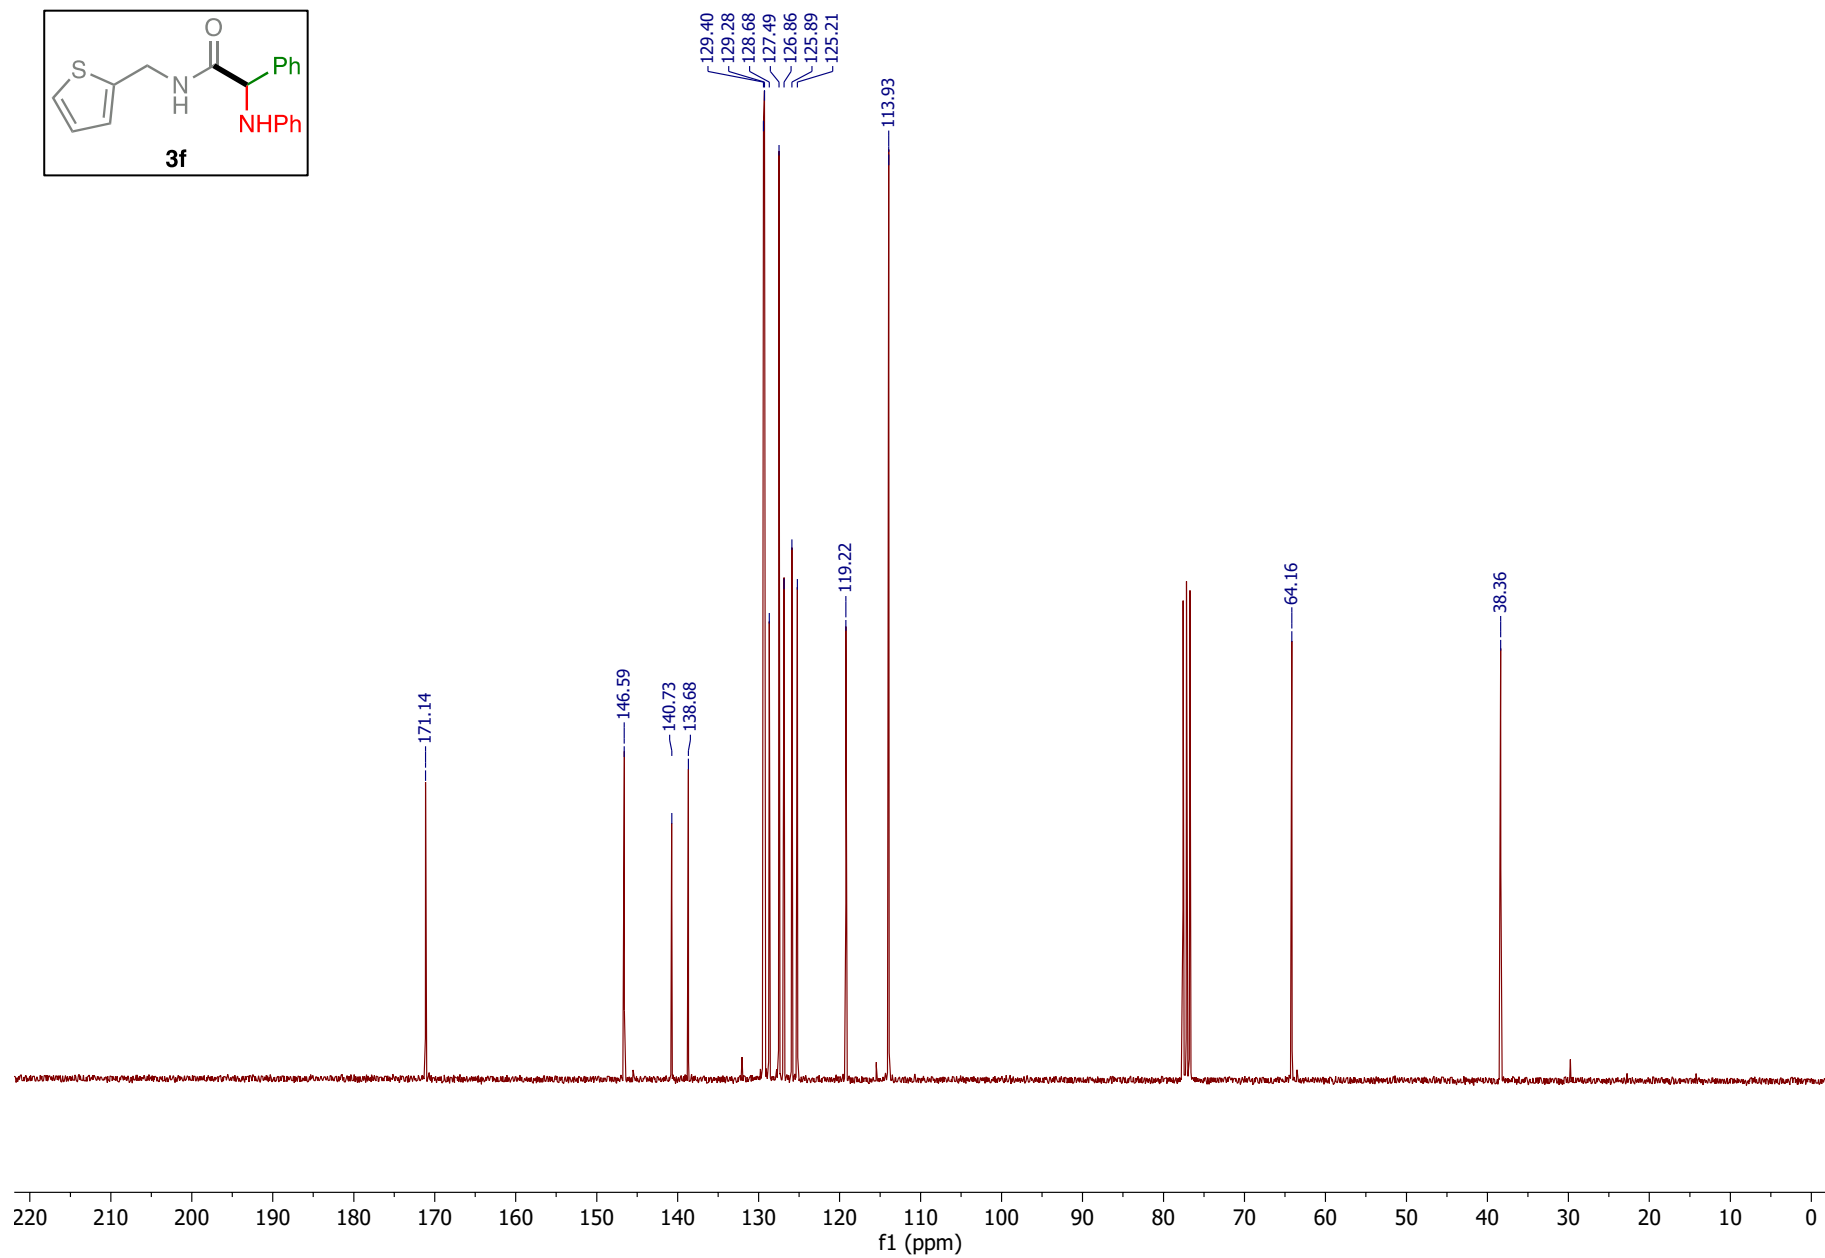

S49

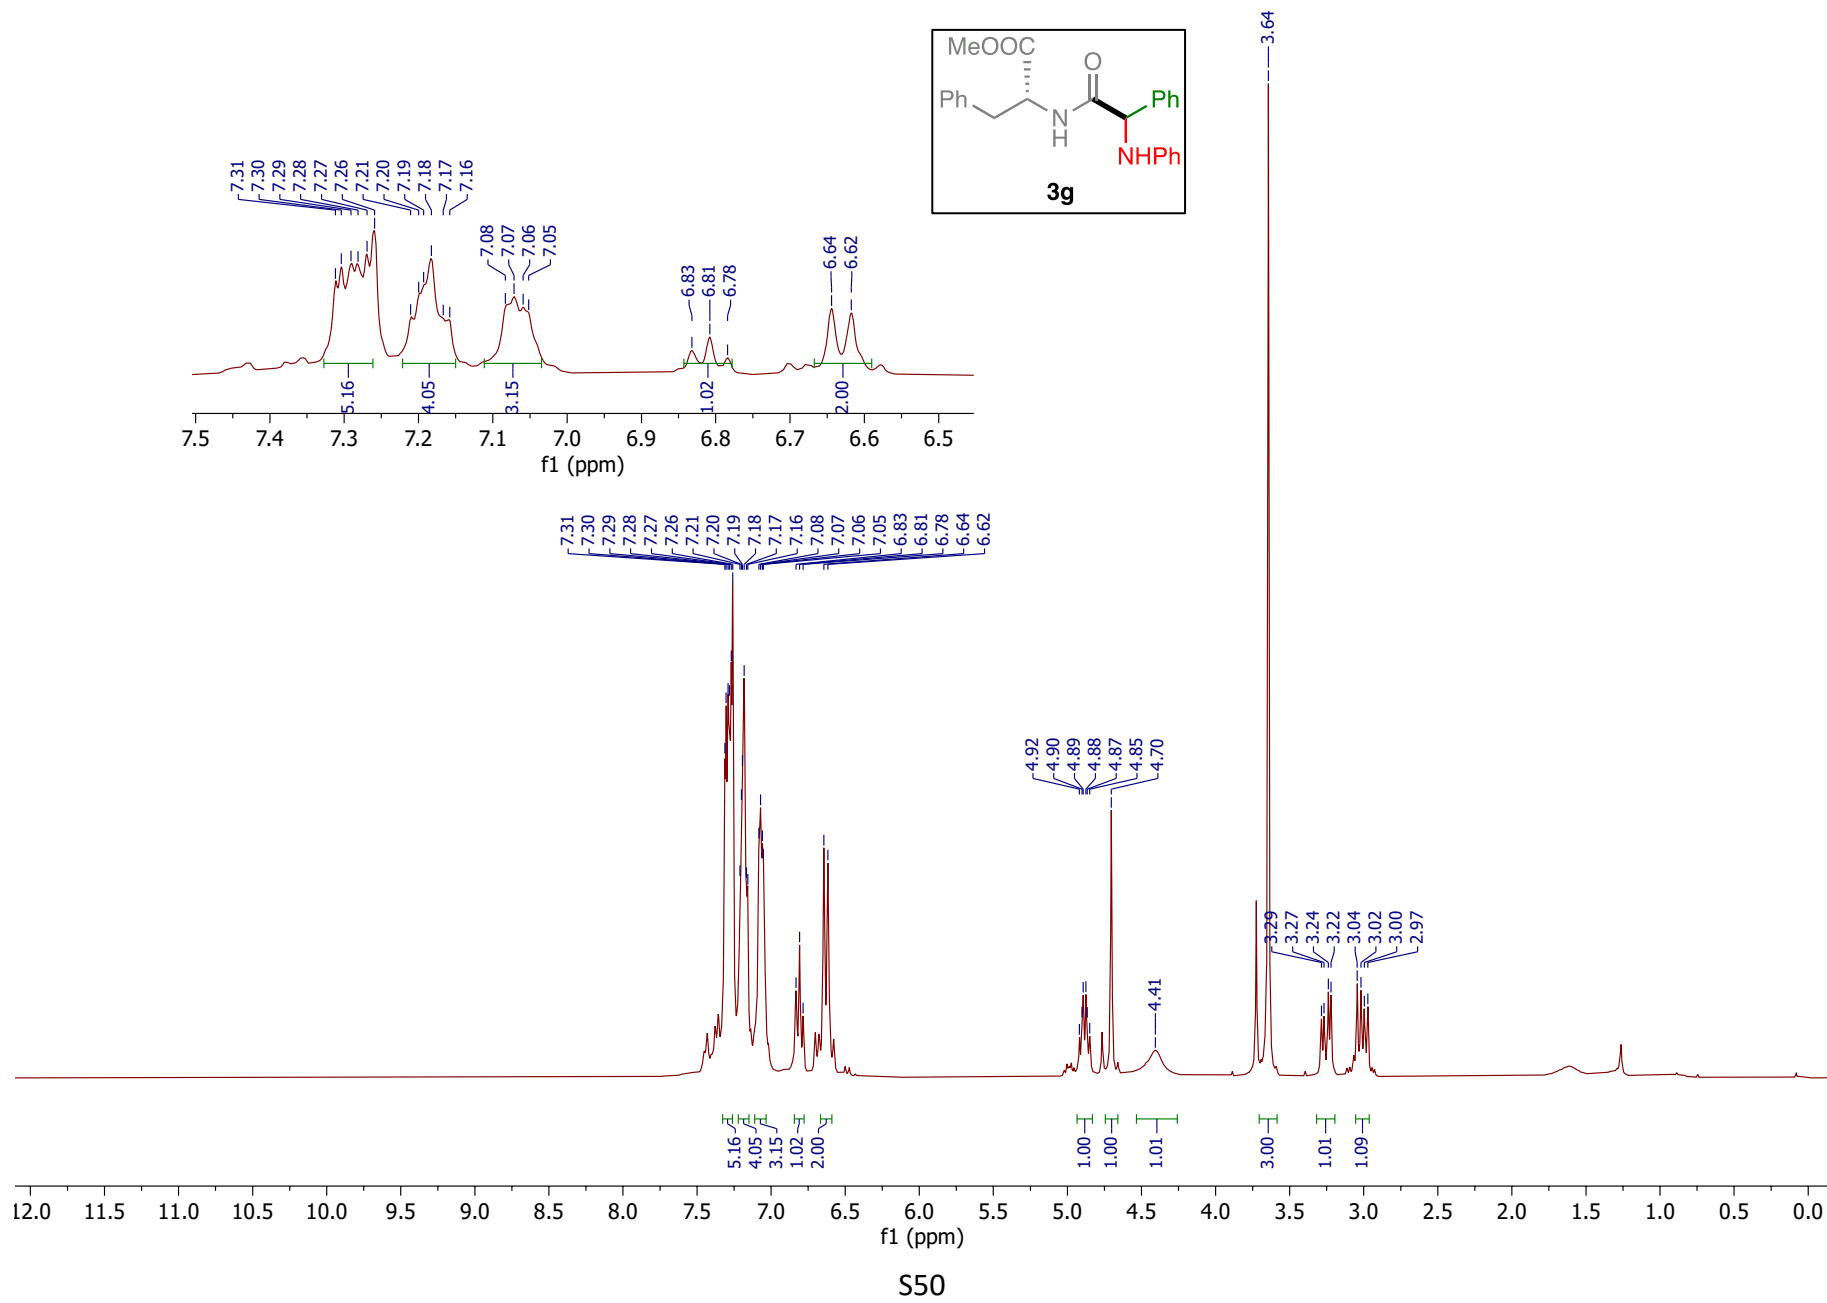

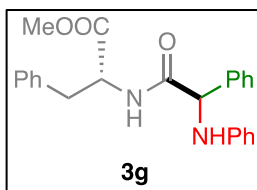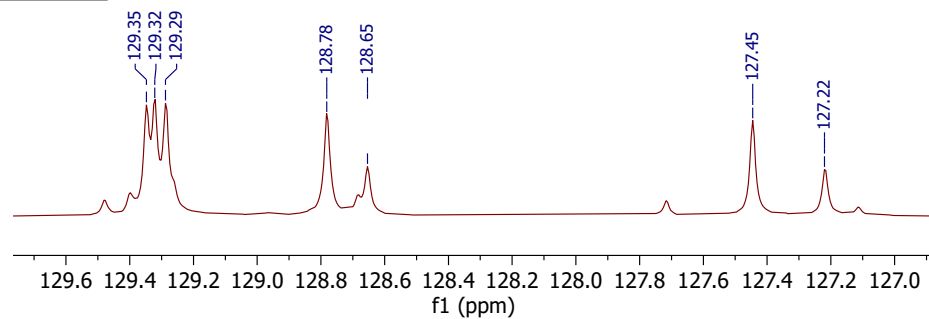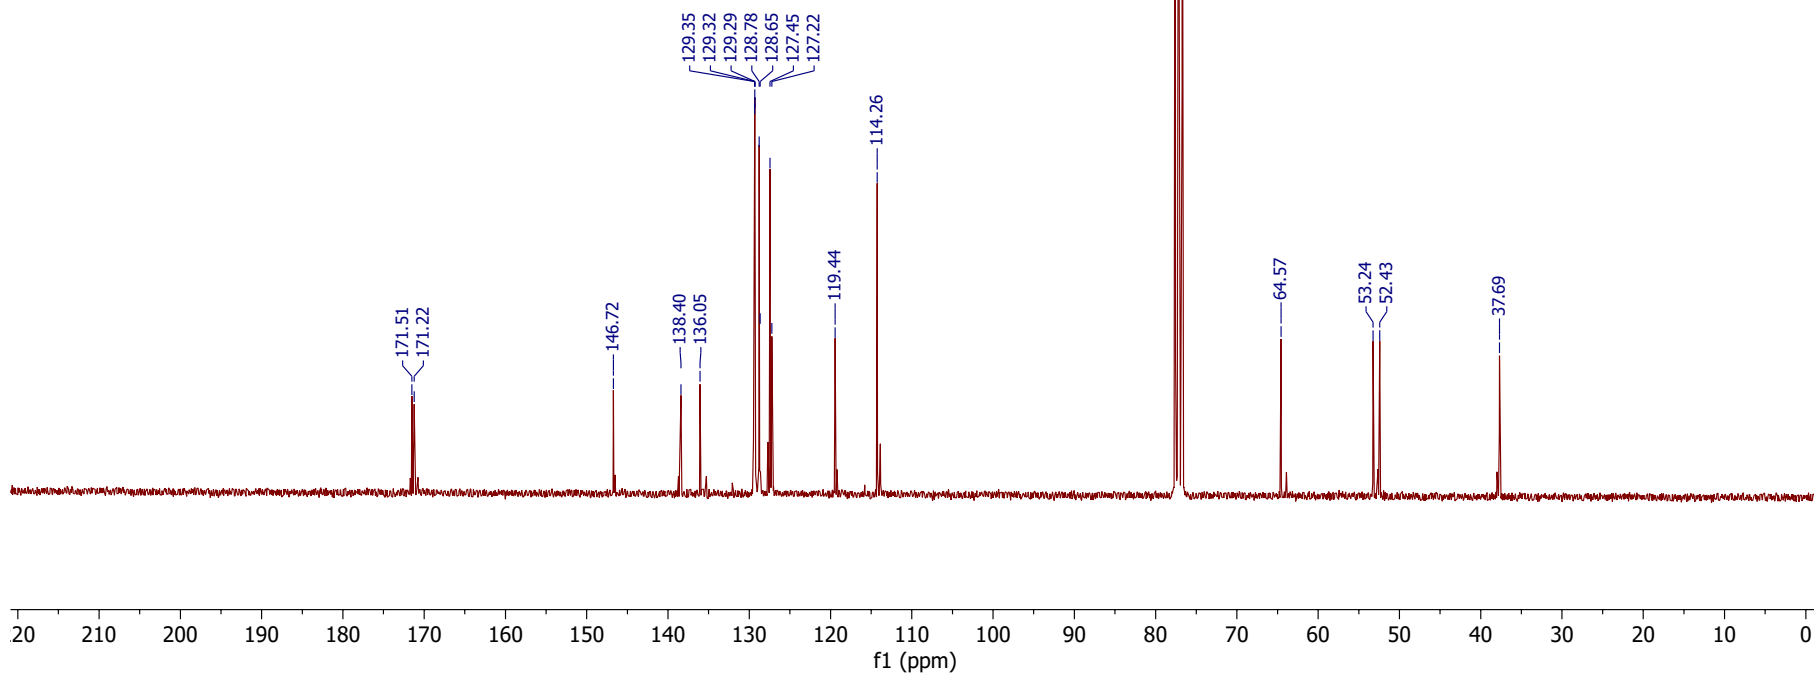

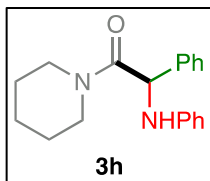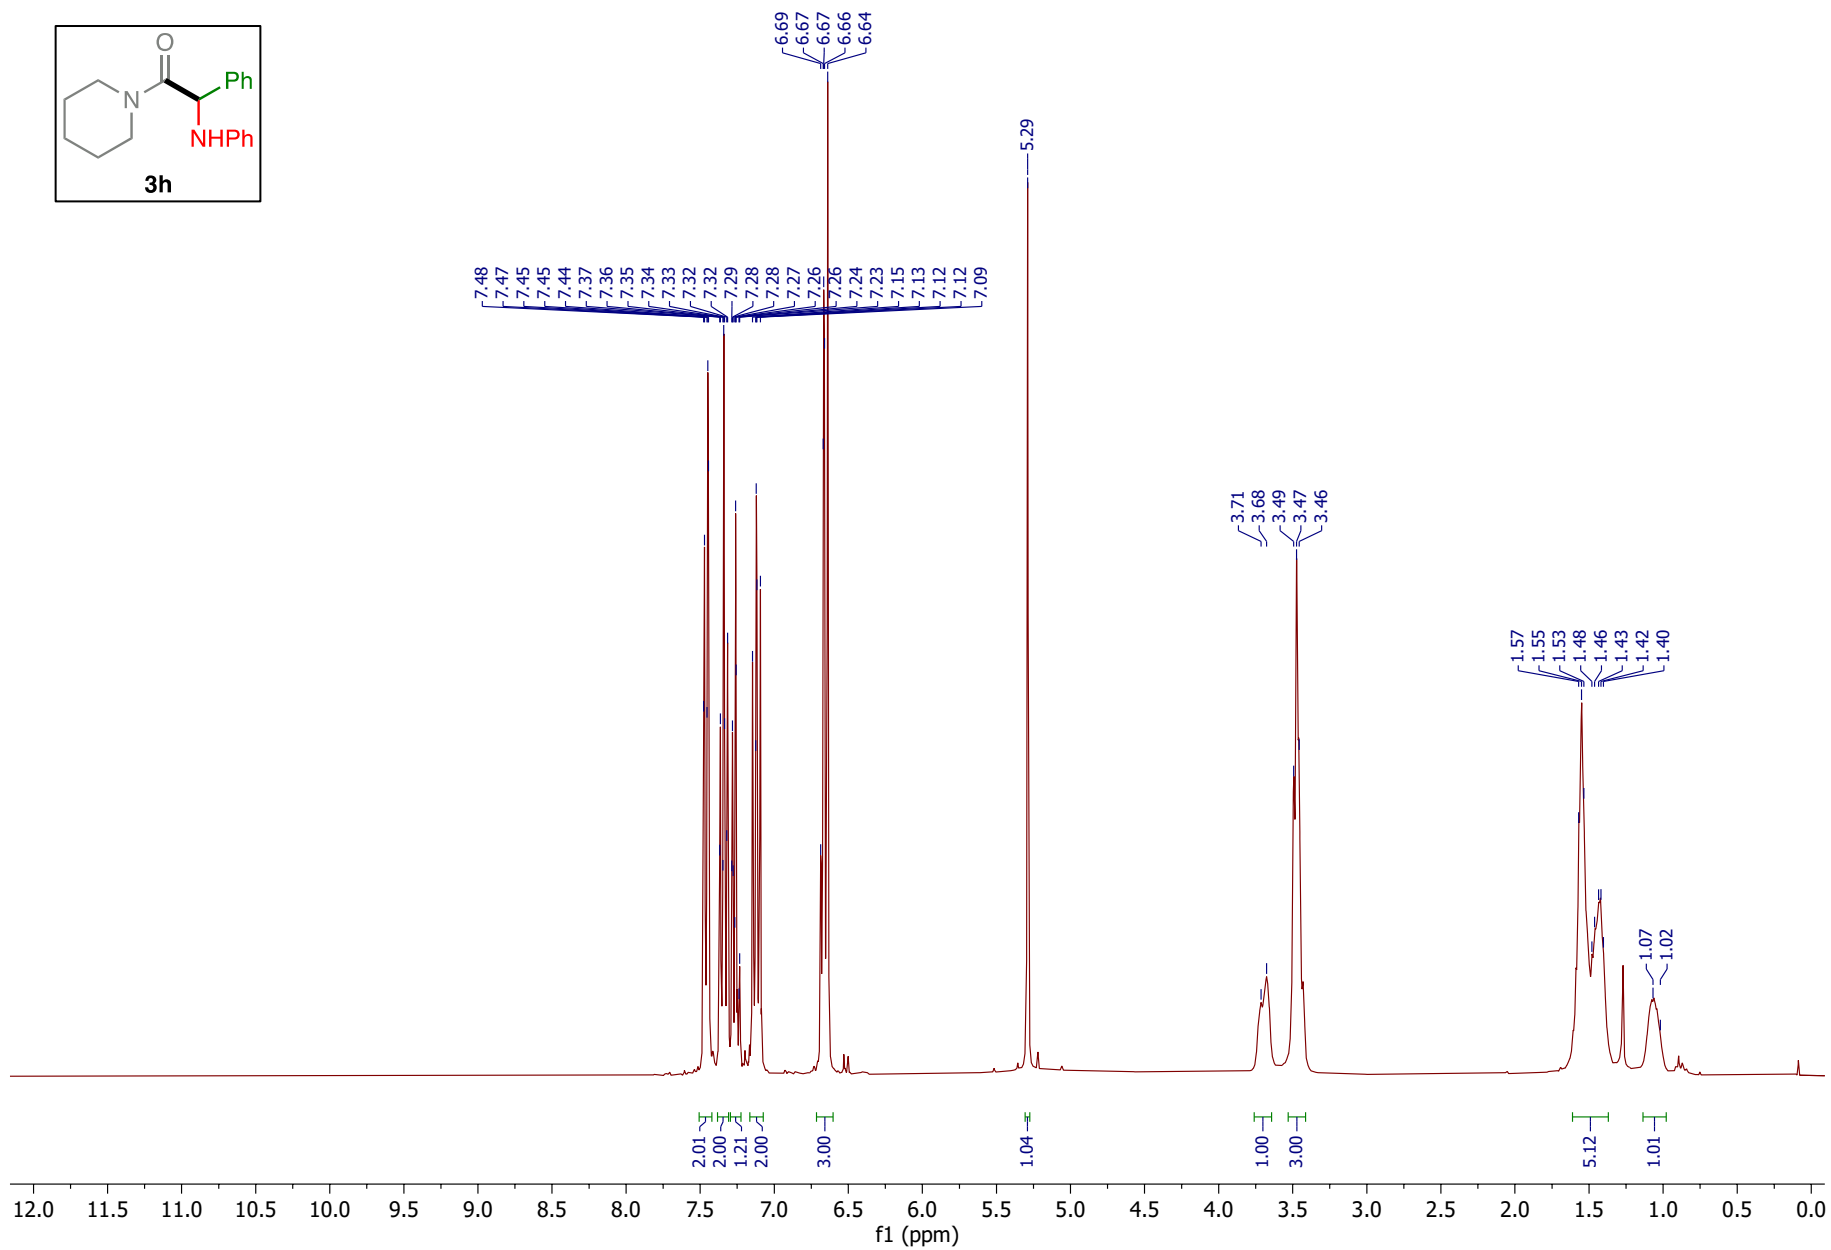

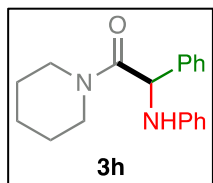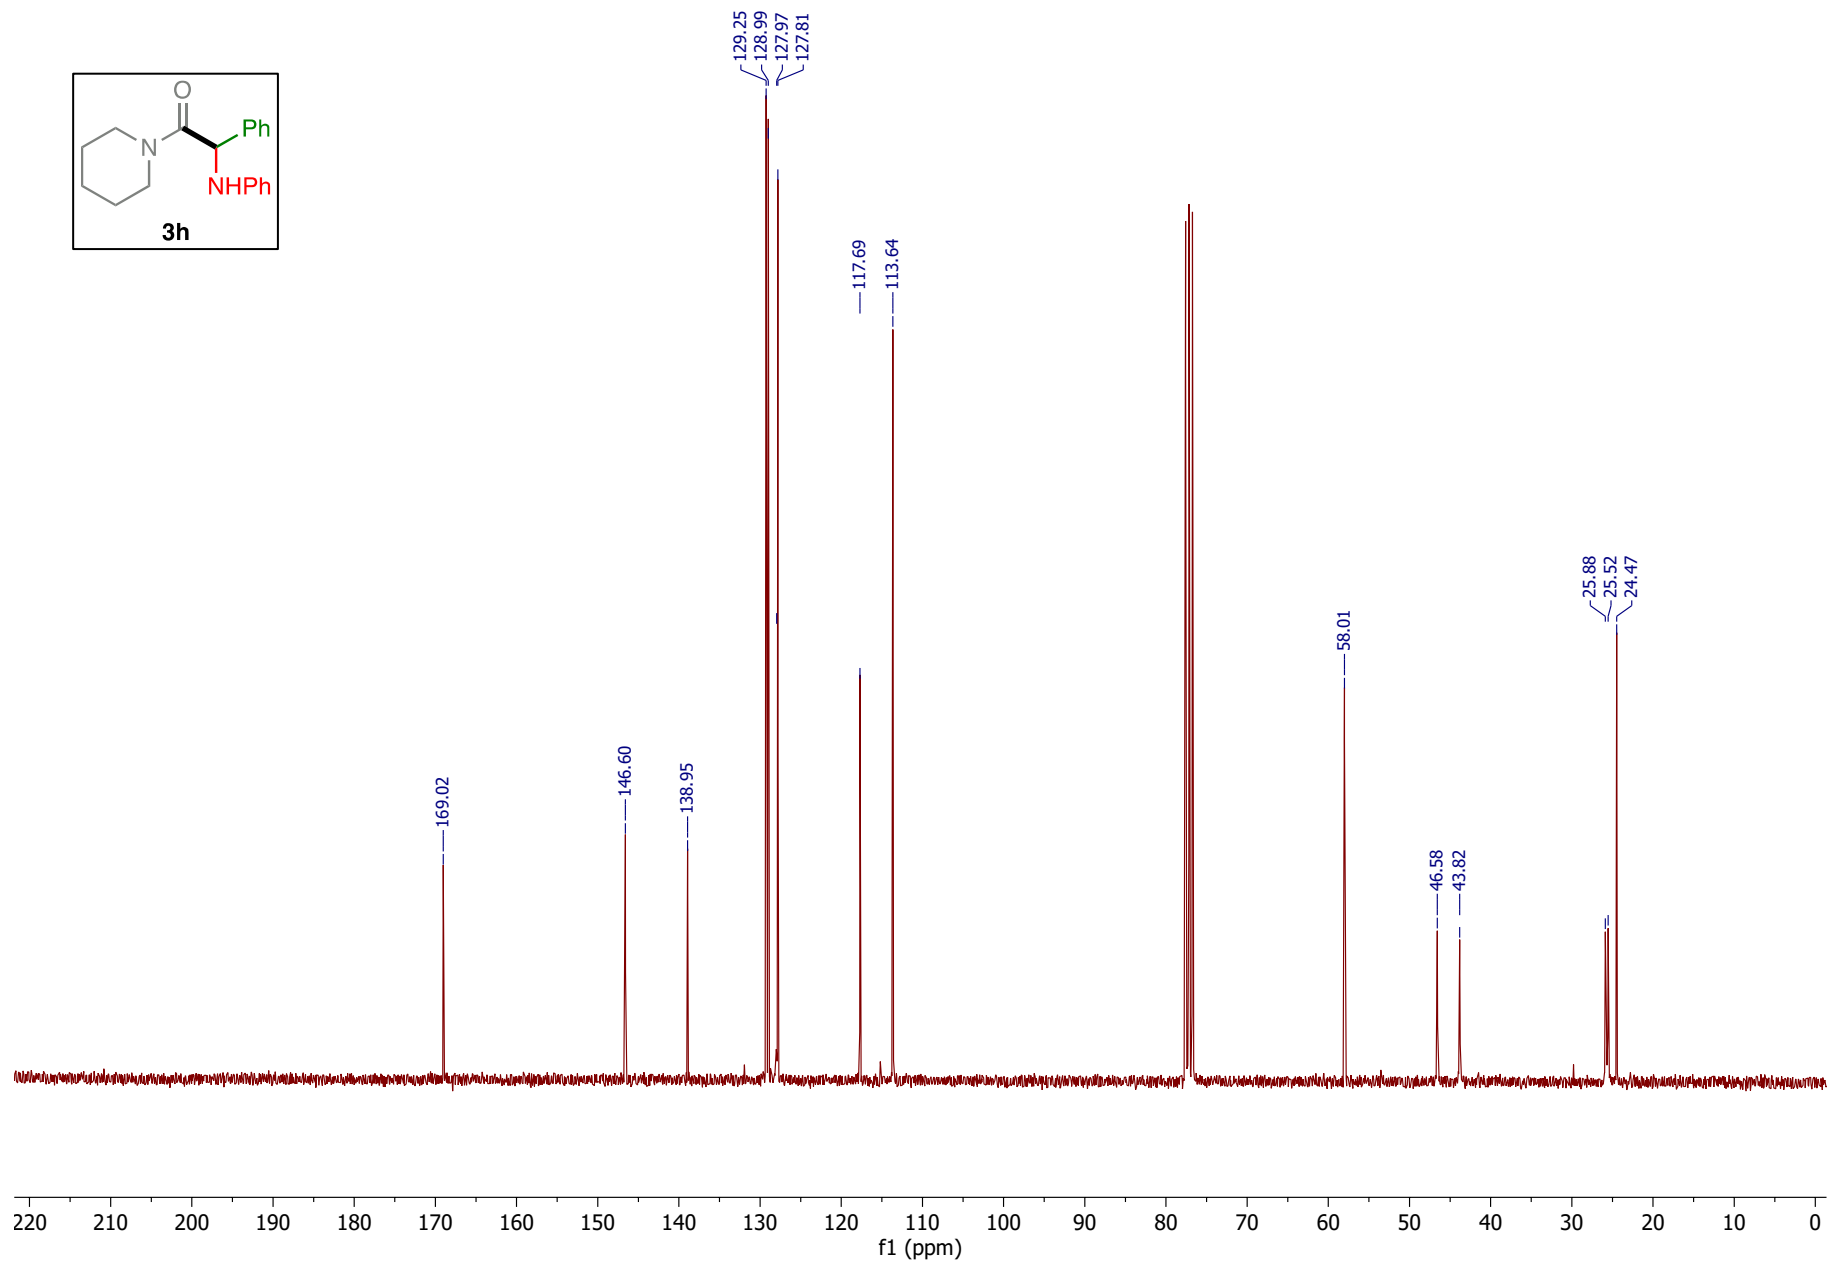

S53

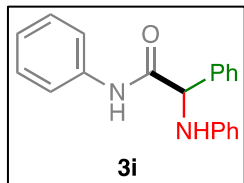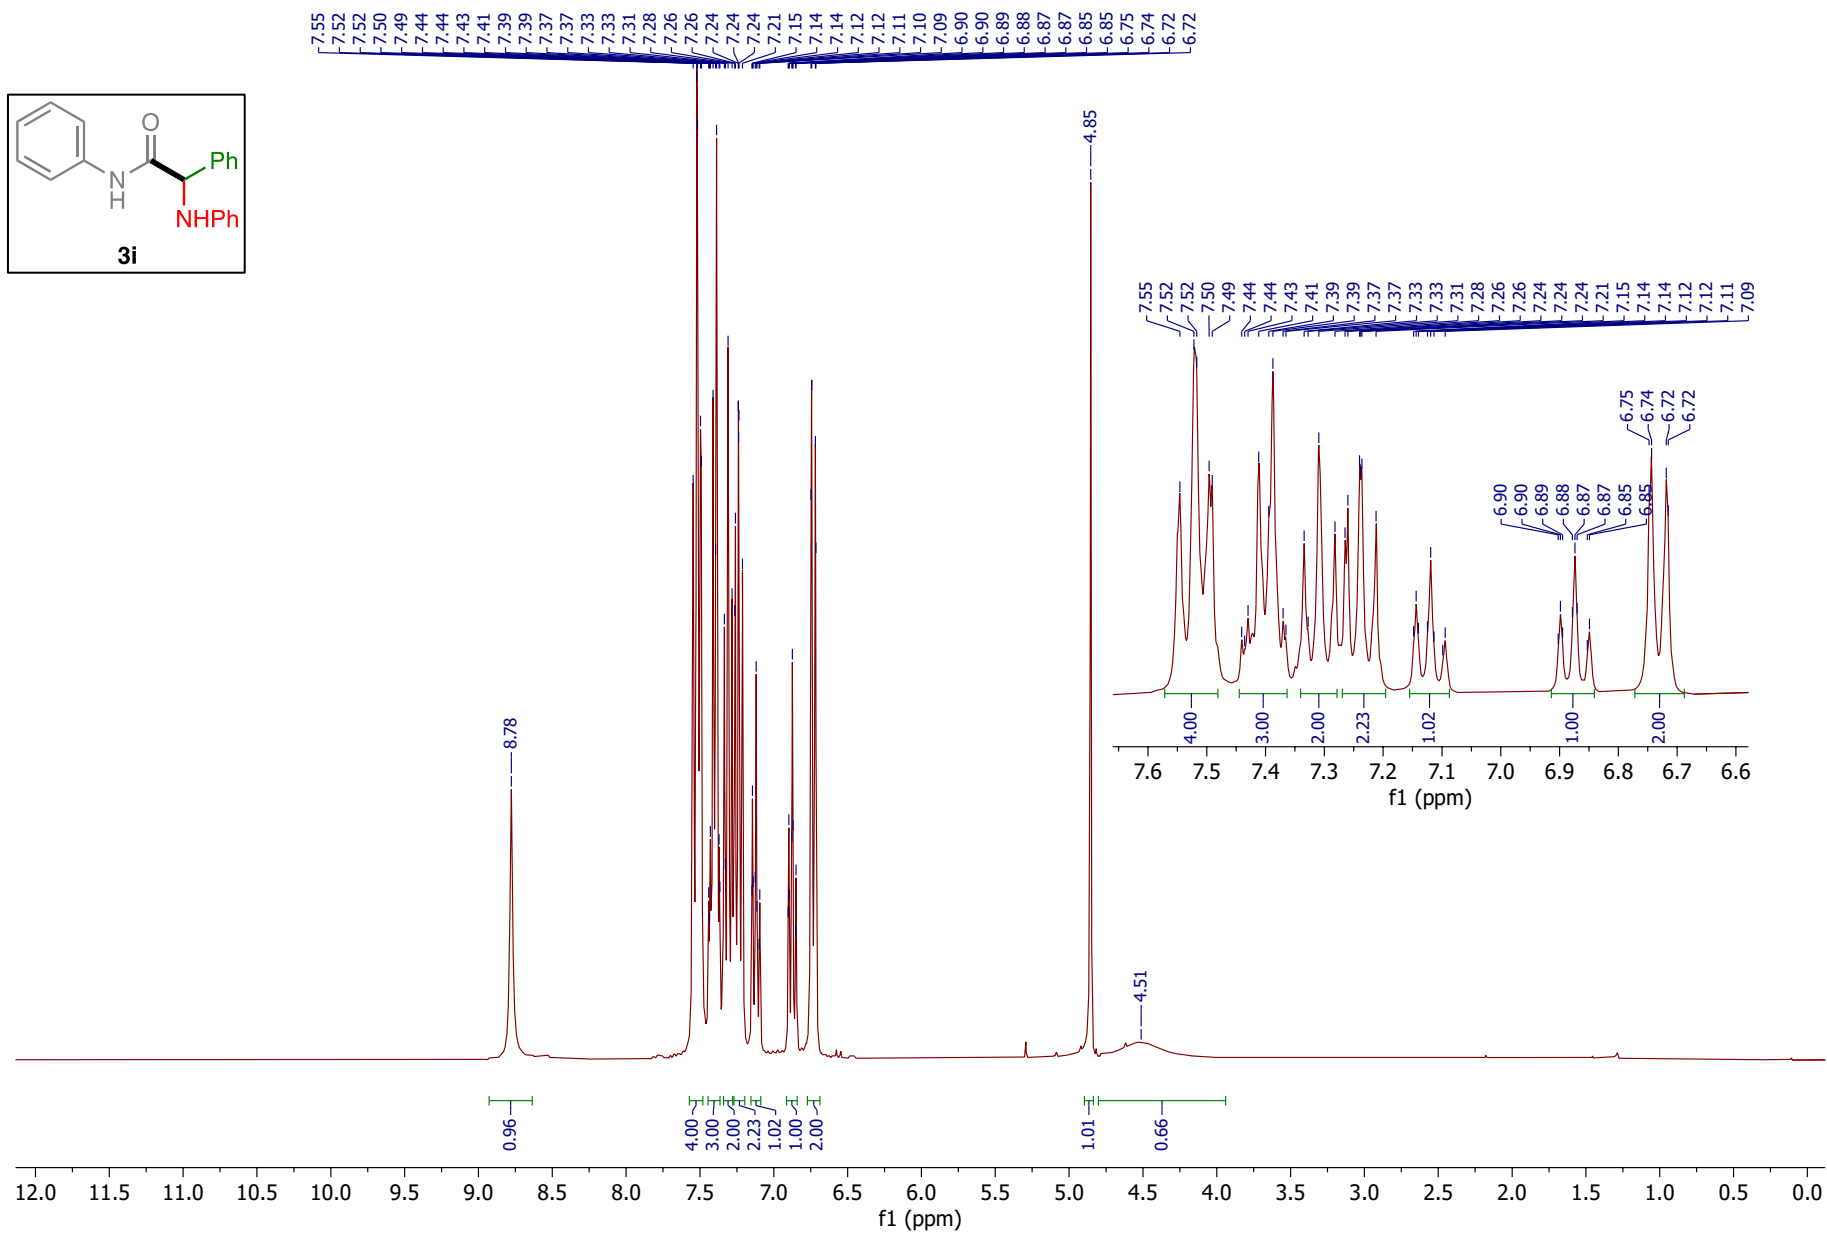

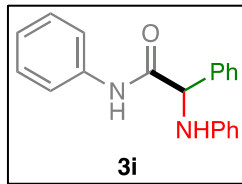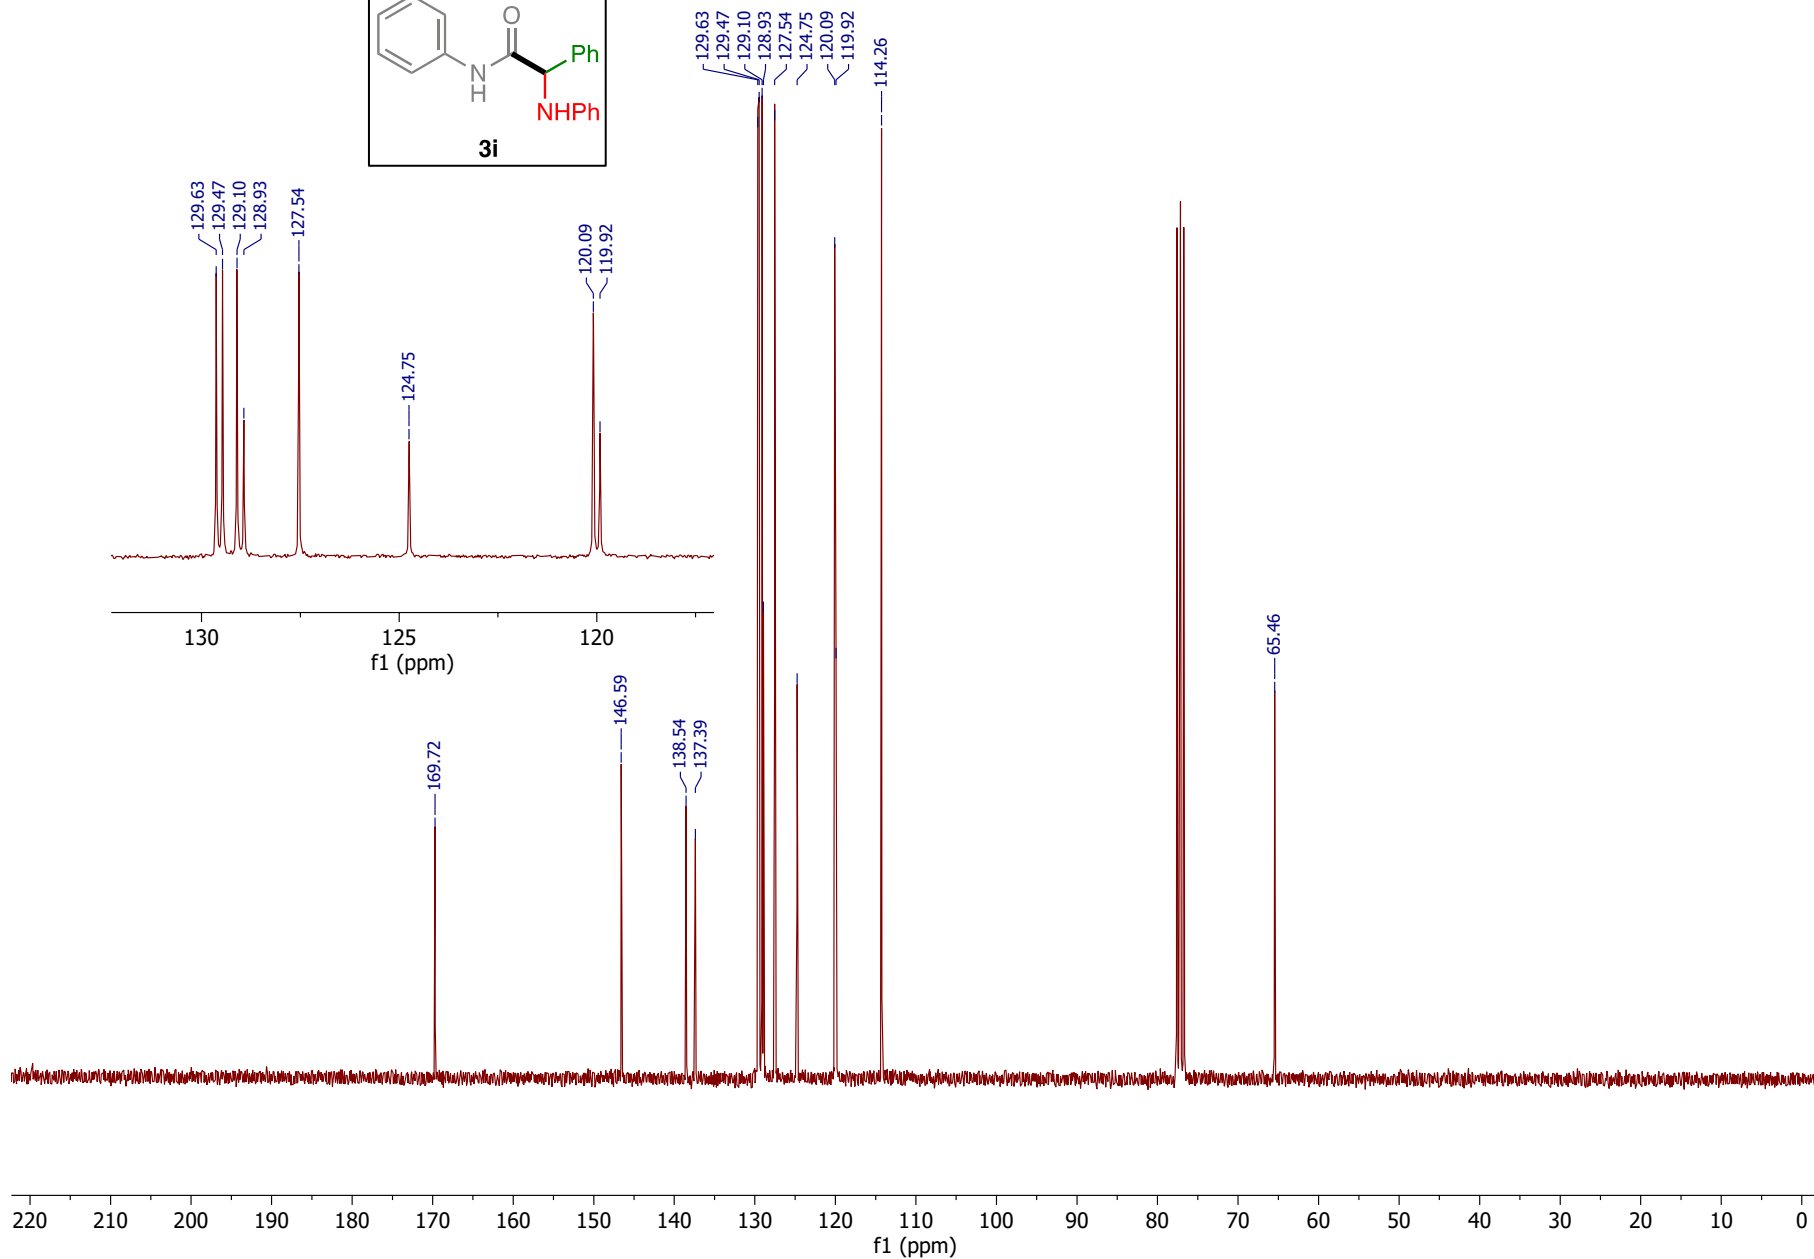



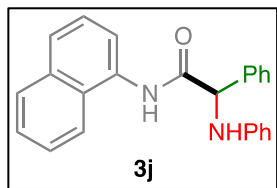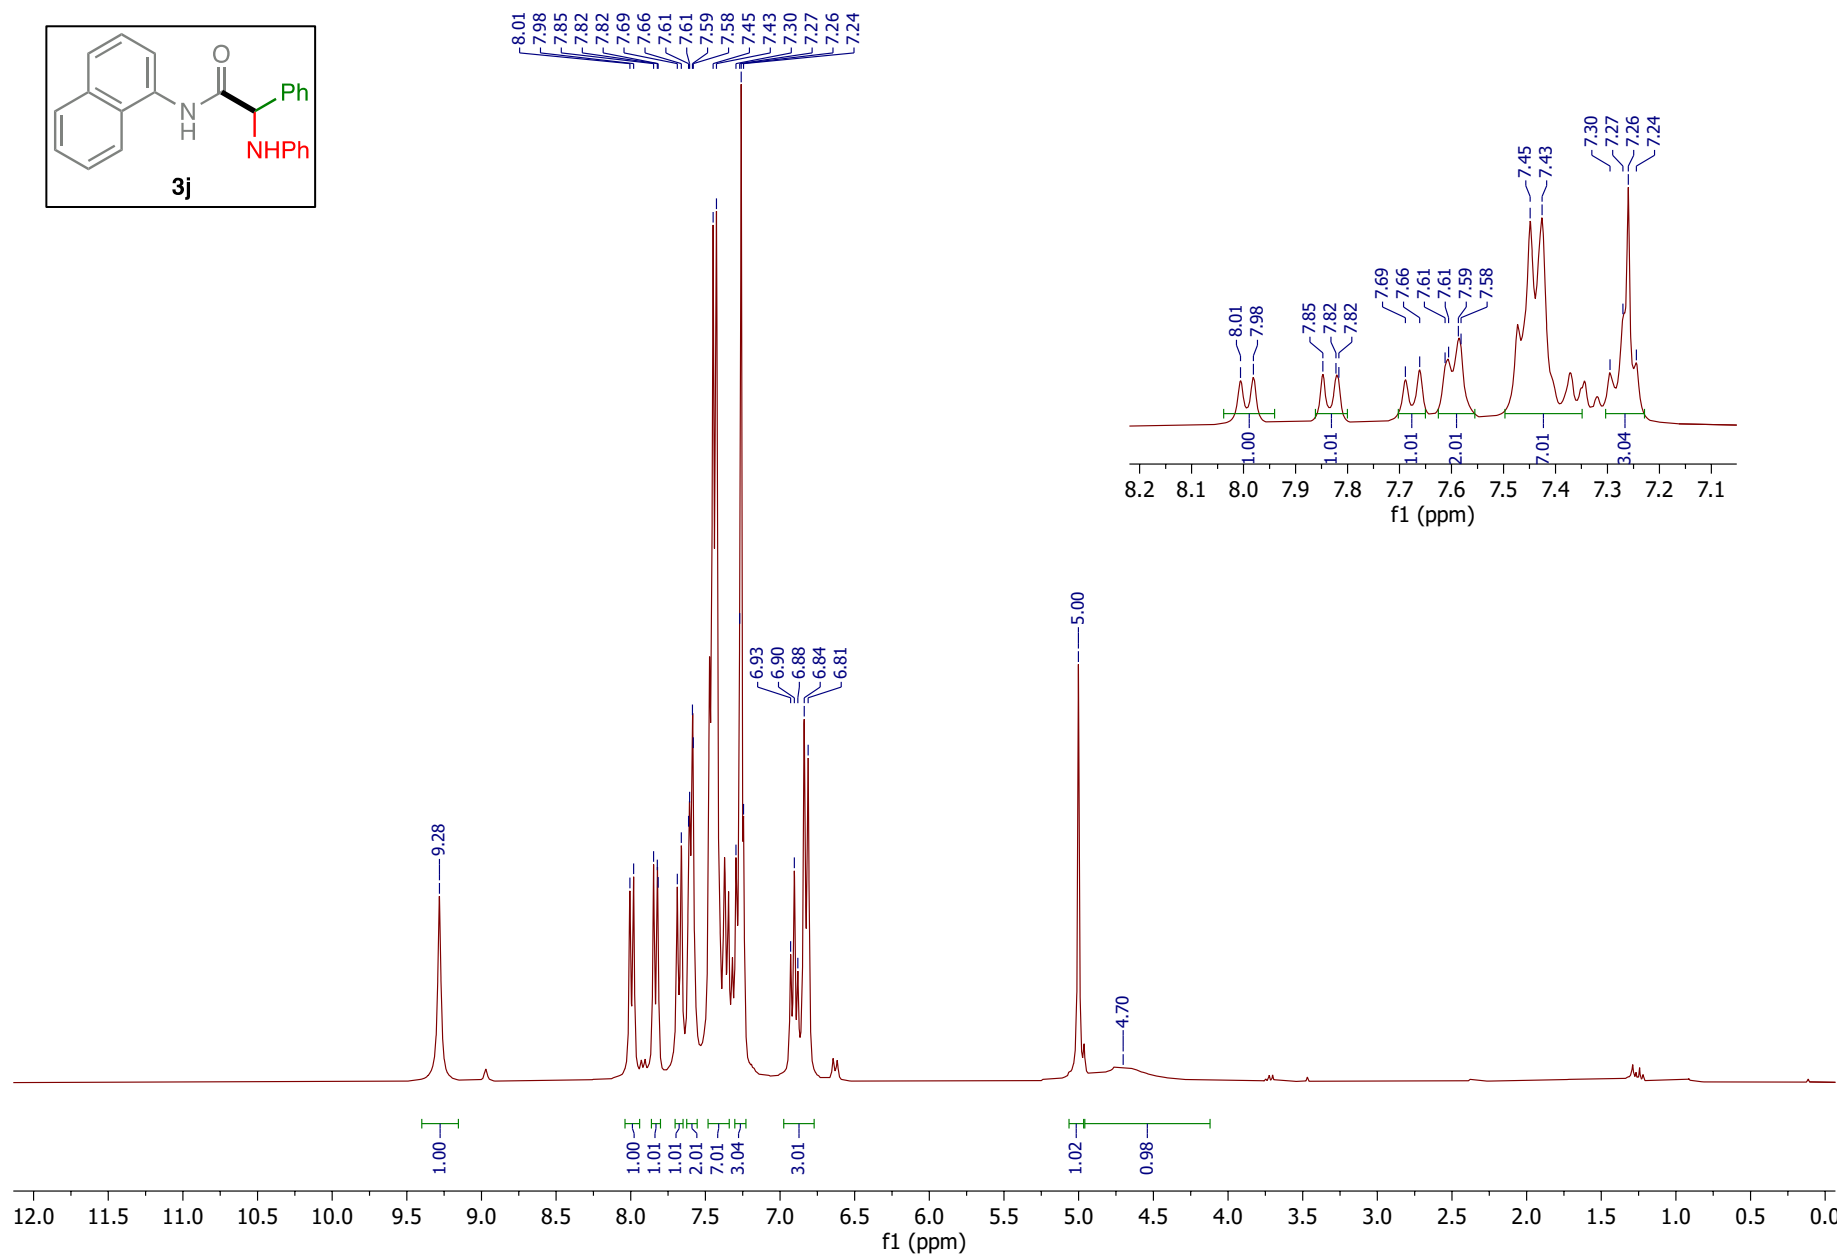

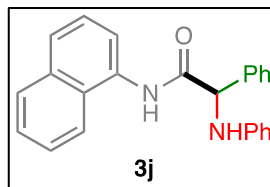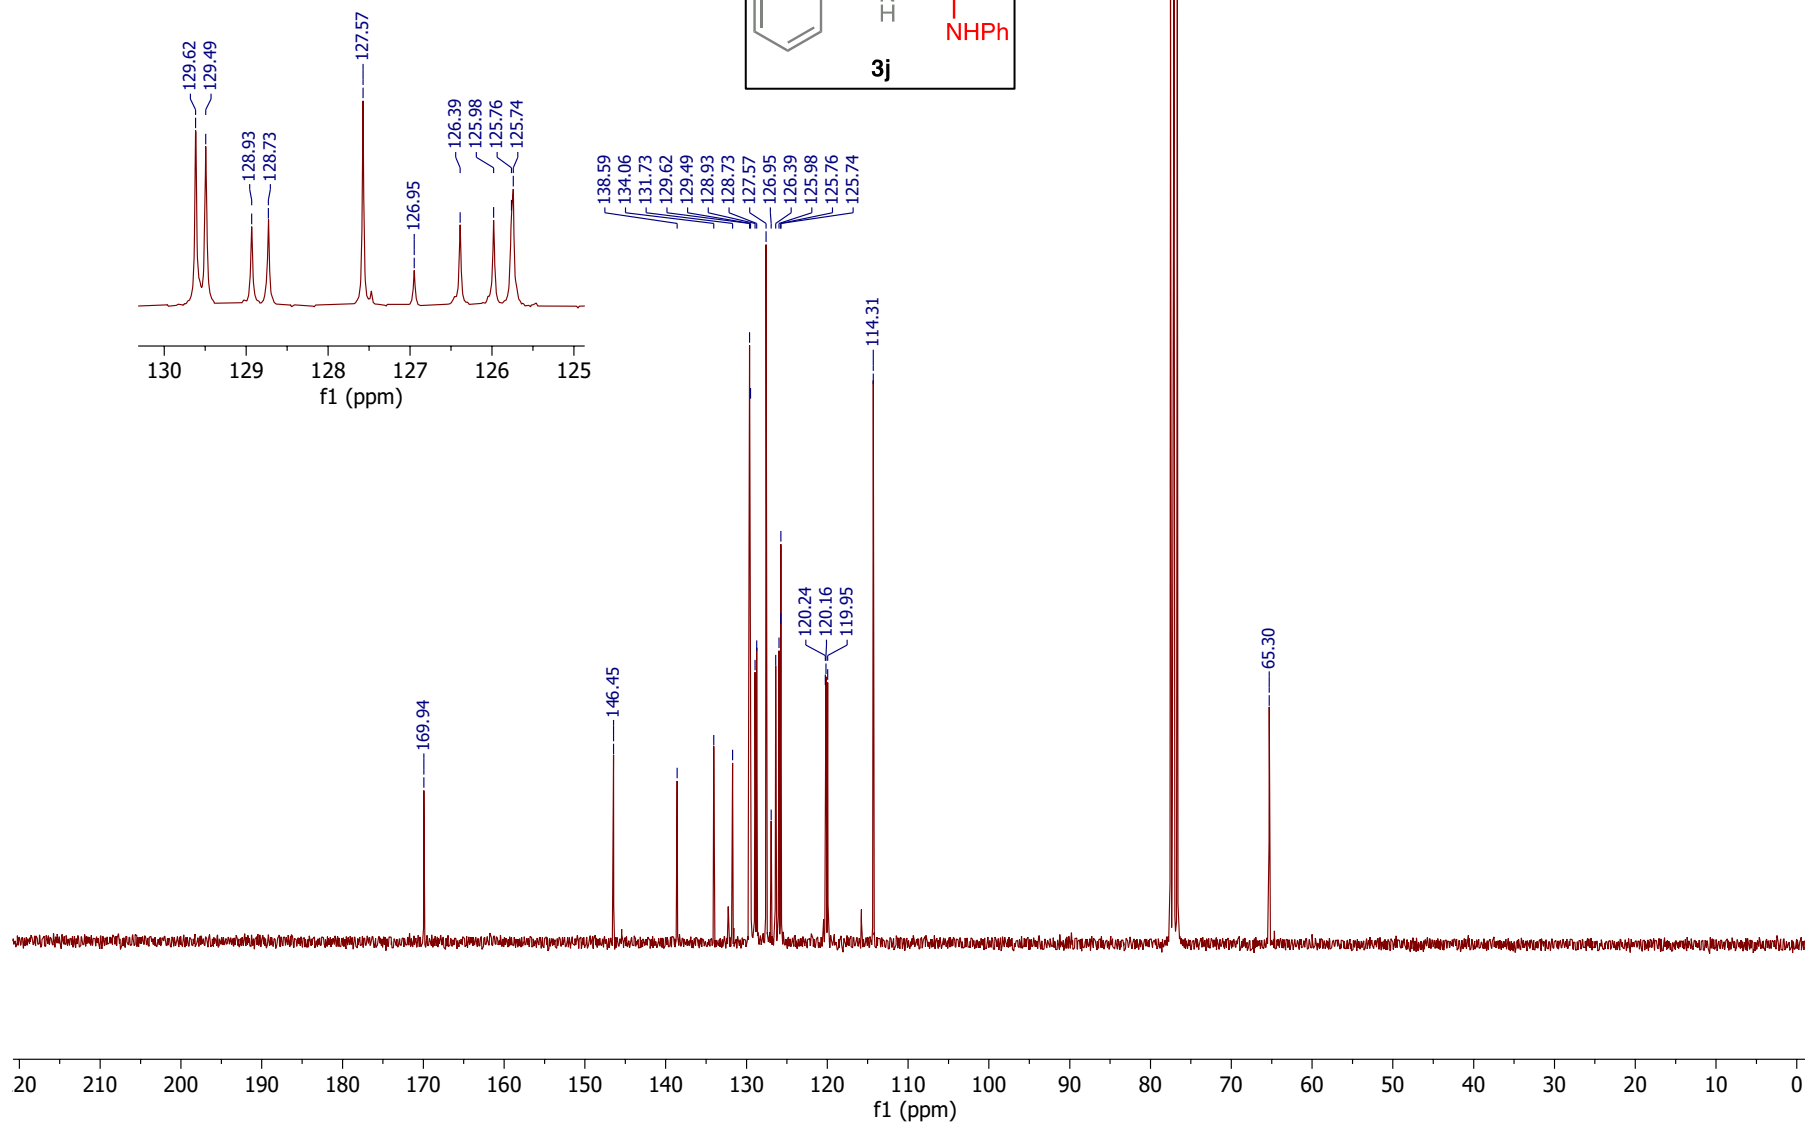

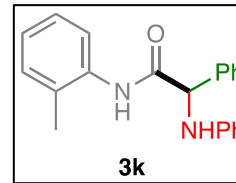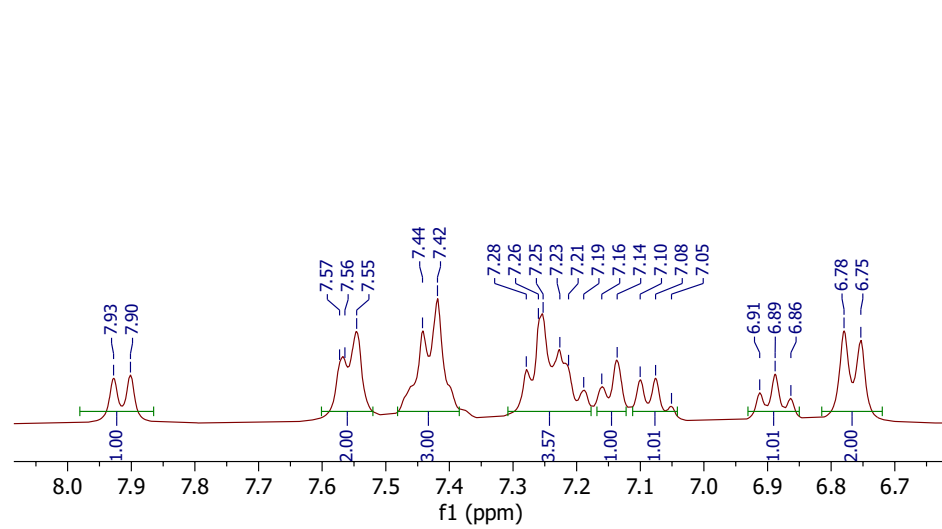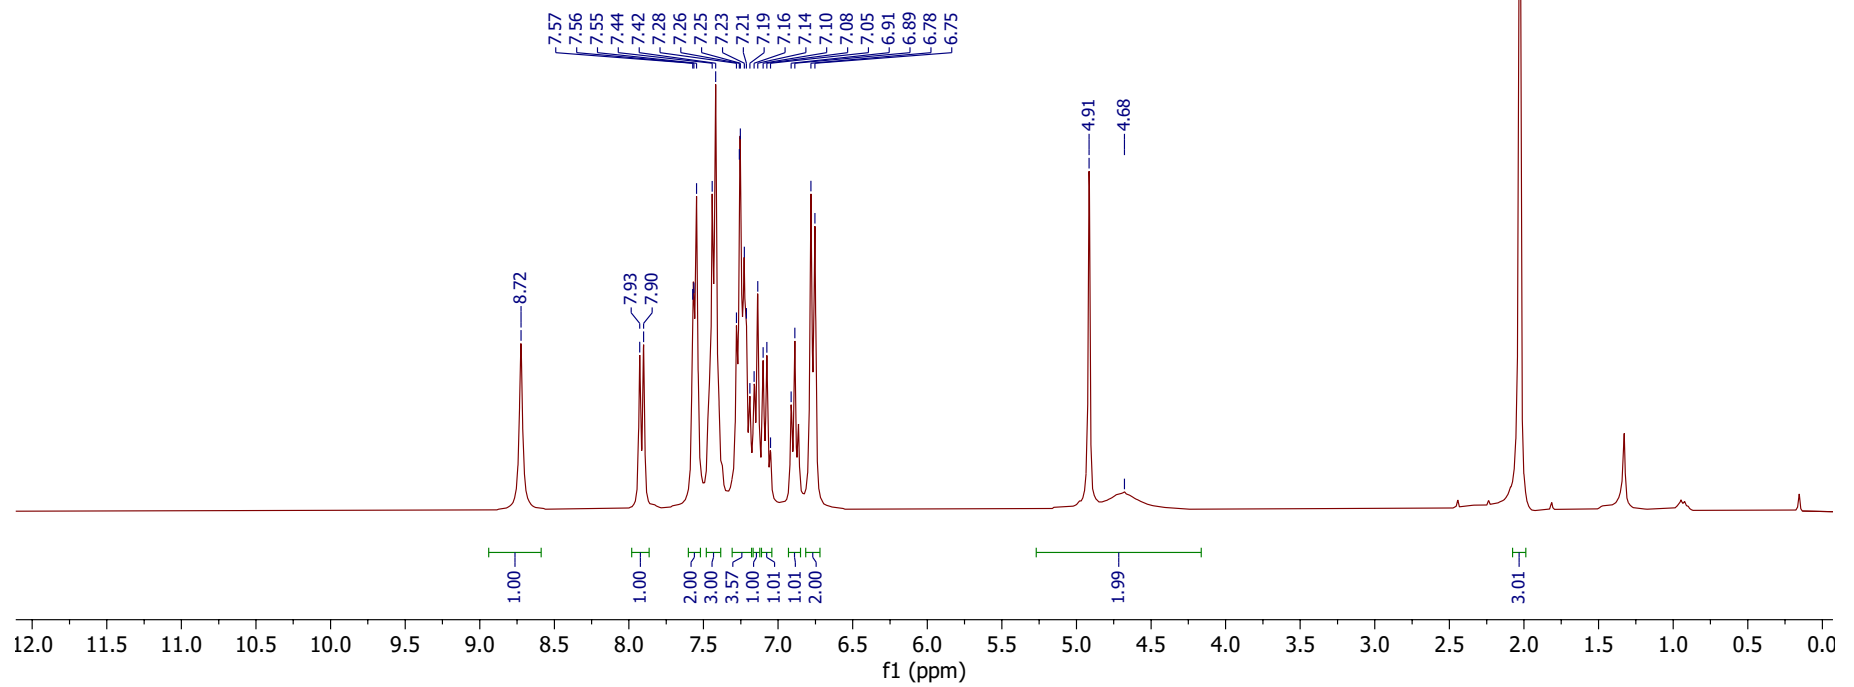

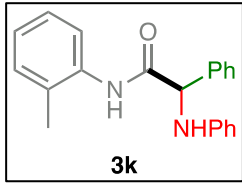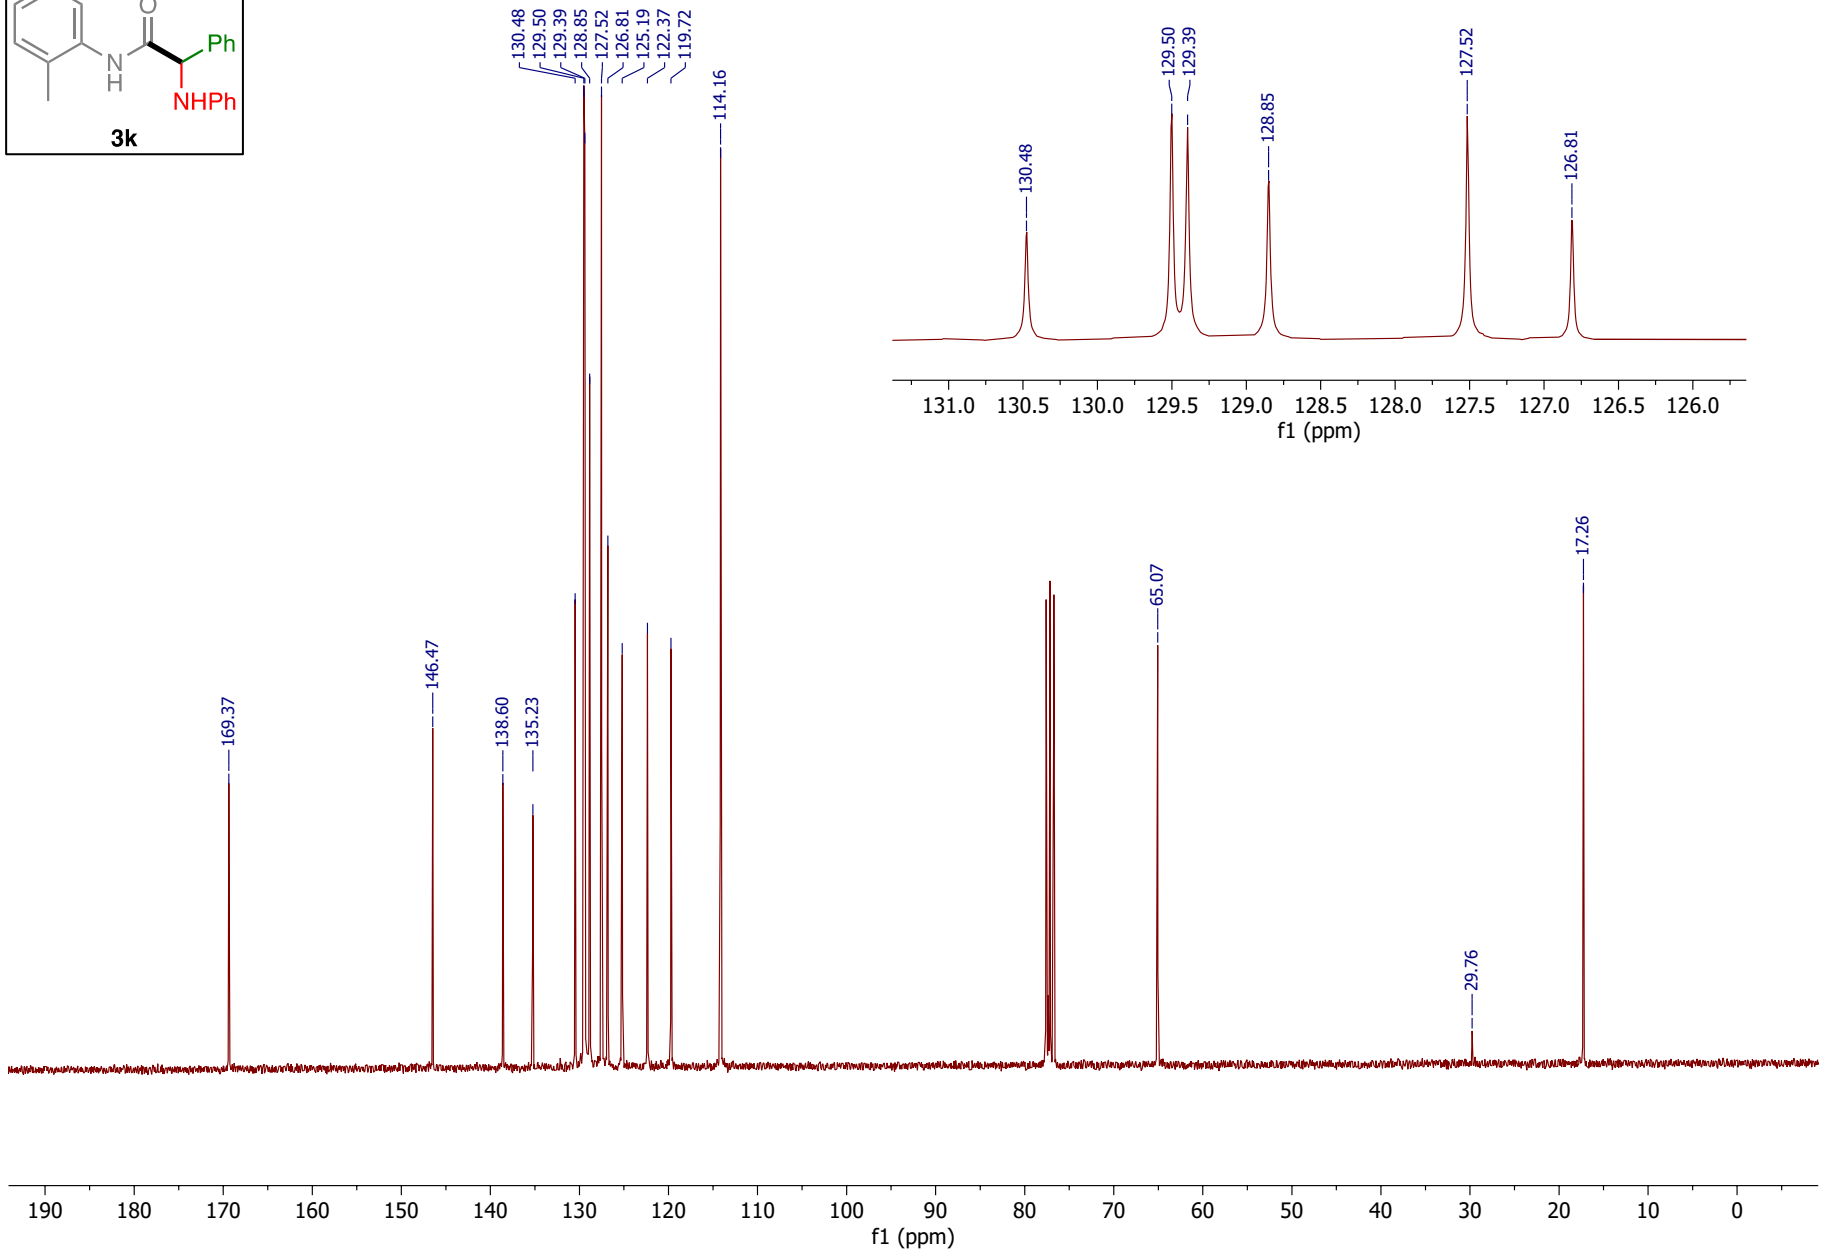

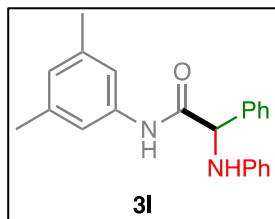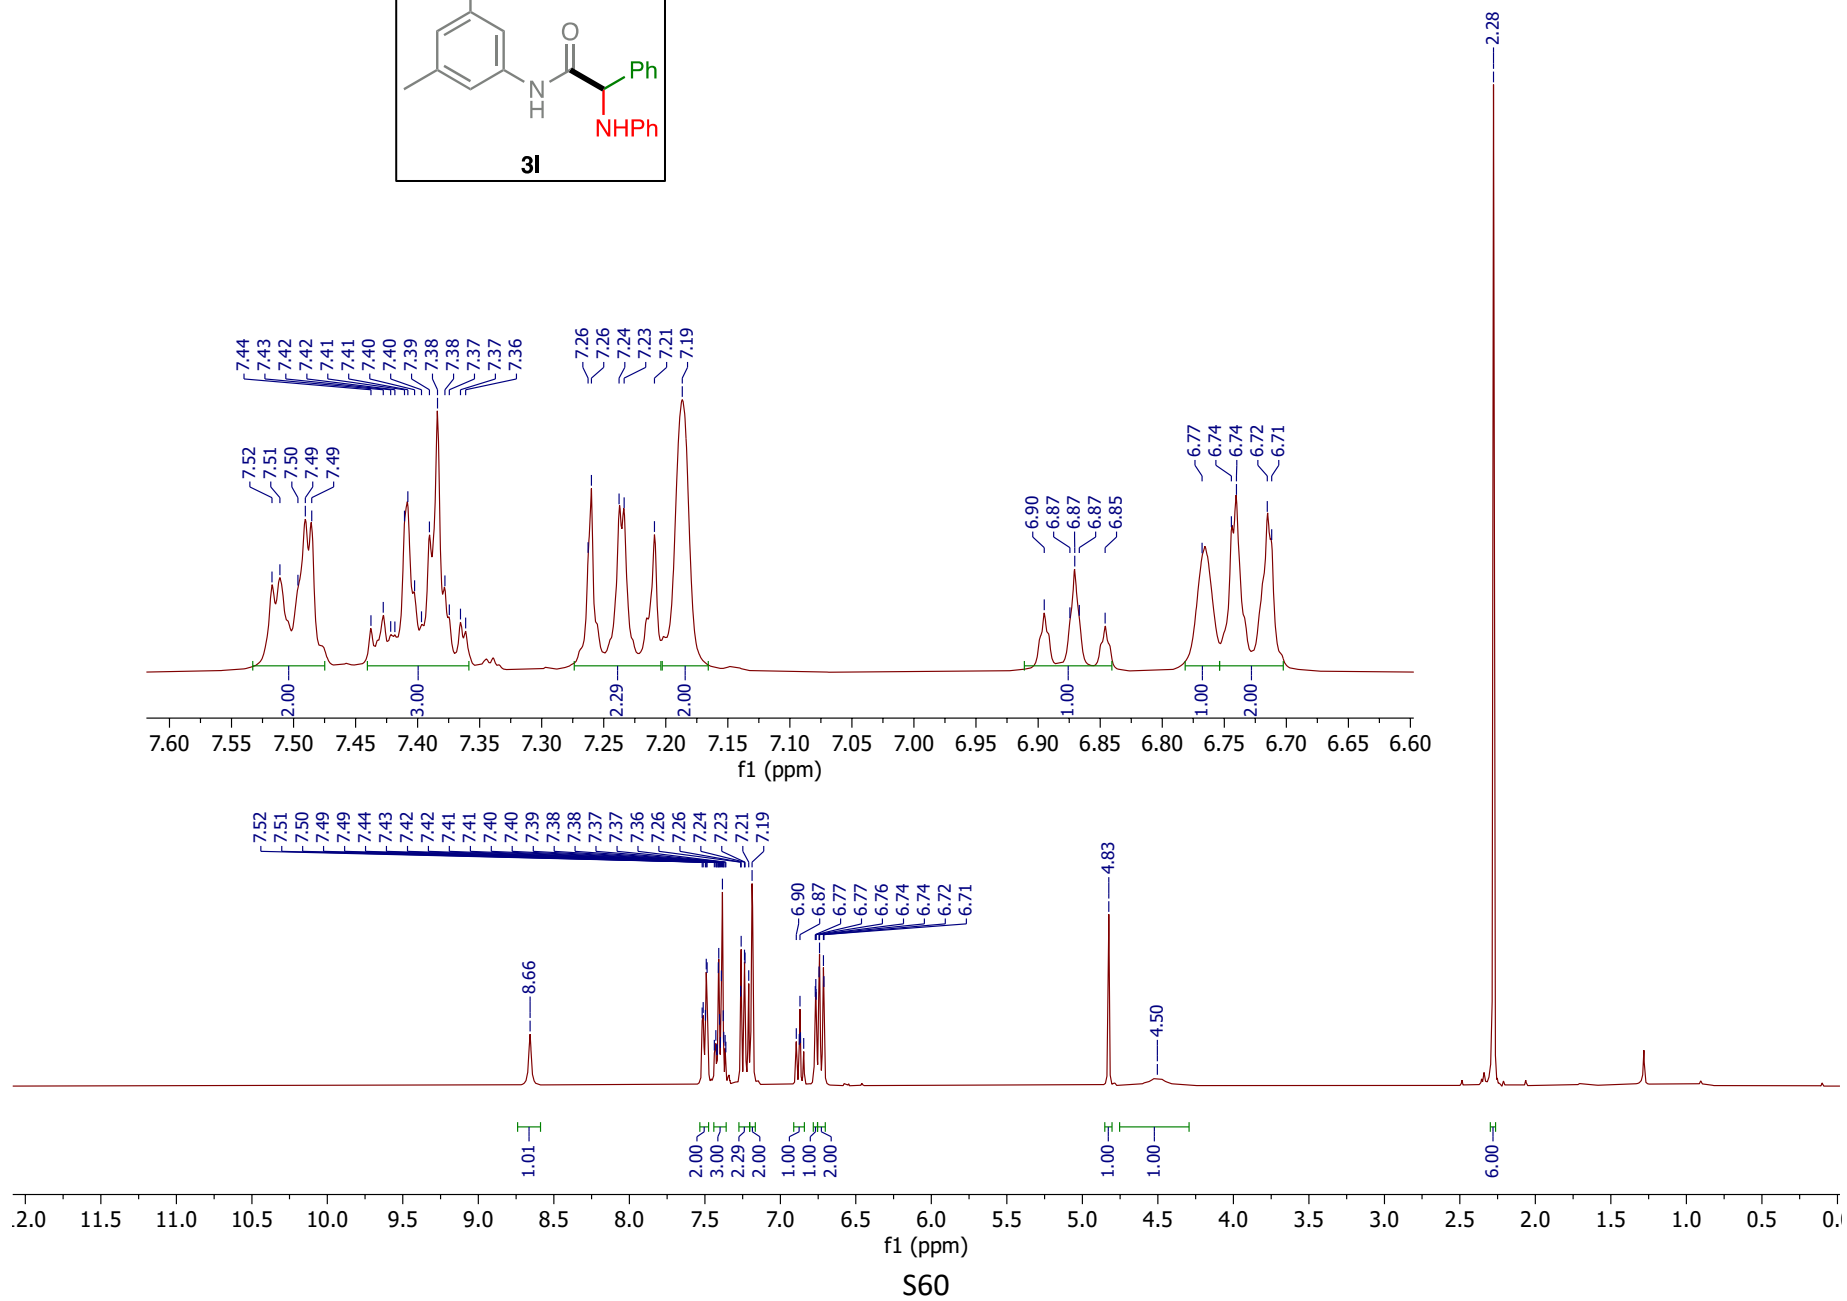

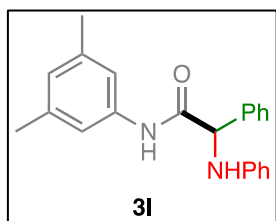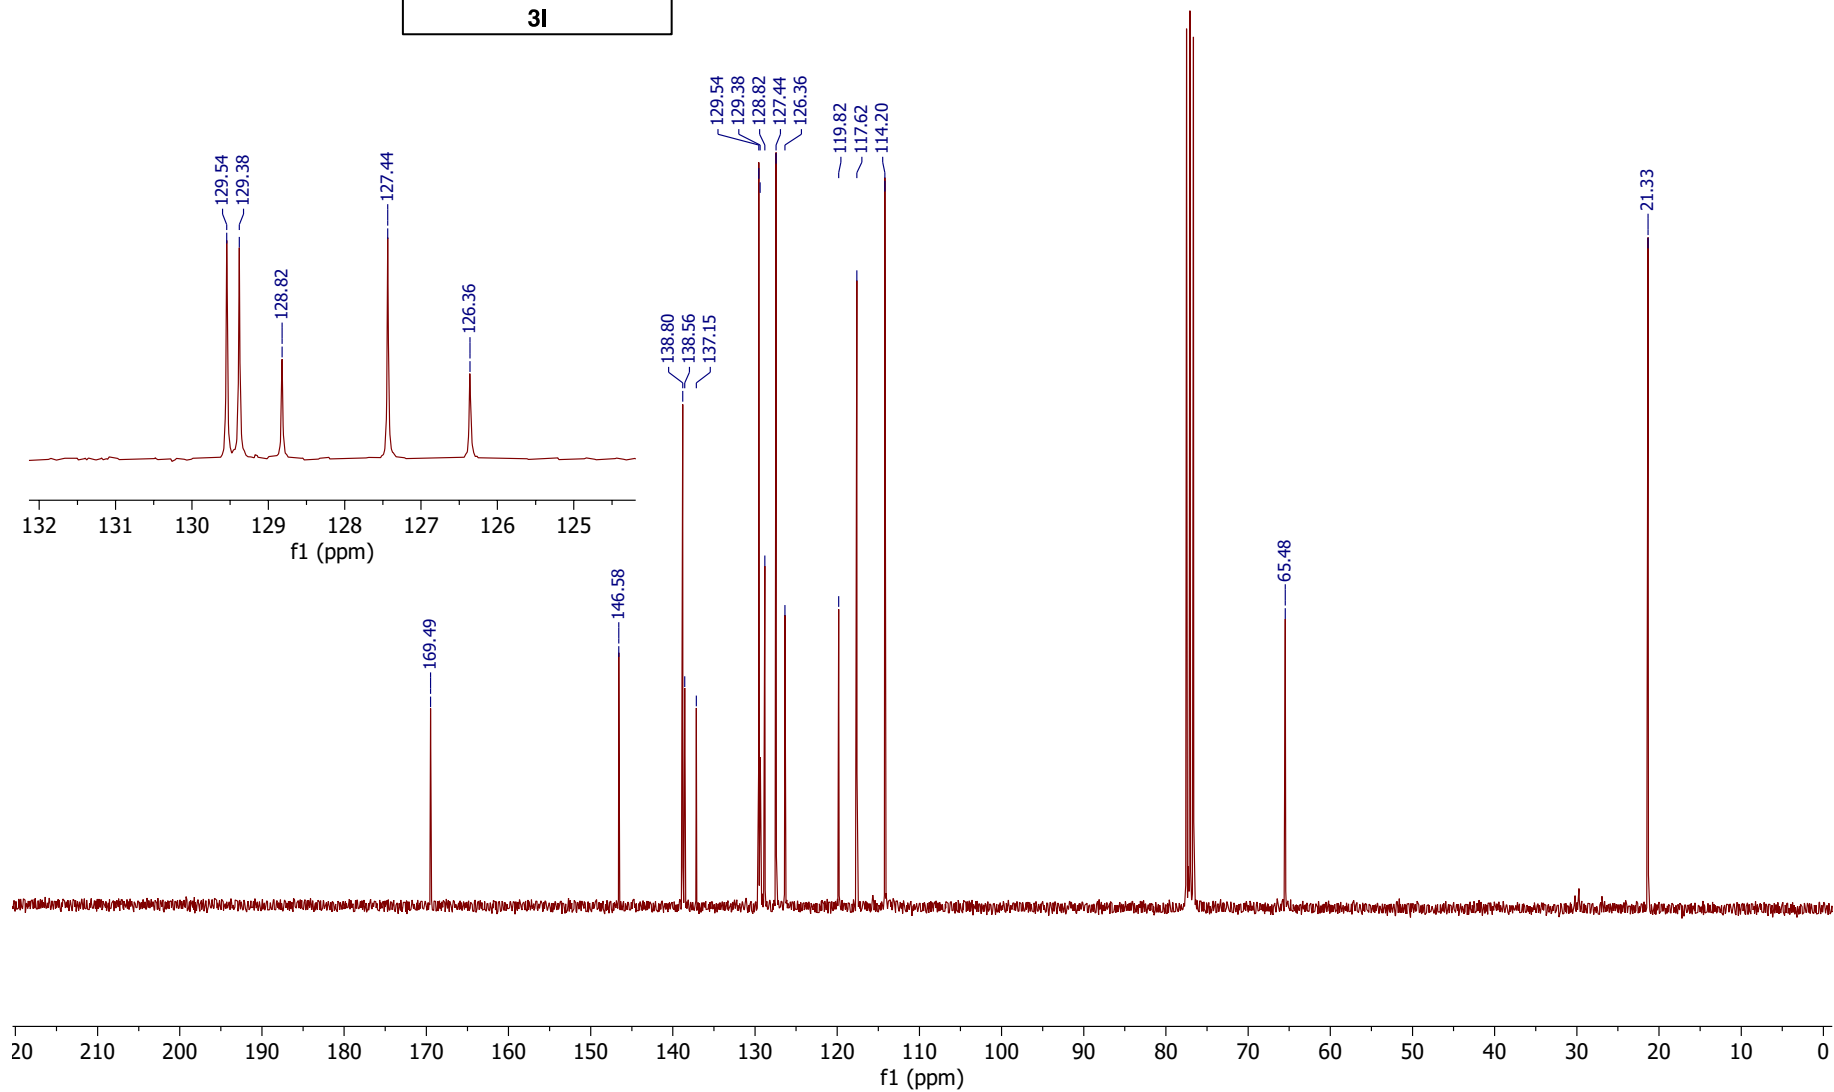

S61

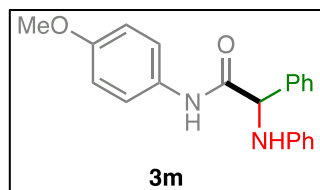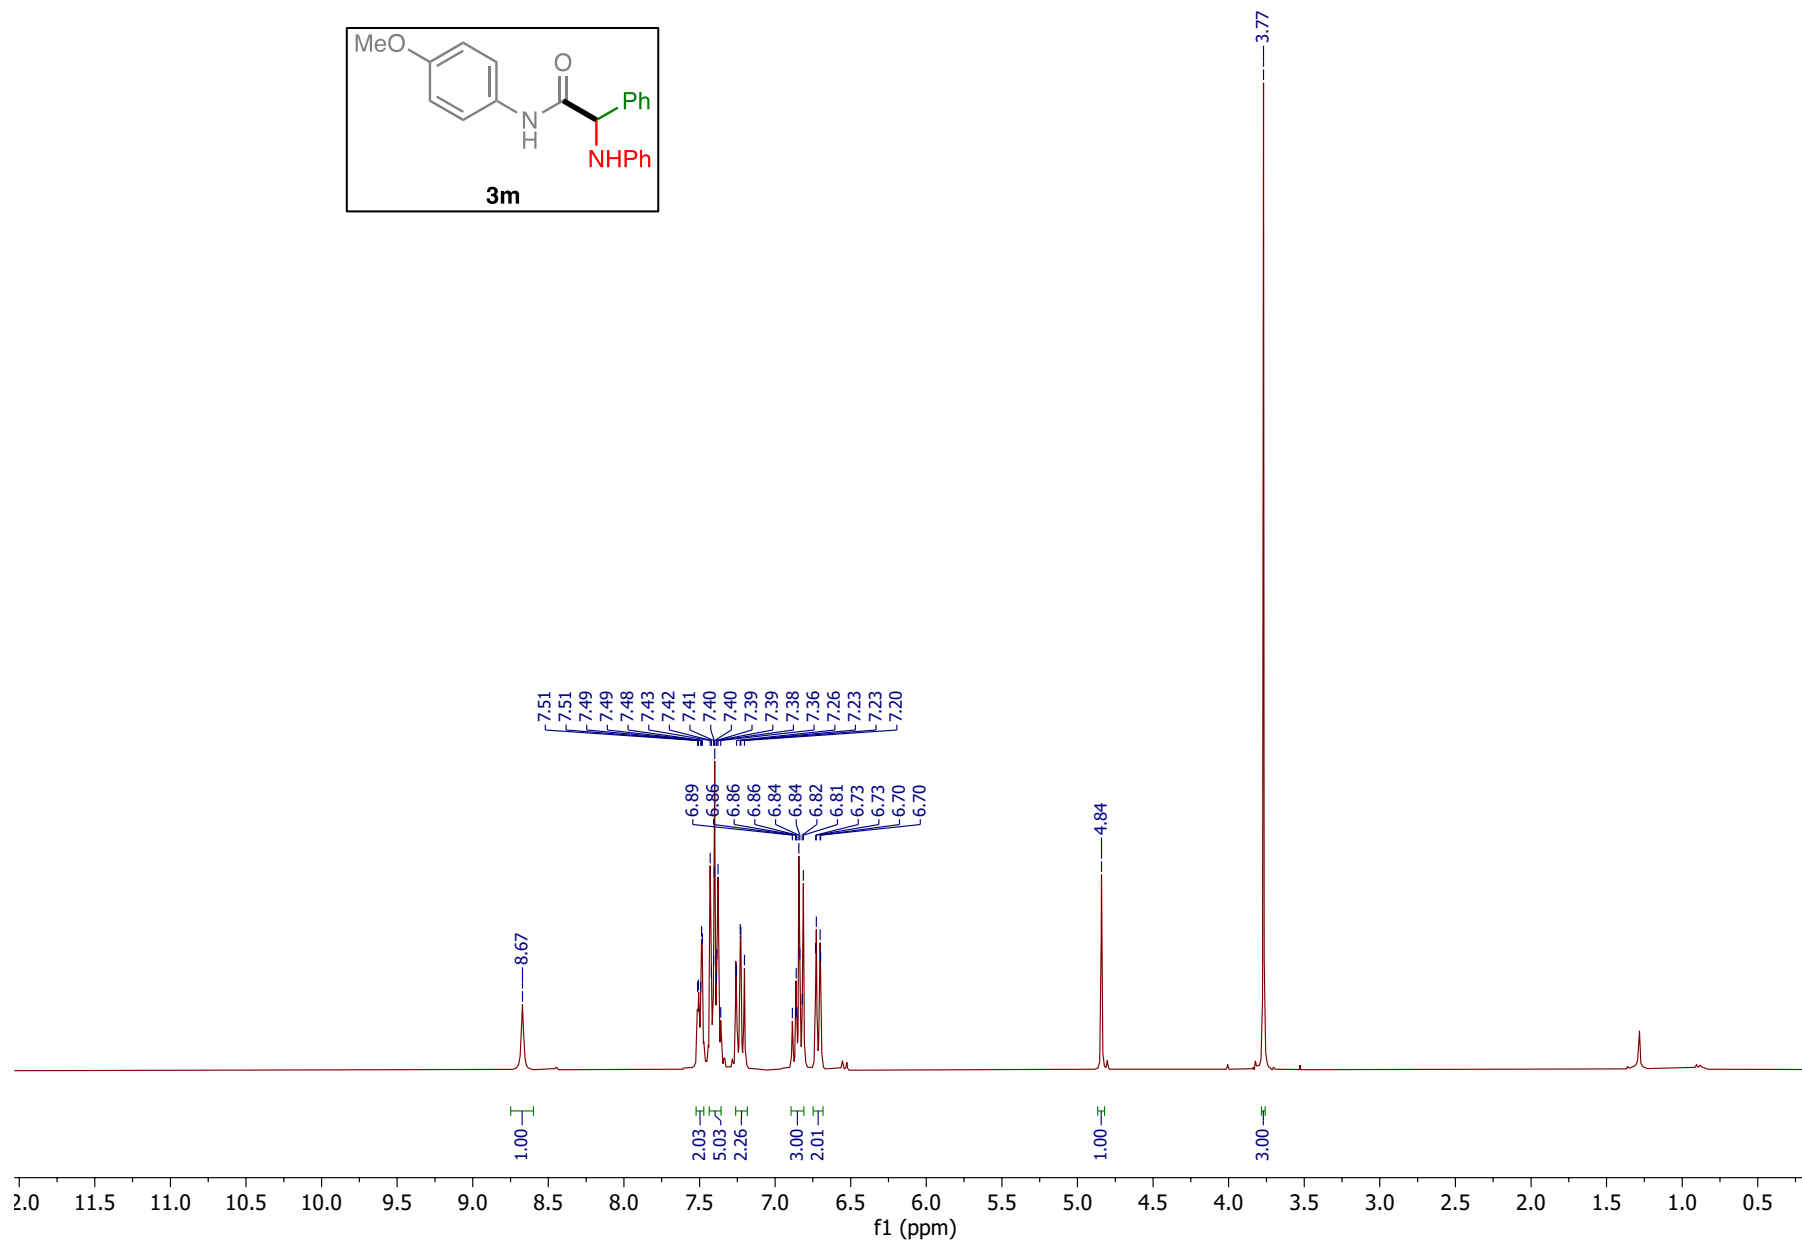

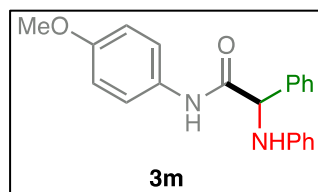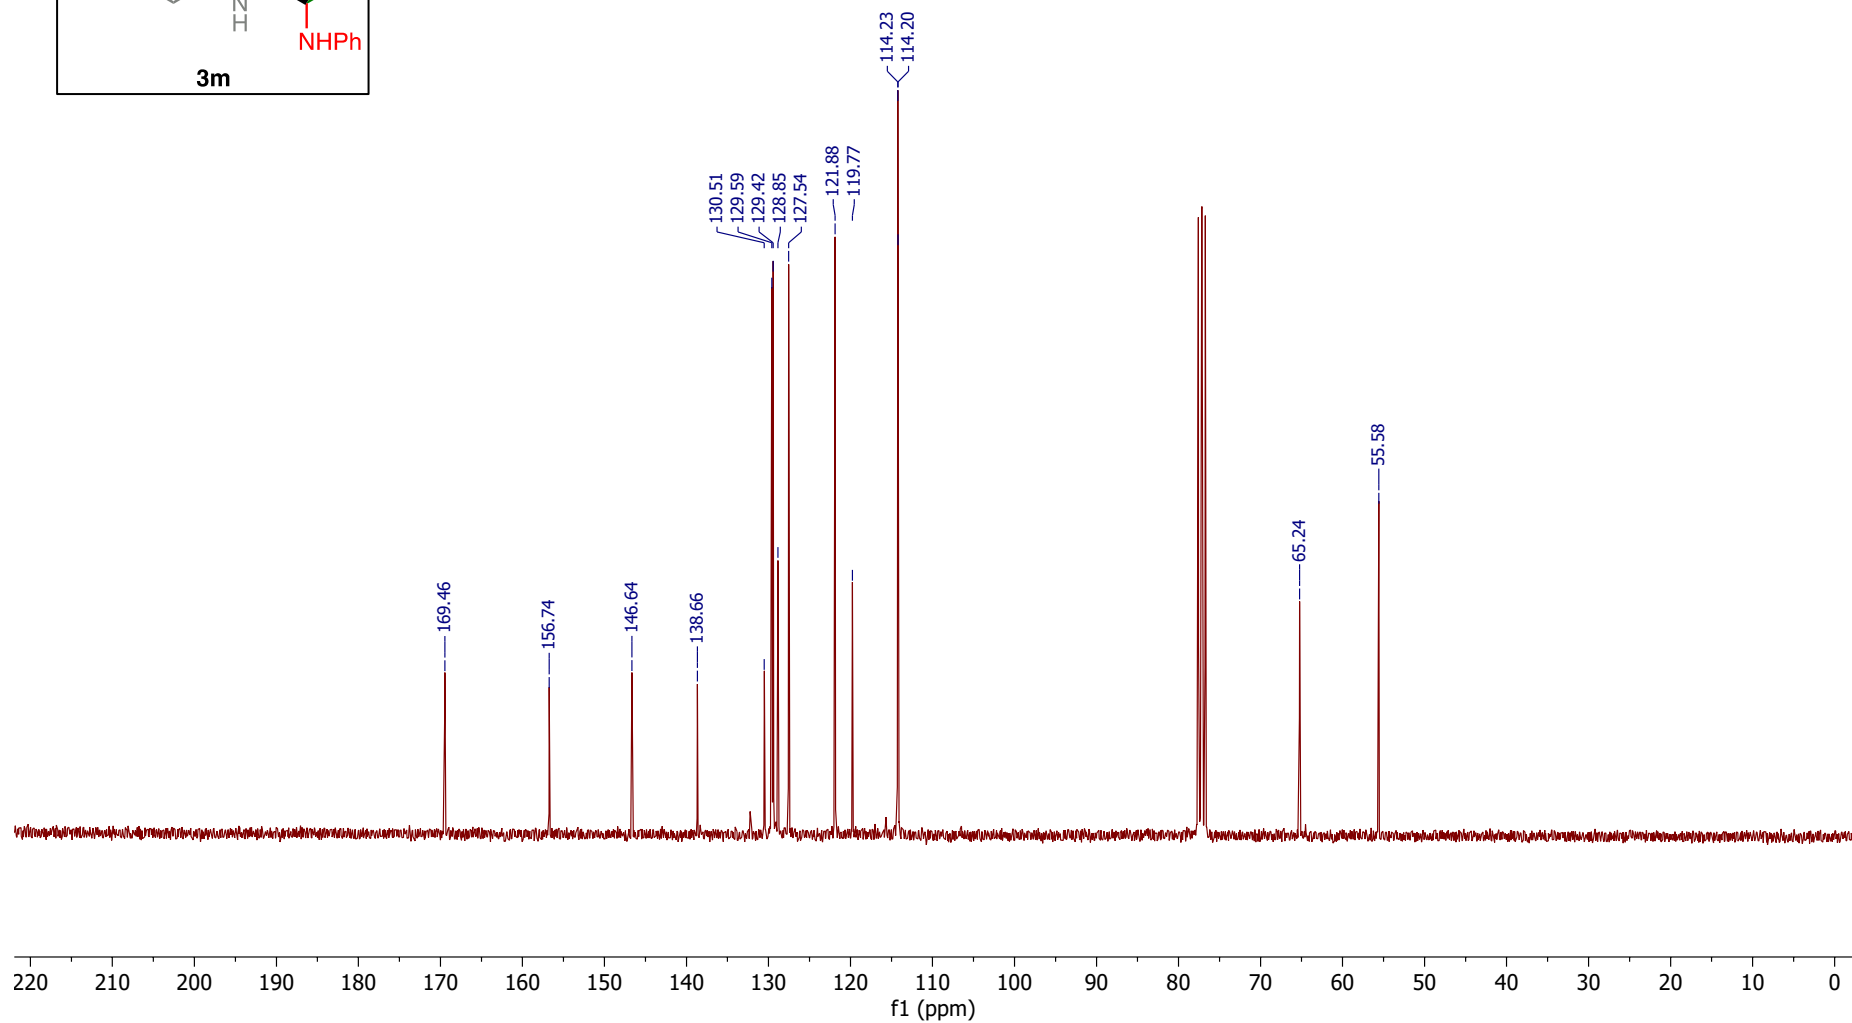



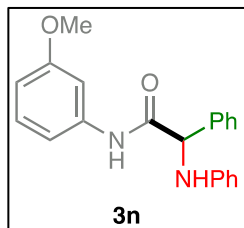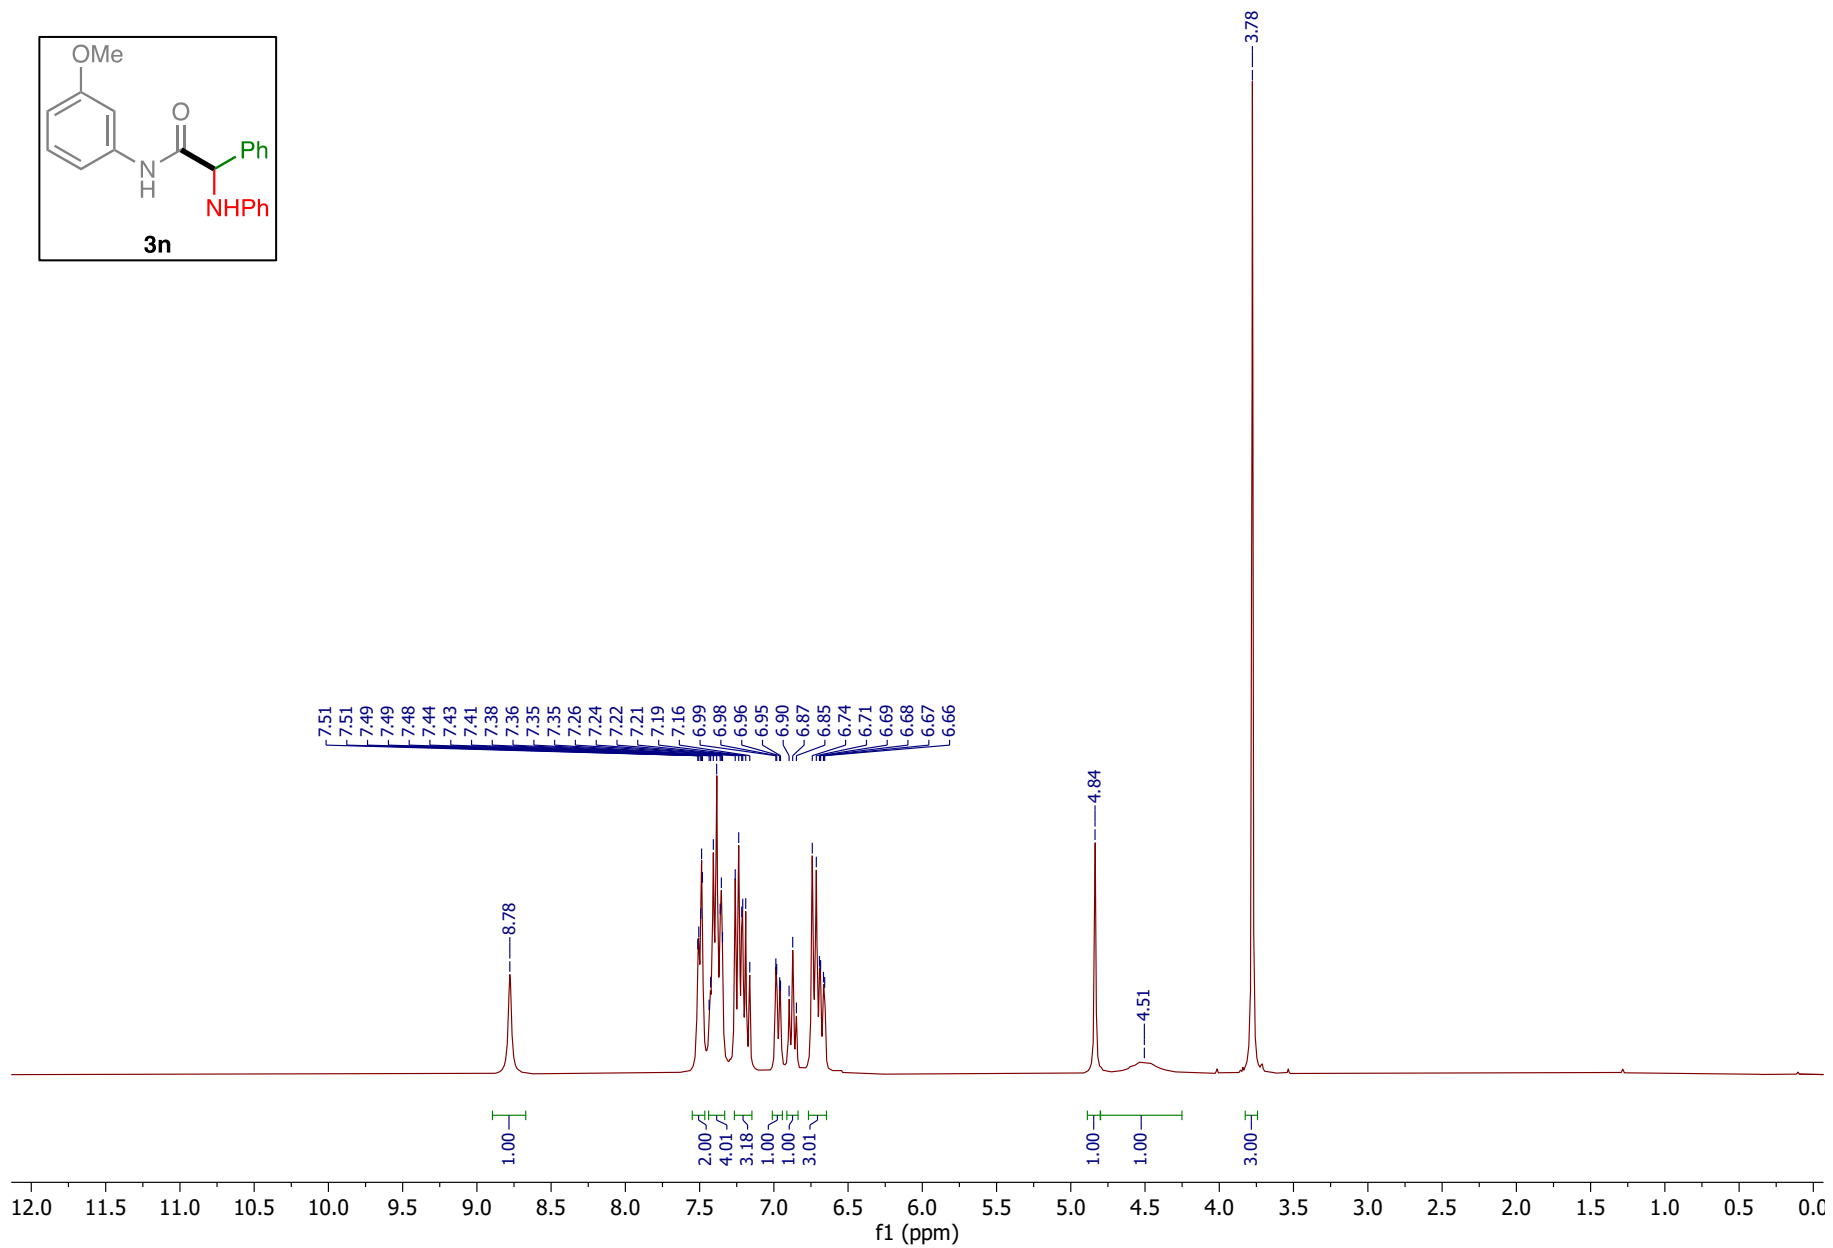

S64

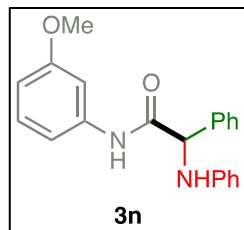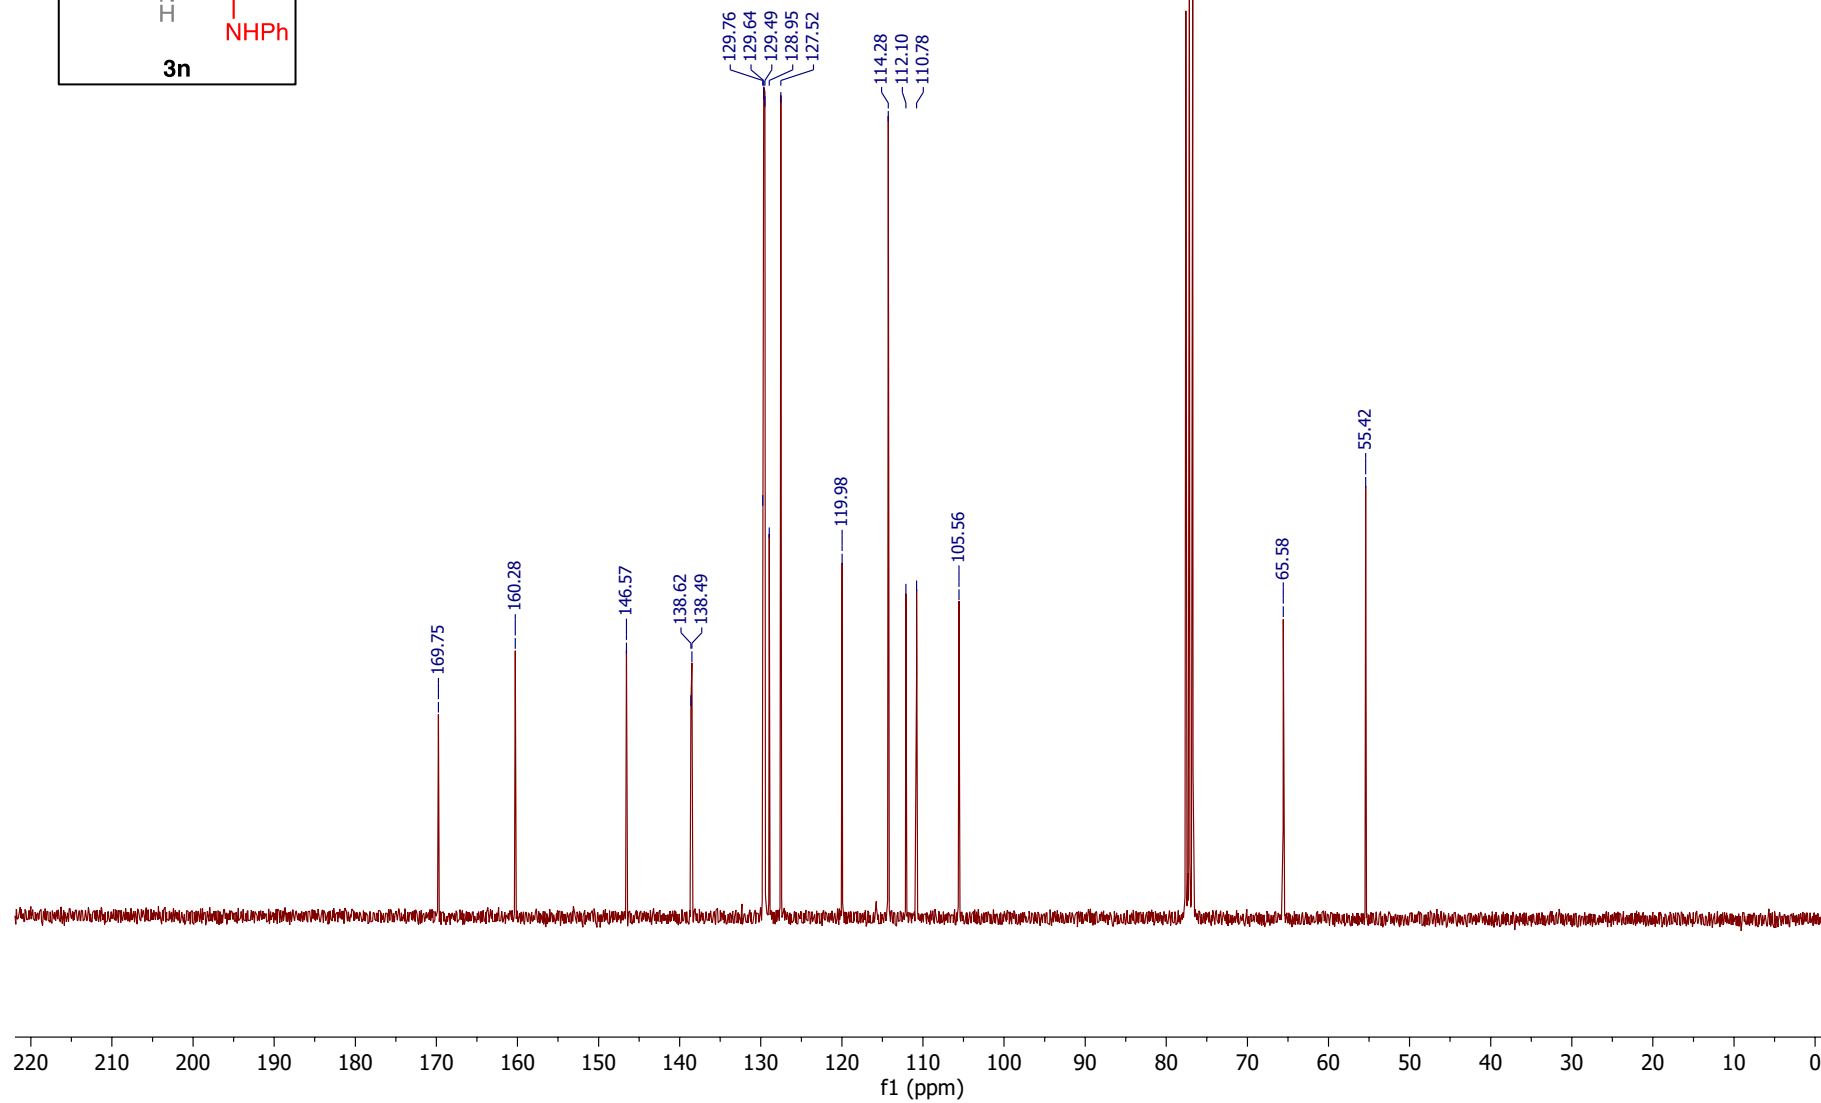

S65

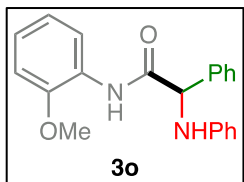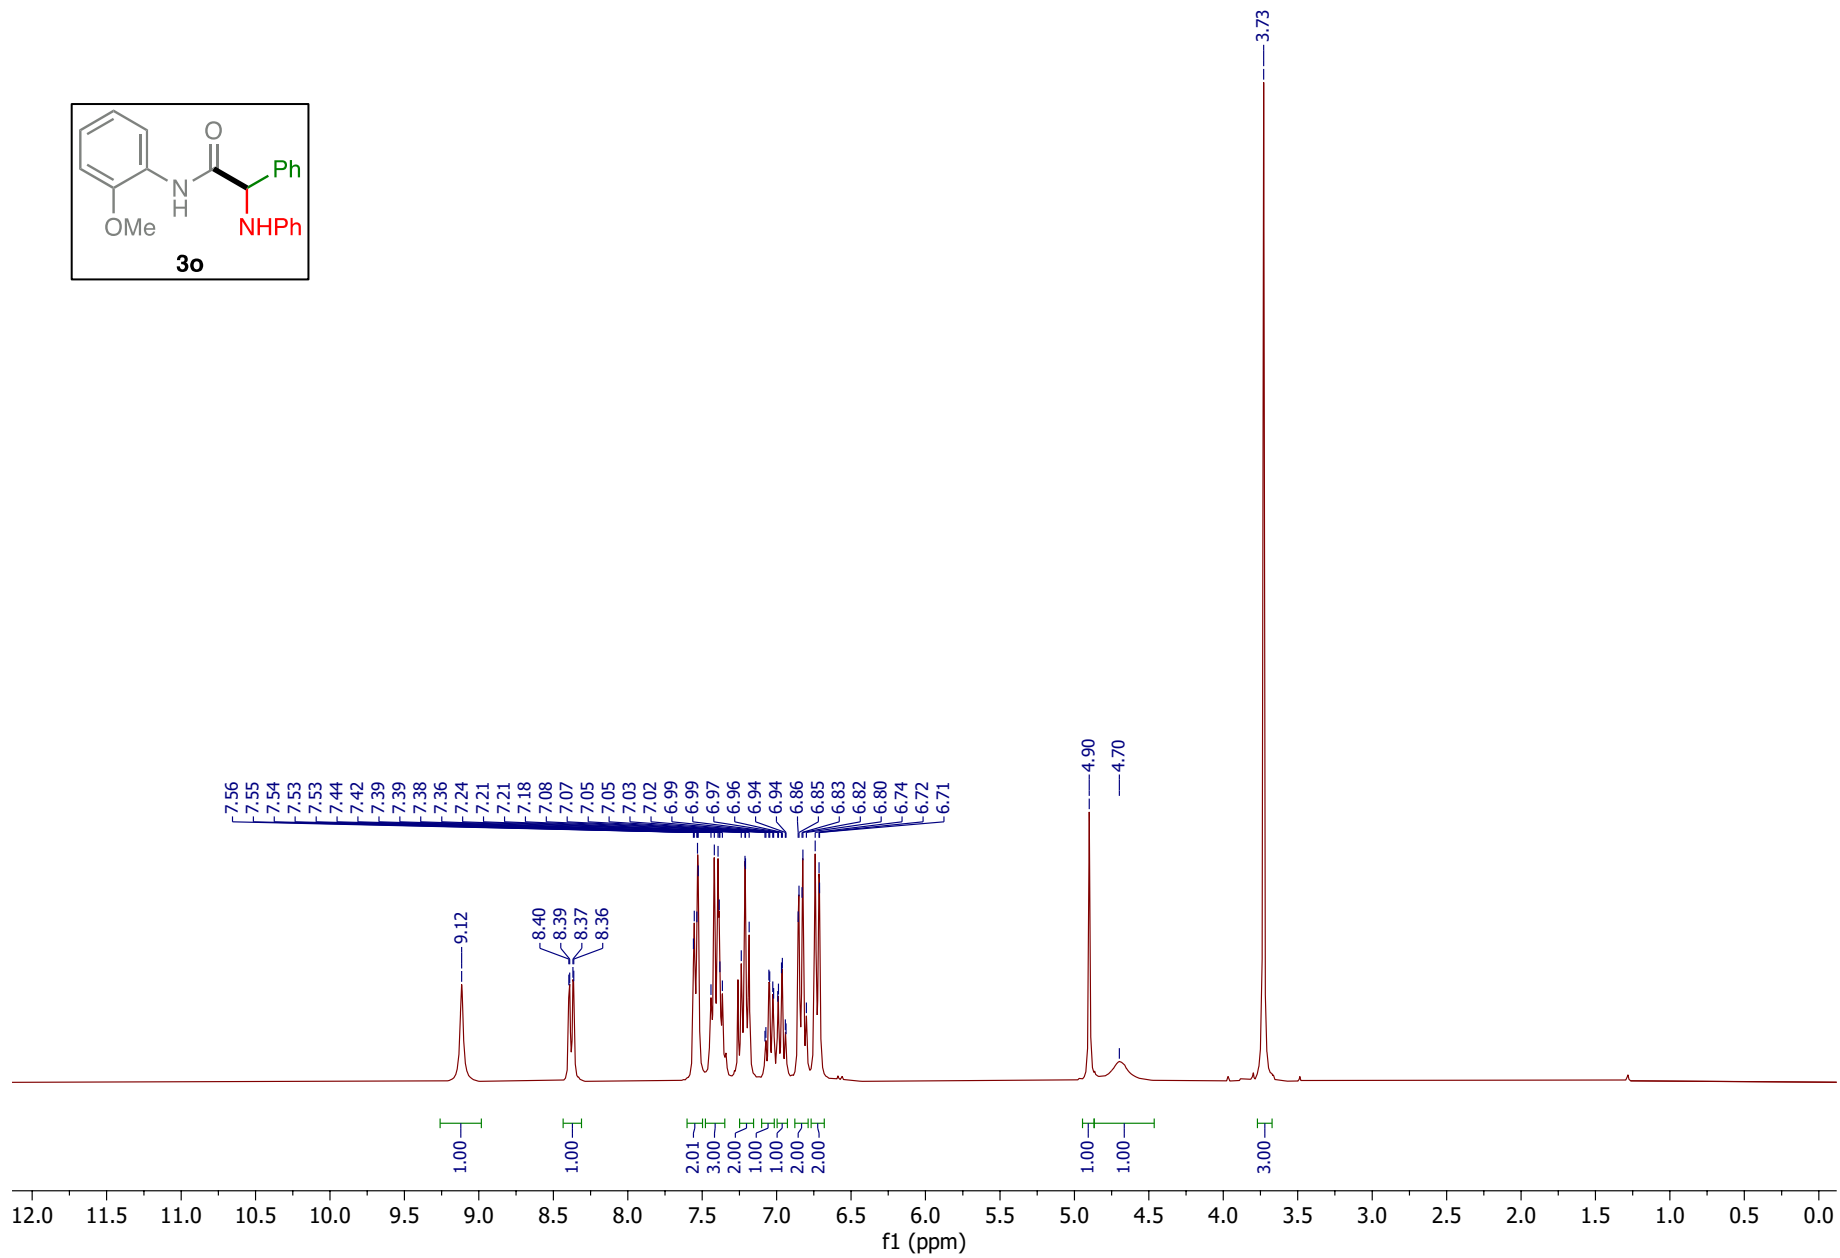

S66

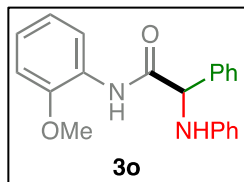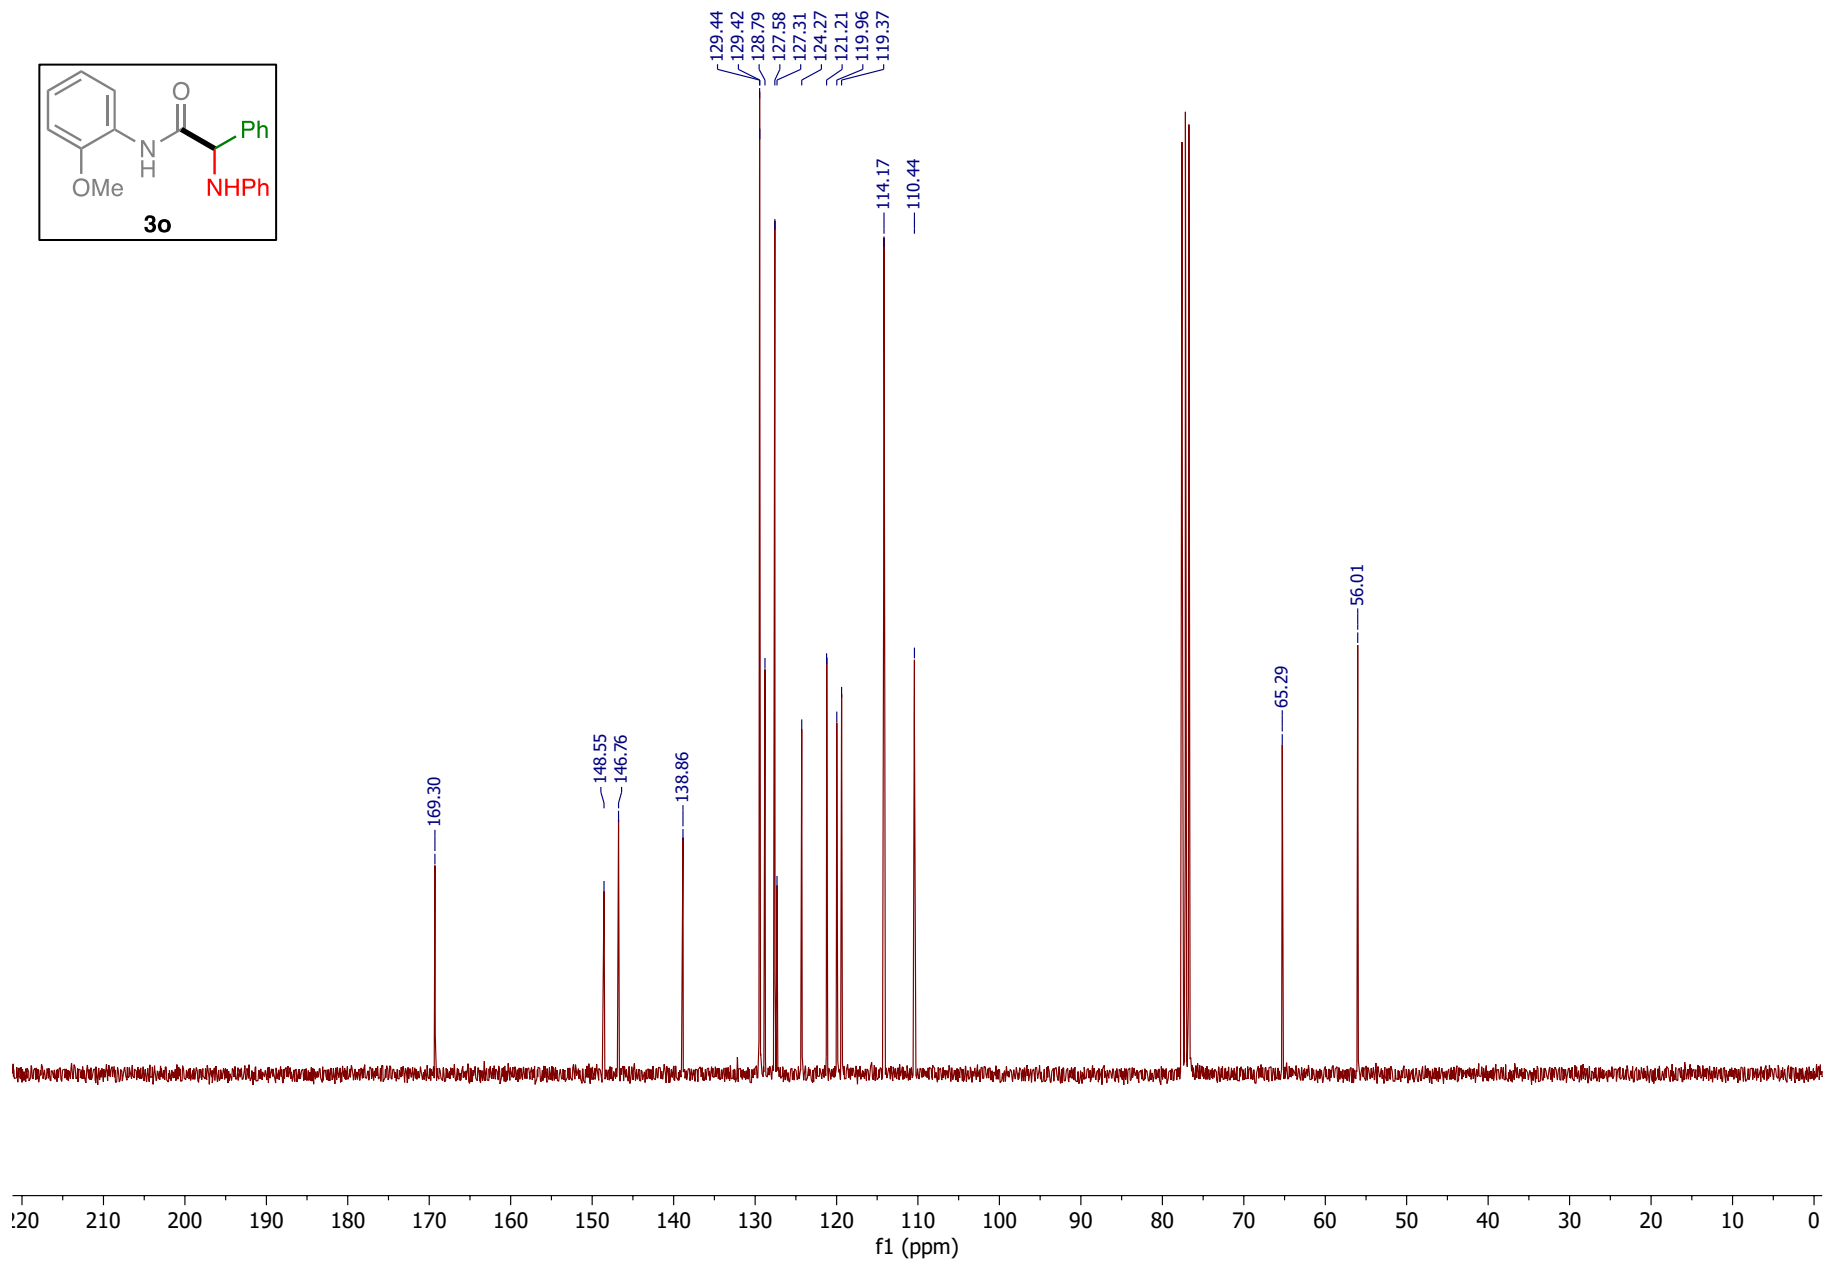

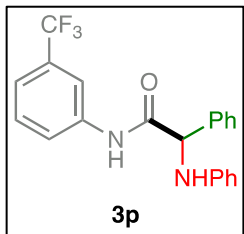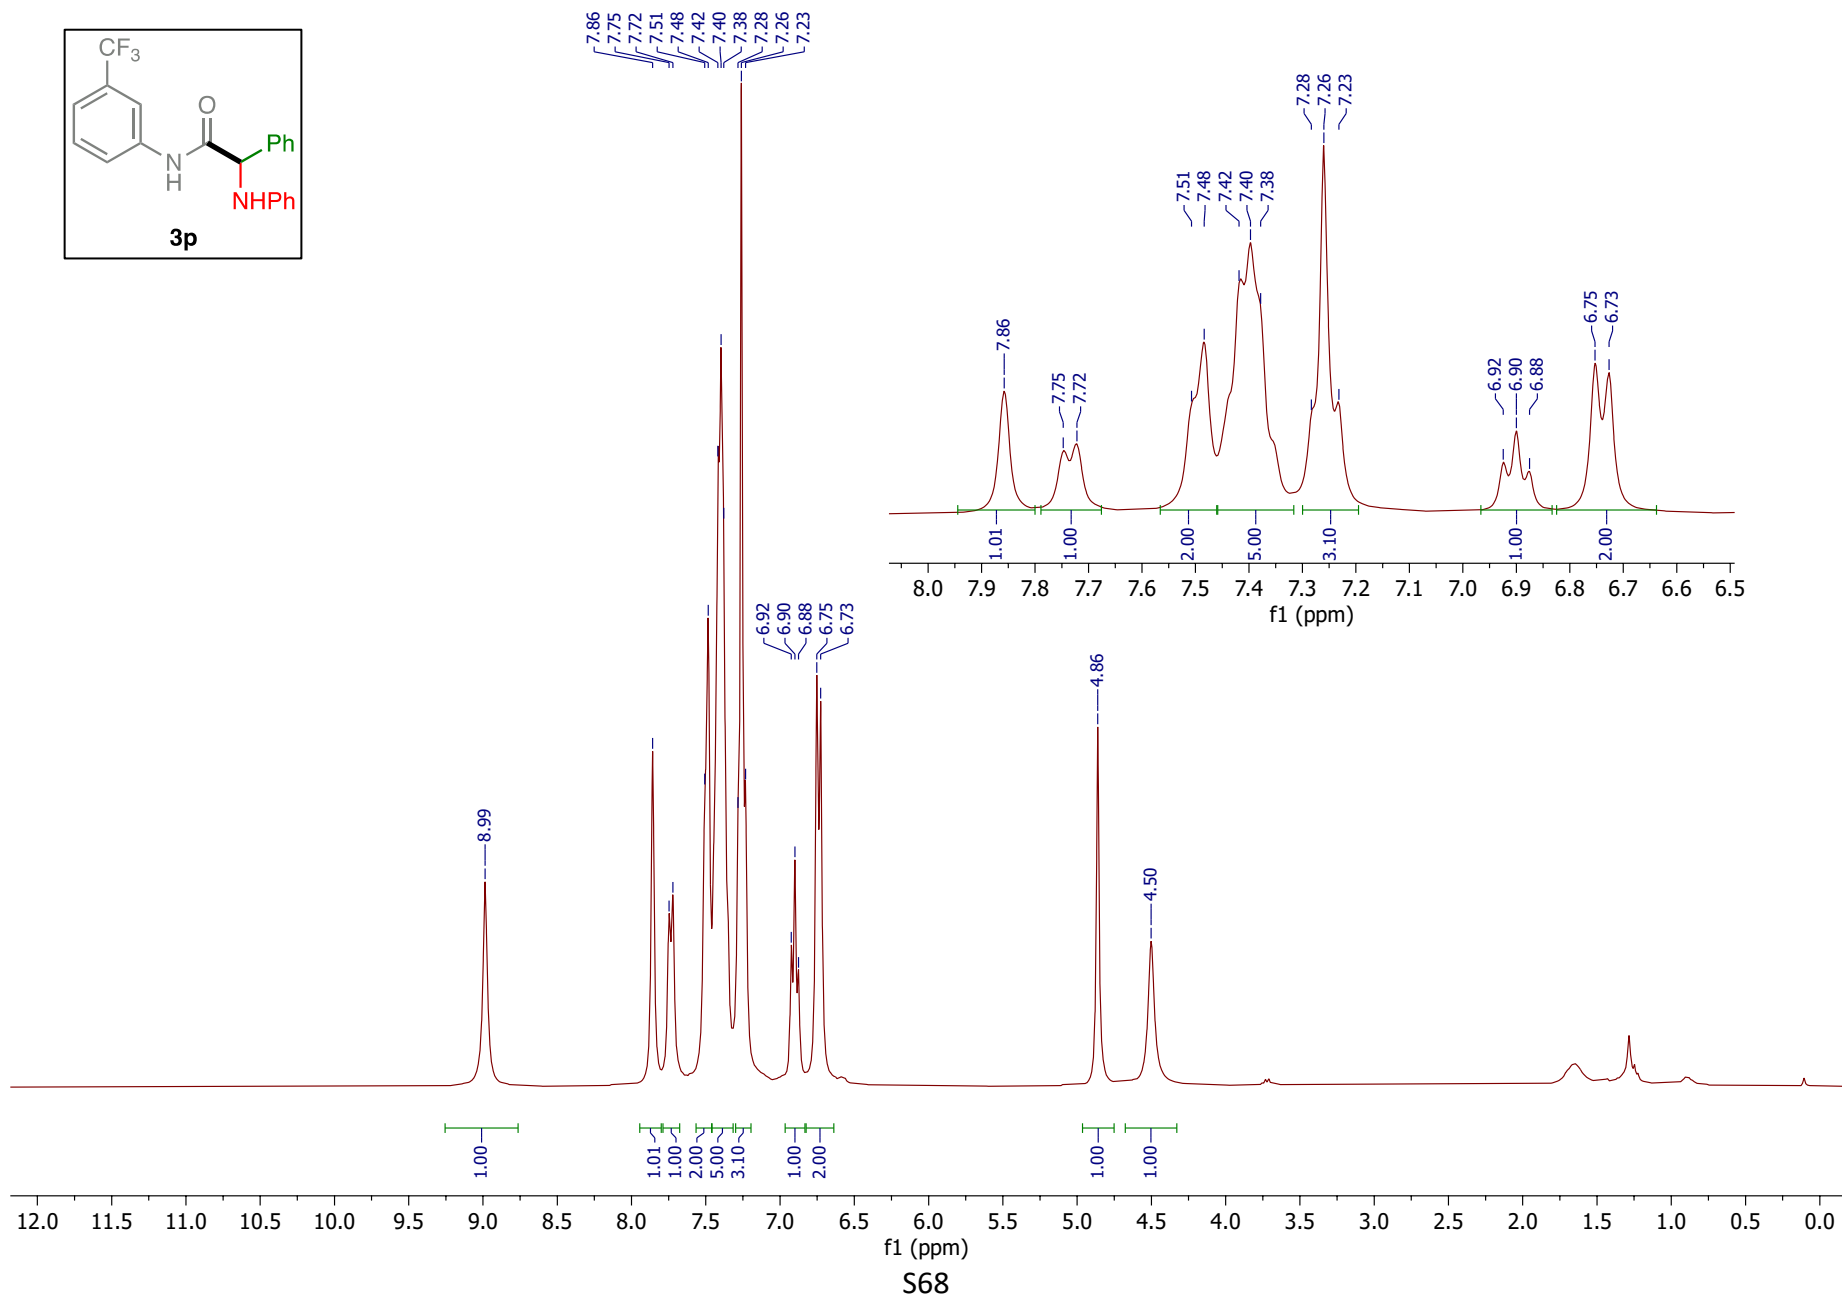

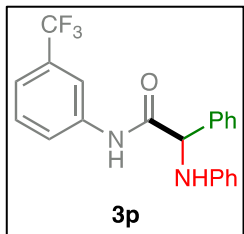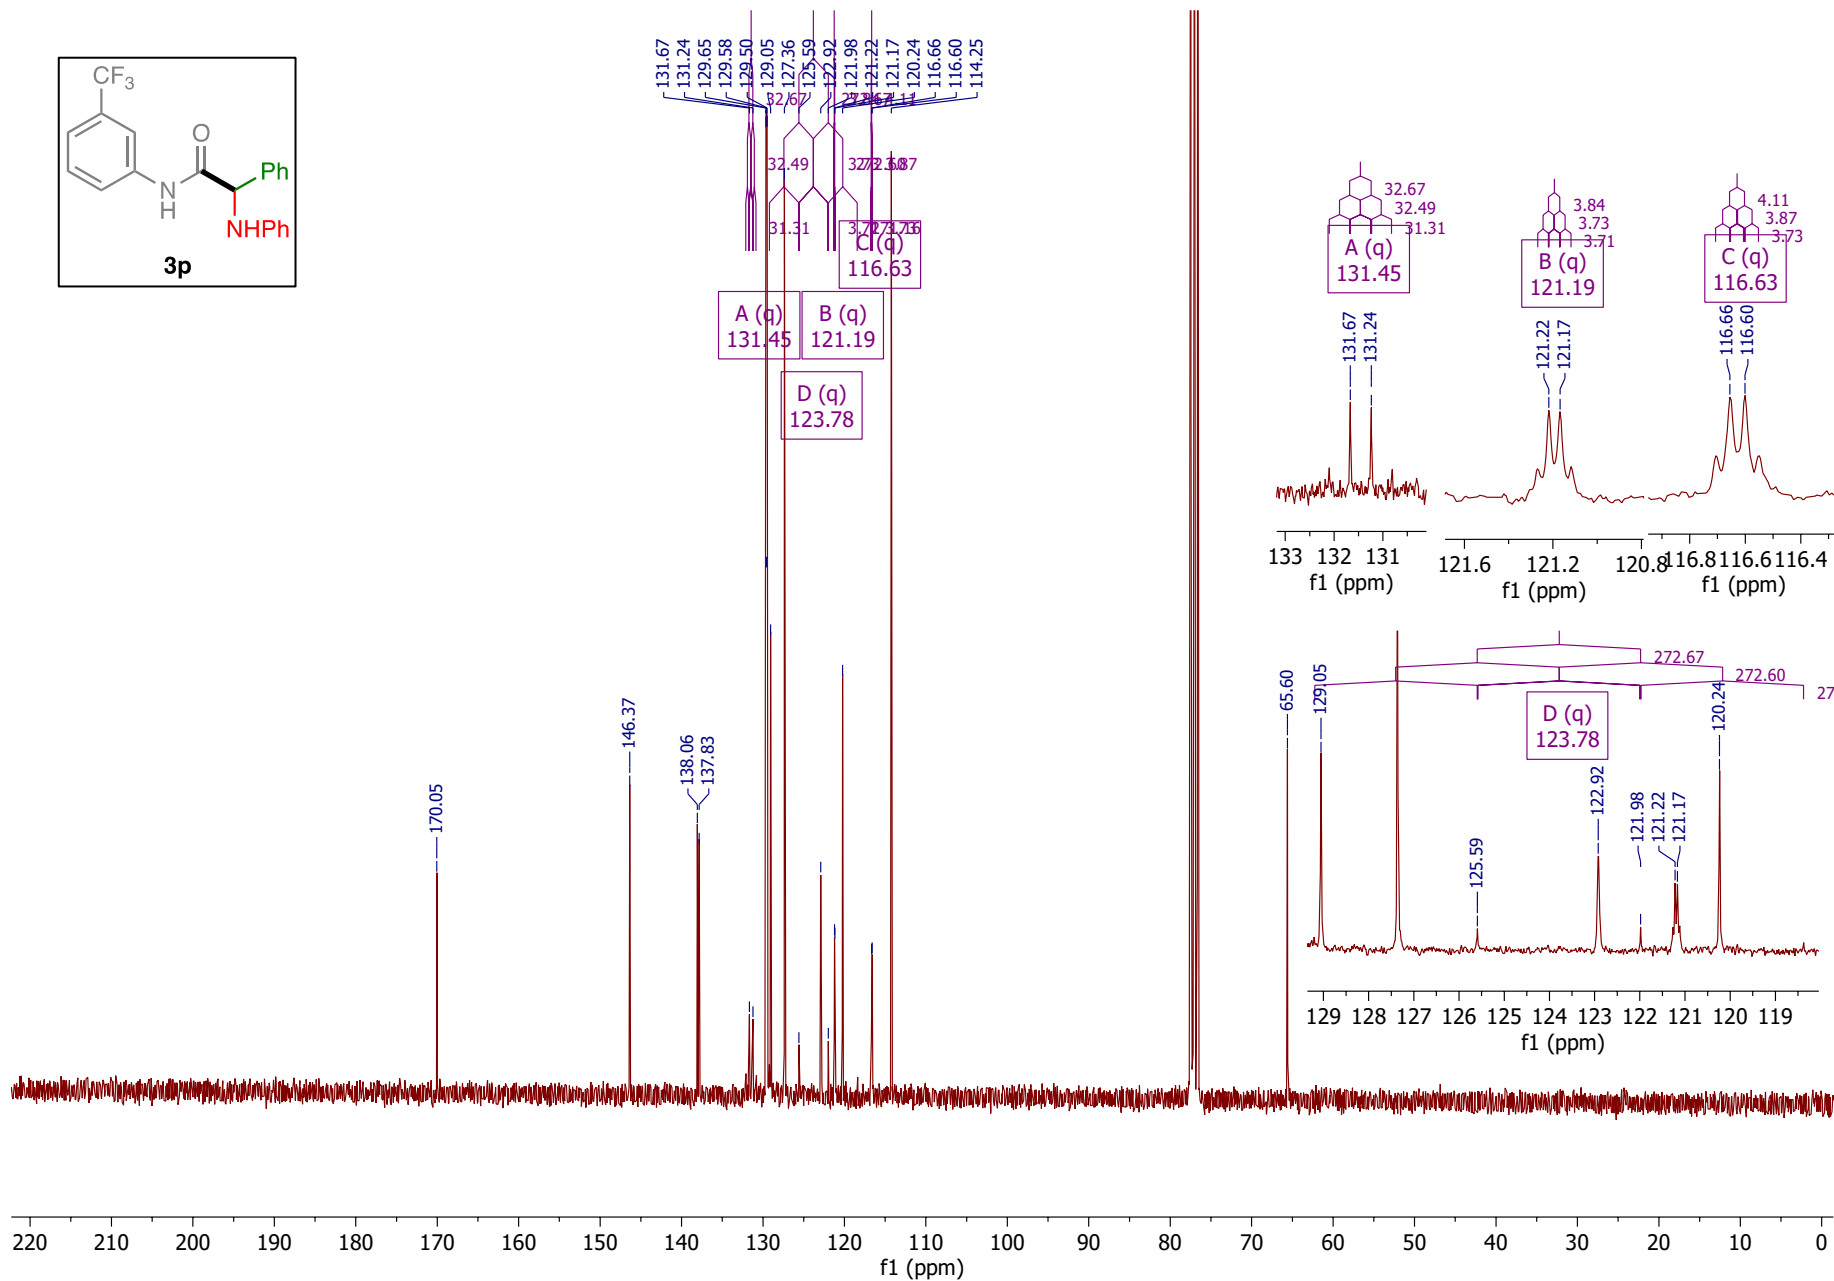

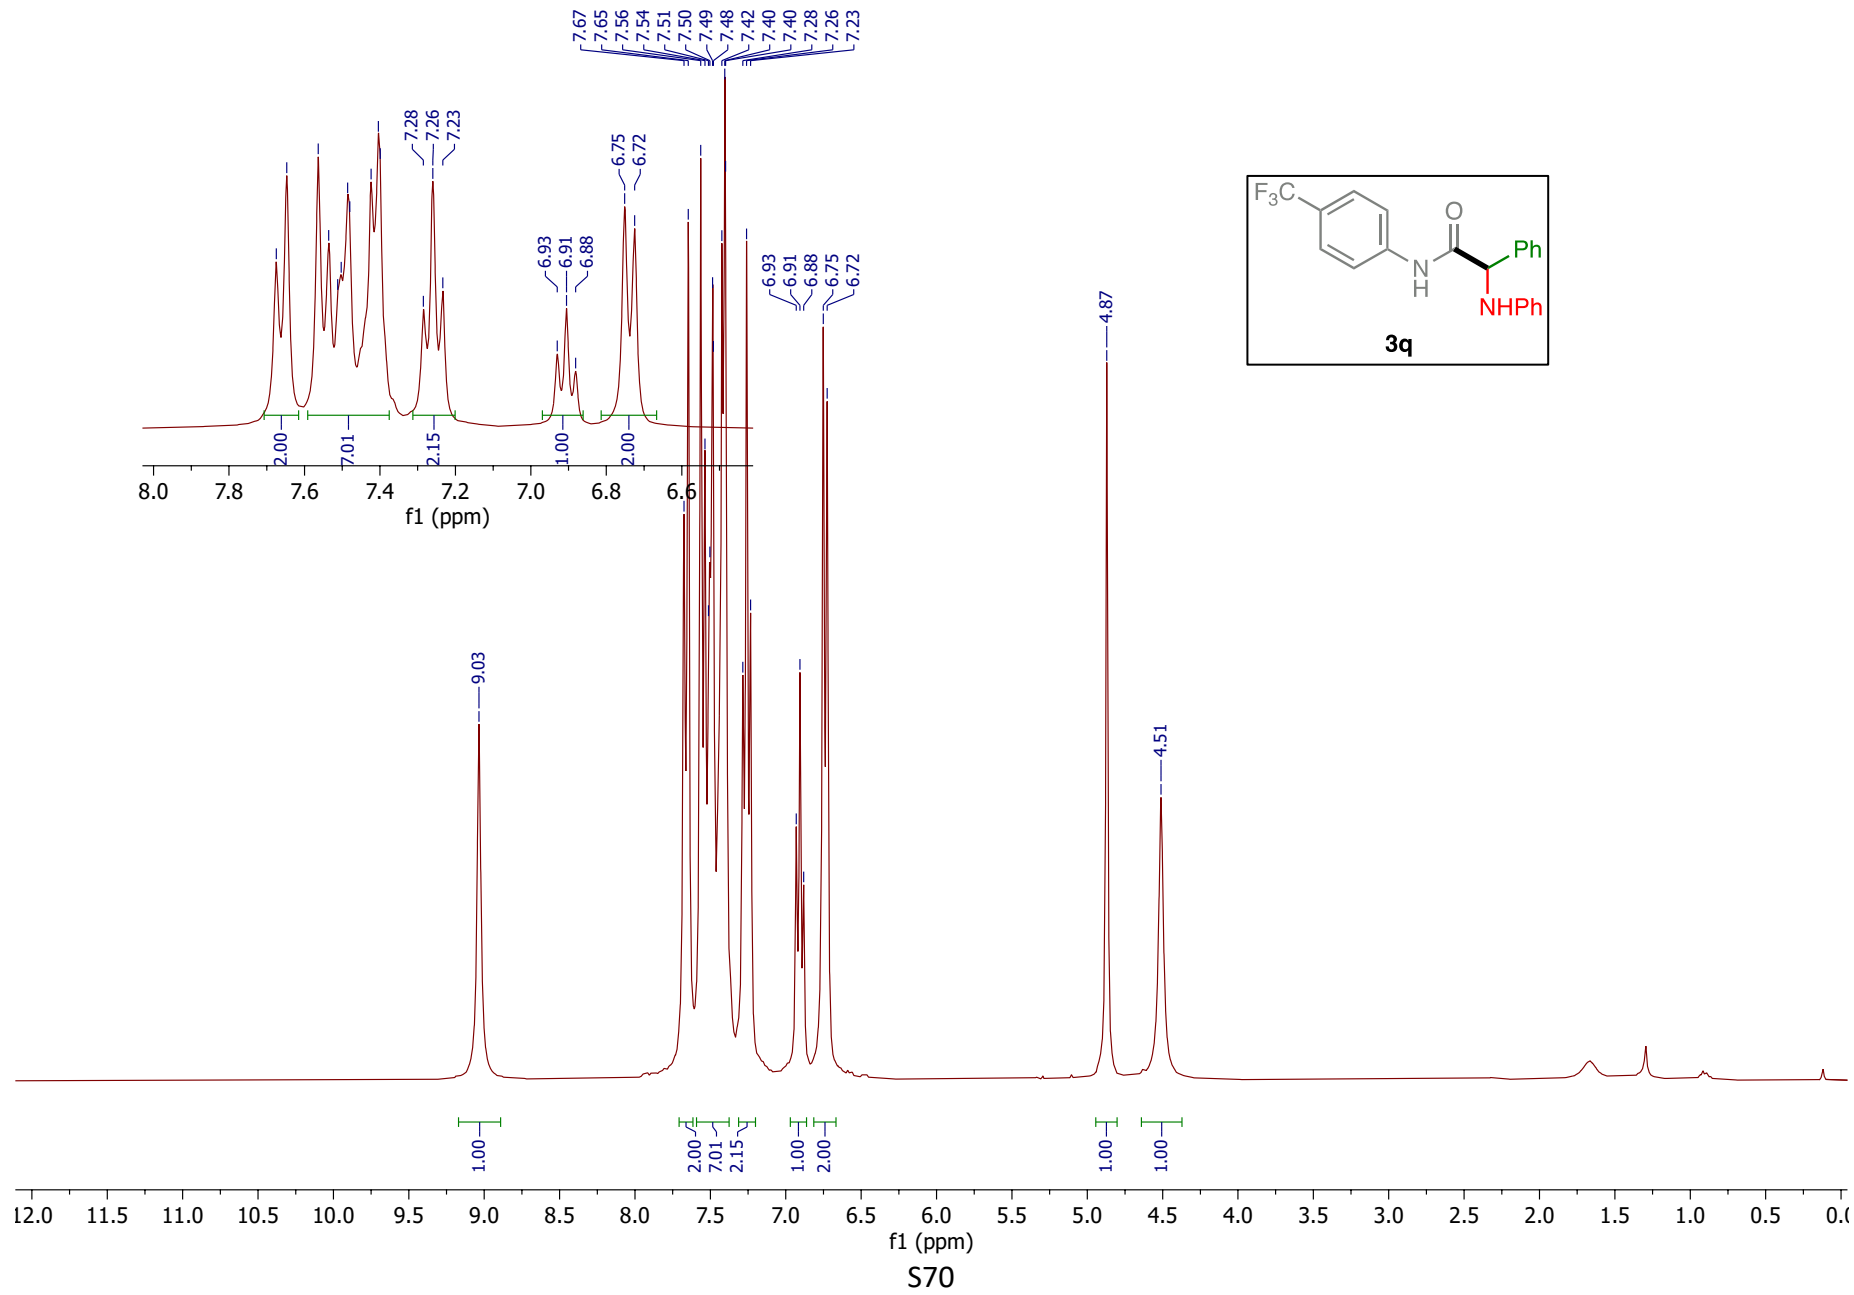

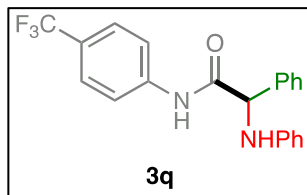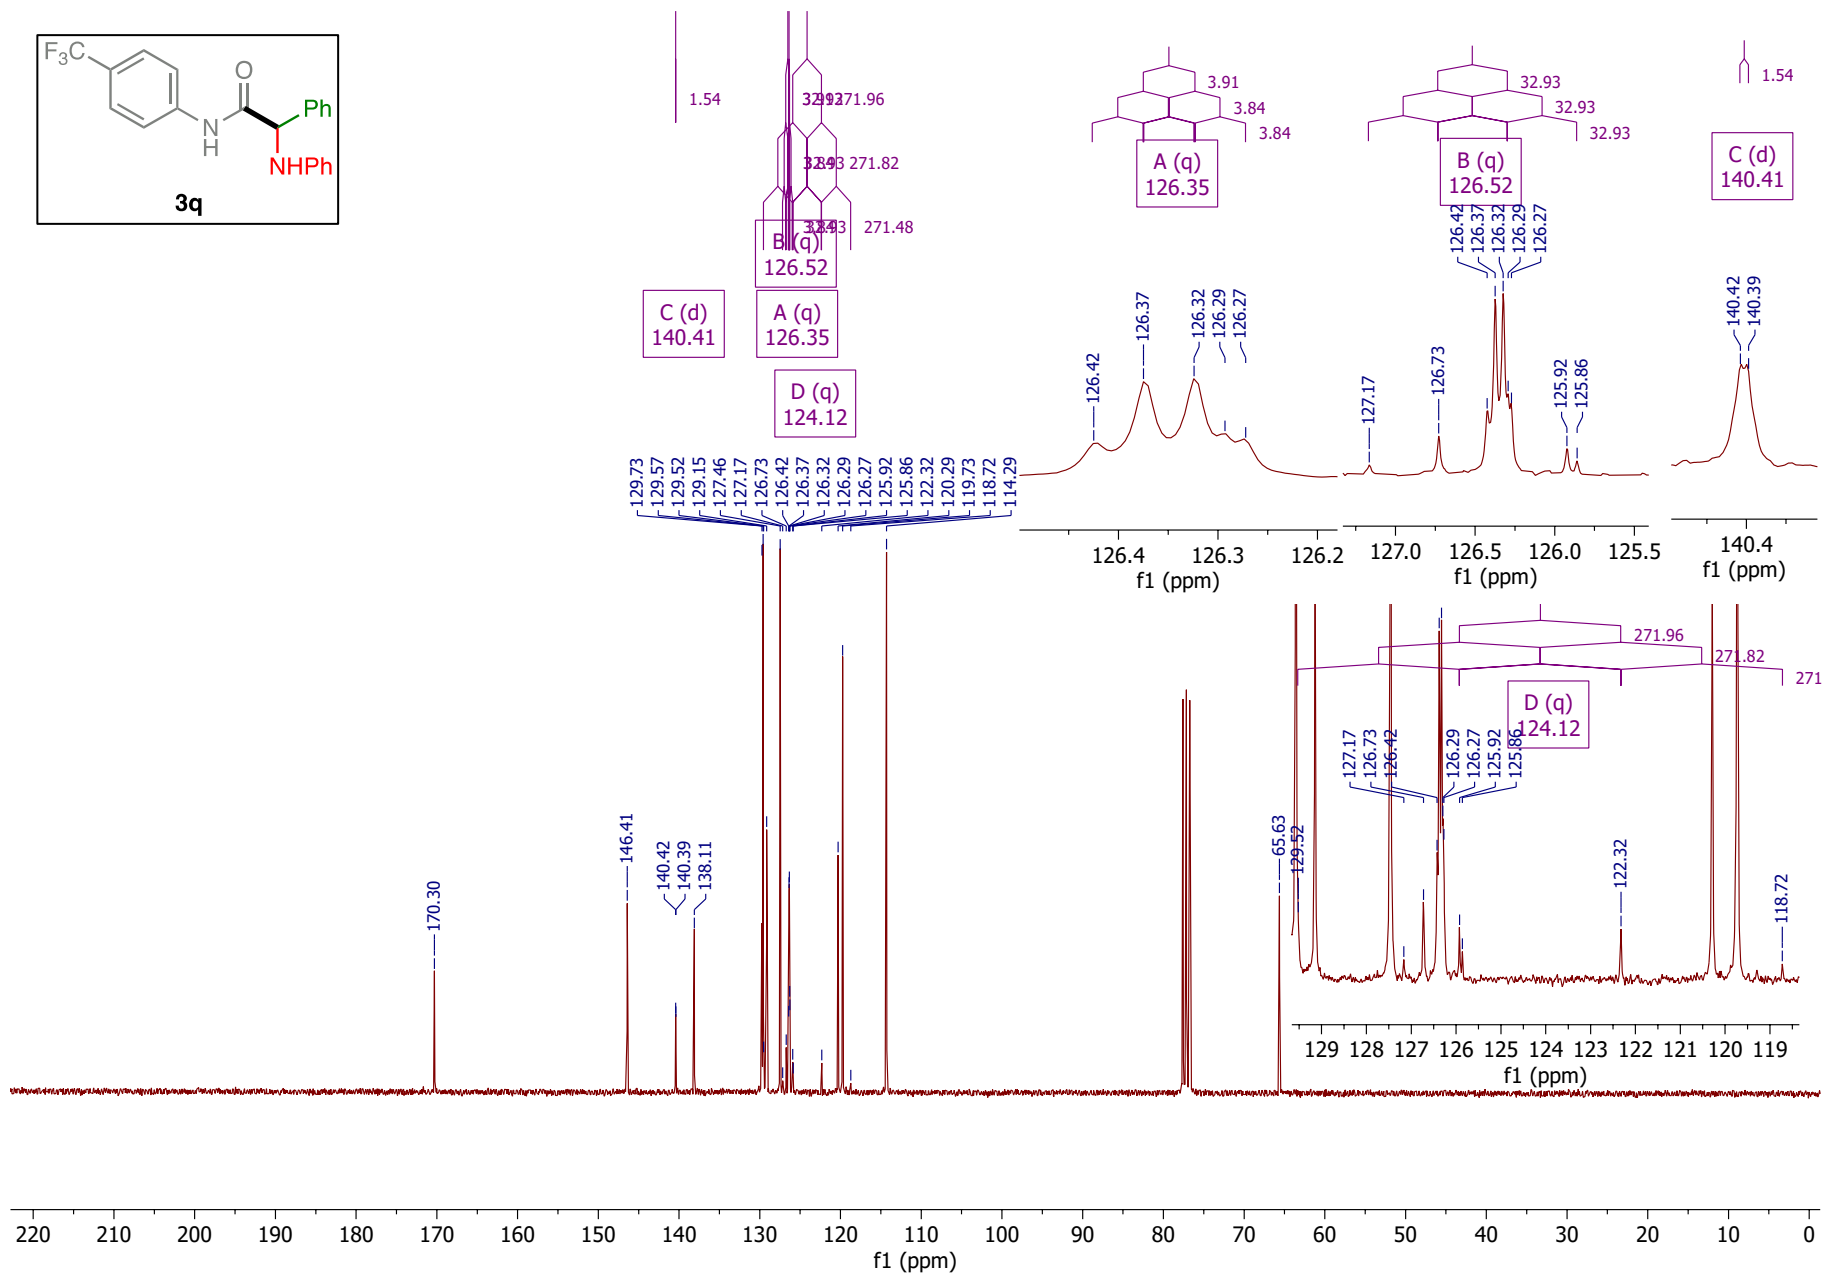



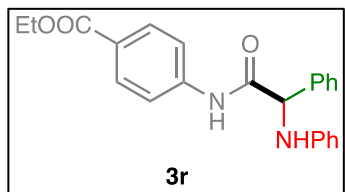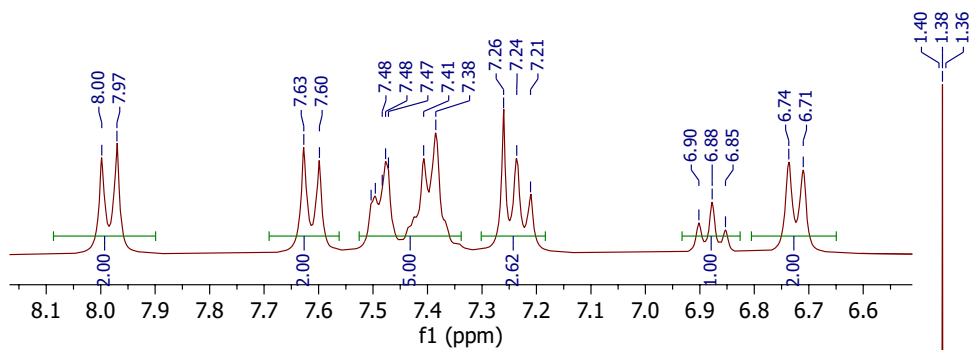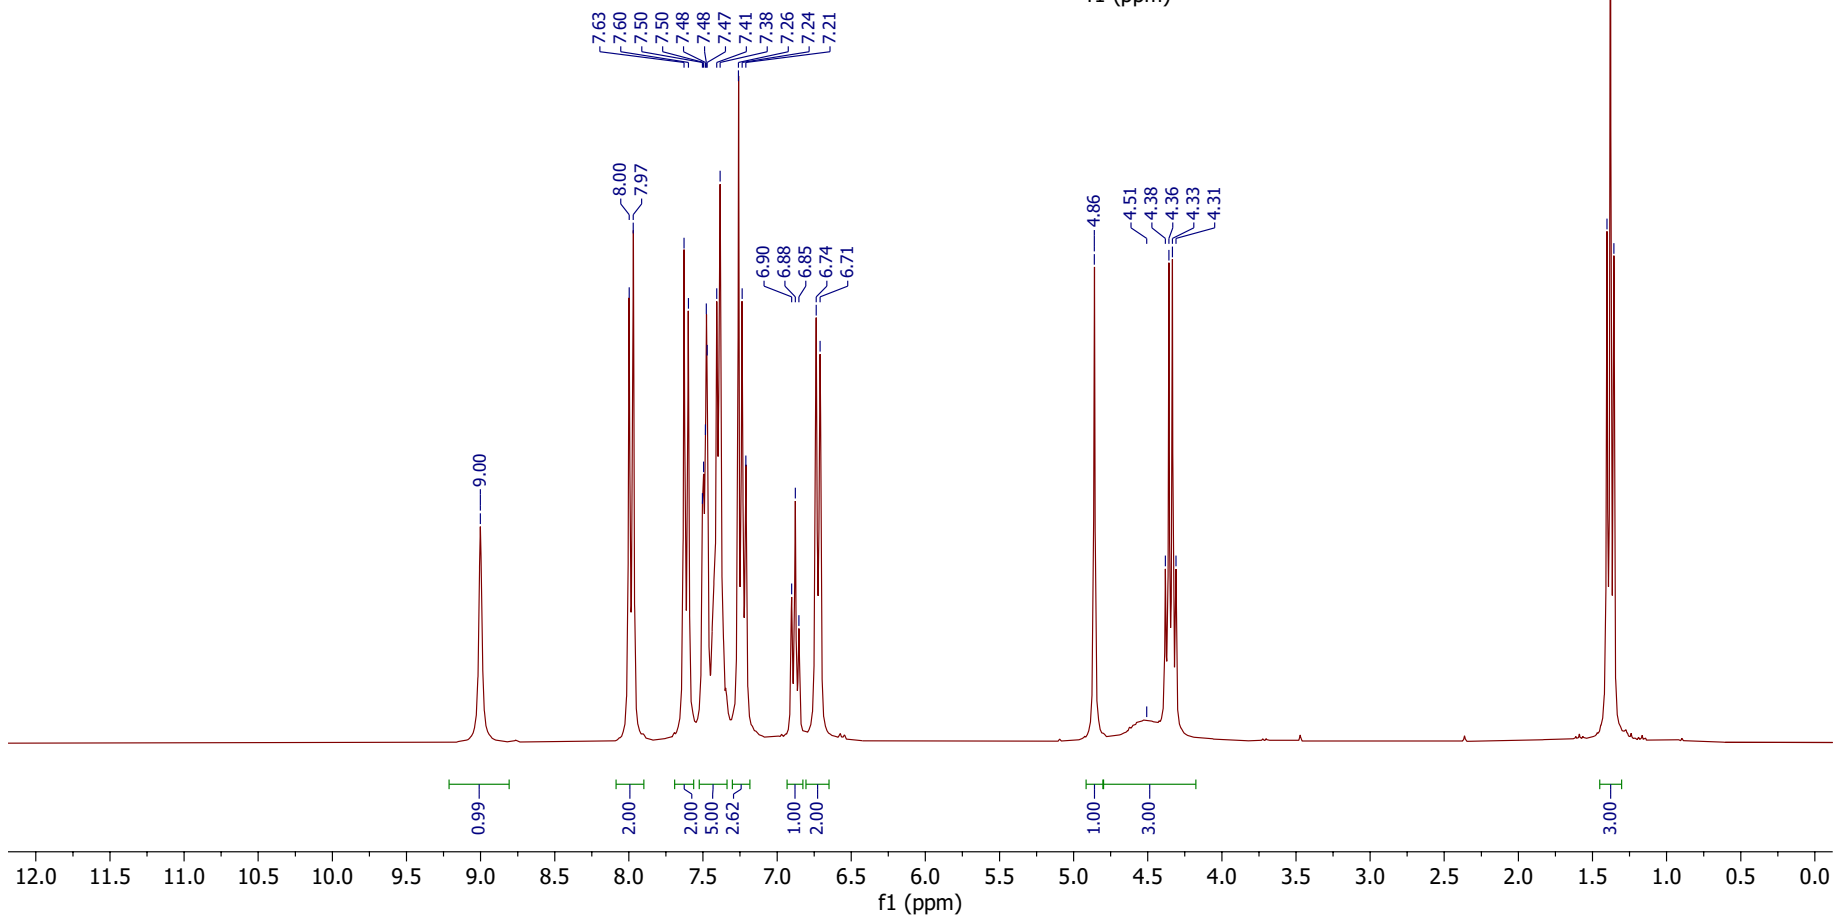

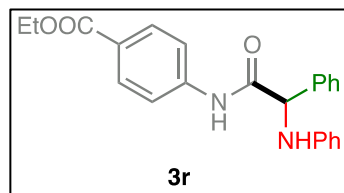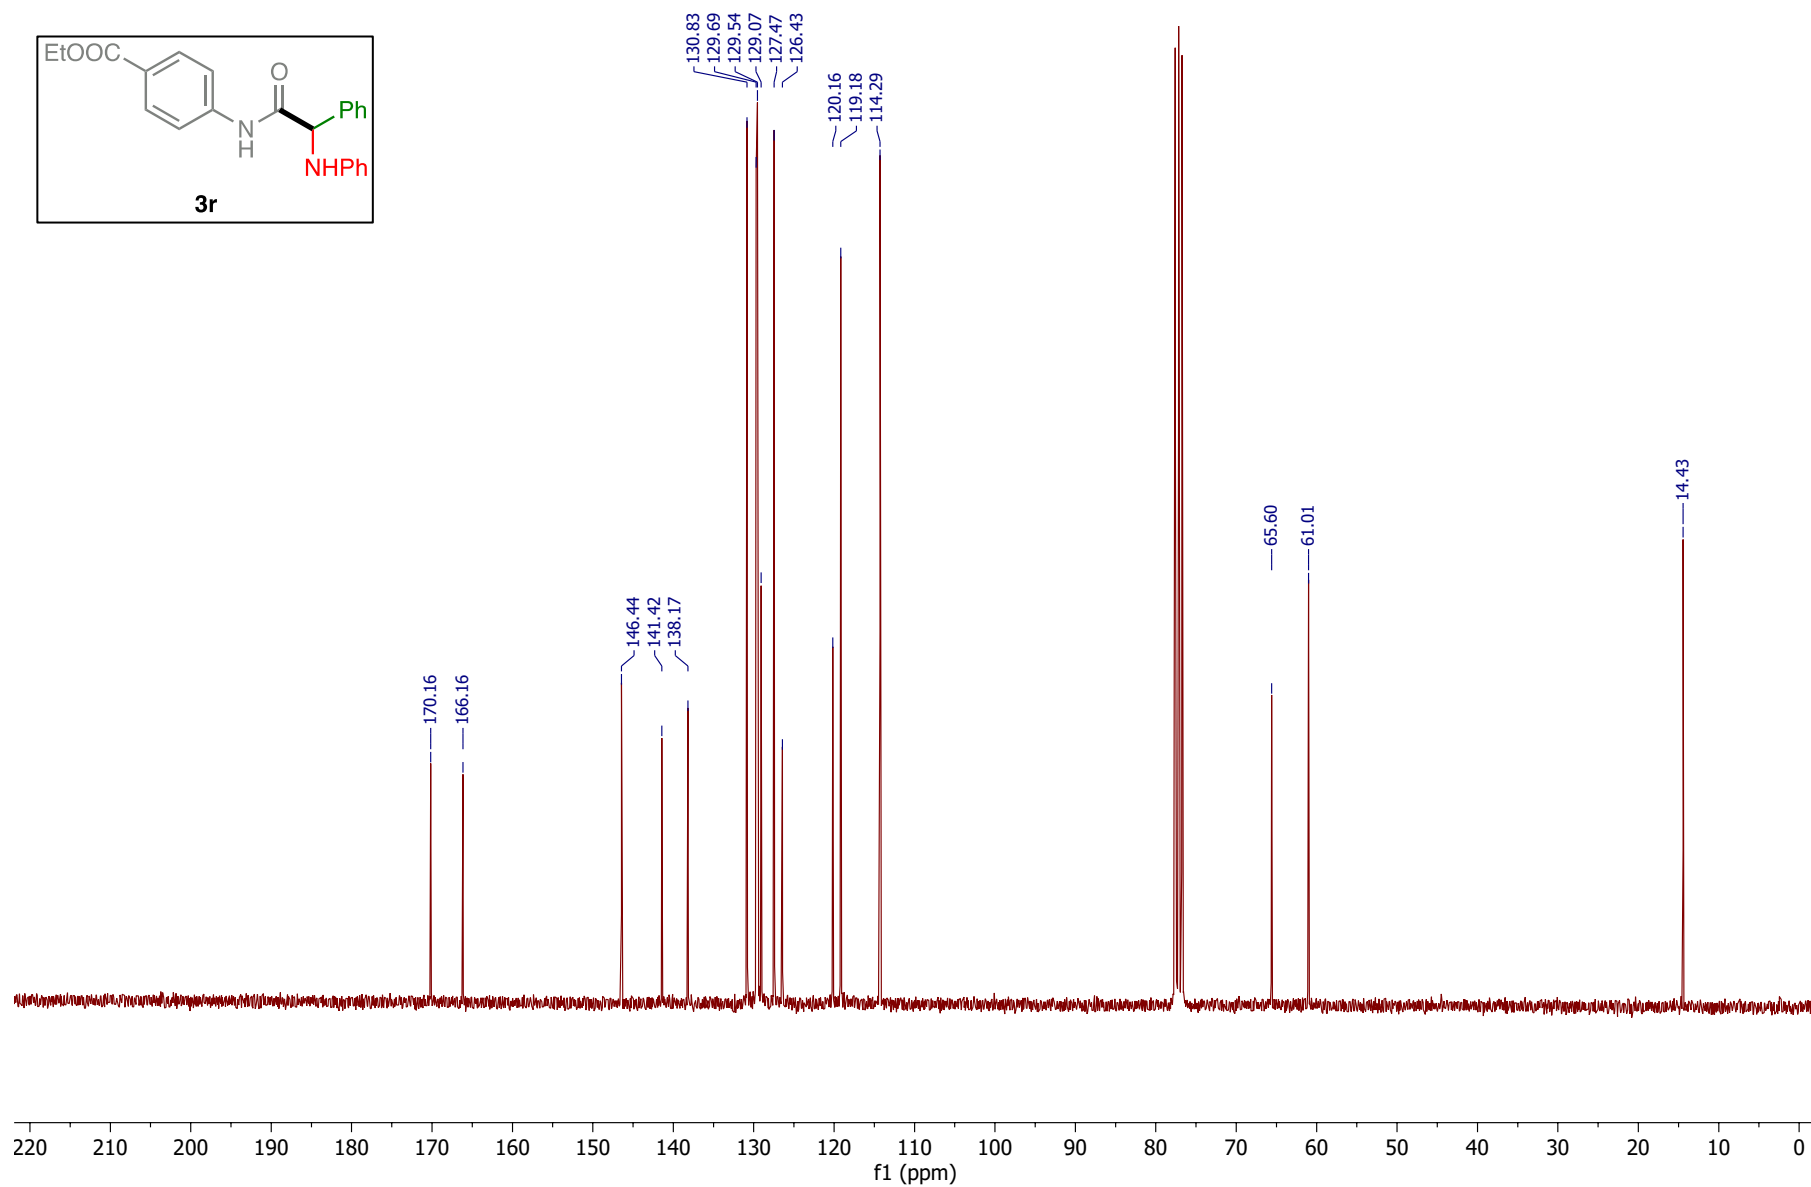

S73

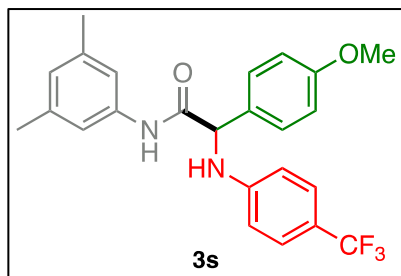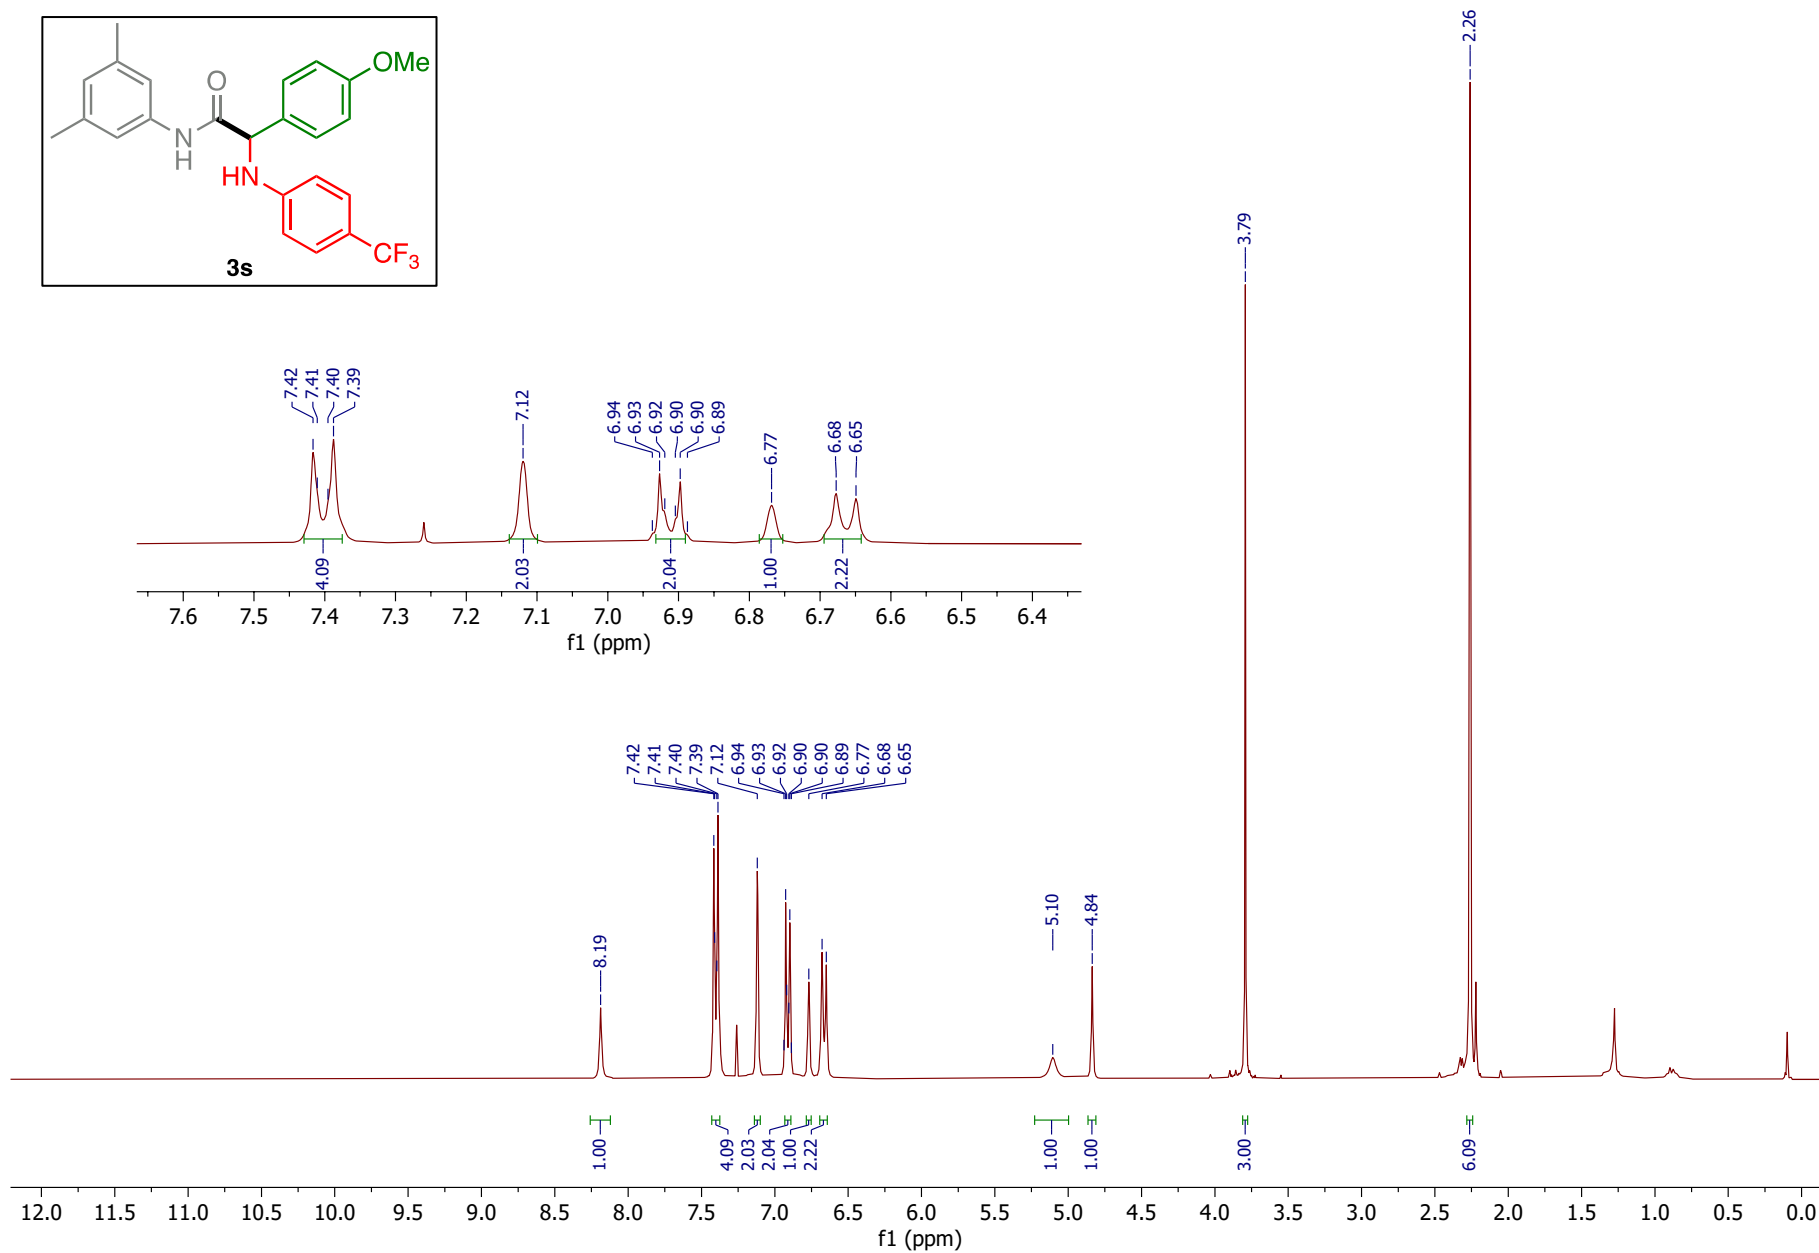

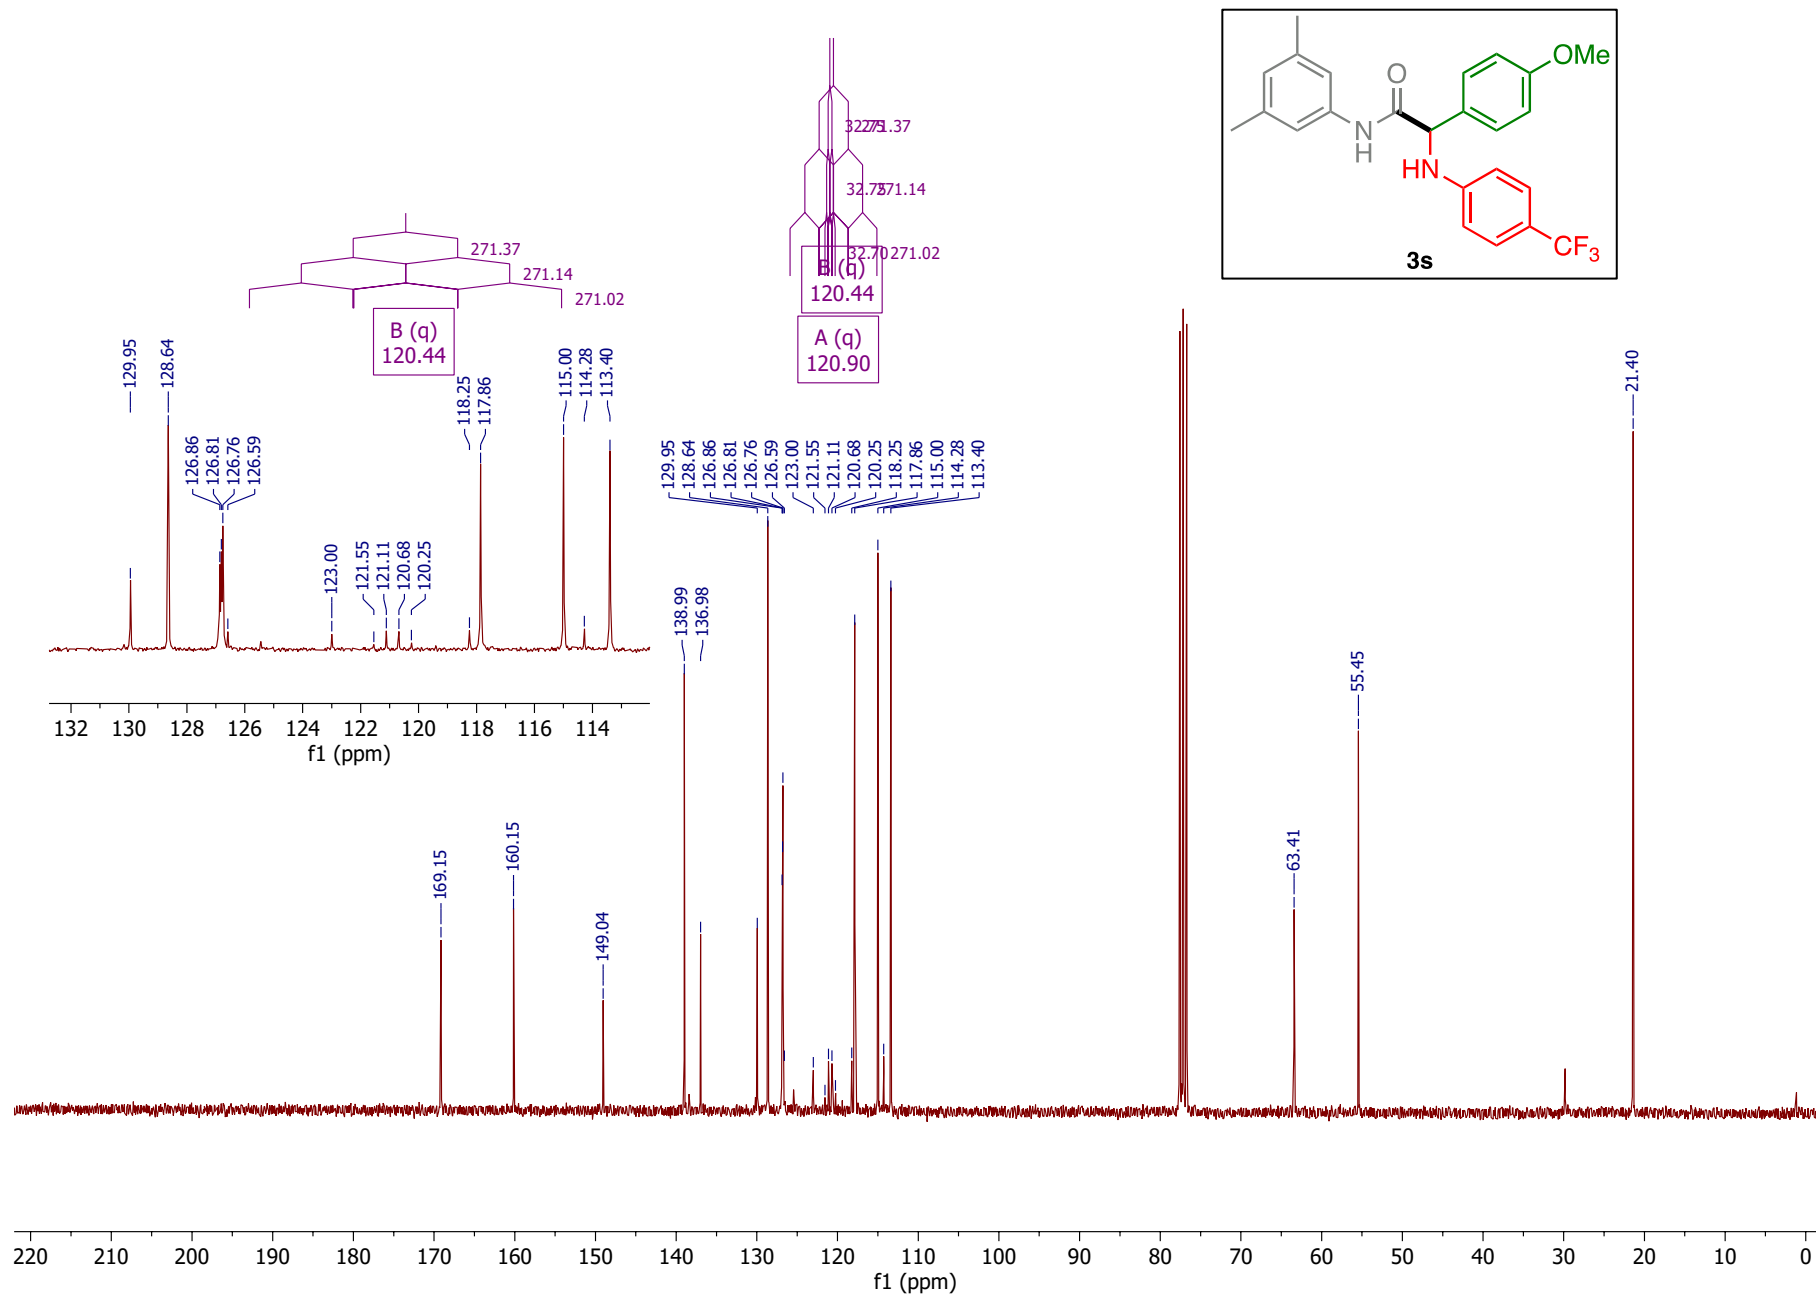

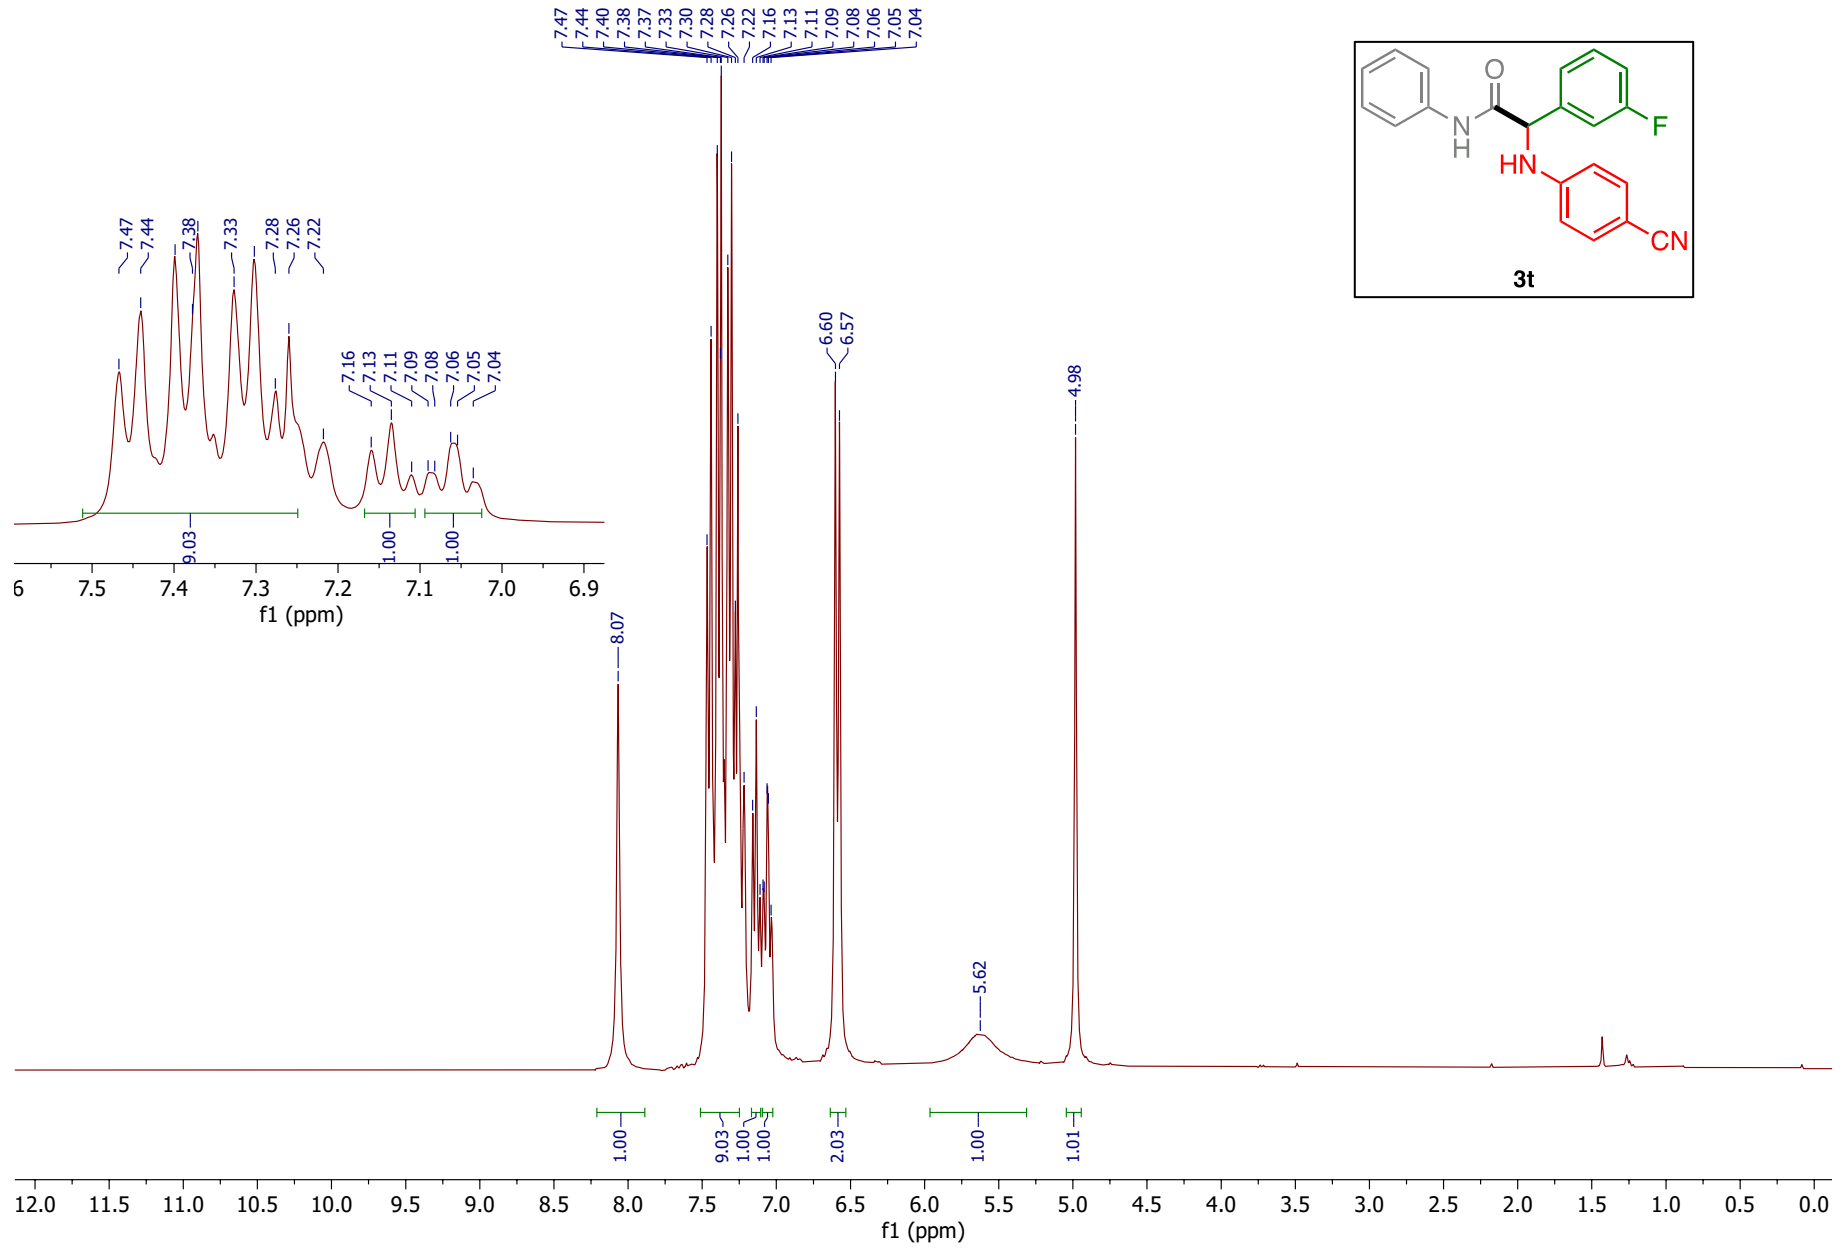

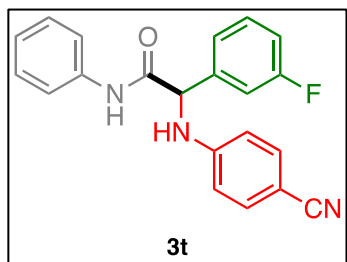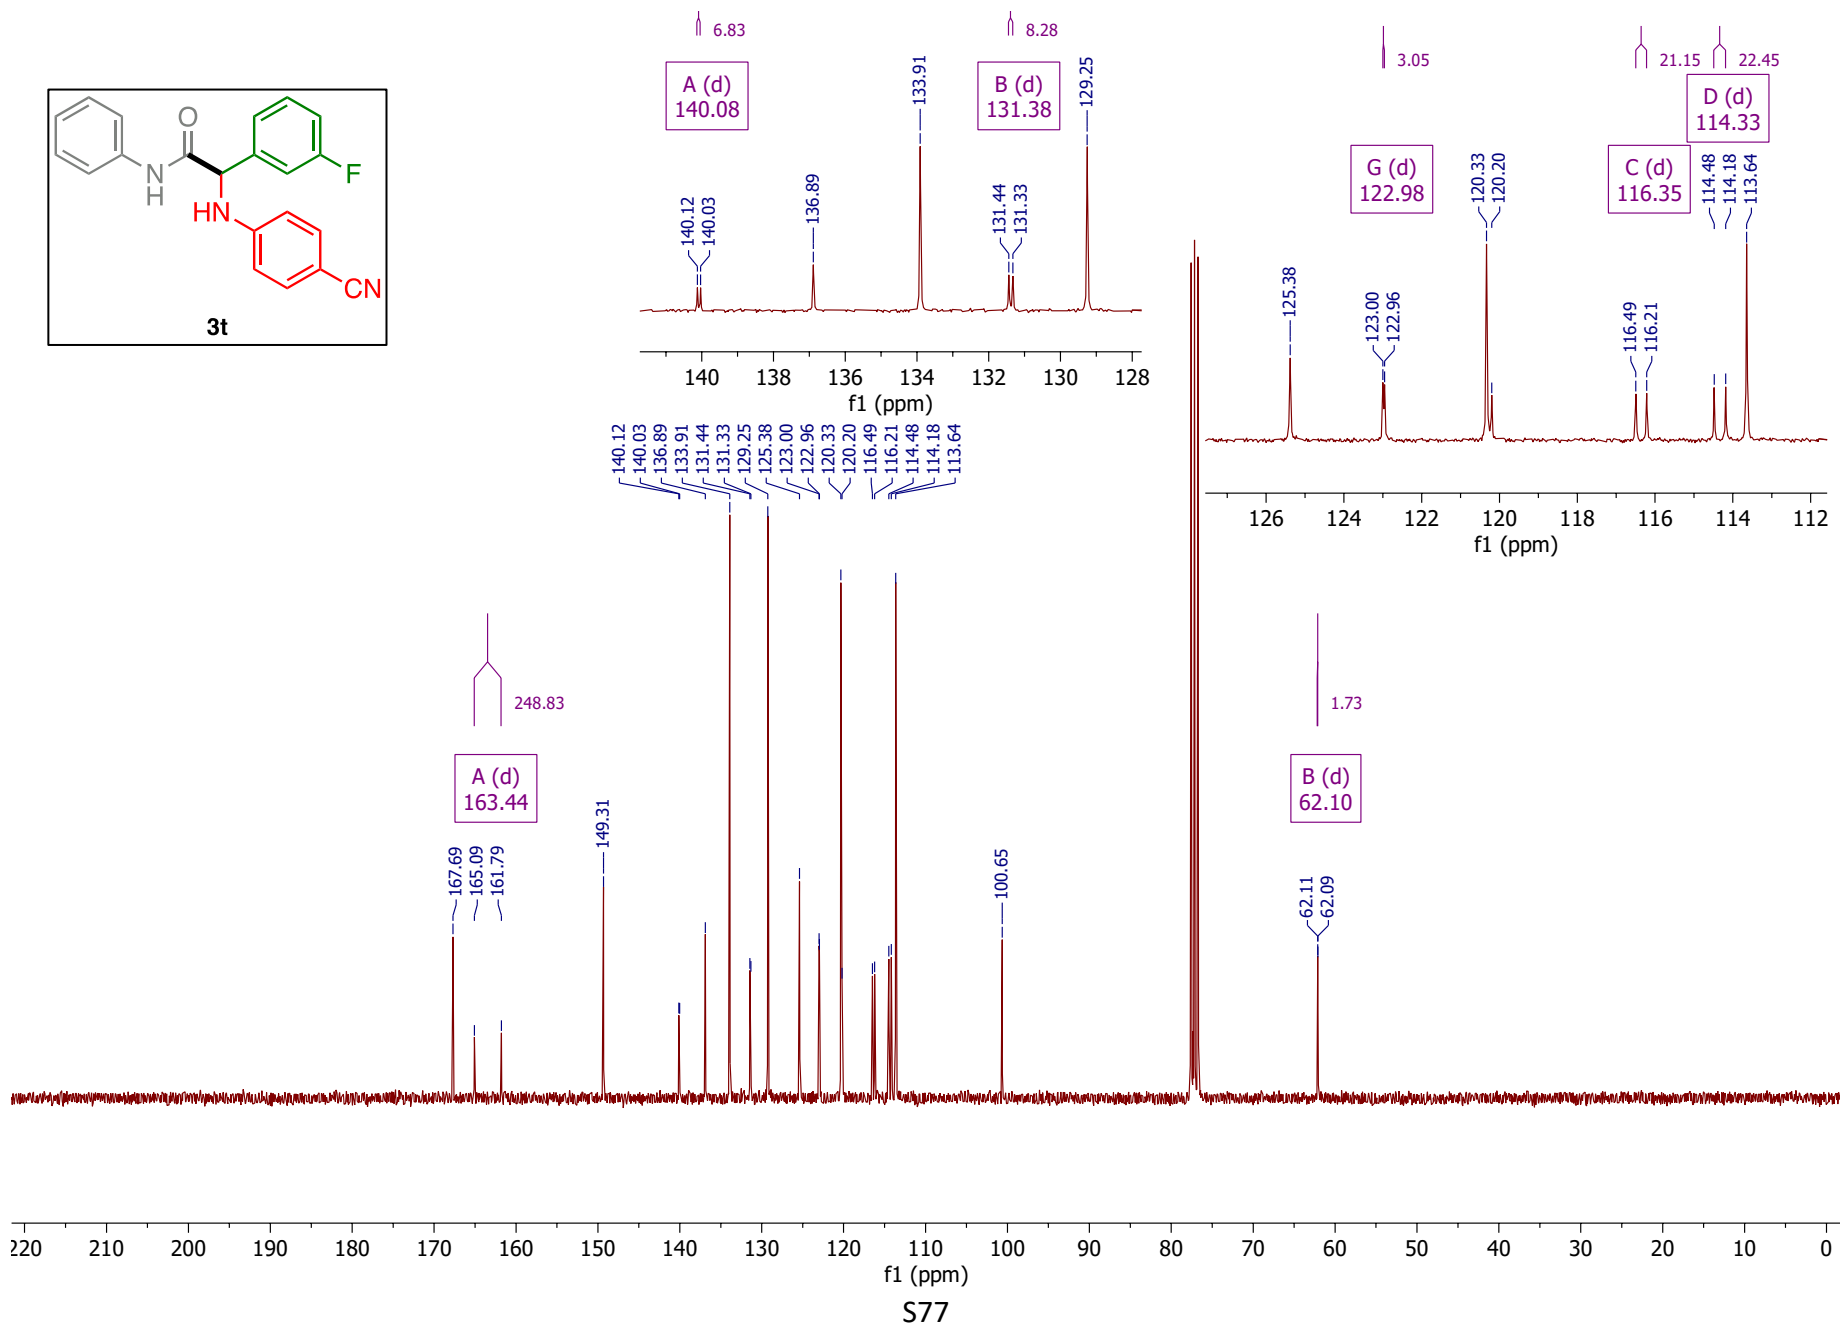

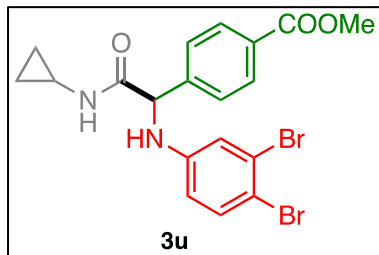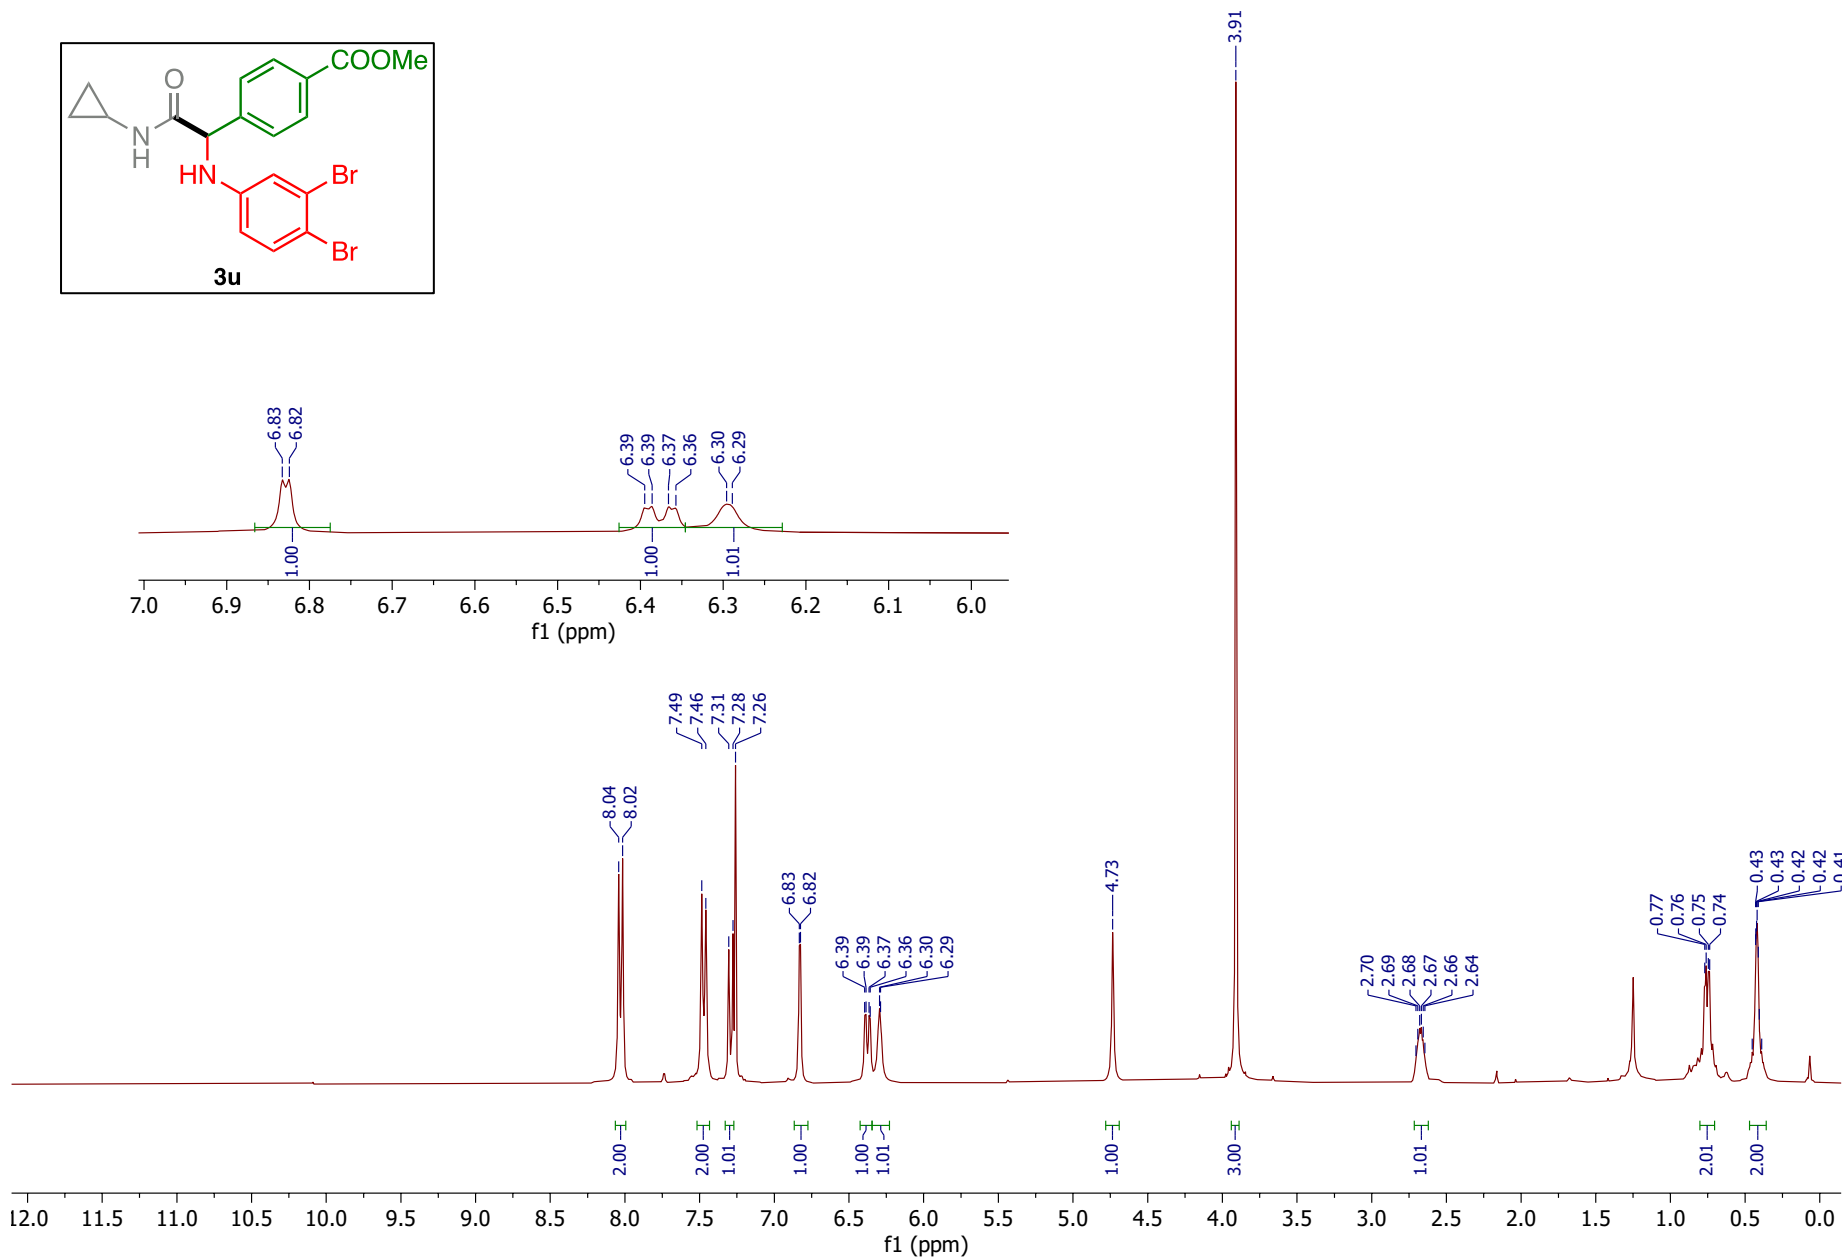

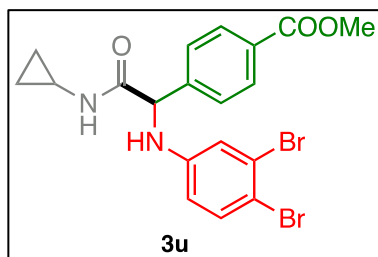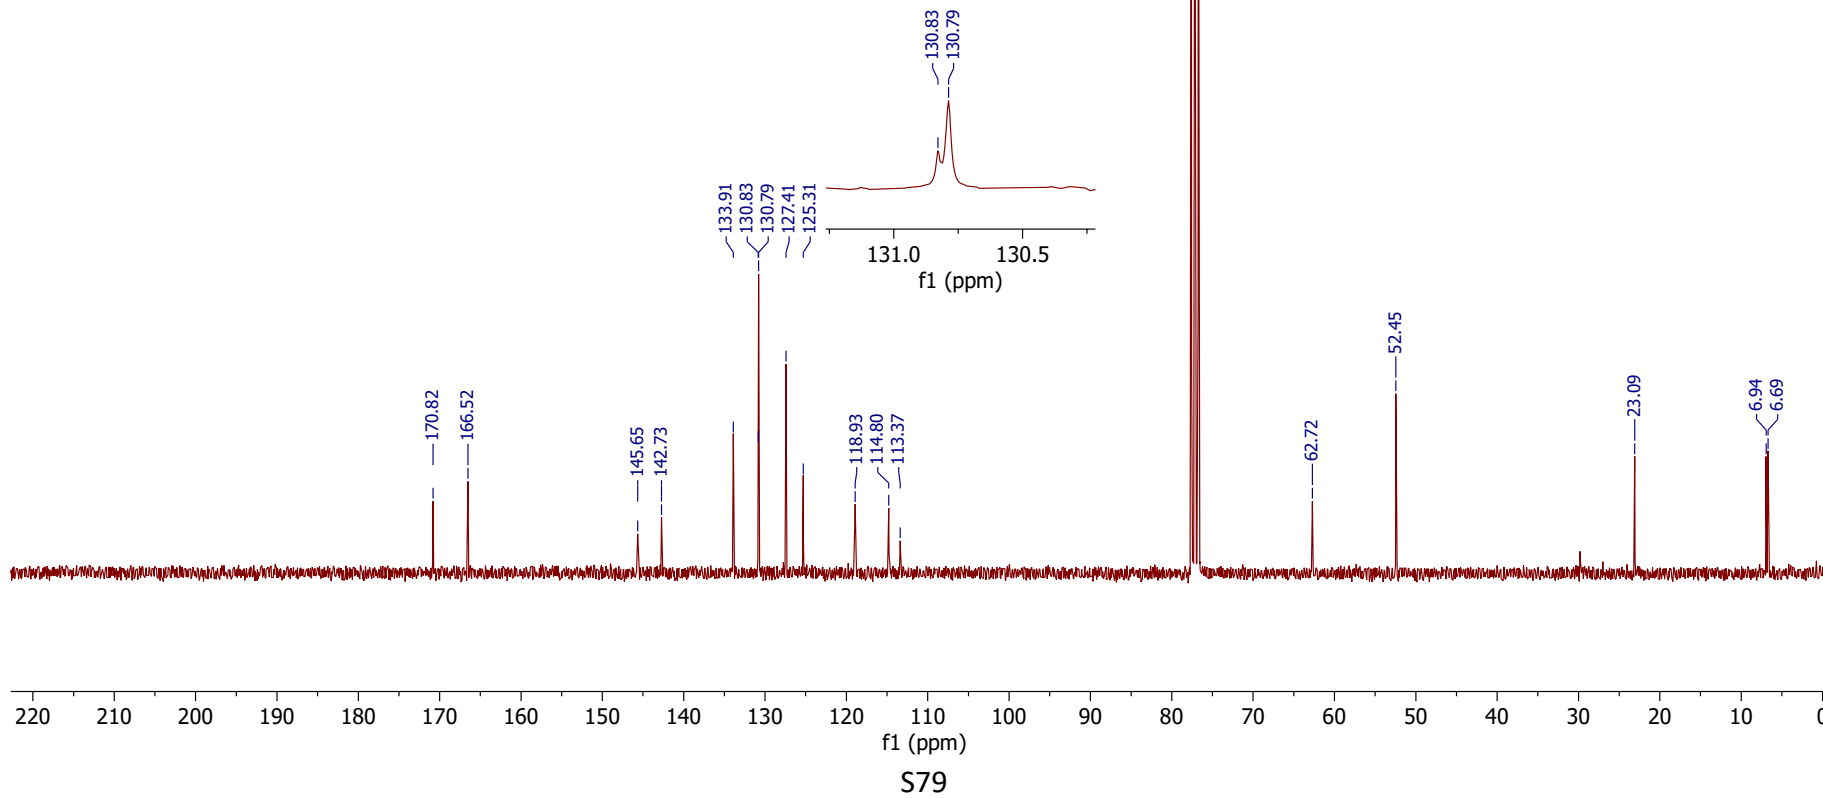



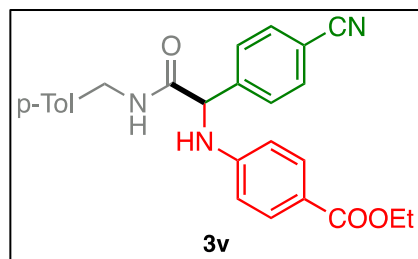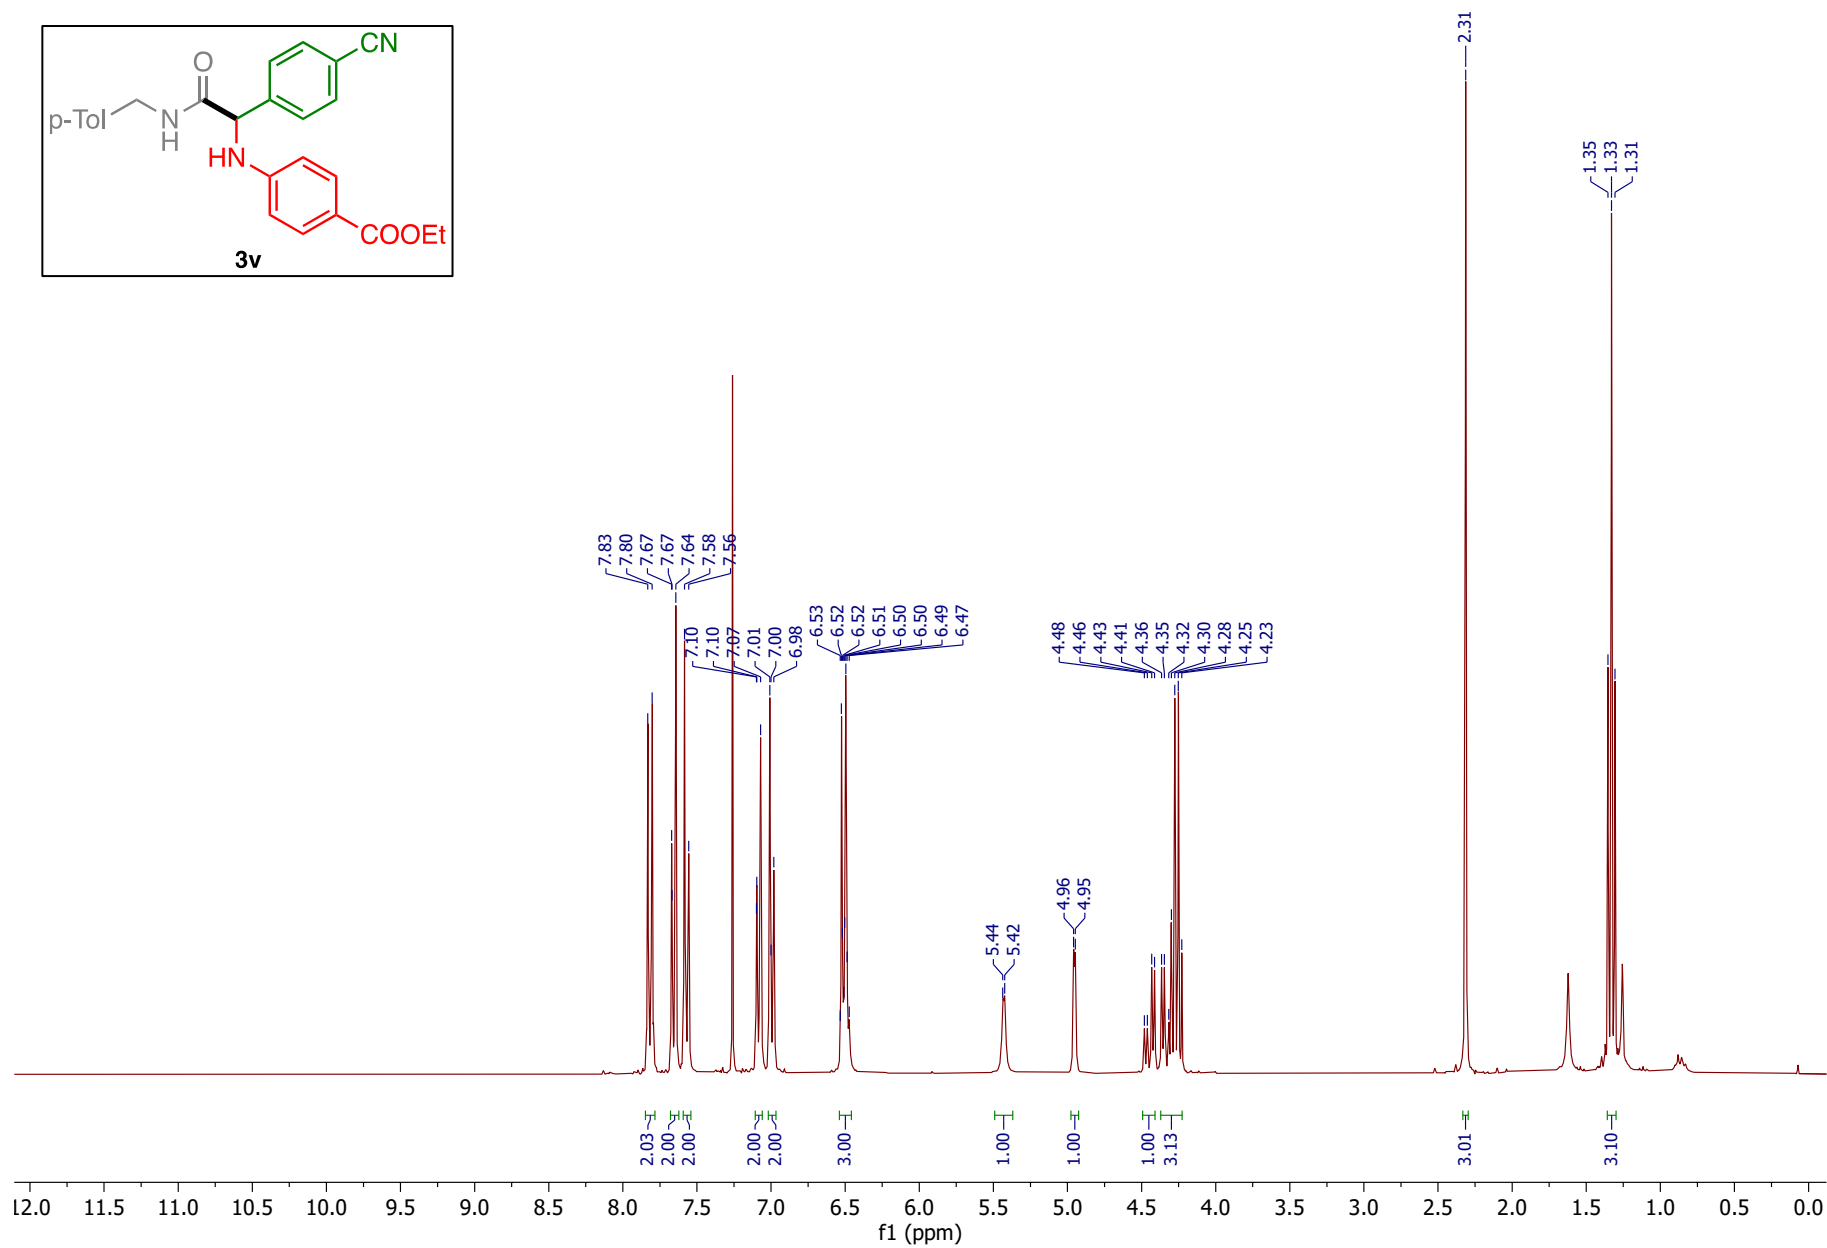

S80

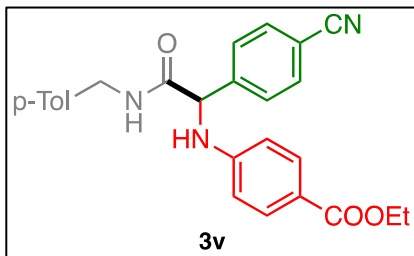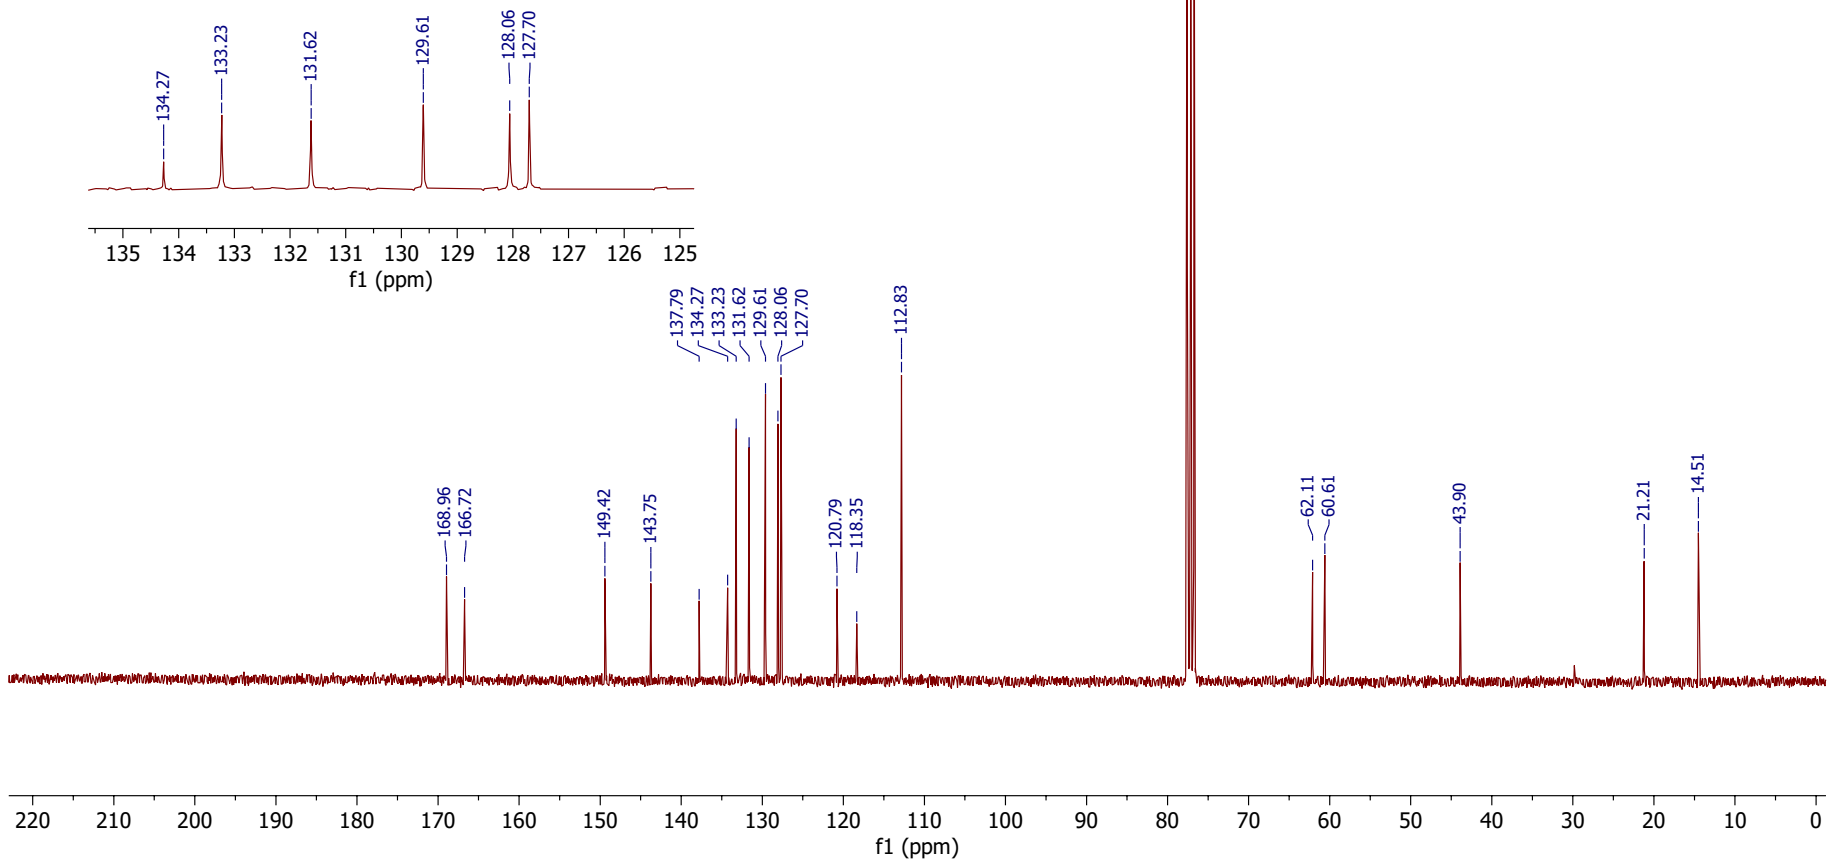

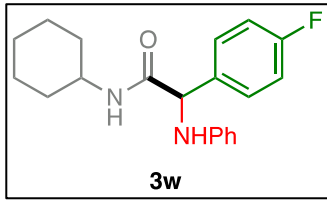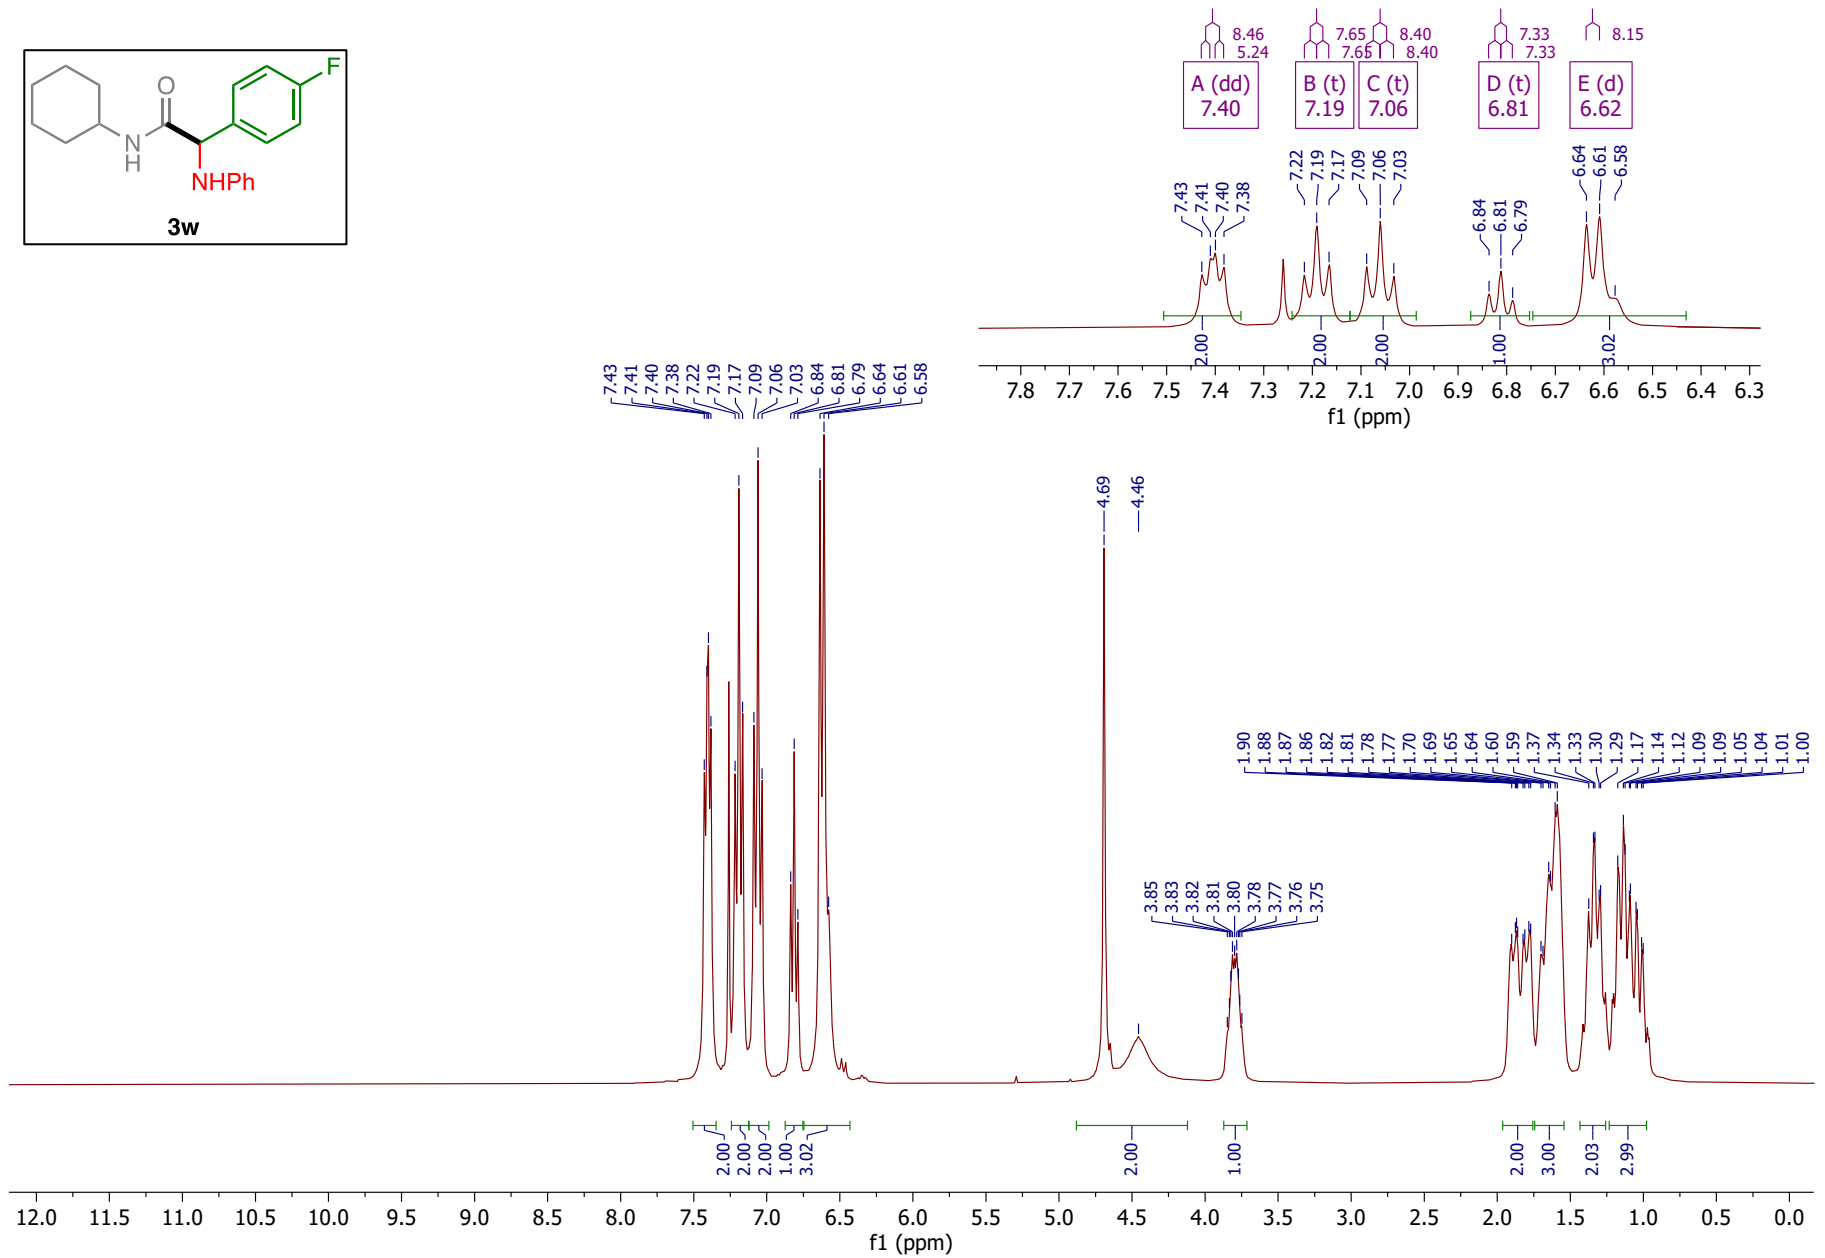

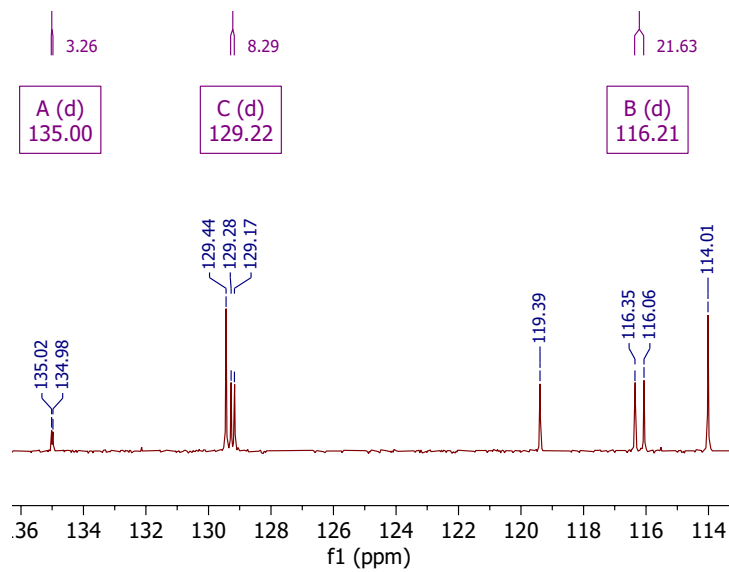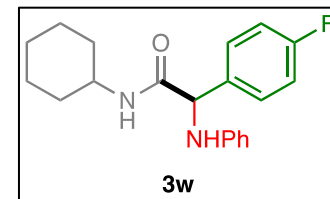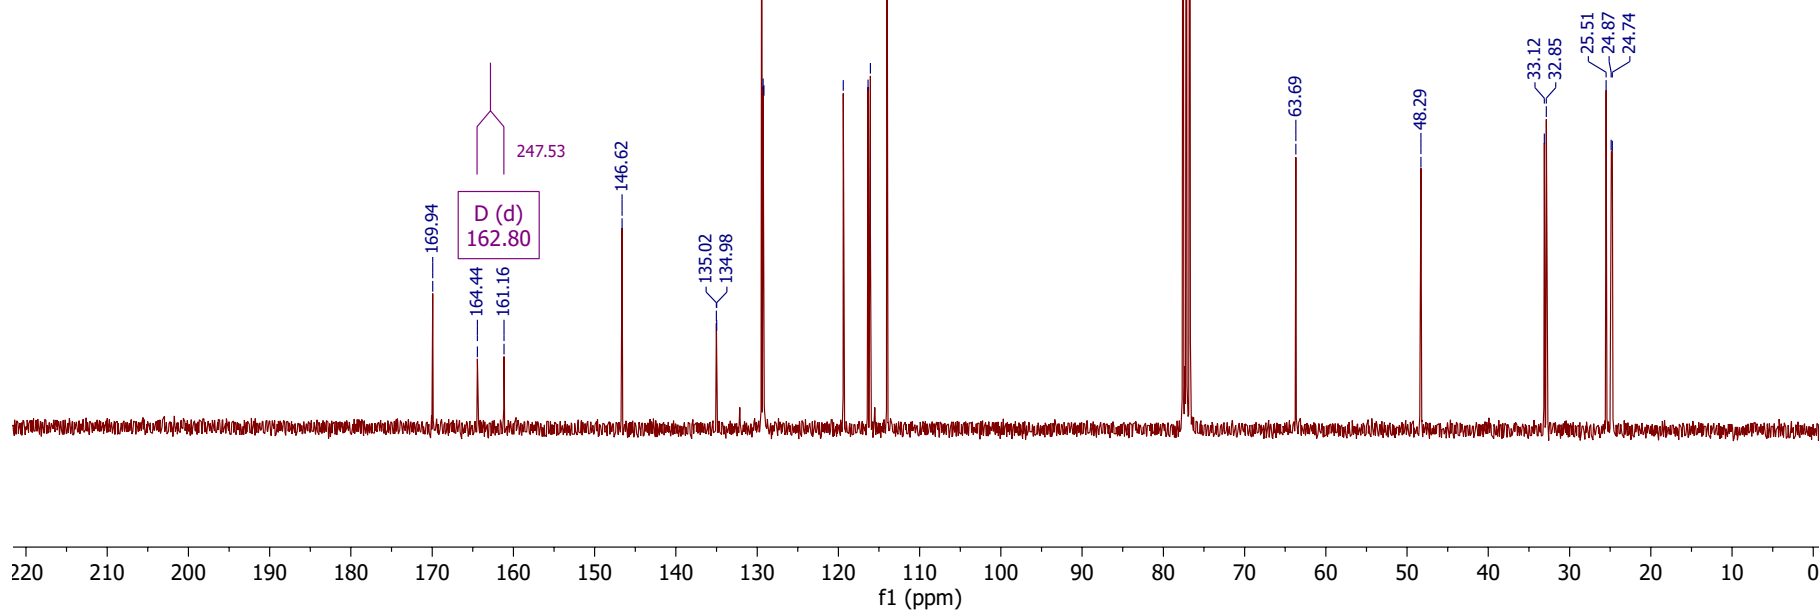

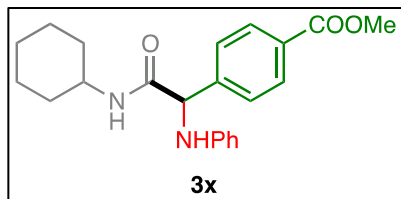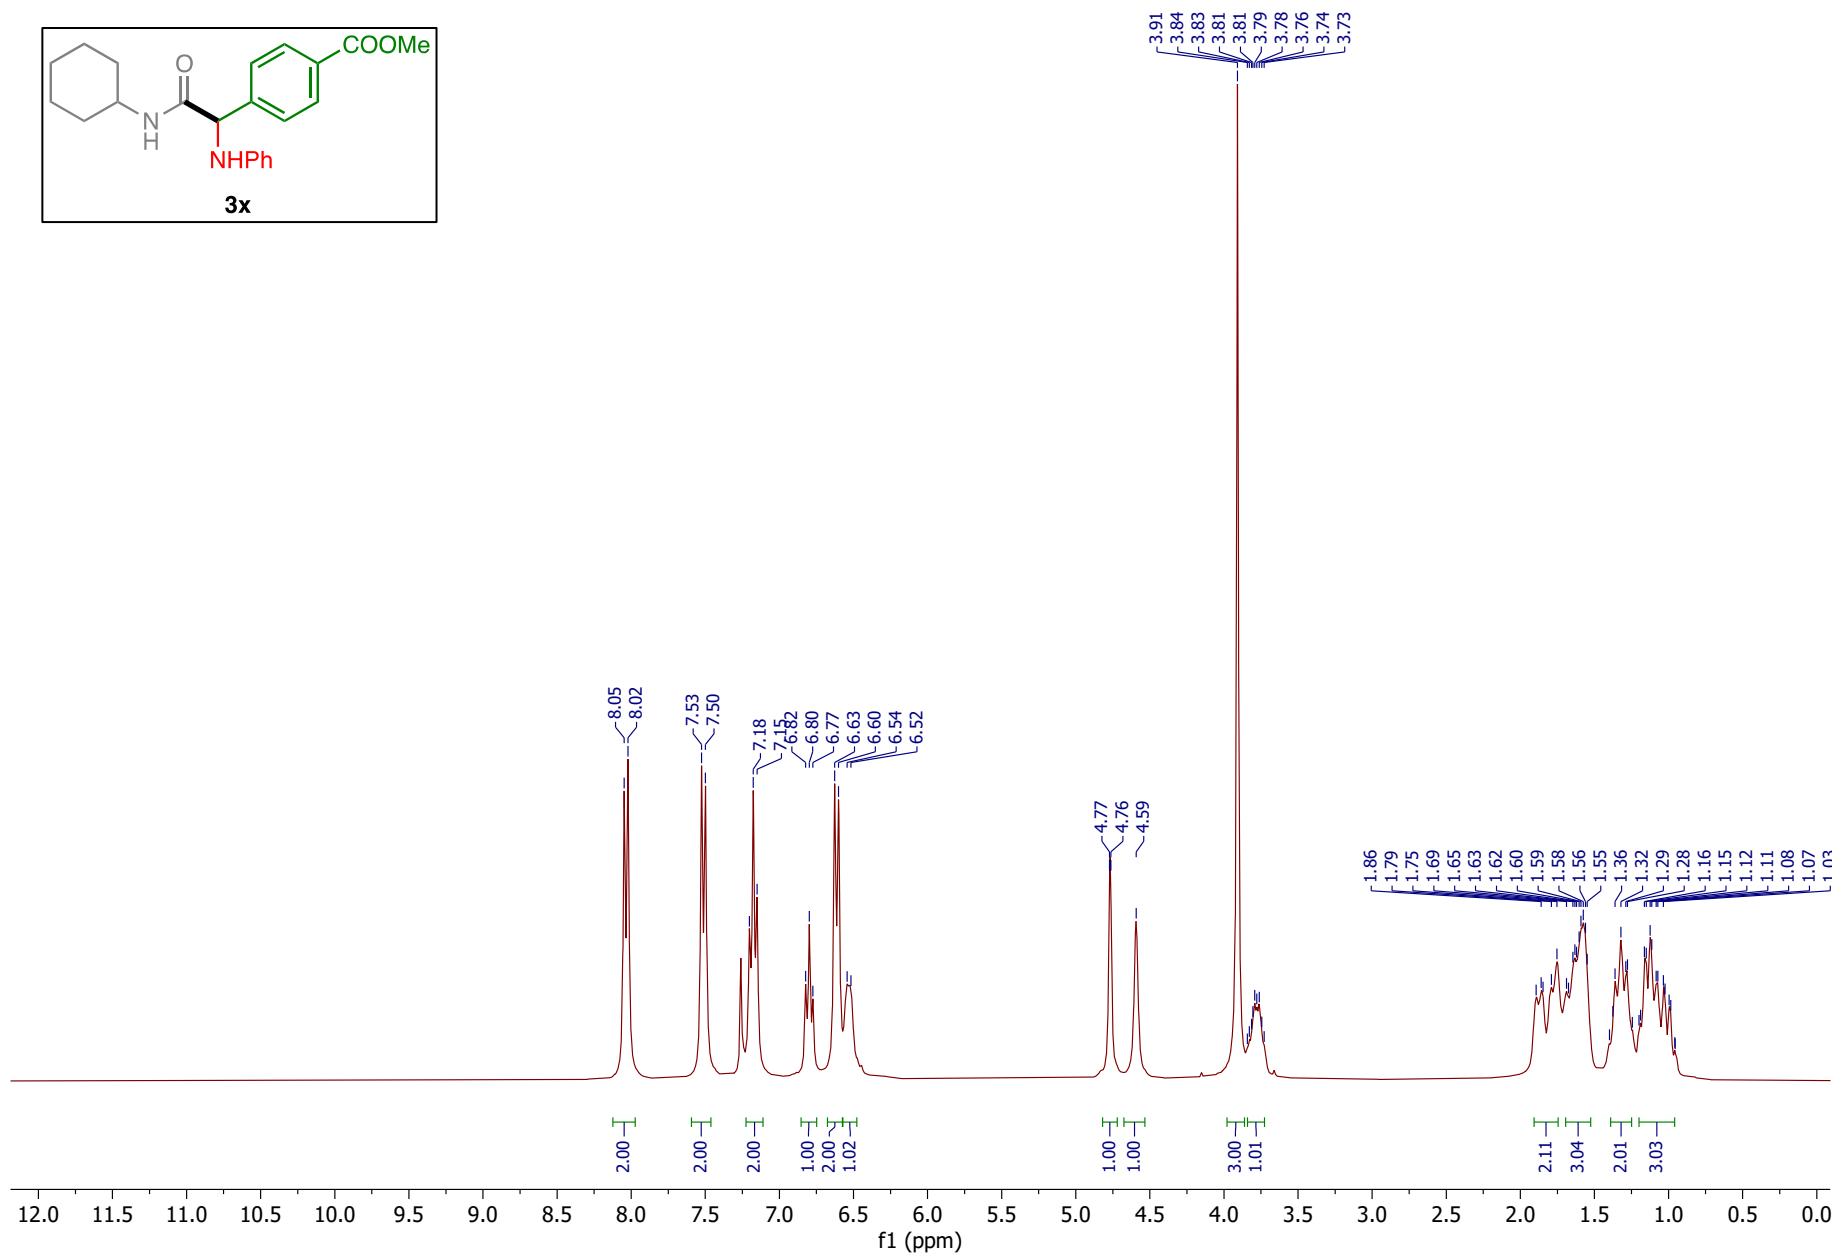

S84

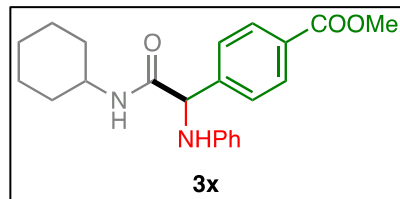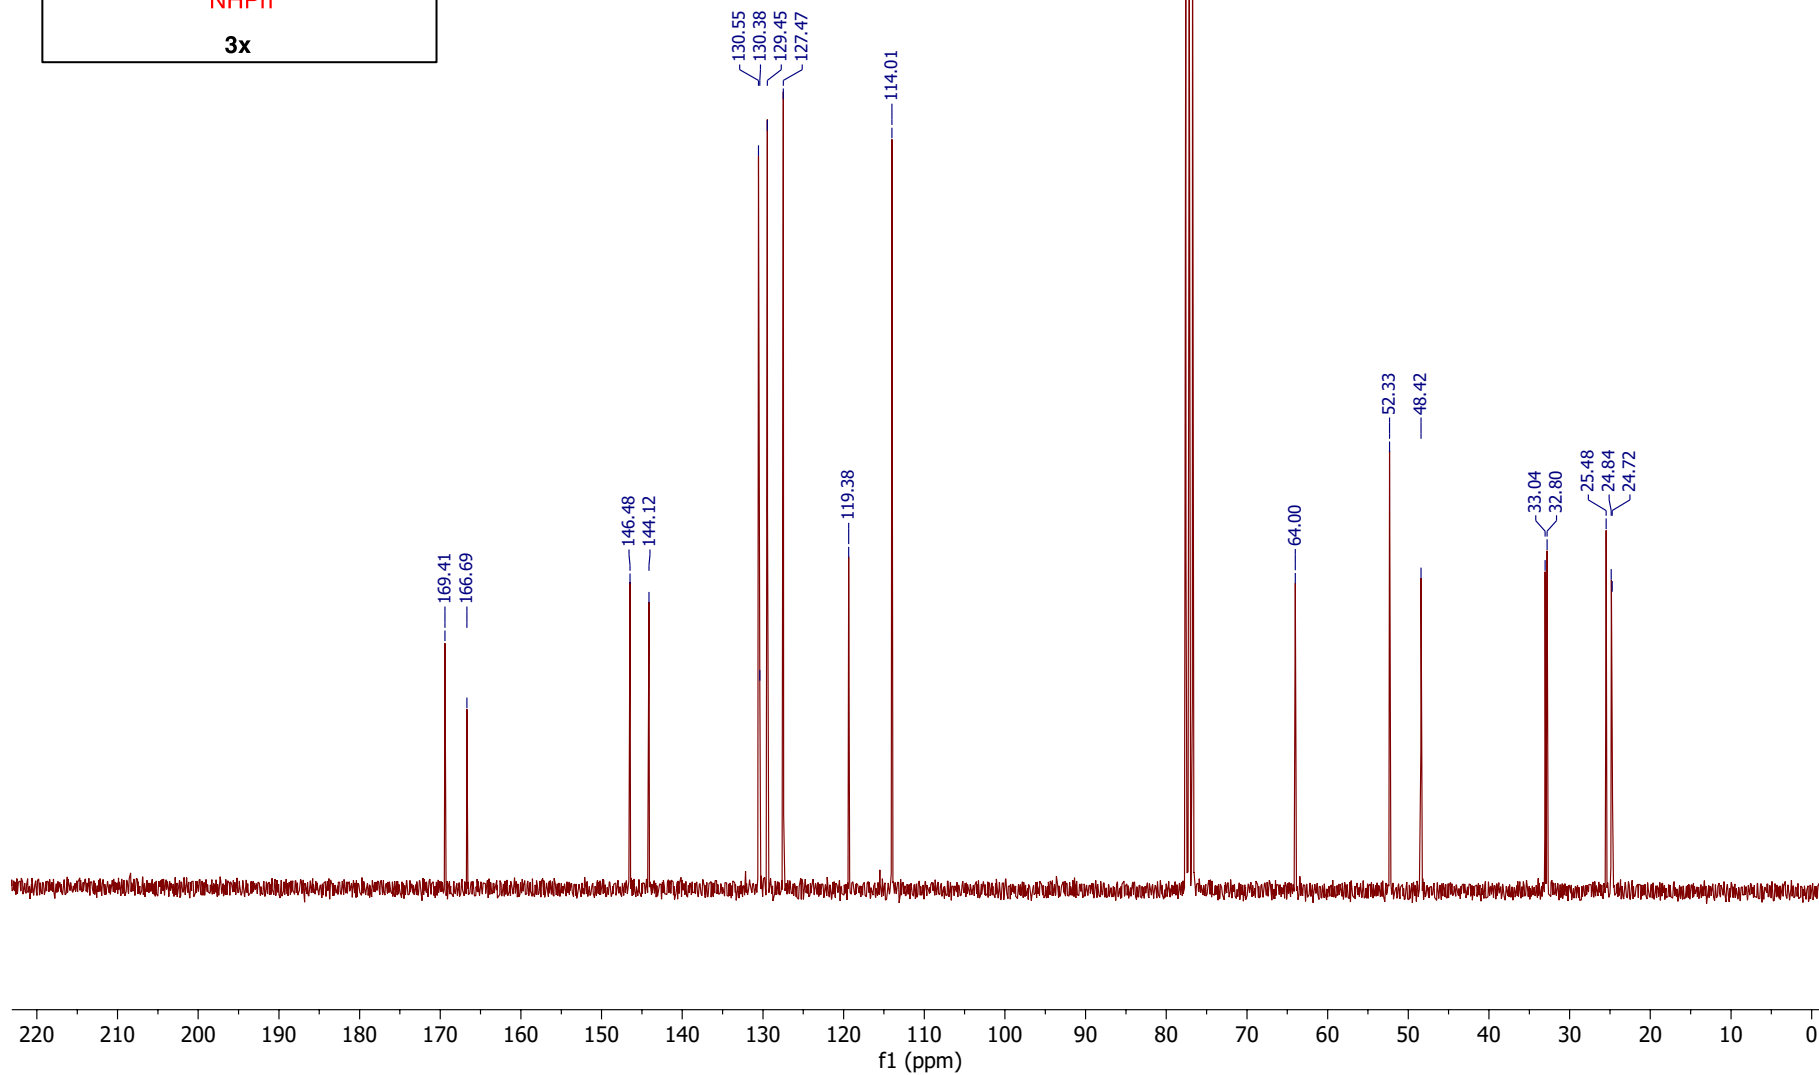

S85

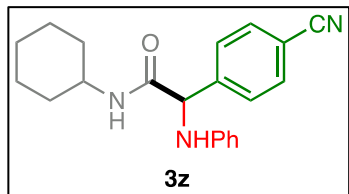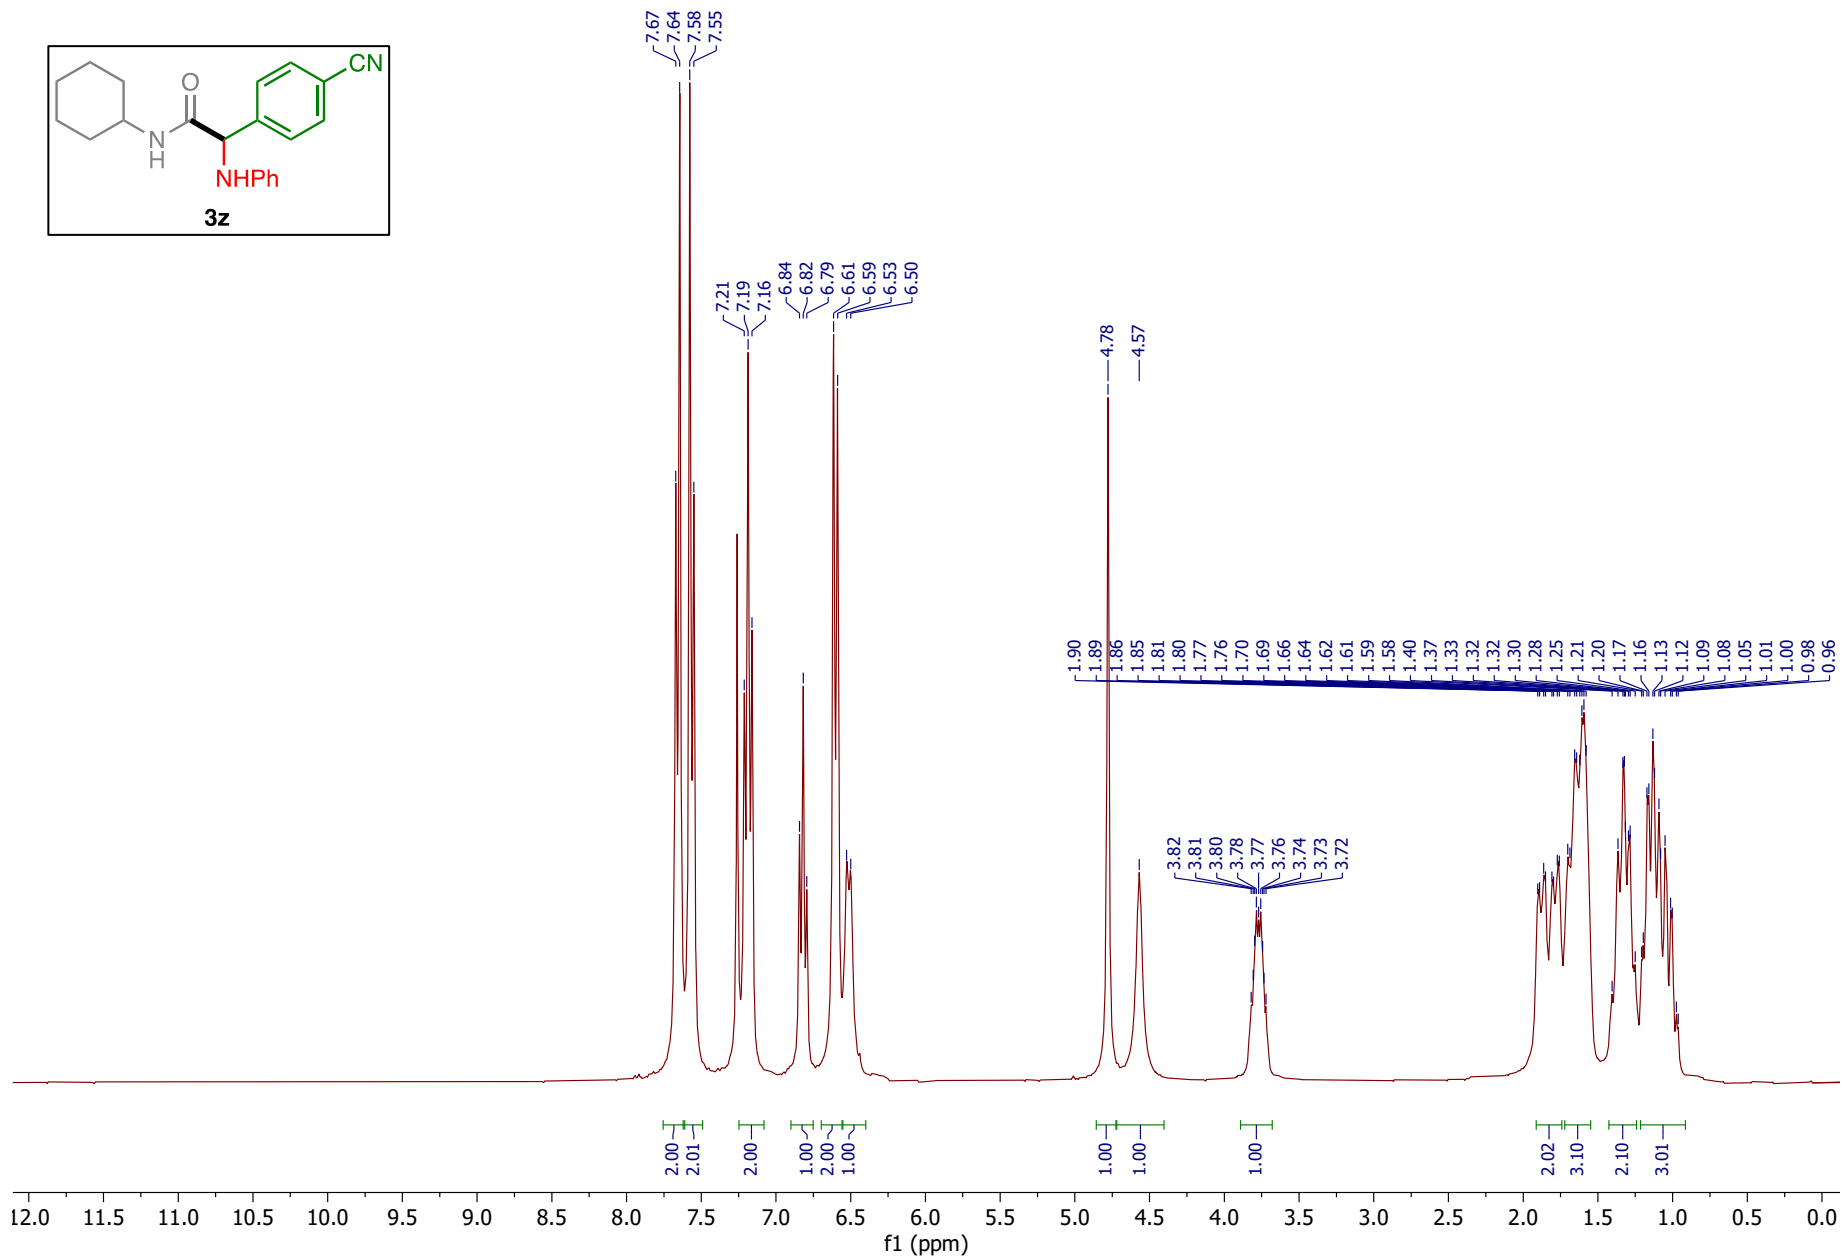

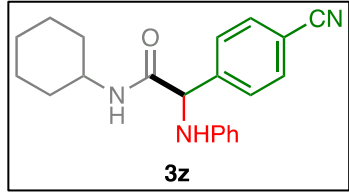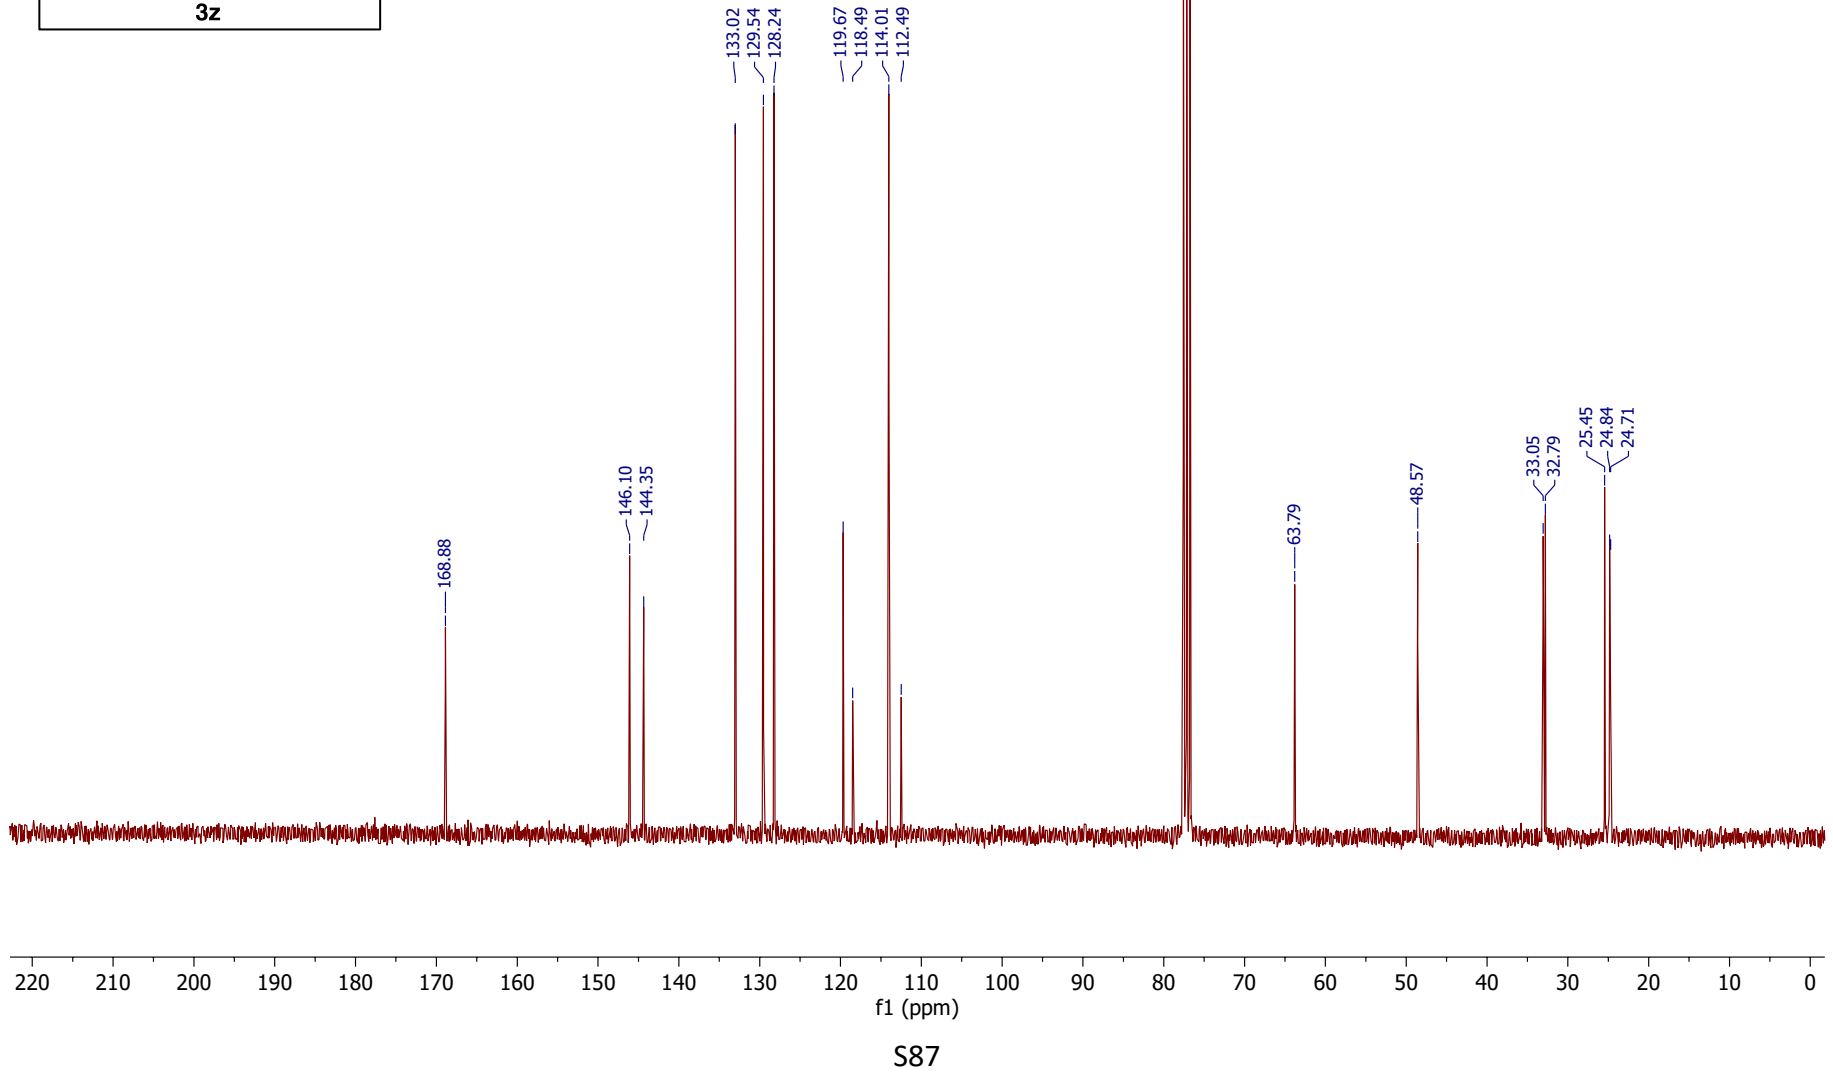



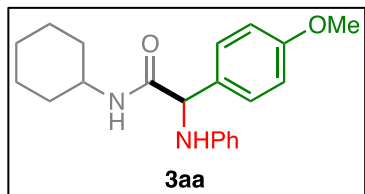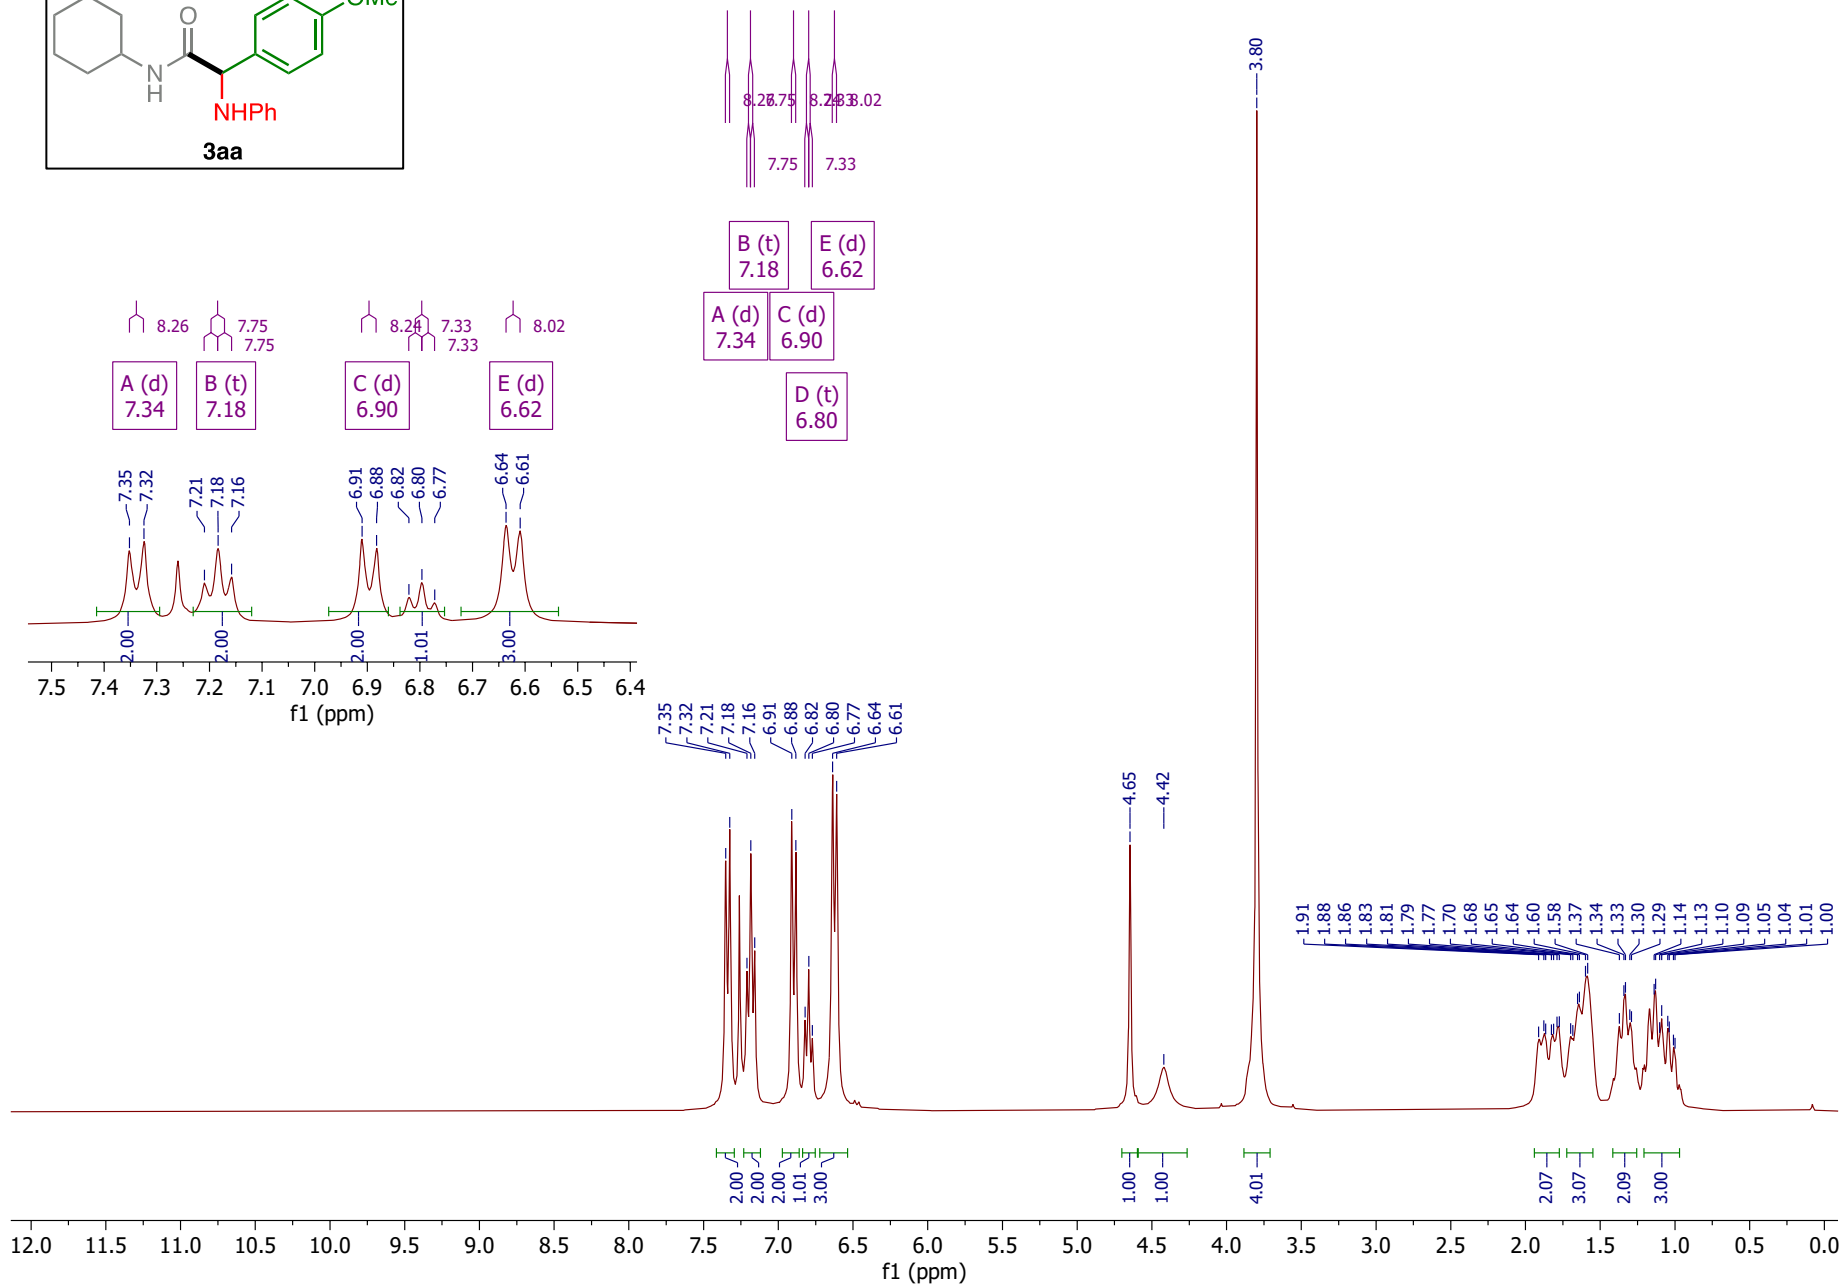

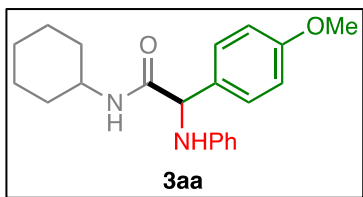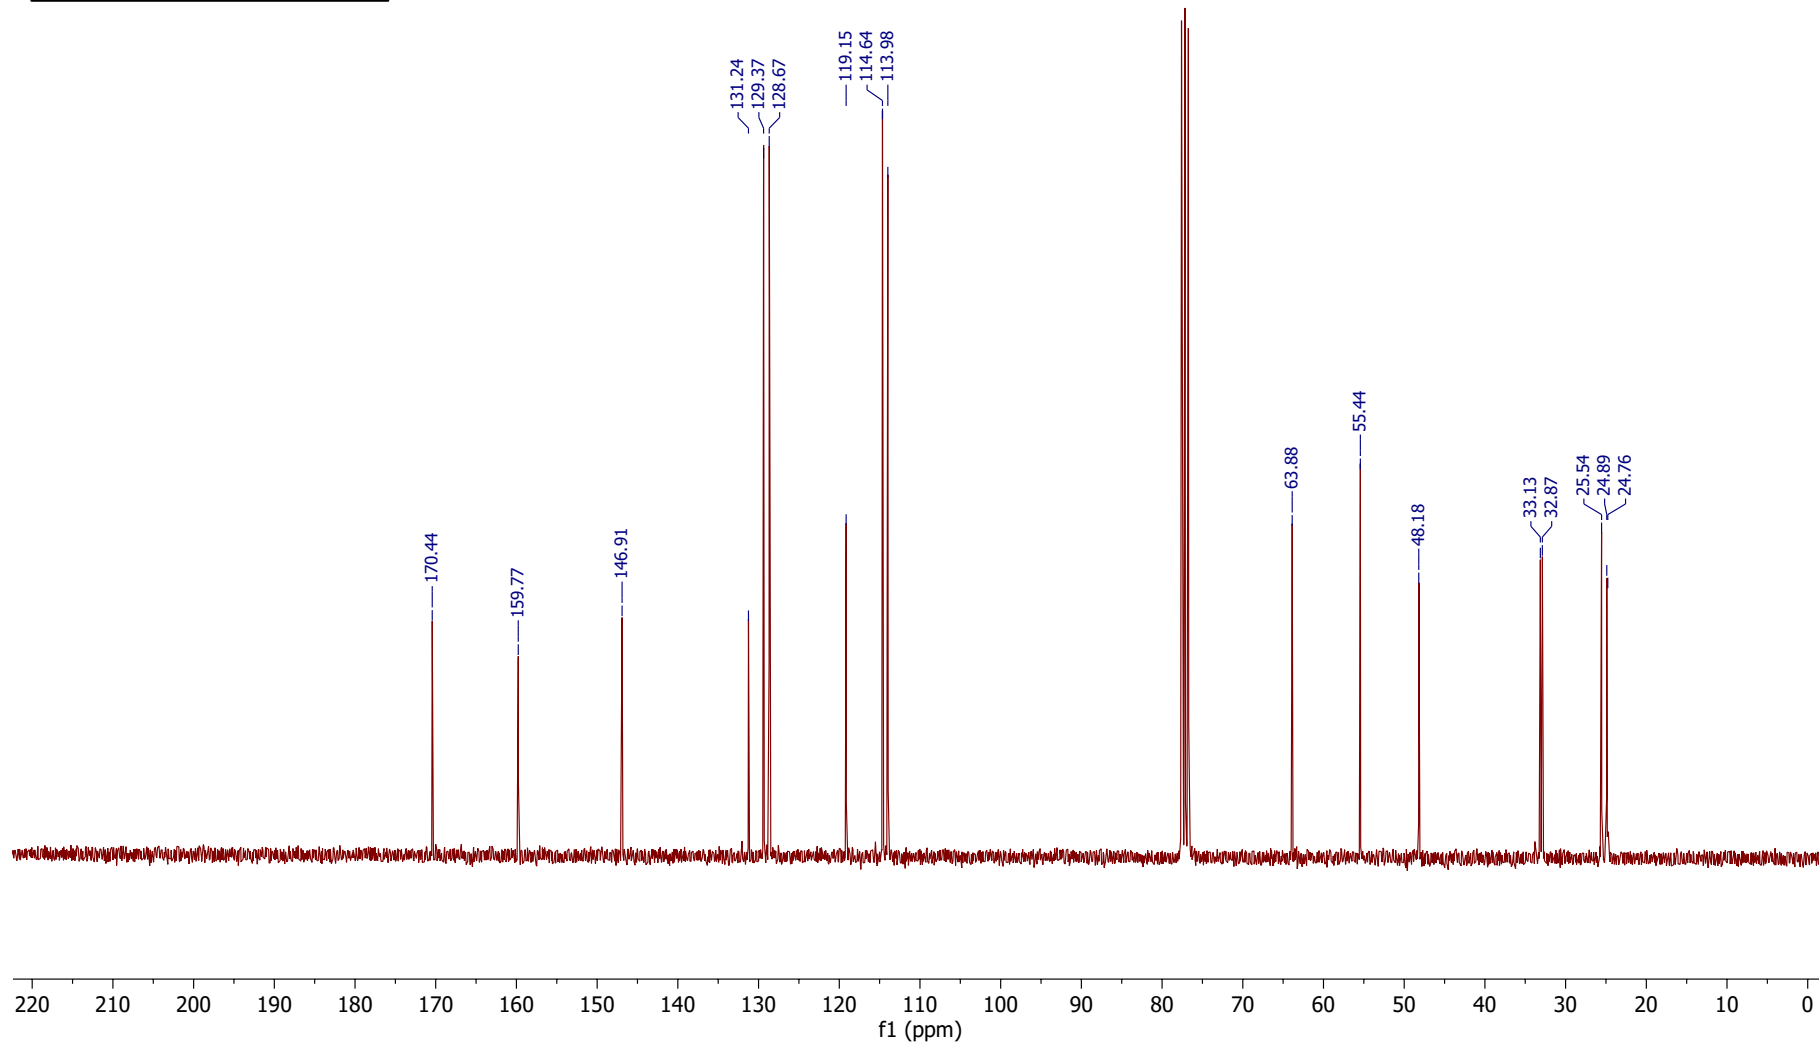

S89

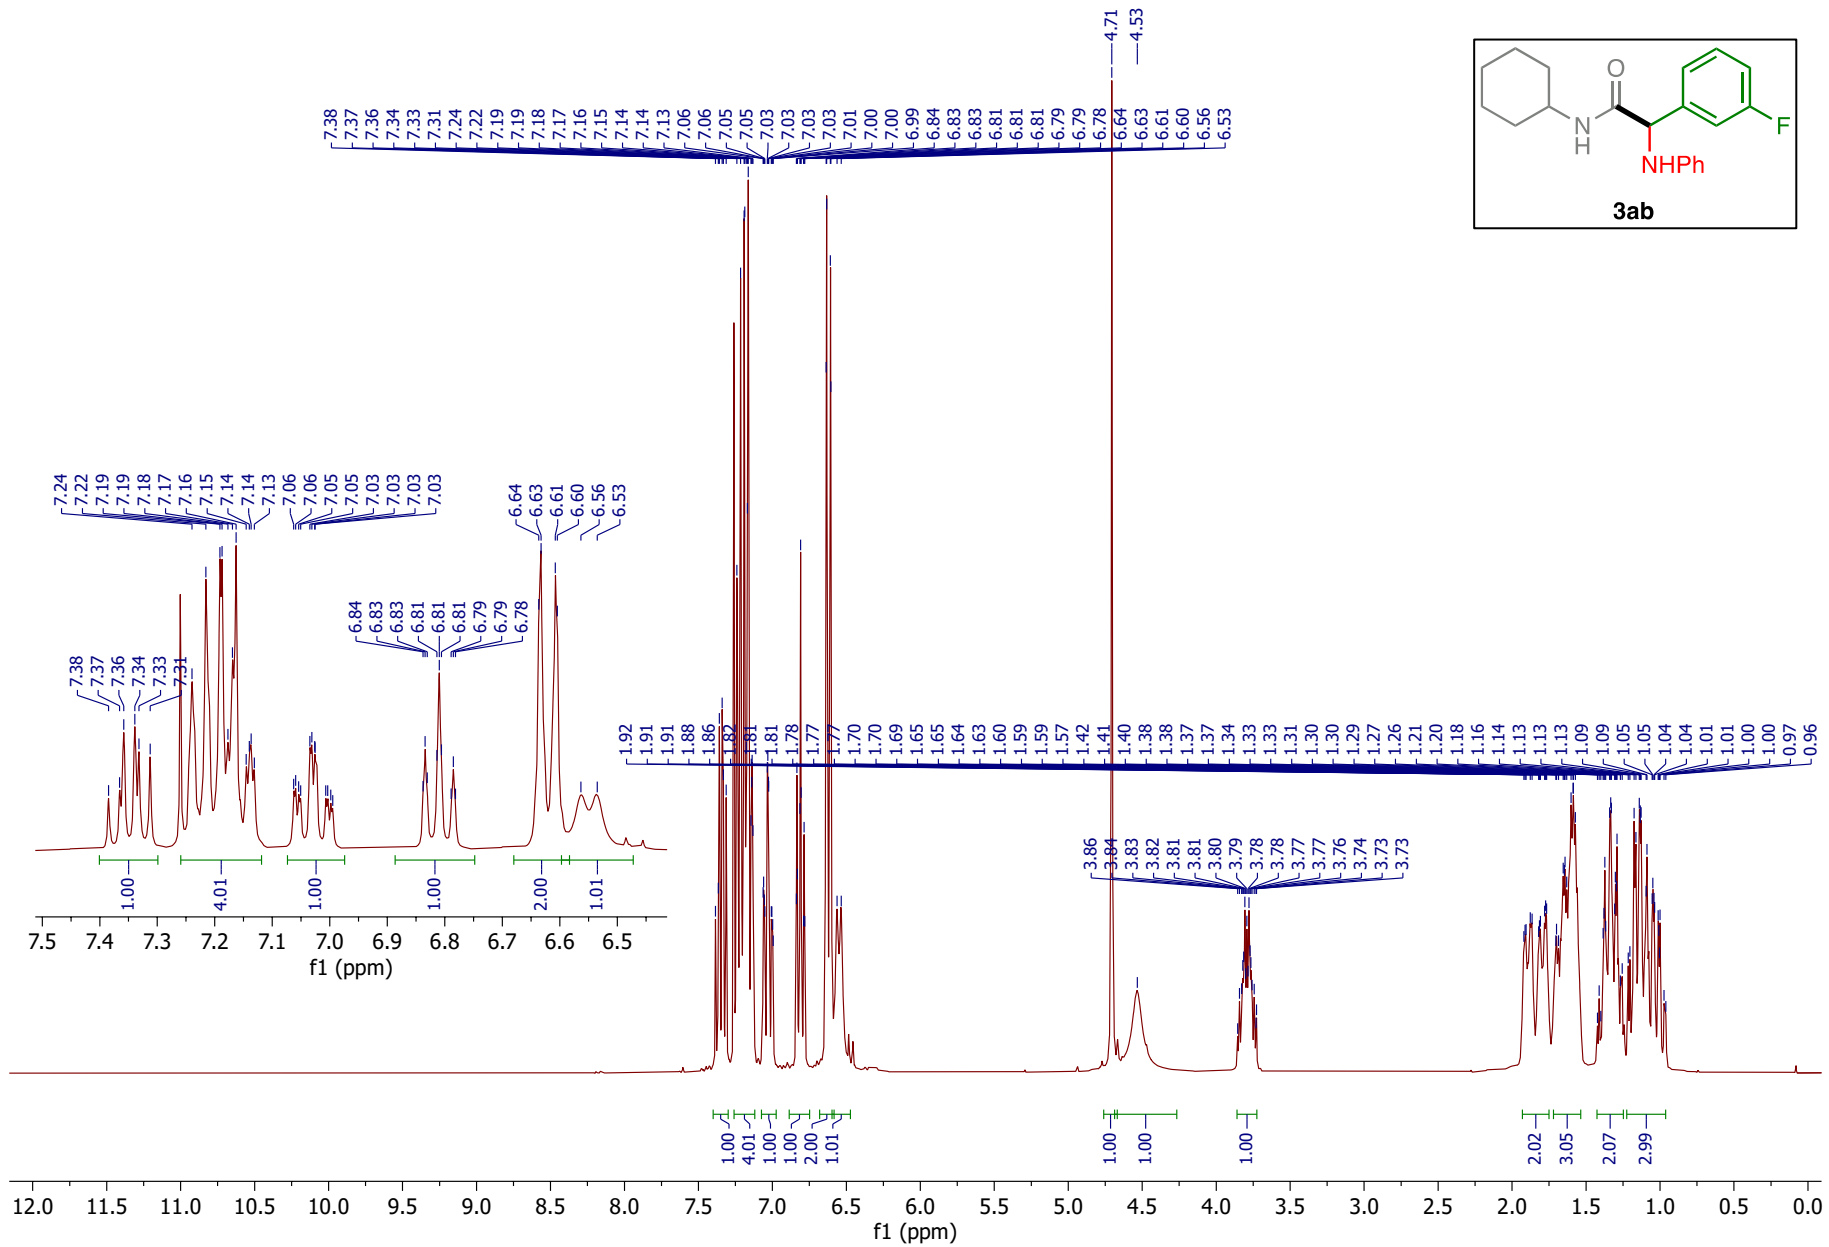

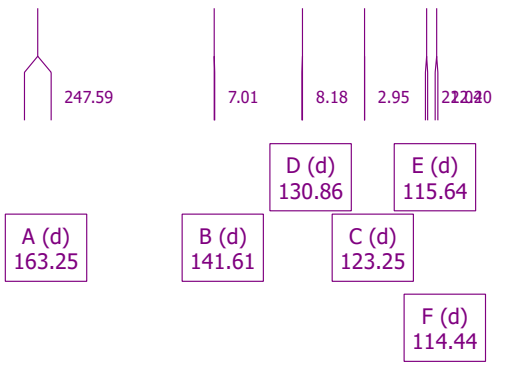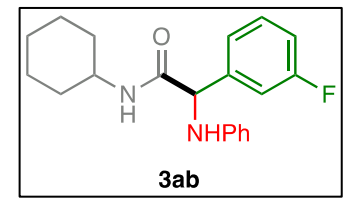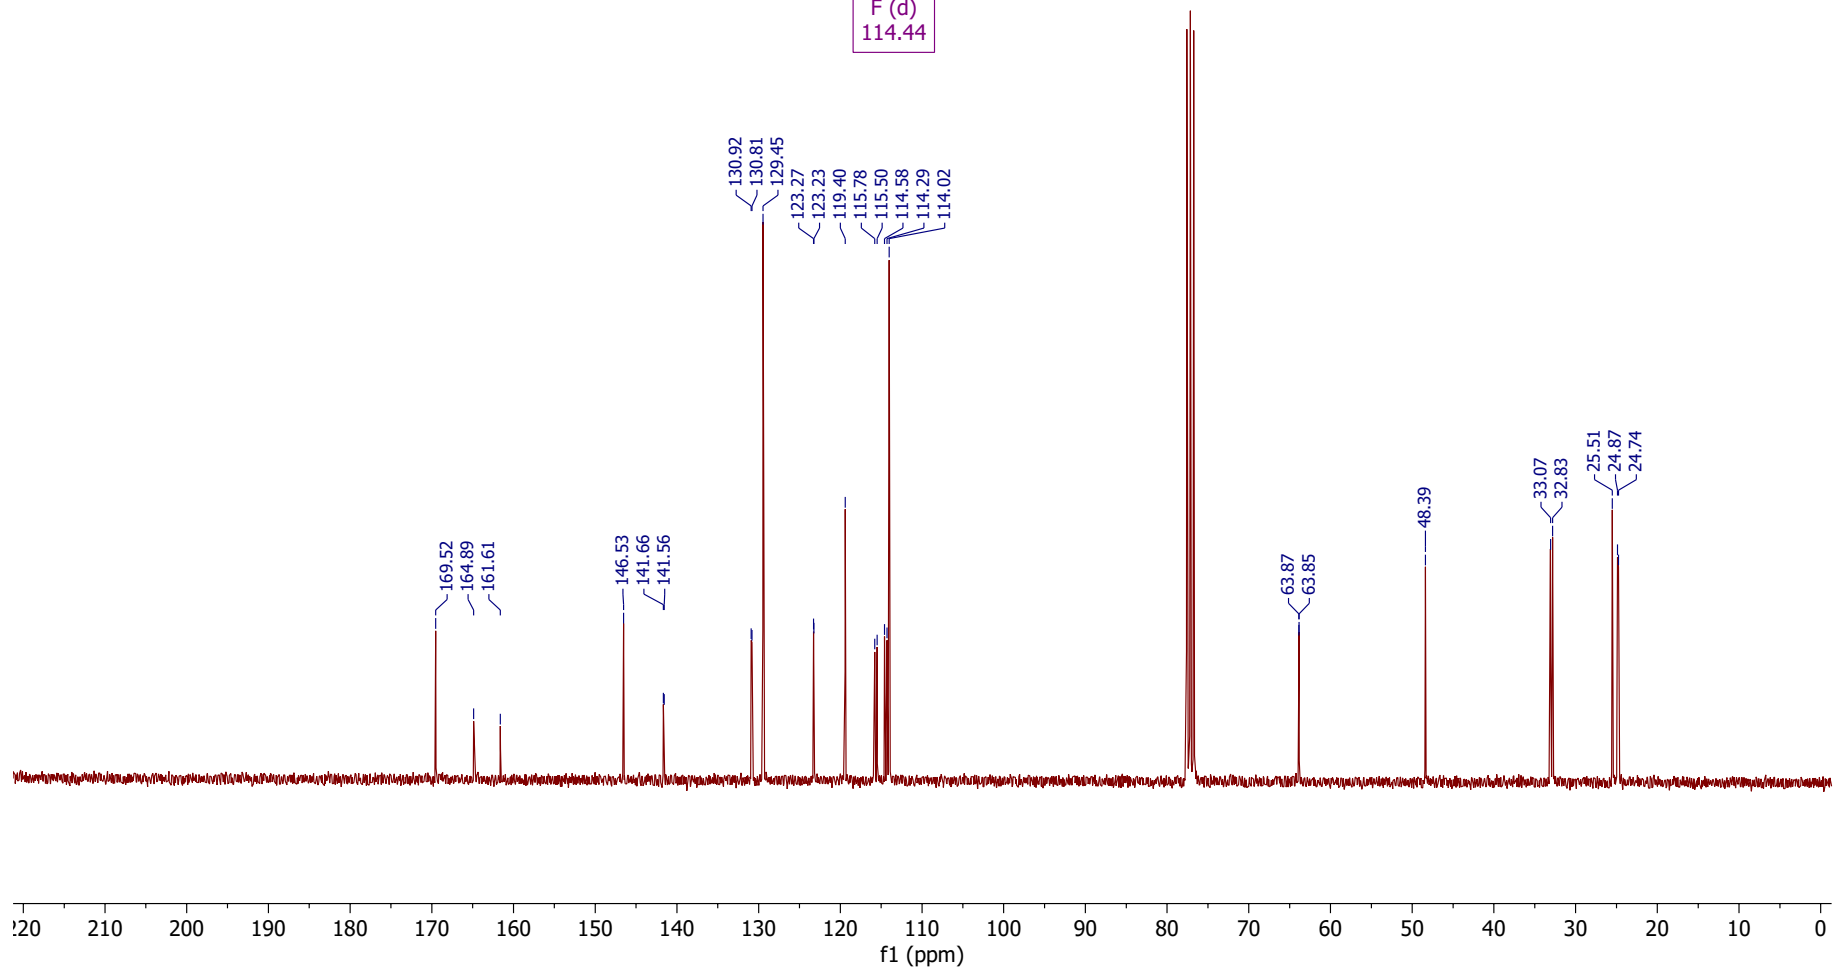

S91

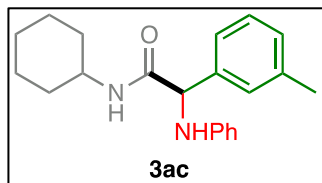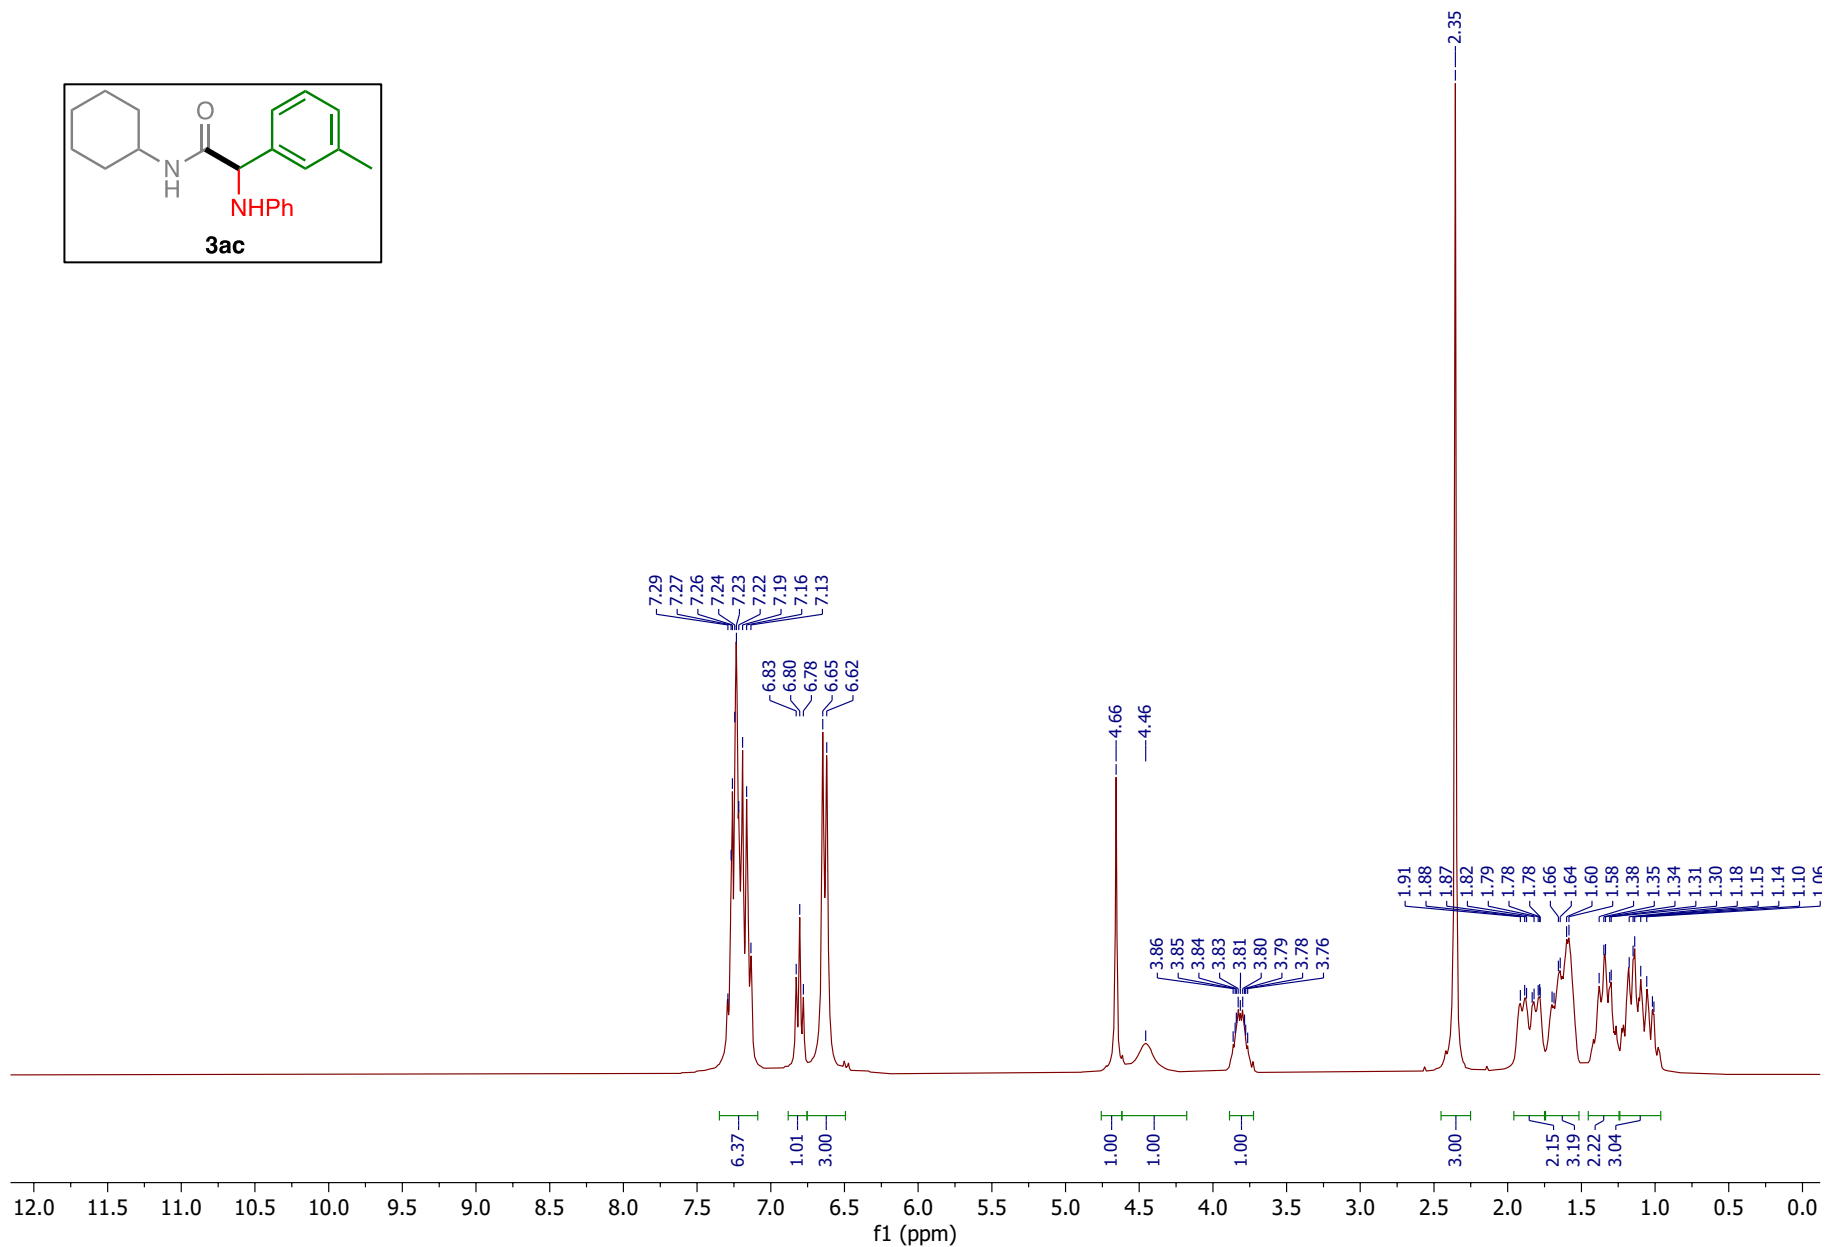

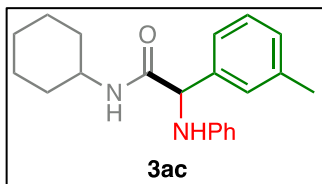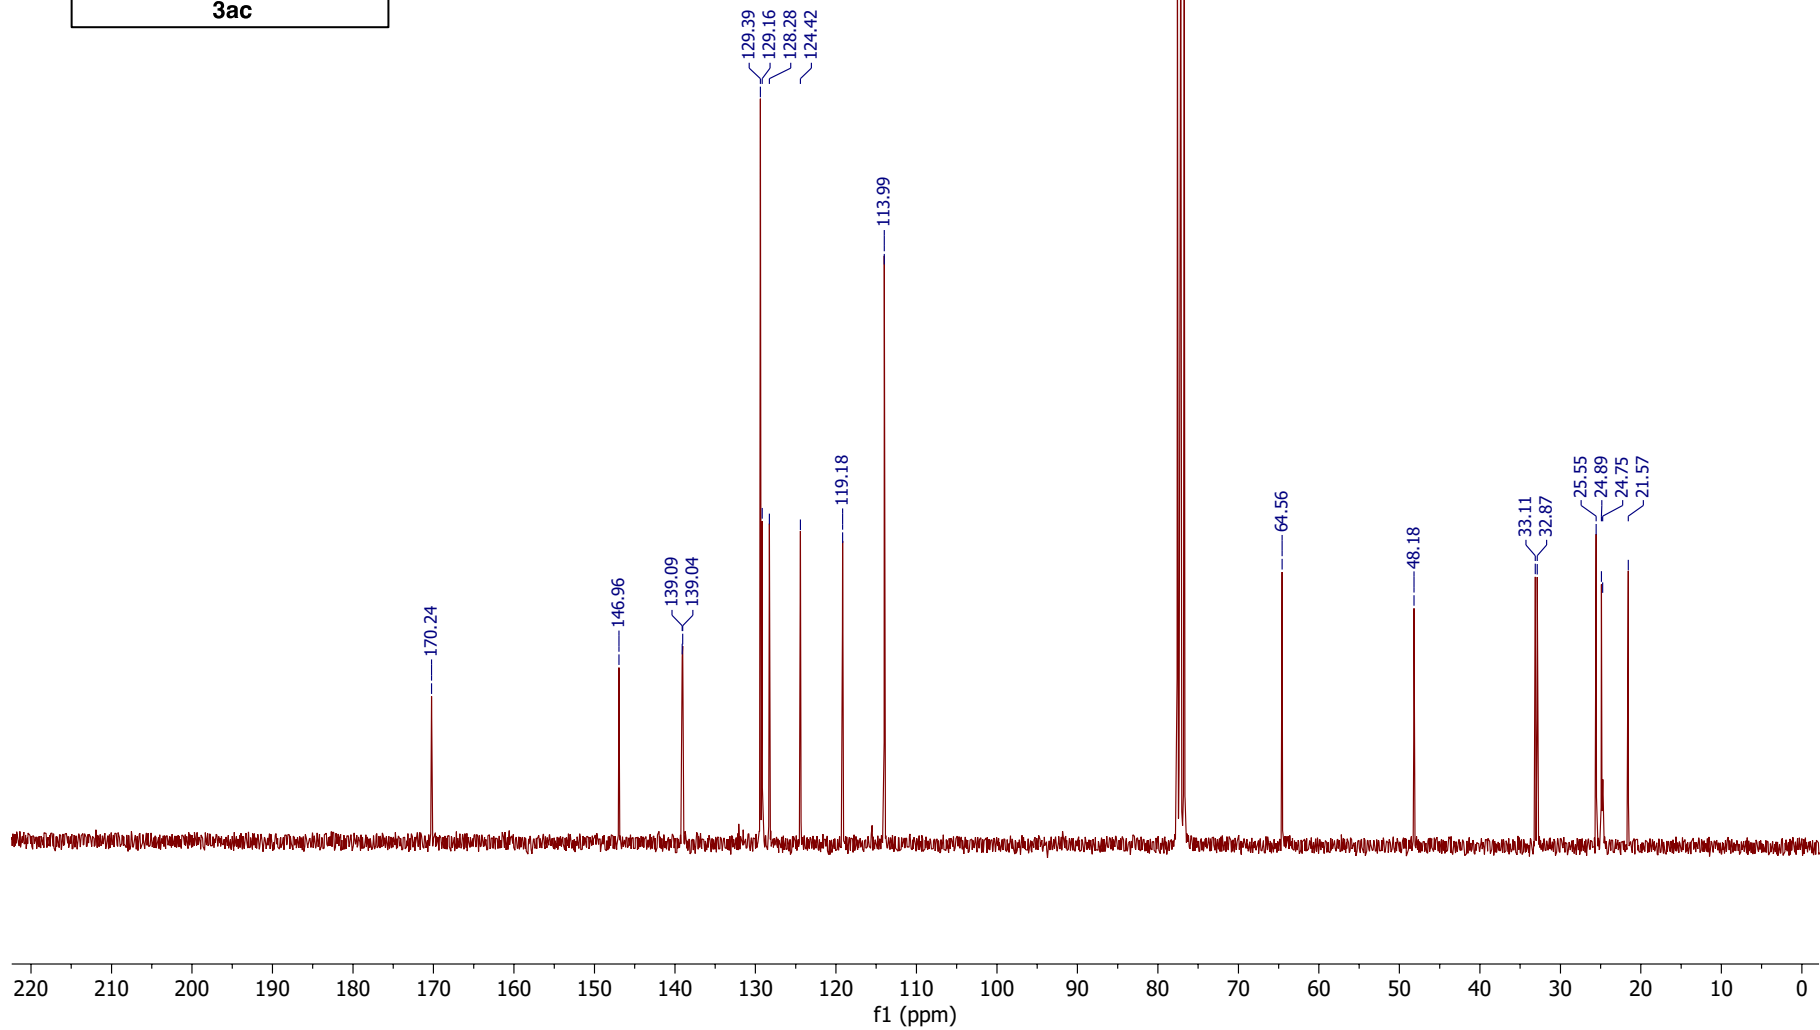

S93

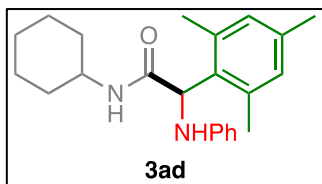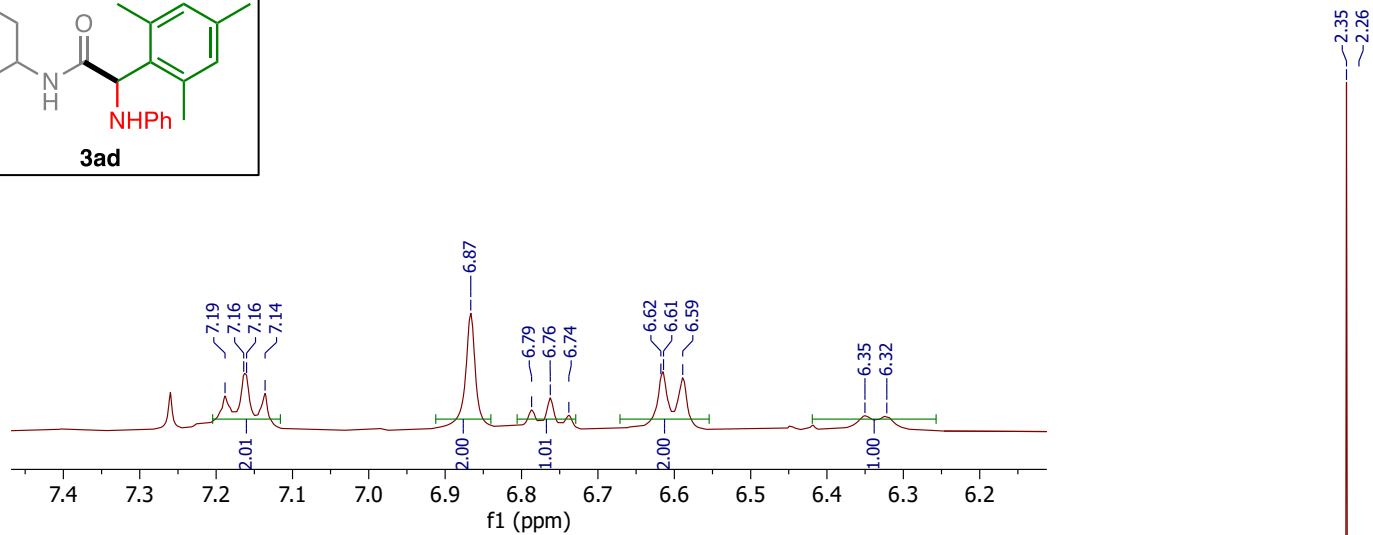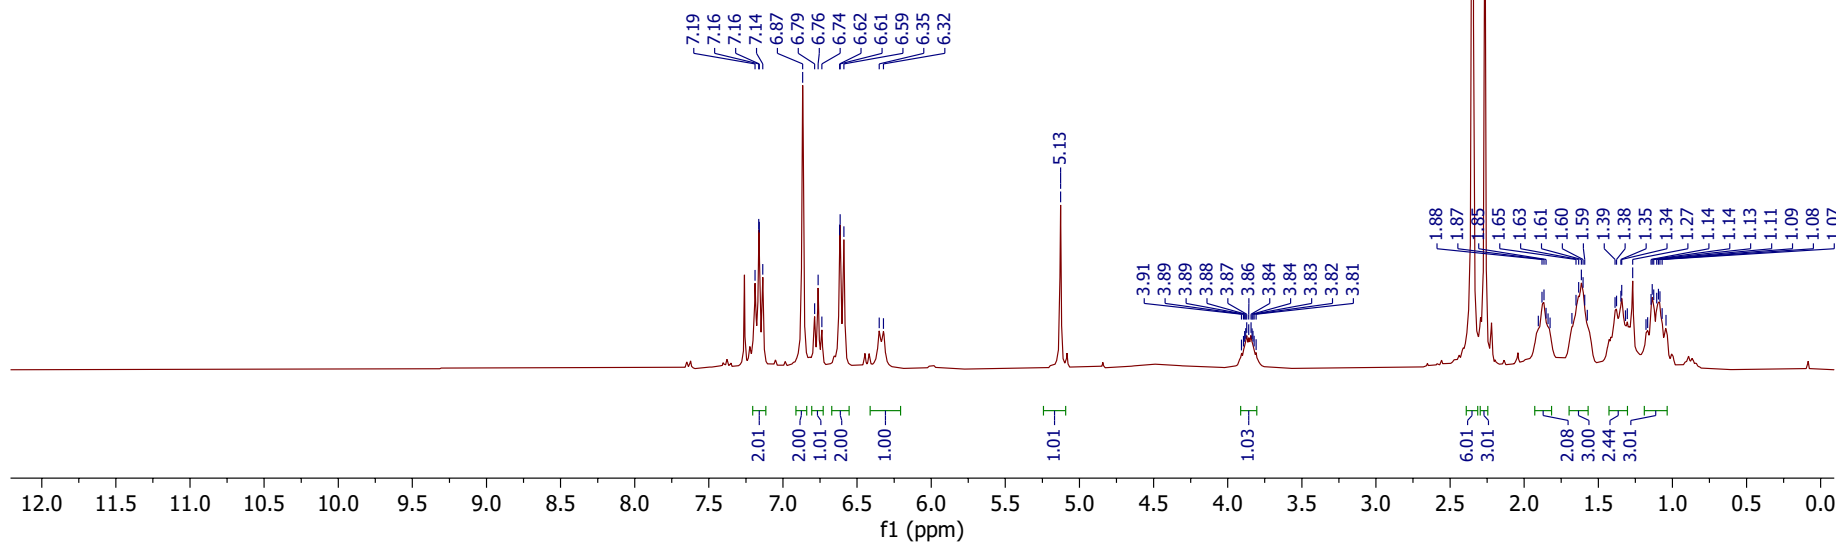

S94

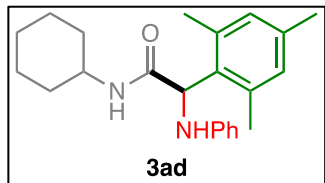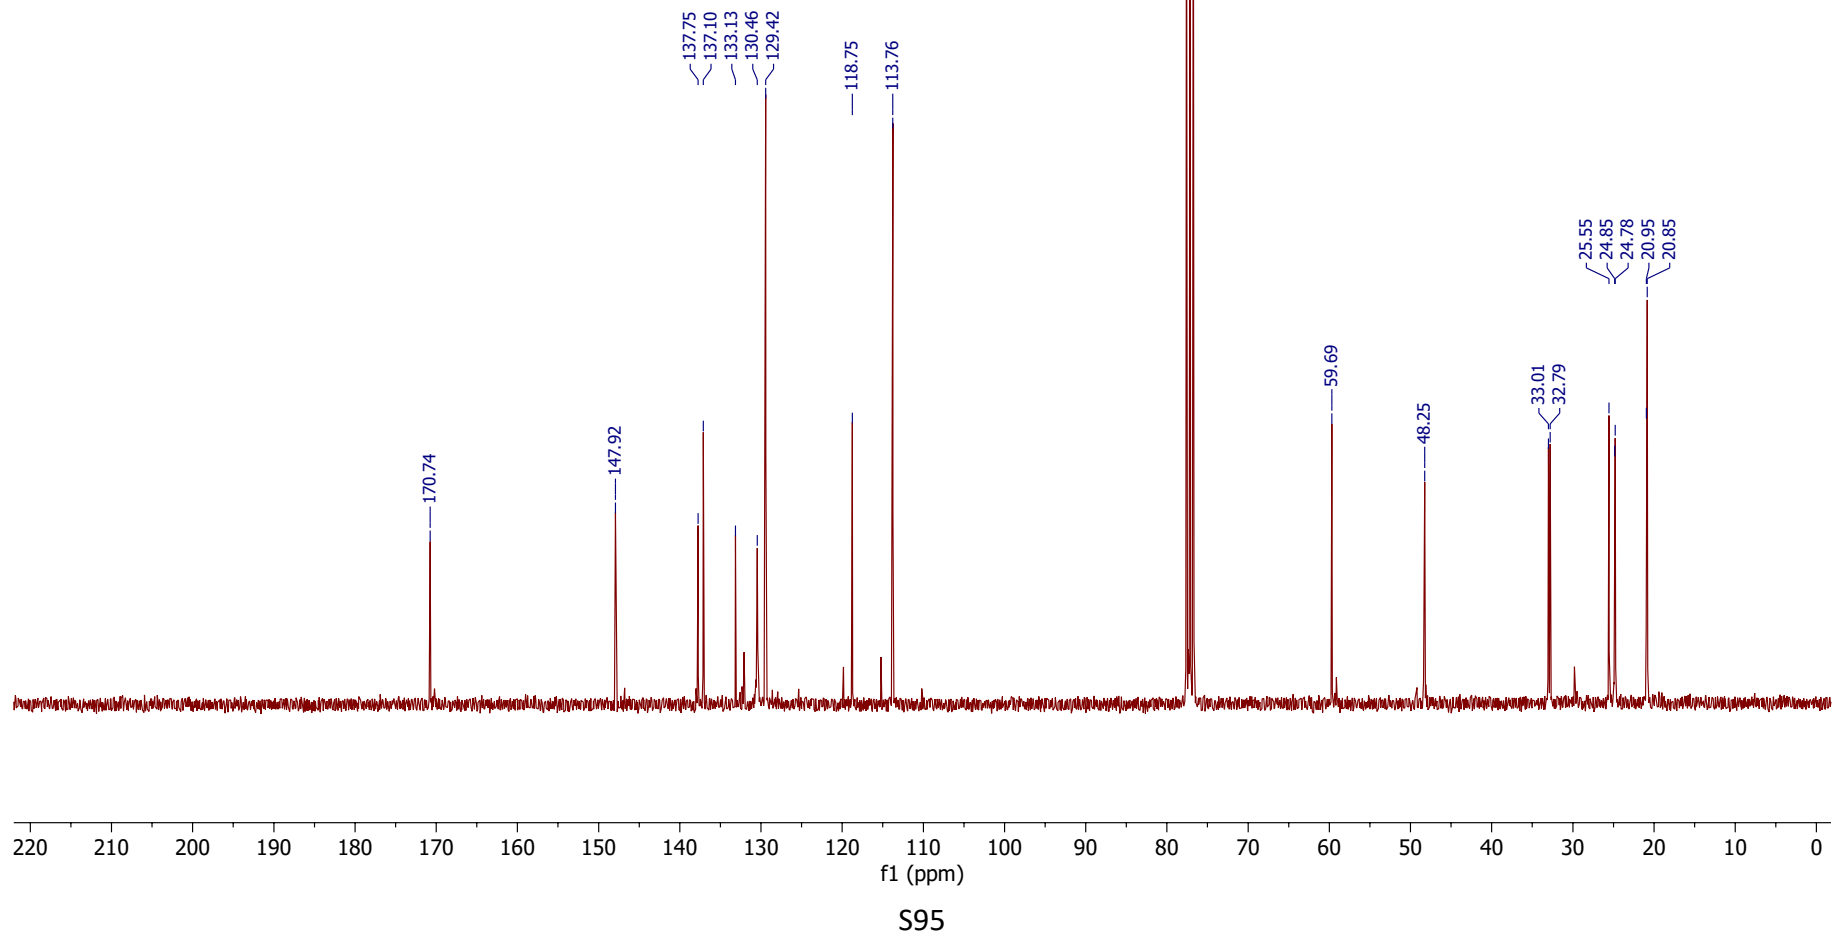



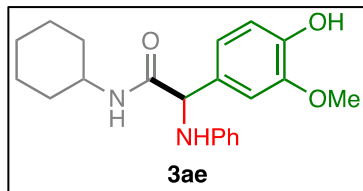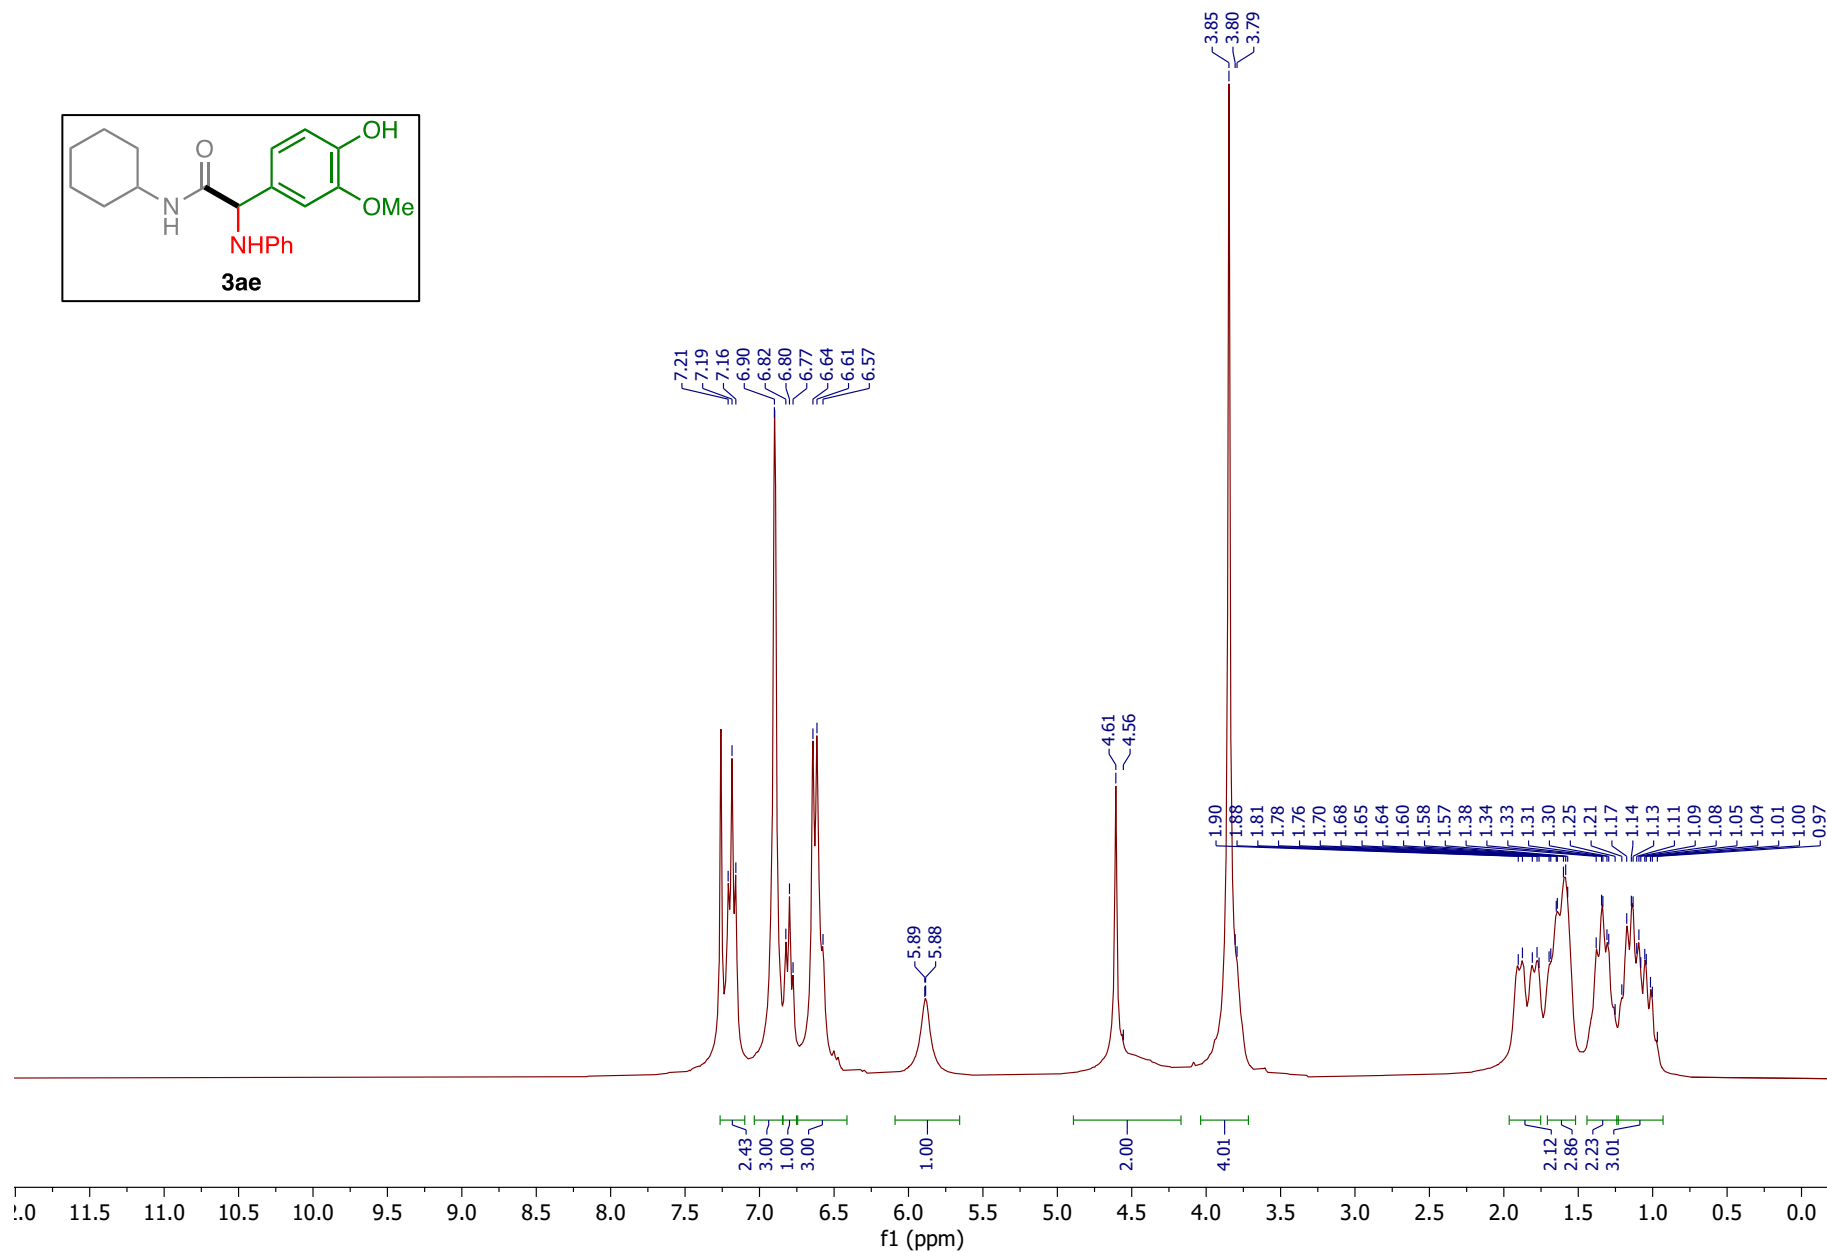

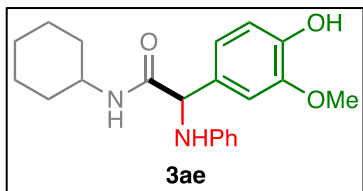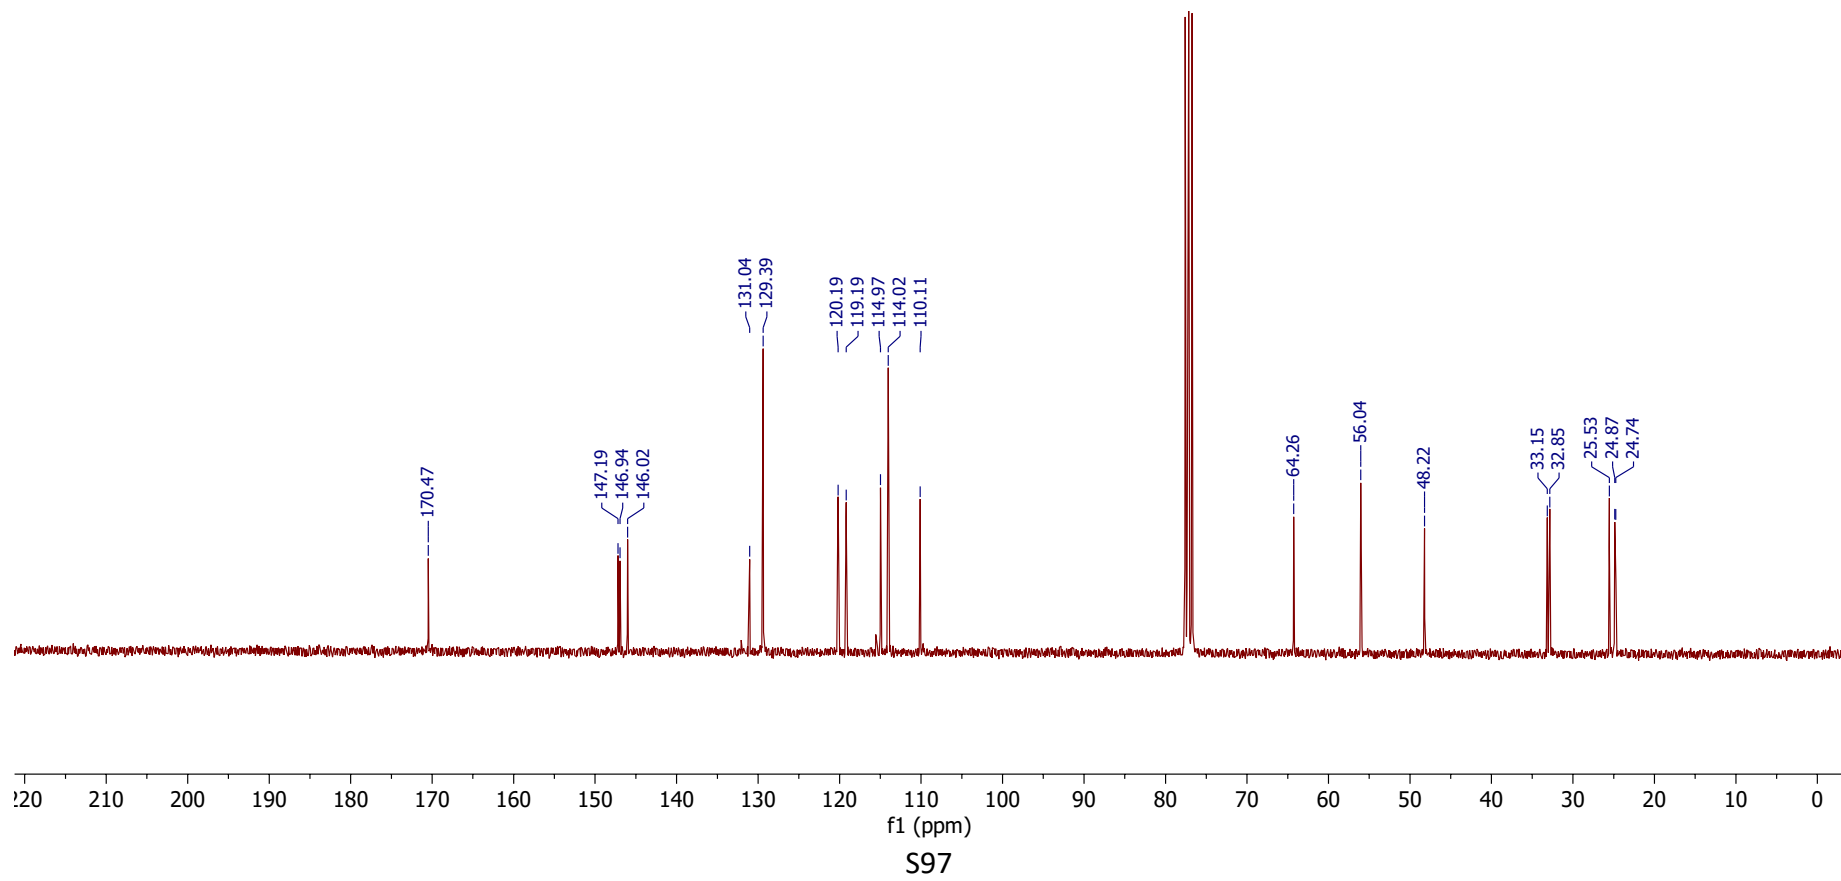

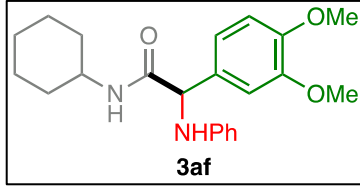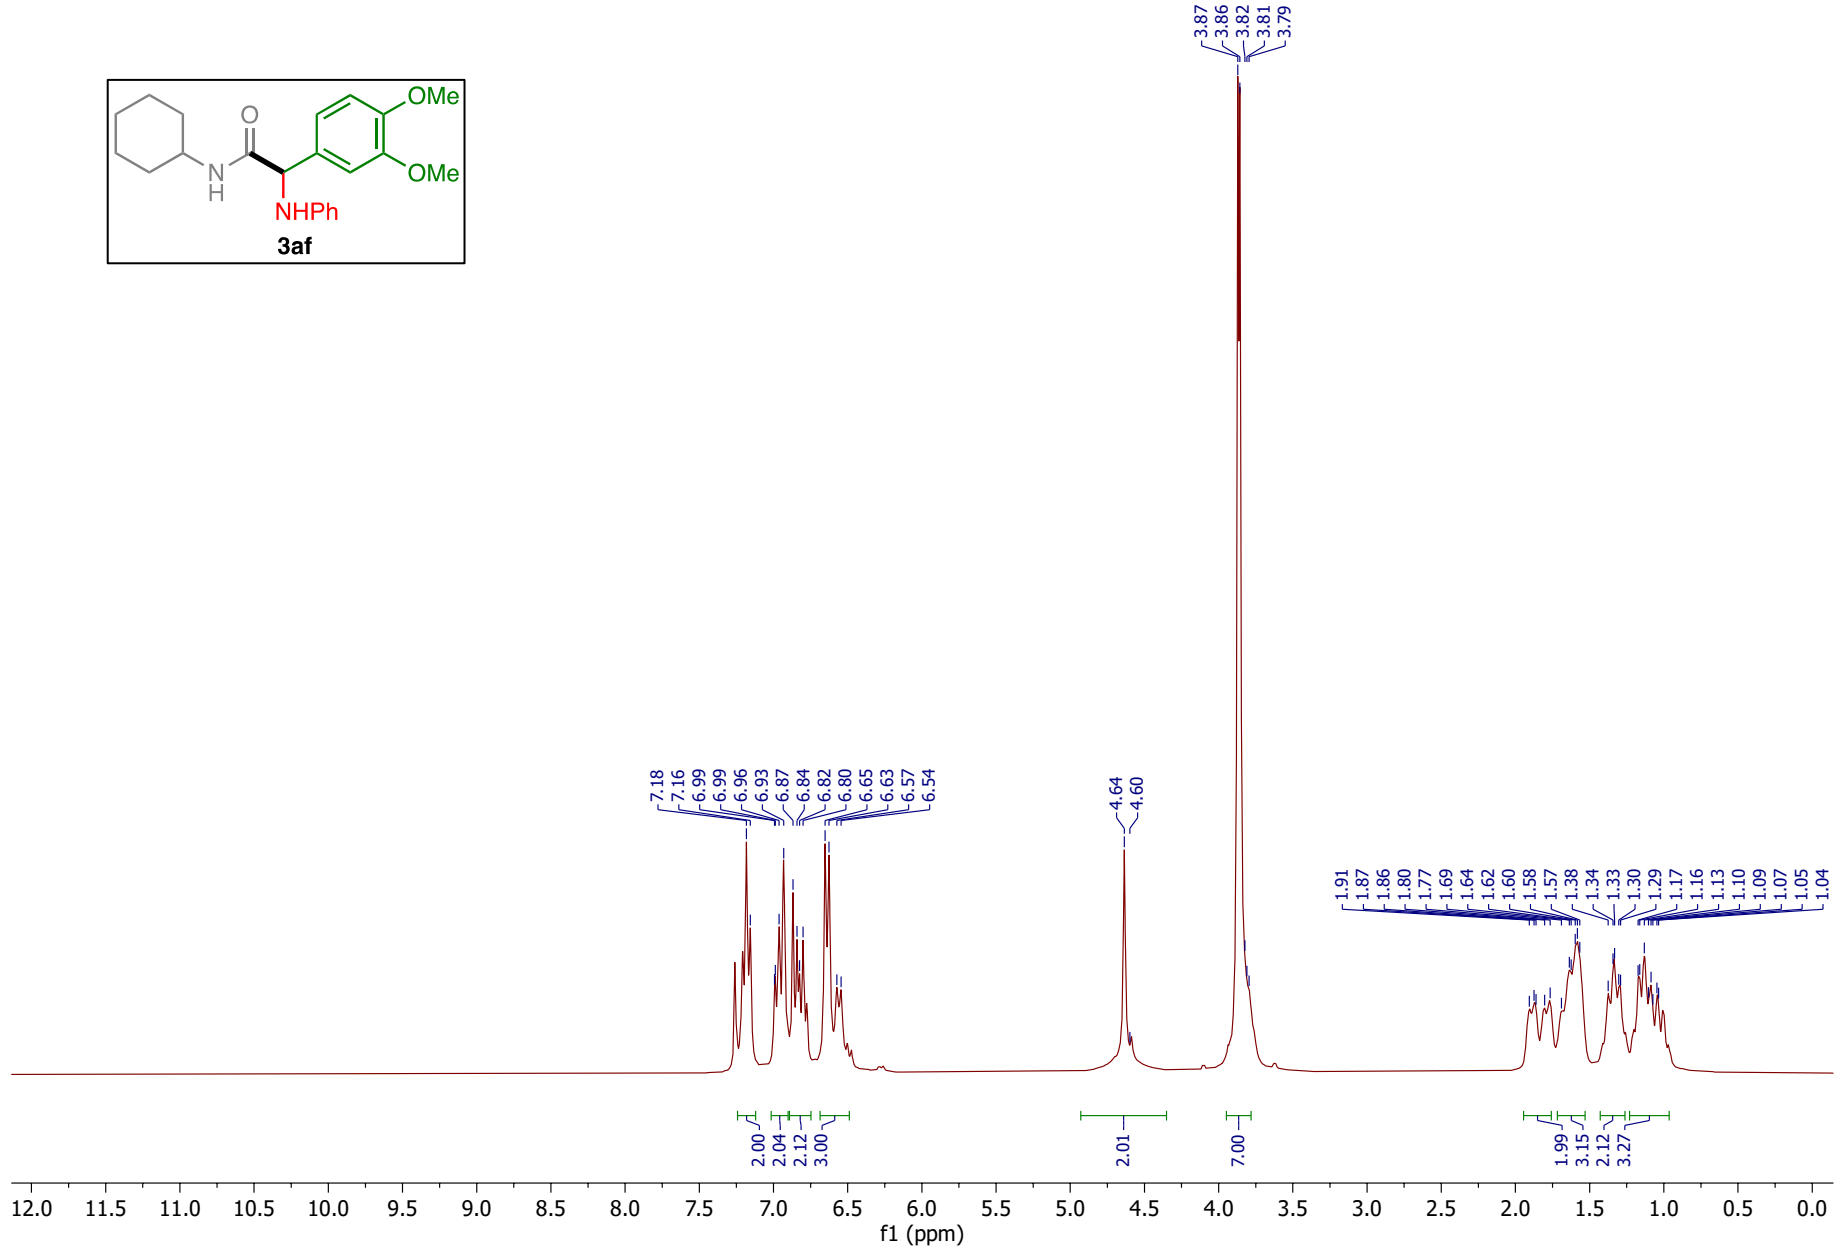

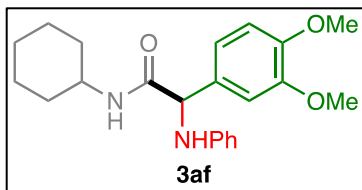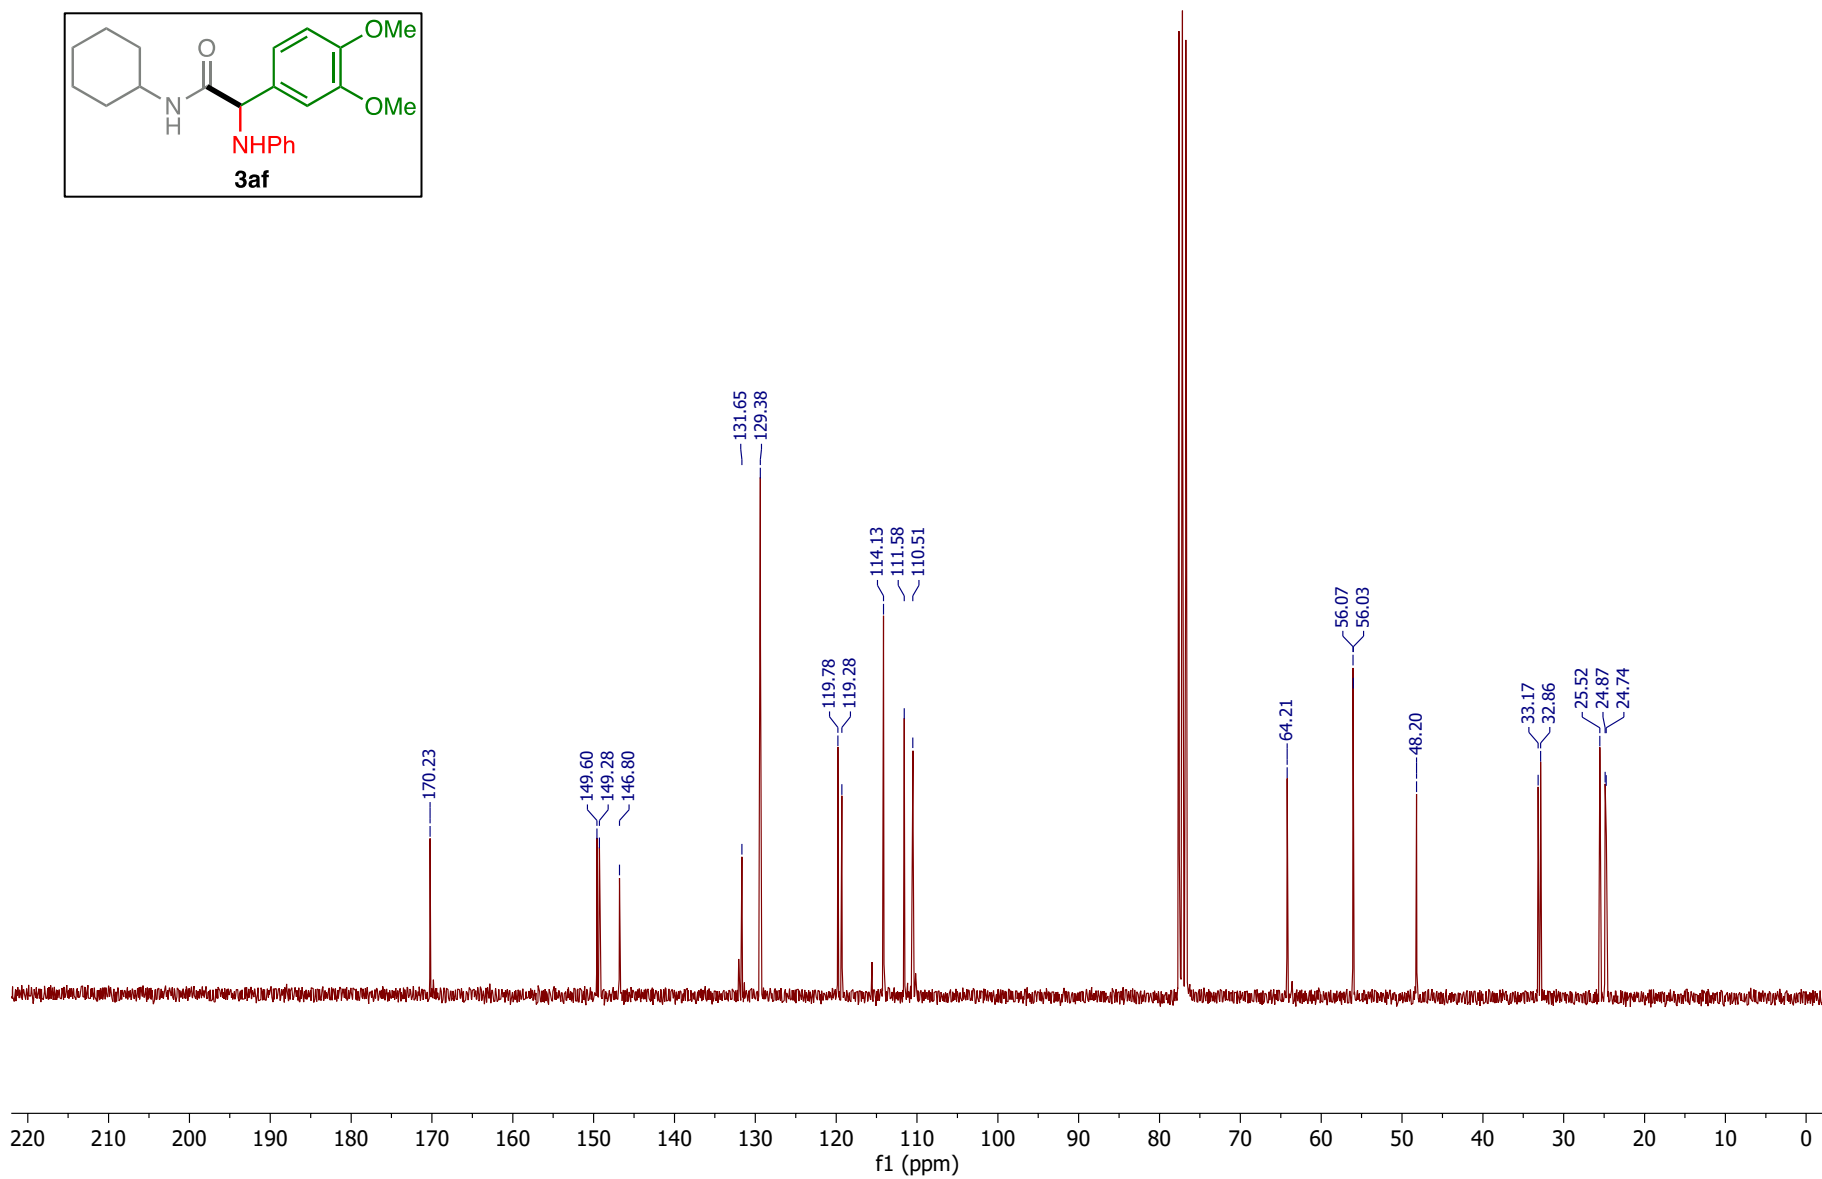

S99

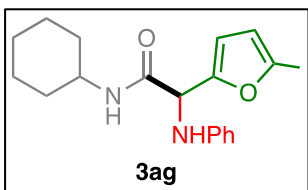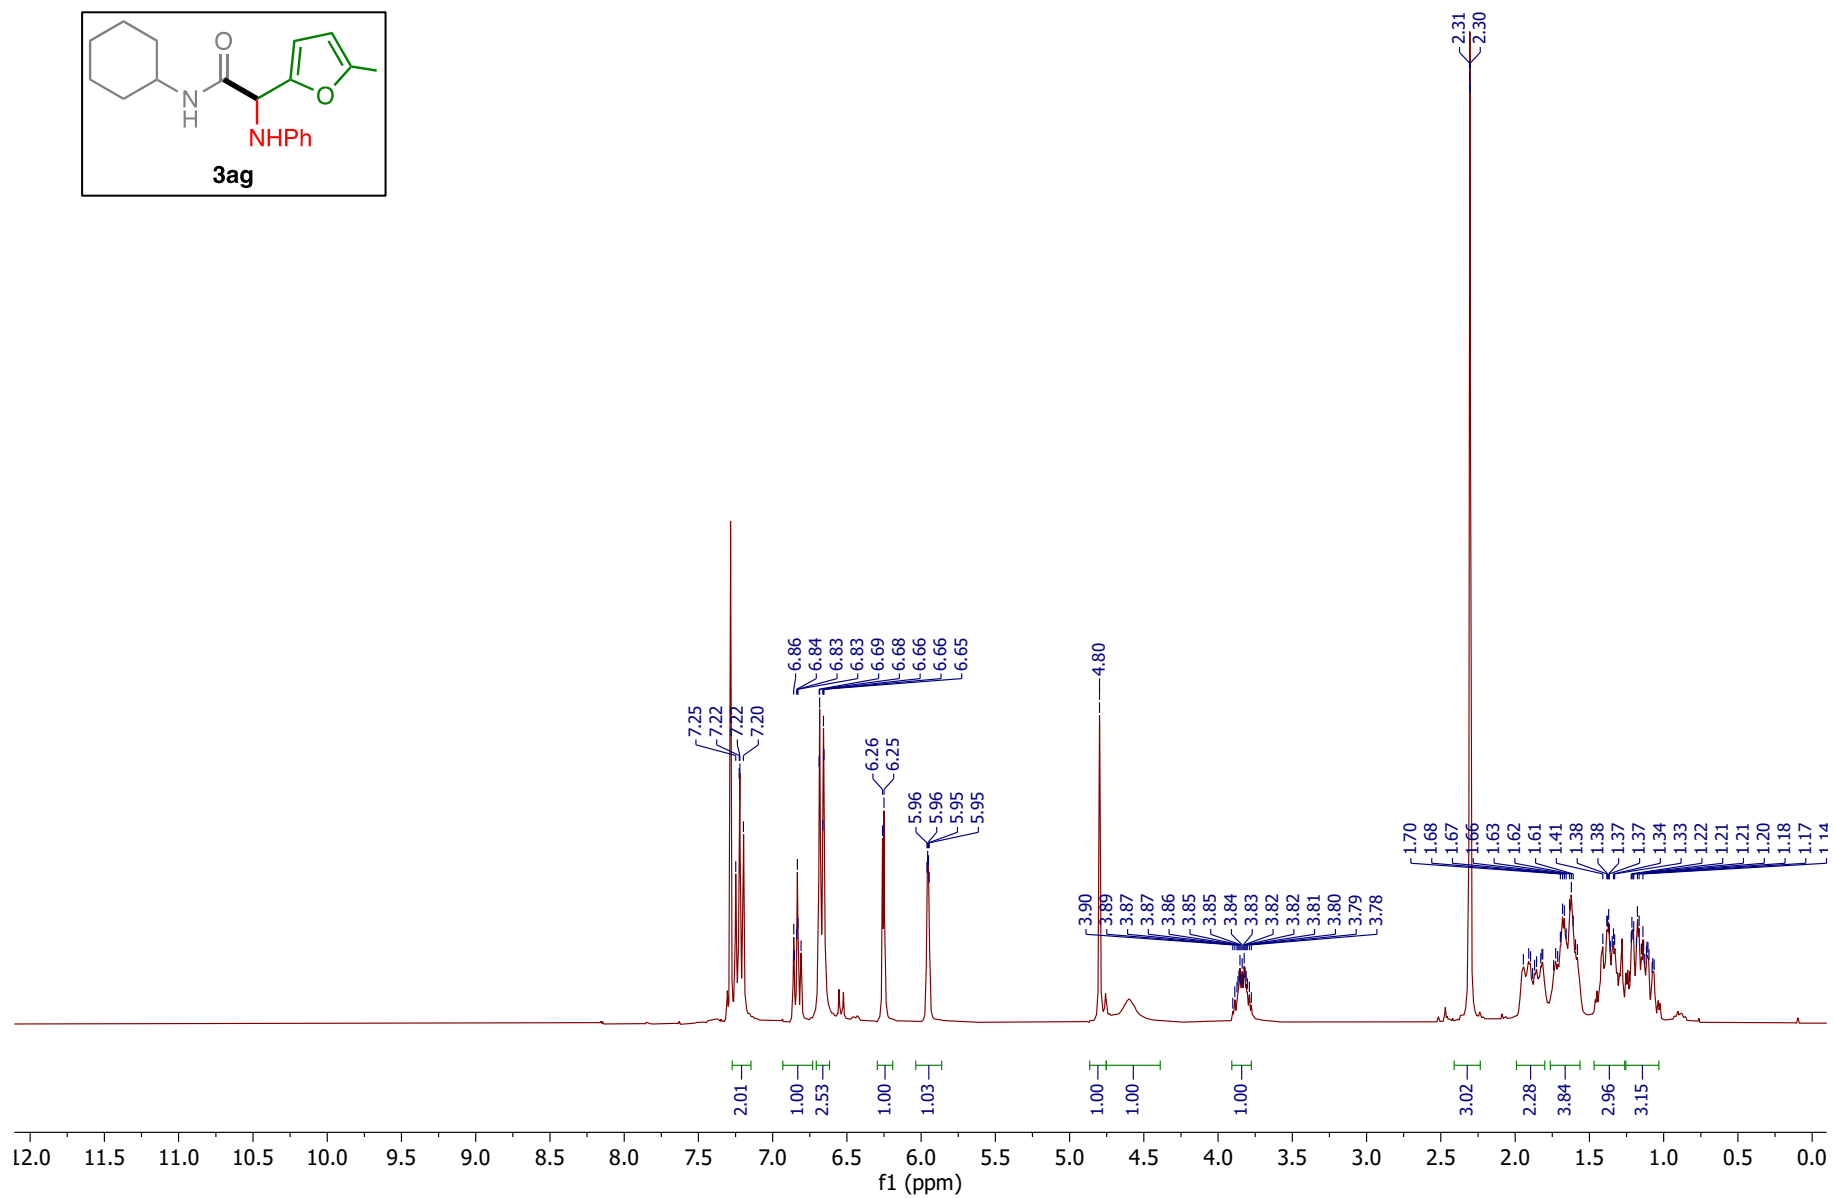

S100

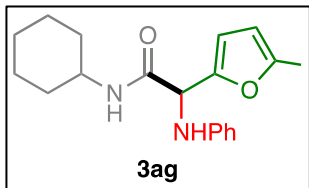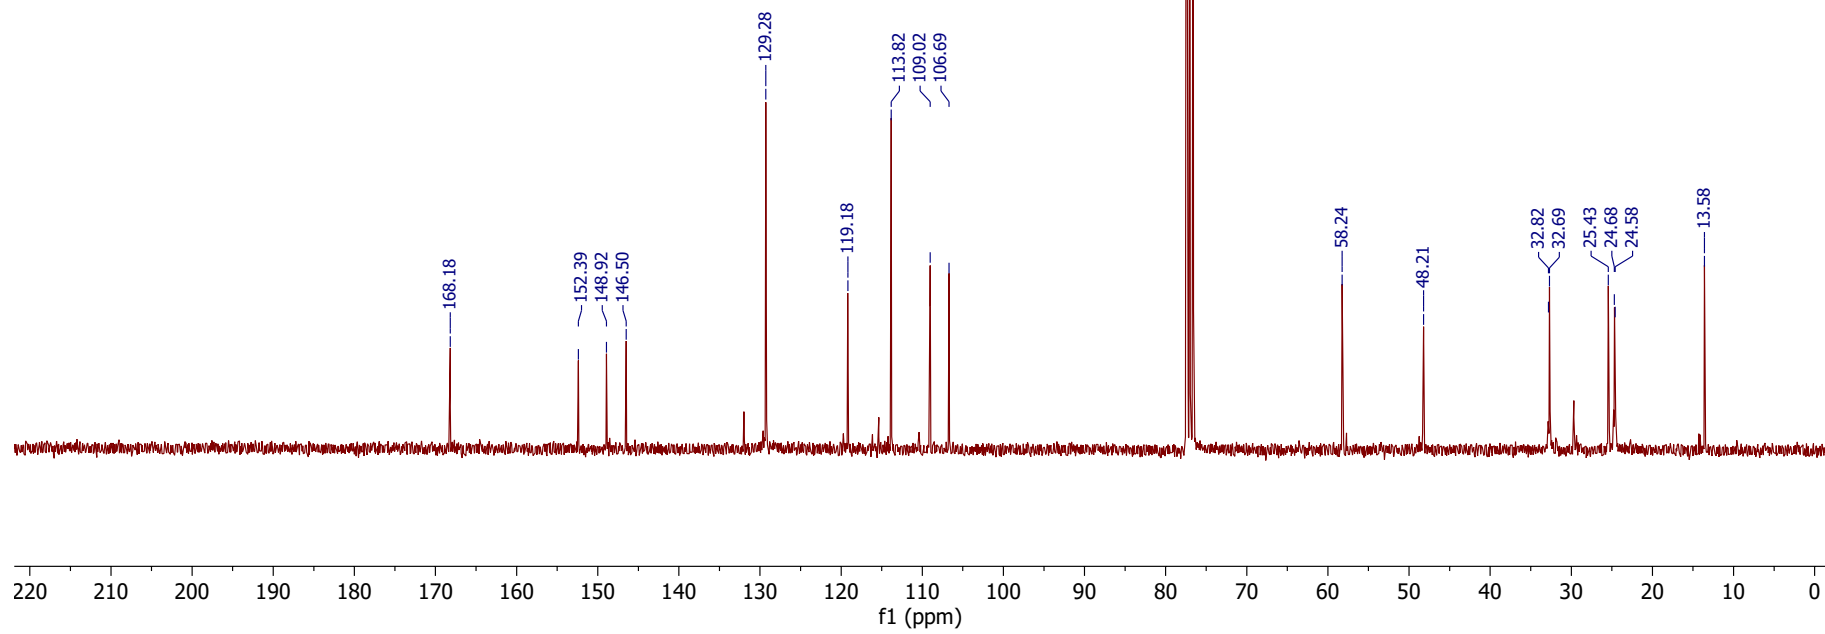

S101

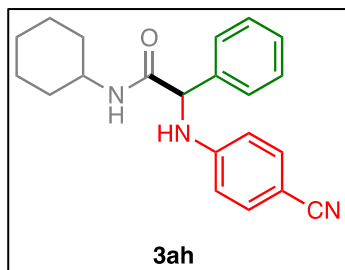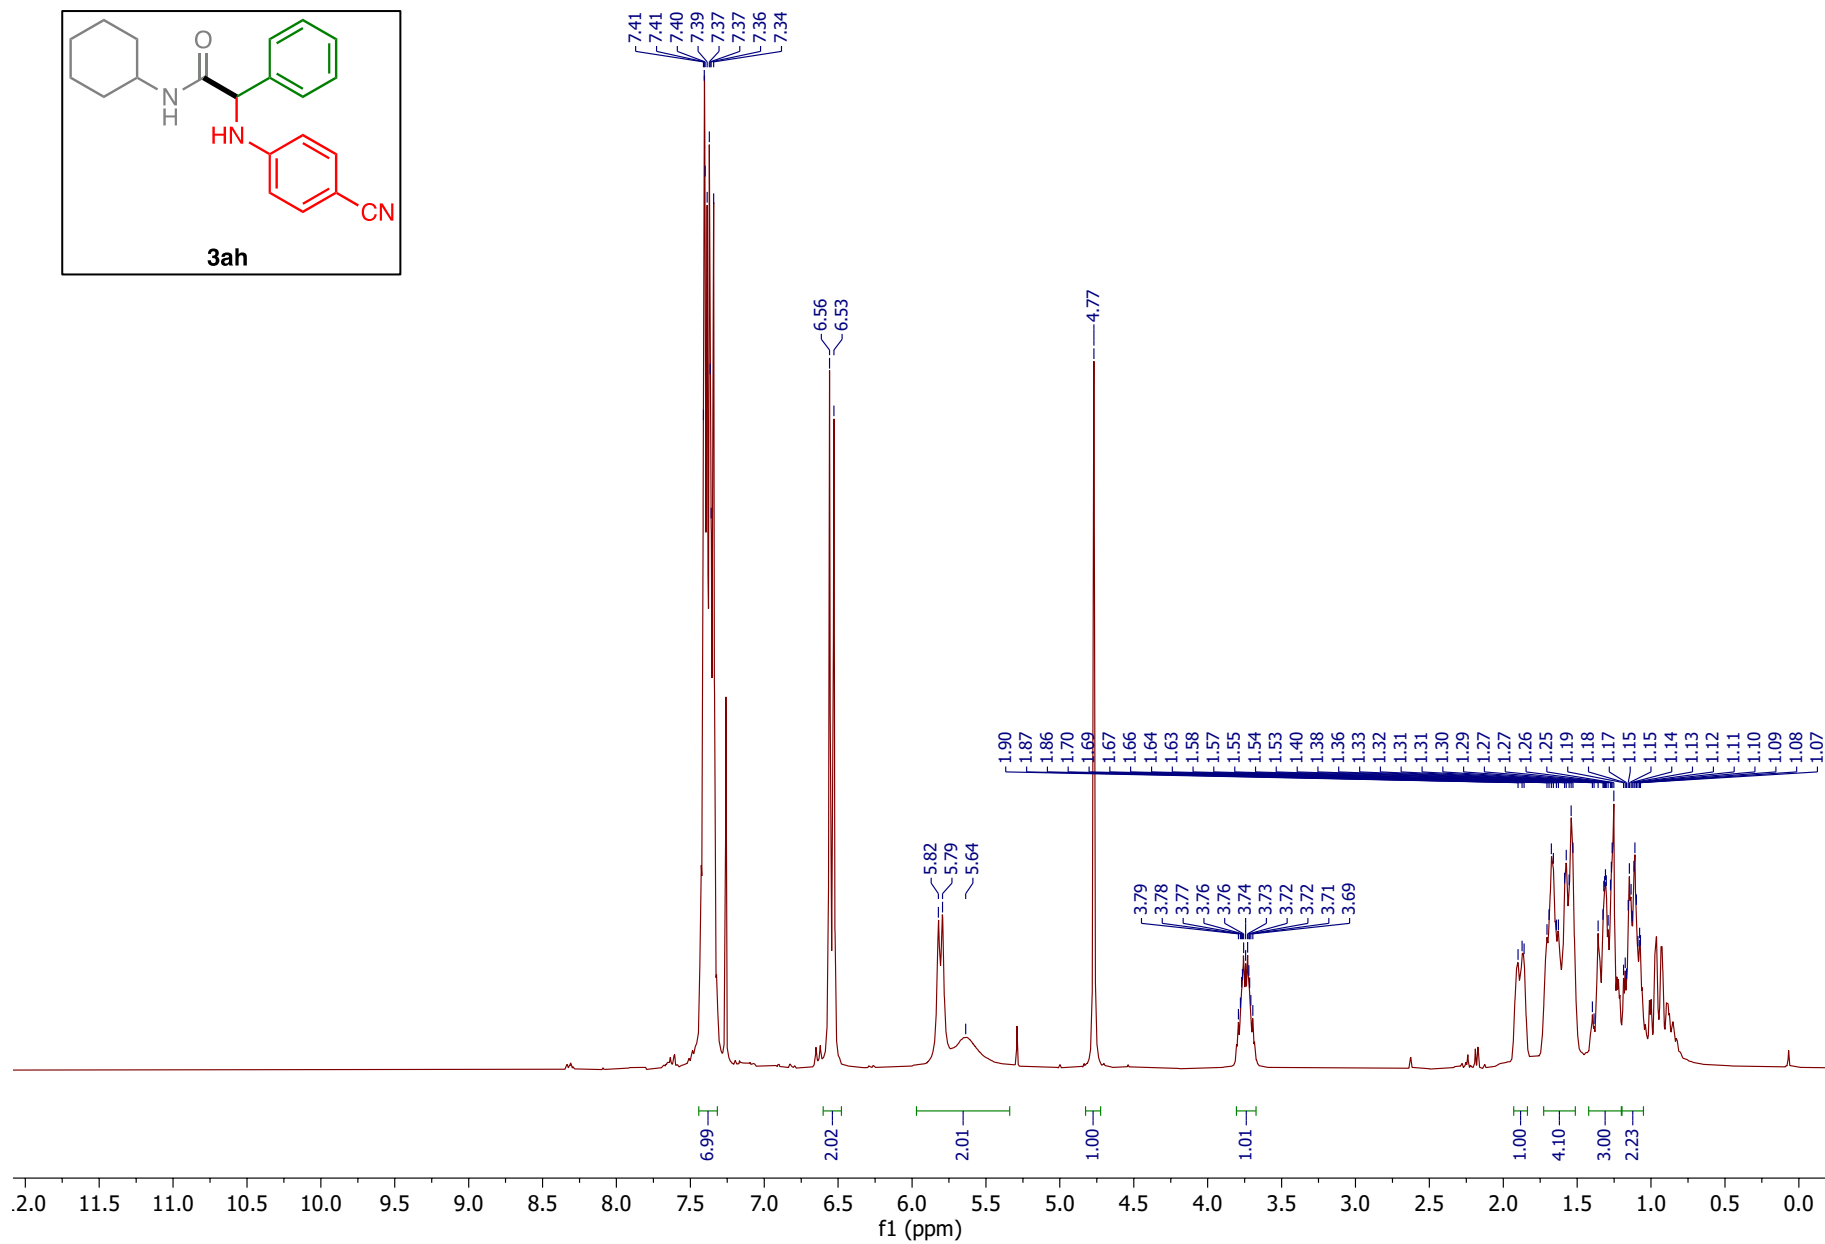

S102

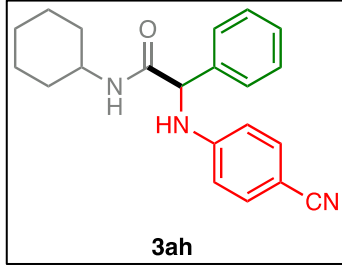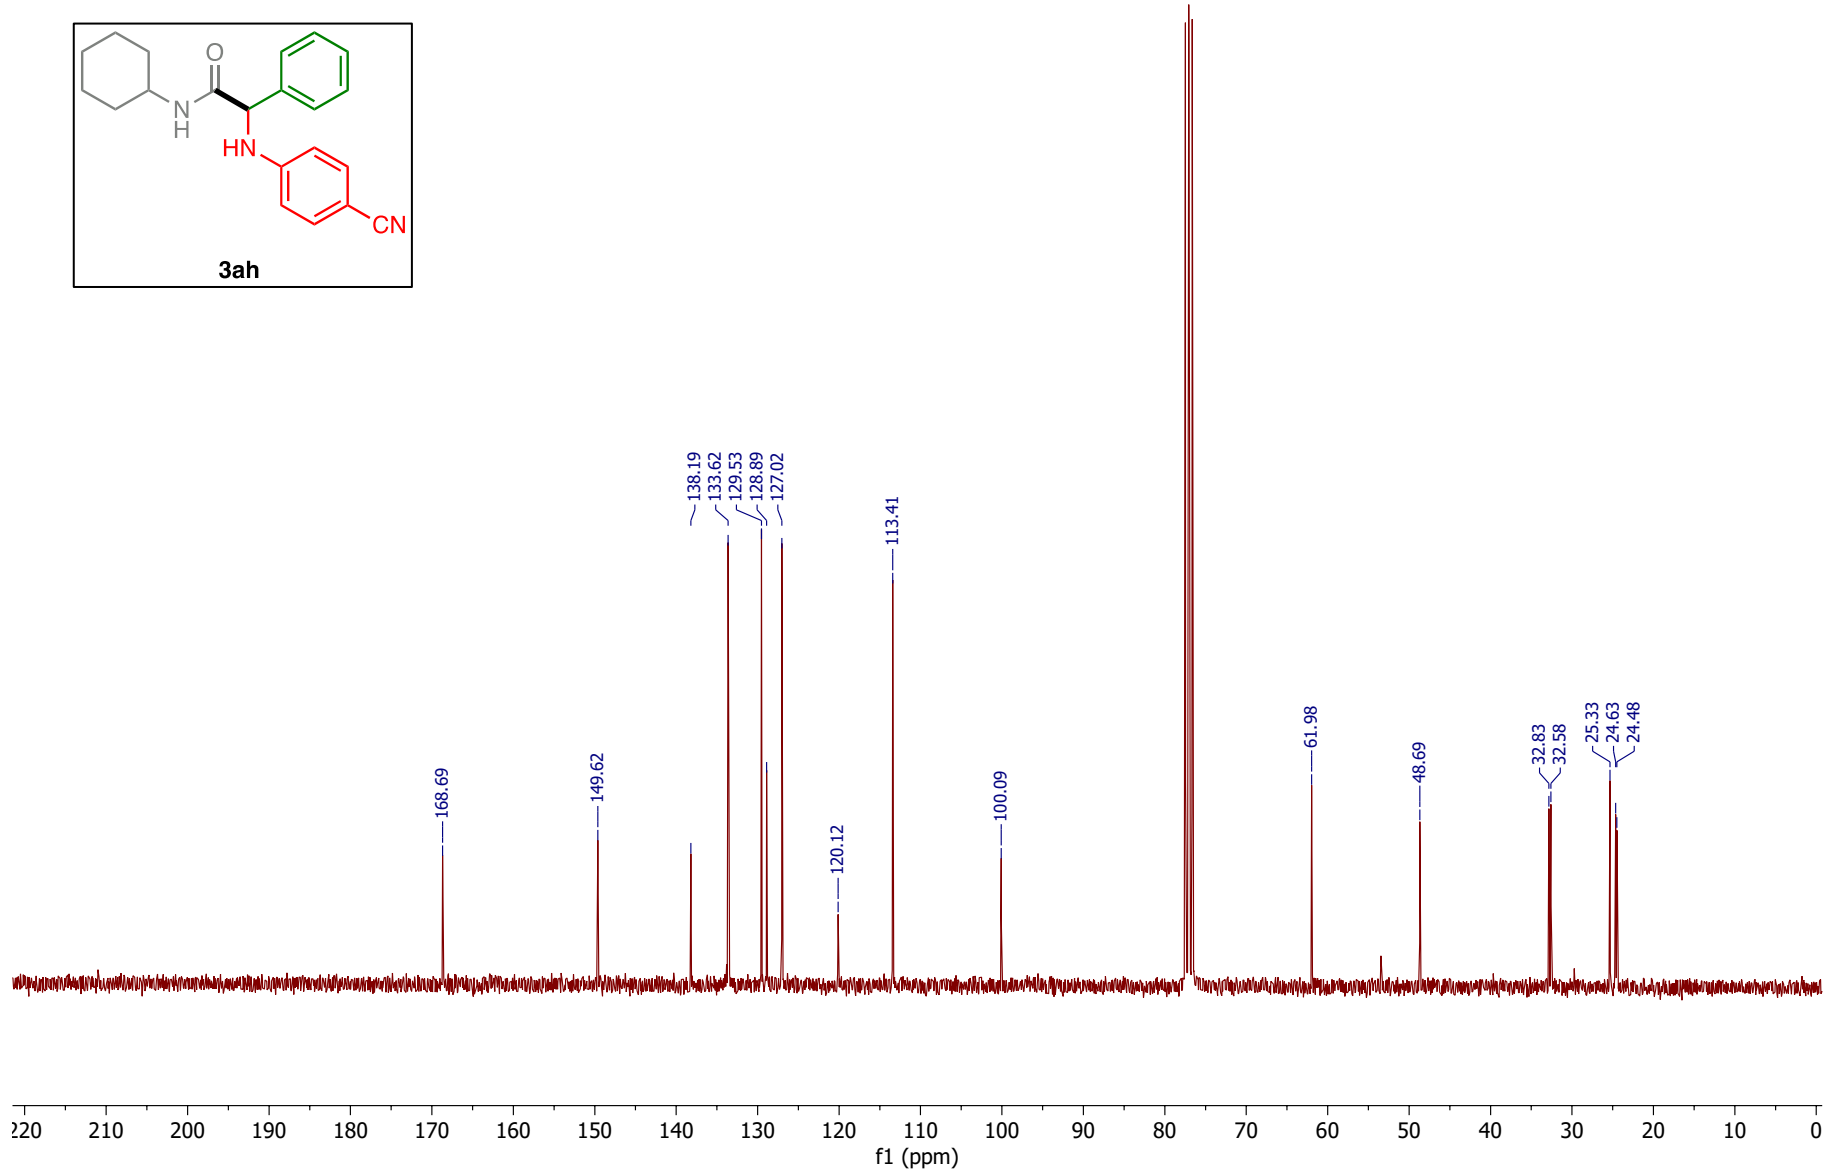

S103



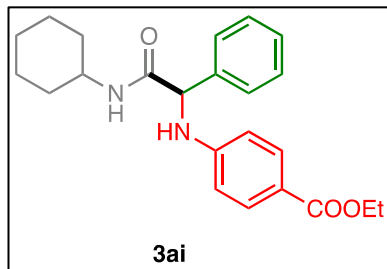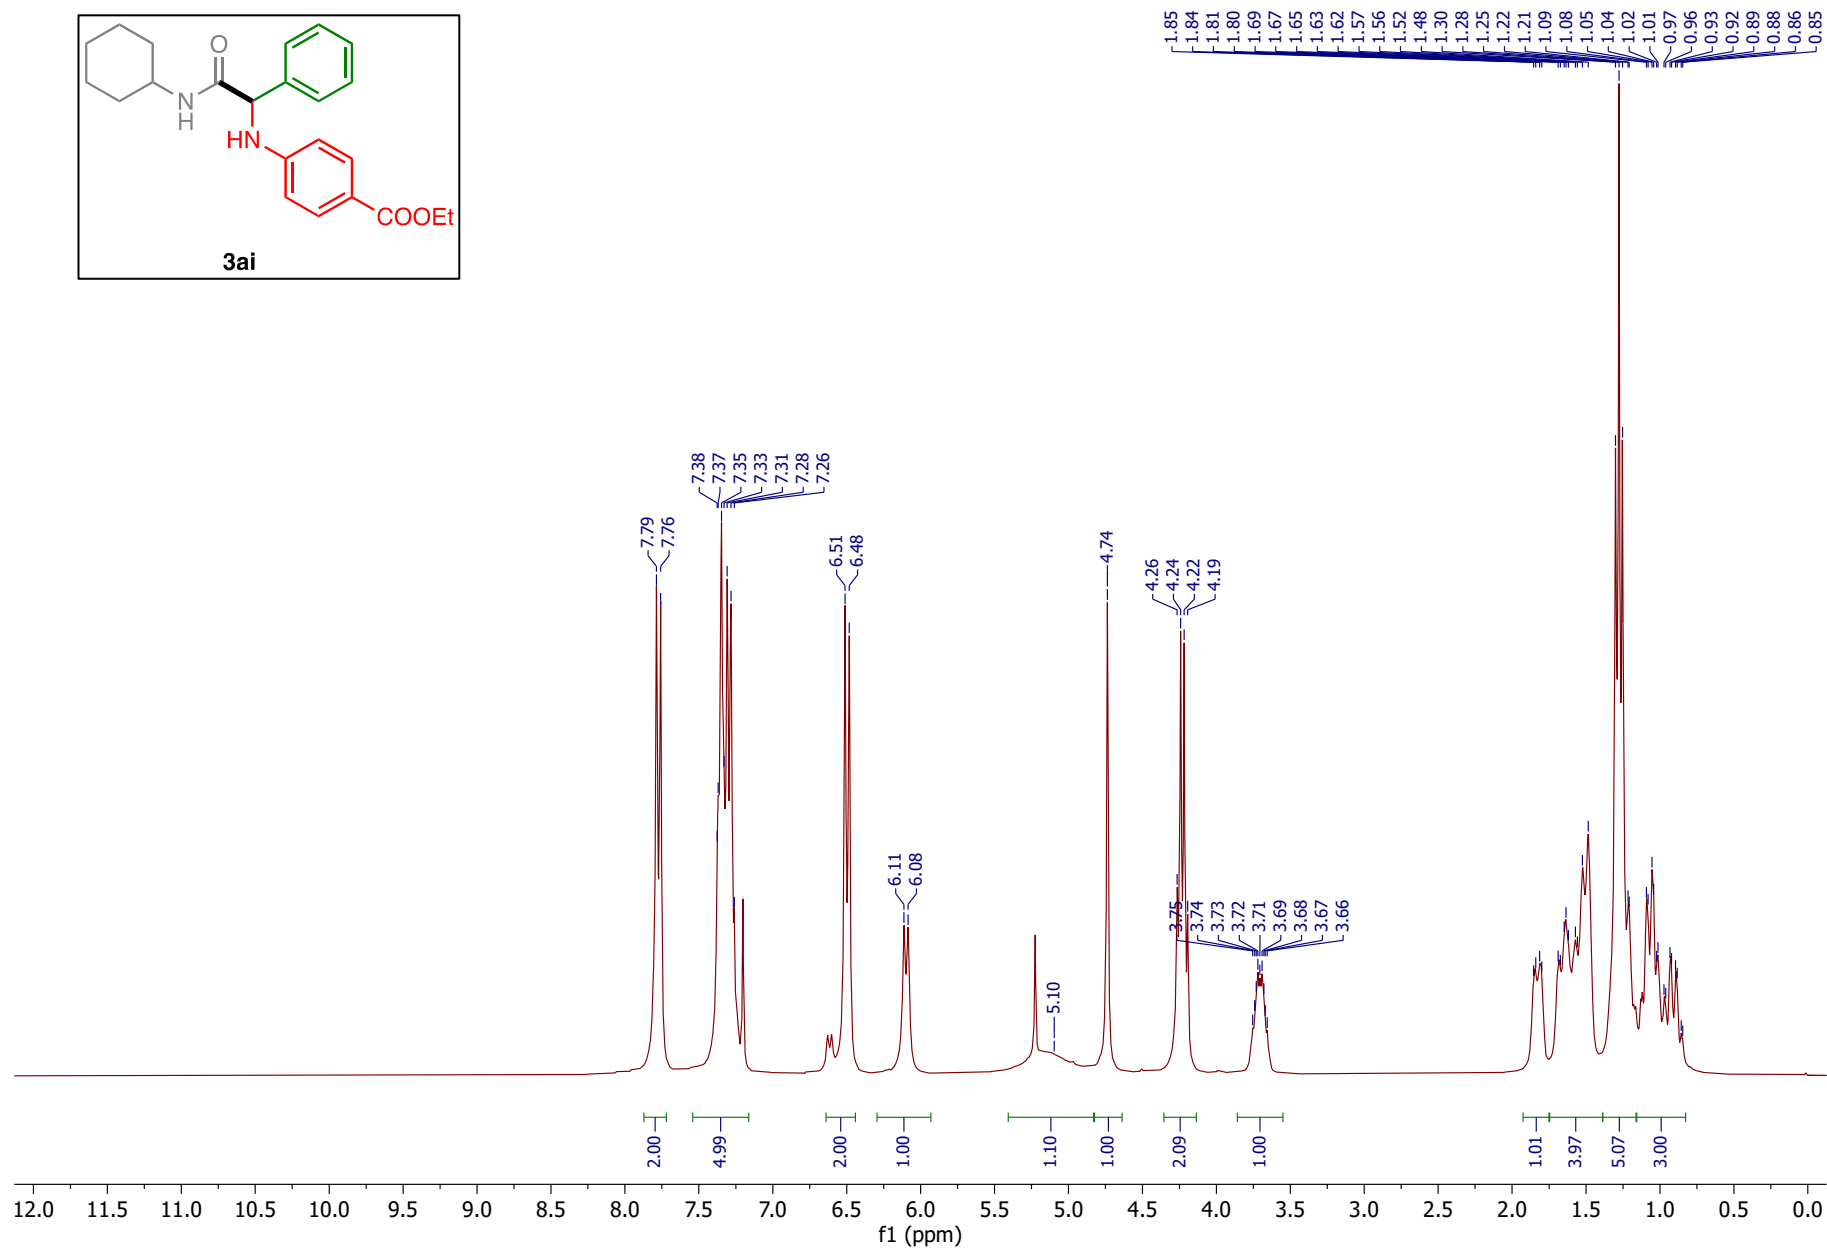

S104

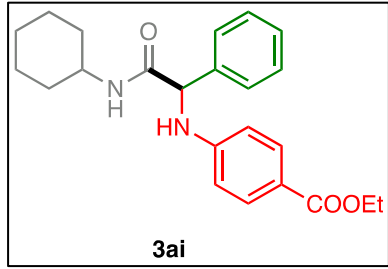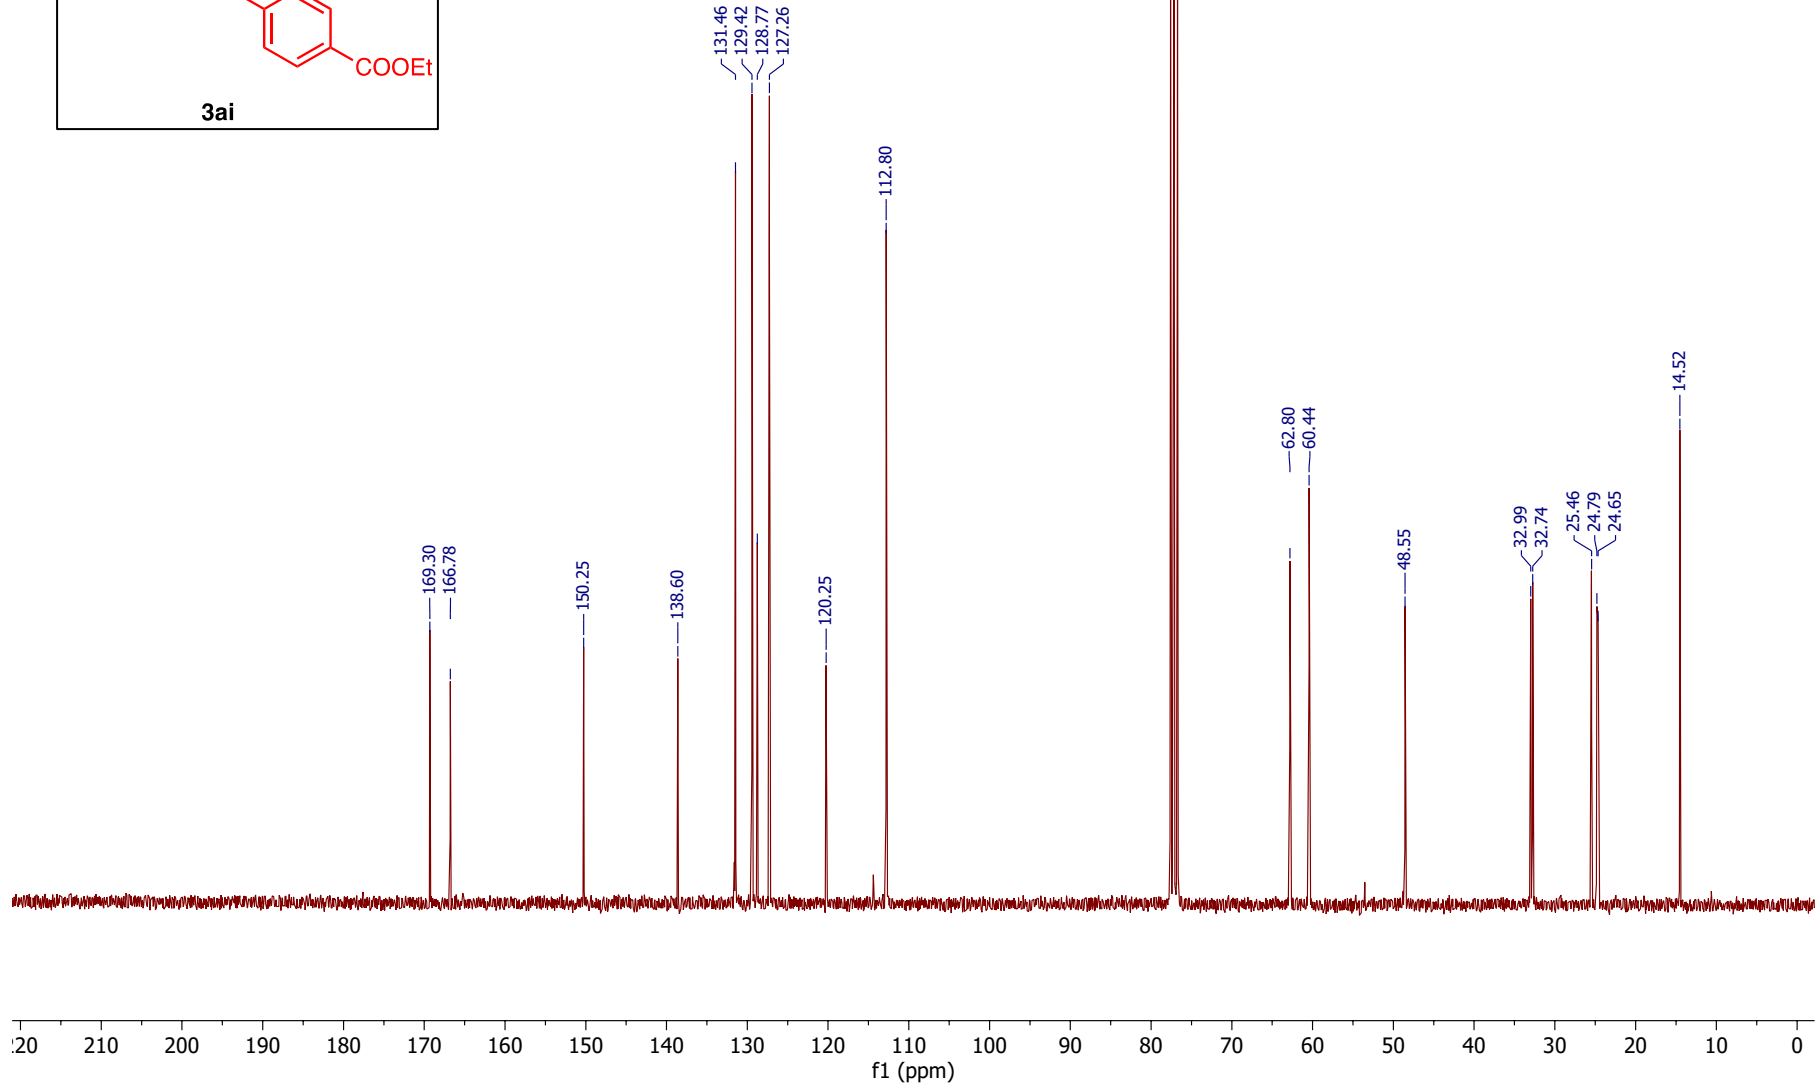

S105

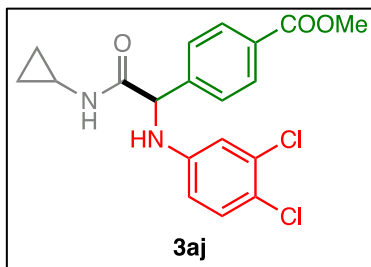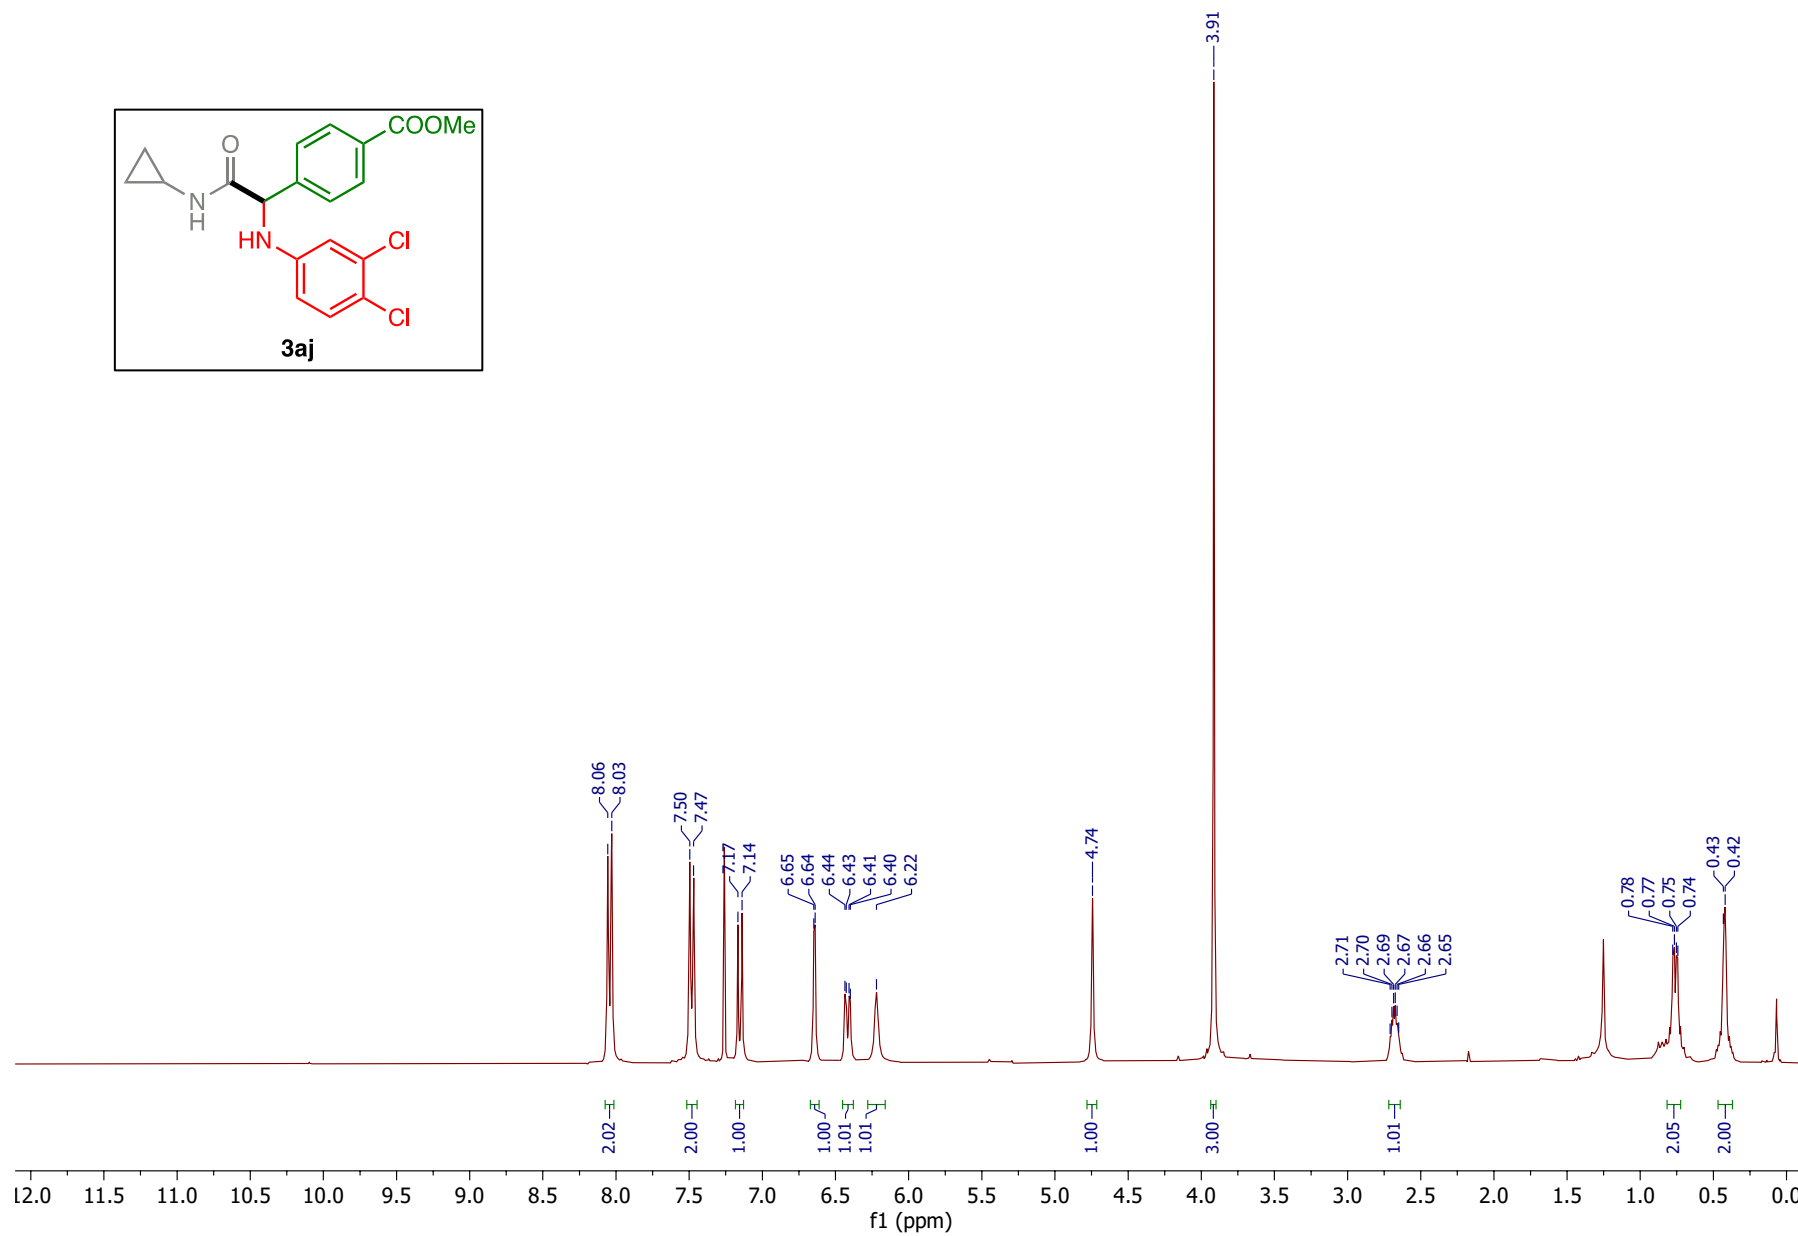

S106

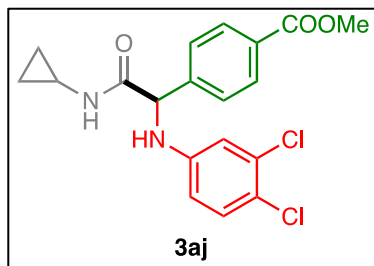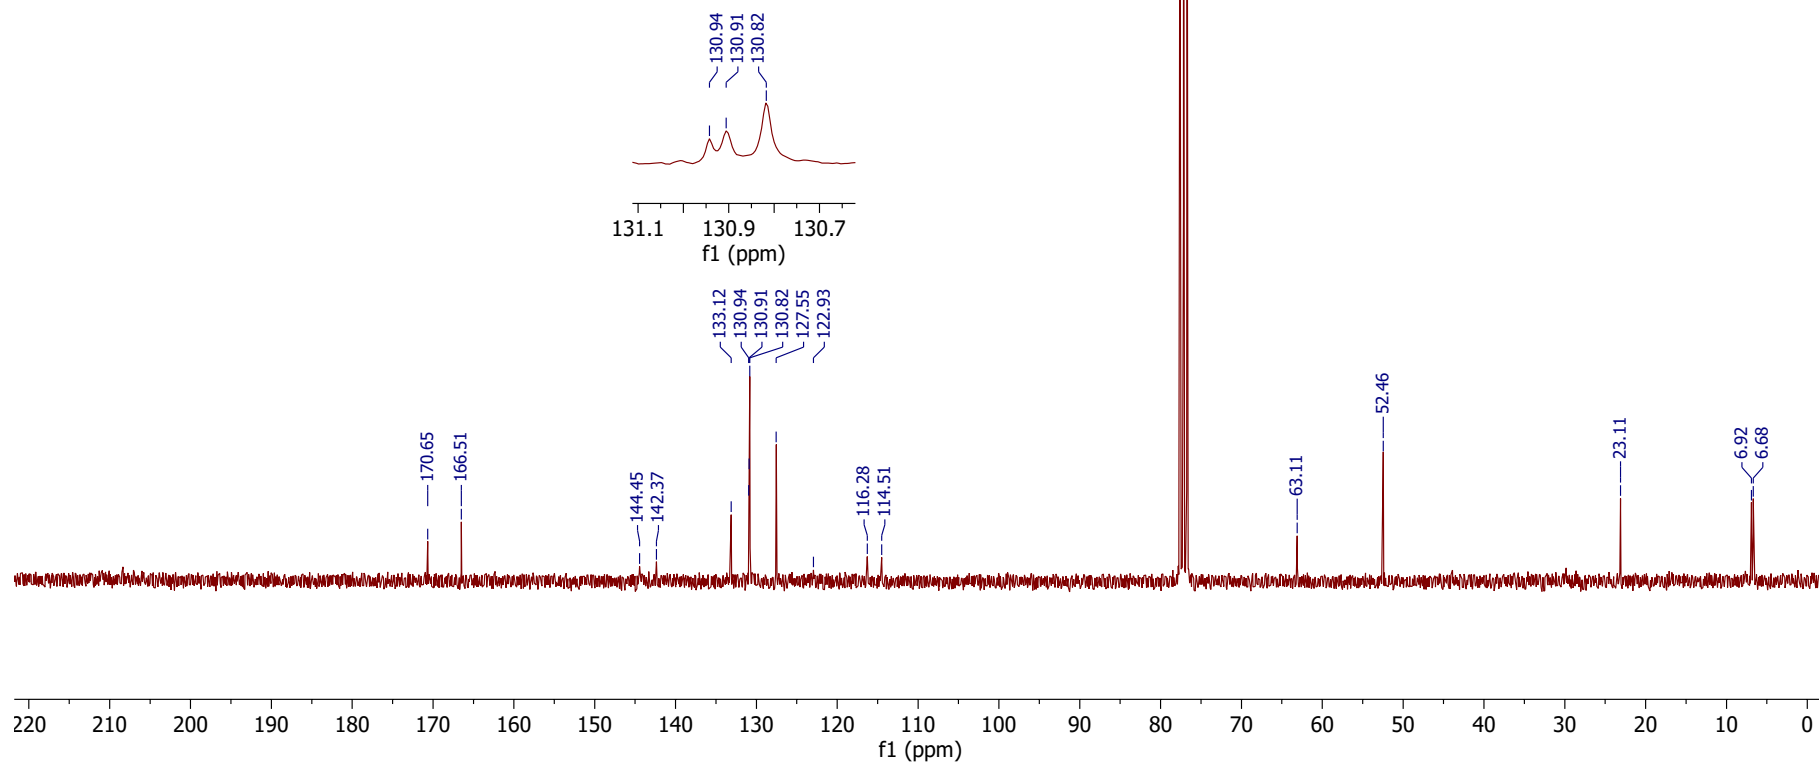

S107

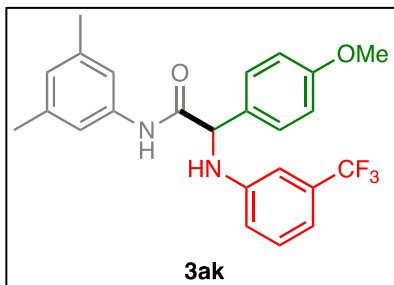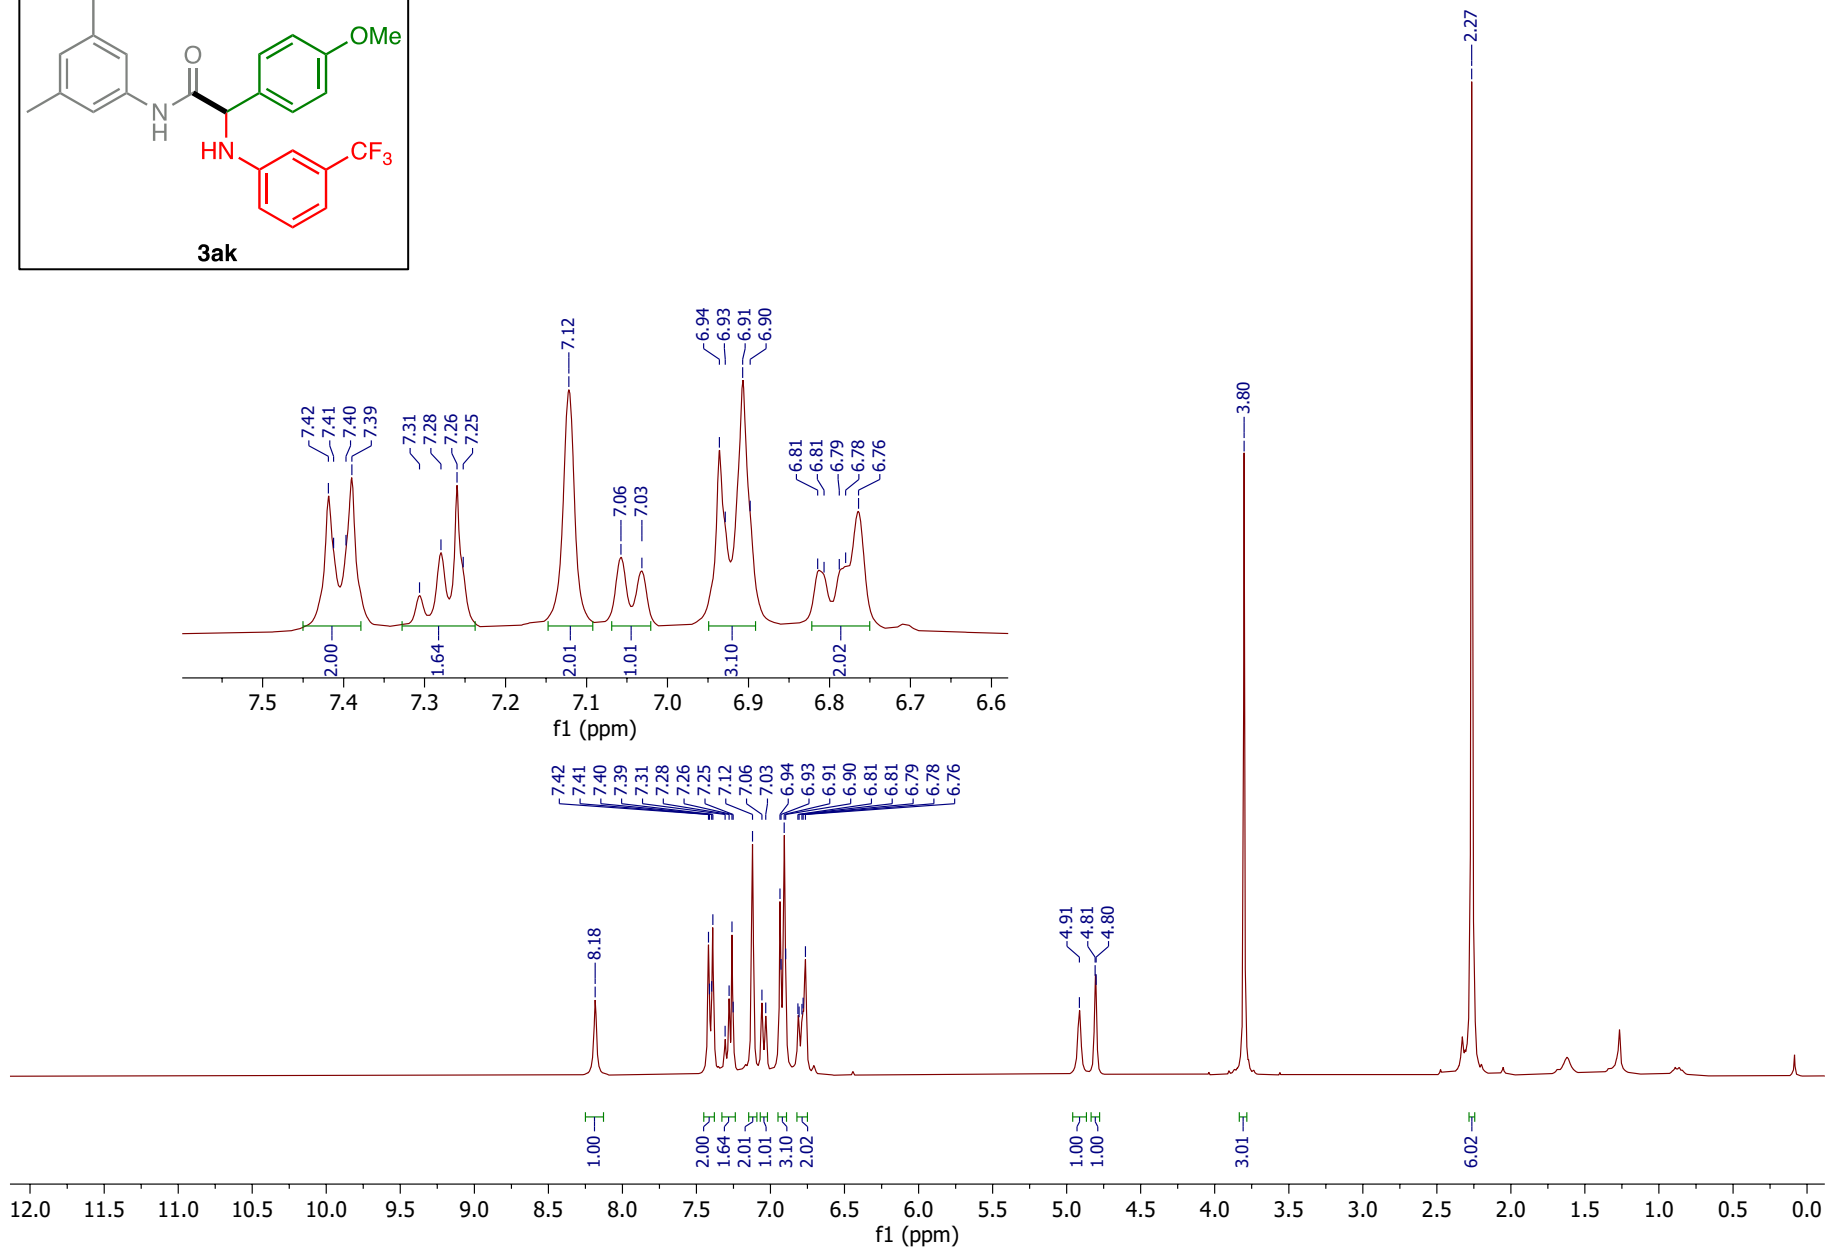

S108

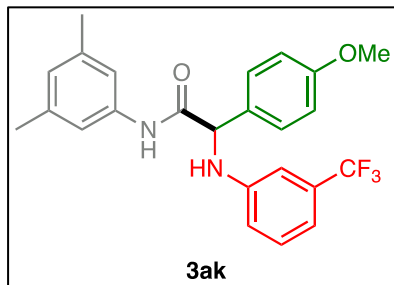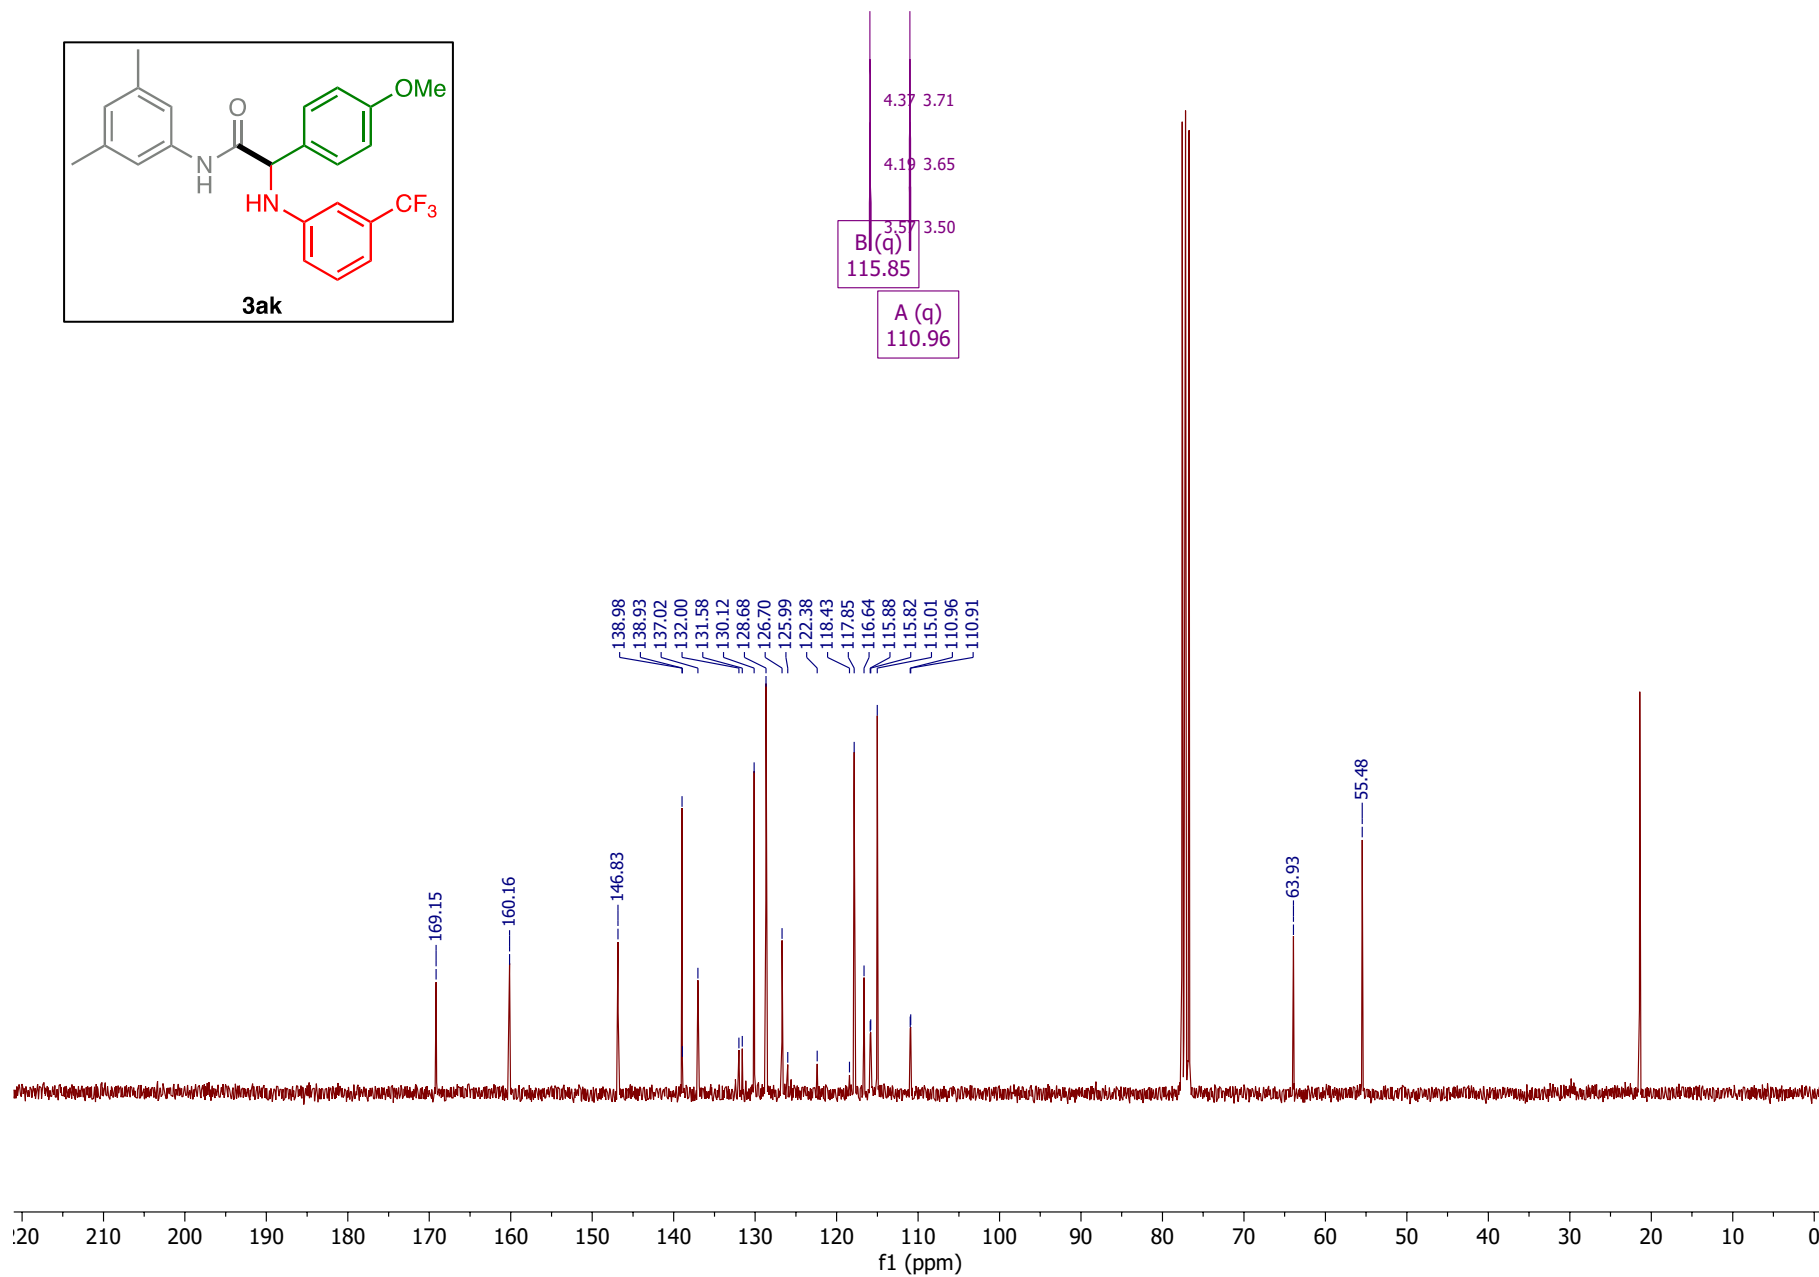

Bl(q)  
115.85

A (q)  
110.96

S109
